# Supplementary material for: The dynamic transmission of positional information in stau- mutants during Drosophila embryogenesis
Source: eLife. 2020 Jun 8;9:e54276. doi: 10.7554/eLife.54276 (PMC7332292; doi:10.7554/eLife.54276)
Supplement: Figure 1—source data 1. [file elife-54276-fig1-data1.xlsx]

## Sheet: HbProfiles-stauHL54
Figure 1-source data
HbProfiles-stau(dorsal)														HbProfiles-stau(ventral)
time(min) x/L	2.5	7.5	12.5	17.5	22.5	27.5	32.5	37.5	42.5	47.5	52.5	57.5		time(min) x/L	2.5	7.5	12.5	17.5	22.5	27.5	32.5	37.5	42.5	47.5	52.5	57.5
0.001	0.622758	0.346456	0.612972	0.359357	0.117512	0.502266	0.314827	0.432181	0.0607941	0.192016	0.619292	1		0.001	0.475269	0.241746	0.731978	0.206	0.352743	0.384347	0.624479	0.656241	0.403838	0.183791	0	1
0.002	0.633996	0.350187	0.612103	0.368664	0.121872	0.498547	0.322179	0.441789	0.0634655	0.196513	0.612708	1		0.002	0.492064	0.249237	0.726941	0.218679	0.348257	0.390134	0.636905	0.664977	0.405621	0.199	0	1
0.003	0.645244	0.353671	0.611987	0.377614	0.125926	0.49492	0.328638	0.450358	0.0660636	0.200579	0.605948	1		0.003	0.508958	0.256708	0.721284	0.231286	0.343948	0.396001	0.648295	0.672839	0.407203	0.213813	0.0102751	1
0.004	0.656333	0.356945	0.612208	0.386189	0.129605	0.491307	0.334425	0.457922	0.0685452	0.204257	0.599008	1		0.004	0.525784	0.263969	0.714994	0.243958	0.339917	0.401927	0.657847	0.679605	0.408581	0.228095	0.031788	1
0.005	0.666761	0.360017	0.612474	0.394177	0.132946	0.487655	0.339683	0.464527	0.070861	0.207596	0.591925	1		0.005	0.541662	0.270853	0.70834	0.256419	0.336366	0.407837	0.665692	0.685065	0.40978	0.241498	0.0532506	1
0.006	0.675975	0.362743	0.612465	0.40122	0.136098	0.483928	0.34451	0.470306	0.0730142	0.210619	0.584735	1		0.006	0.555849	0.27733	0.701508	0.268074	0.333471	0.413552	0.672647	0.689417	0.410803	0.253911	0.0746886	1
0.007	0.683522	0.365004	0.612215	0.407214	0.13914	0.480088	0.348901	0.475453	0.0750491	0.213346	0.577468	1		0.007	0.567817	0.2834	0.694605	0.278747	0.331182	0.418997	0.678889	0.693213	0.411631	0.265524	0.0961061	1
0.008	0.689052	0.366758	0.612035	0.412248	0.142005	0.476099	0.352798	0.479974	0.0770169	0.215785	0.570322	1		0.008	0.577344	0.288972	0.687675	0.288587	0.329284	0.424174	0.684092	0.696421	0.412301	0.276543	0.117201	1
0.009	0.693061	0.368076	0.612519	0.416531	0.144557	0.471936	0.356203	0.483725	0.0789743	0.217934	0.56363	1		0.009	0.585571	0.293982	0.680726	0.297864	0.327606	0.428986	0.688151	0.698547	0.412891	0.287161	0.137431	1
0.01	0.696726	0.369094	0.613657	0.420168	0.14673	0.467584	0.359157	0.486708	0.0809829	0.21983	0.557615	1		0.01	0.594725	0.298451	0.673783	0.306617	0.326156	0.433255	0.691143	0.699649	0.413516	0.297385	0.156215	1
0.011	0.700361	0.369981	0.614948	0.423179	0.148515	0.463091	0.361685	0.489049	0.0829737	0.22152	0.552429	1		0.011	0.60467	0.302603	0.66689	0.314705	0.325093	0.436956	0.693284	0.700226	0.414192	0.307023	0.172943	1
0.012	0.703787	0.370875	0.616105	0.425684	0.149957	0.458553	0.363854	0.490953	0.0847717	0.223008	0.54818	1		0.012	0.613464	0.306705	0.660121	0.322085	0.324299	0.440181	0.694961	0.700472	0.414858	0.315892	0.187979	1
0.013	0.706783	0.371753	0.617051	0.427883	0.151143	0.454038	0.365743	0.492691	0.0863091	0.22432	0.544984	1		0.013	0.620773	0.310831	0.653572	0.328804	0.323433	0.443004	0.696347	0.70039	0.415403	0.323878	0.202502	1
0.014	0.708988	0.372548	0.617735	0.429822	0.152181	0.449641	0.367395	0.494357	0.0876735	0.22551	0.542761	1		0.014	0.627731	0.314898	0.647278	0.334976	0.322453	0.445651	0.697386	0.699957	0.415632	0.331098	0.216805	1
0.015	0.710444	0.373304	0.618311	0.431421	0.153194	0.445467	0.368824	0.495884	0.0889912	0.226576	0.541118	1		0.015	0.634769	0.318857	0.641238	0.340778	0.321565	0.448475	0.698017	0.699061	0.415478	0.33768	0.230477	1
0.016	0.71154	0.374103	0.619051	0.432673	0.154272	0.441514	0.370074	0.49736	0.0903804	0.227472	0.53966	1		0.016	0.641723	0.322757	0.635424	0.346322	0.320855	0.451521	0.698222	0.69763	0.415038	0.343685	0.243426	1
0.017	0.721499	0.379258	0.618968	0.440763	0.158887	0.433578	0.382993	0.509374	0.0942132	0.23321	0.532986	1		0.017	0.661853	0.332958	0.624137	0.362401	0.317086	0.459626	0.712314	0.705546	0.415702	0.364262	0.276359	1
0.018	0.731212	0.384121	0.619091	0.448097	0.163325	0.425753	0.394387	0.520601	0.0980937	0.238326	0.526256	0.993531		0.018	0.680567	0.343189	0.612927	0.37791	0.313911	0.467451	0.724466	0.712289	0.416063	0.383266	0.308196	1
0.019	0.741164	0.388626	0.619389	0.454836	0.167619	0.418046	0.404259	0.530709	0.101931	0.242949	0.519598	0.96812		0.019	0.697491	0.3535	0.601888	0.392957	0.311324	0.474971	0.734759	0.717745	0.416115	0.400821	0.33893	1
0.02	0.751422	0.392635	0.619966	0.461069	0.17185	0.410474	0.412552	0.539261	0.105666	0.247115	0.51345	0.94259		0.02	0.712821	0.363816	0.591196	0.407513	0.309312	0.482166	0.74333	0.721579	0.415802	0.417088	0.368331	1
0.021	0.761384	0.396166	0.621118	0.466819	0.176066	0.403059	0.419228	0.546114	0.109334	0.250745	0.507925	0.917282		0.021	0.727243	0.374045	0.580849	0.421406	0.307897	0.489022	0.750152	0.723785	0.415115	0.432199	0.396255	1
0.022	0.770657	0.399449	0.622908	0.472043	0.180202	0.395849	0.424258	0.551494	0.112957	0.253781	0.502834	0.892435		0.022	0.741129	0.384146	0.570743	0.434639	0.307059	0.49559	0.755128	0.724607	0.41416	0.446124	0.422626	1
0.023	0.779054	0.402631	0.625141	0.476663	0.184181	0.388955	0.427799	0.555469	0.116537	0.256215	0.49812	0.868117		0.023	0.754534	0.39418	0.560897	0.447189	0.306714	0.502083	0.757978	0.724094	0.413159	0.458688	0.44748	1
0.024	0.785977	0.405708	0.627683	0.48066	0.187972	0.382548	0.430149	0.557898	0.120094	0.258051	0.493861	0.844292		0.024	0.767512	0.404202	0.551403	0.458839	0.306818	0.508877	0.758102	0.722186	0.41217	0.46978	0.47097	1
0.025	0.790414	0.408652	0.630528	0.48407	0.191606	0.376685	0.431492	0.558952	0.12366	0.259283	0.490113	0.820885		0.025	0.780117	0.41412	0.542266	0.469588	0.307422	0.515914	0.755951	0.719407	0.411085	0.479363	0.493057	1
0.026	0.792446	0.411498	0.633803	0.486984	0.195186	0.371307	0.431813	0.559106	0.127214	0.2599	0.486959	0.797825		0.026	0.792615	0.423722	0.533391	0.479658	0.308678	0.522708	0.753071	0.716887	0.409829	0.487471	0.513593	1
0.027	0.793561	0.414313	0.637388	0.489606	0.19871	0.366379	0.431099	0.558701	0.130685	0.260055	0.484506	0.775017		0.027	0.804756	0.432824	0.524764	0.489101	0.310732	0.529017	0.749895	0.714955	0.408359	0.494332	0.532669	1
0.028	0.795085	0.41707	0.640915	0.492249	0.202049	0.361885	0.429772	0.557962	0.133951	0.260063	0.4827	0.752418		0.028	0.815968	0.441445	0.516452	0.497806	0.313662	0.534851	0.746231	0.713112	0.406665	0.500367	0.550457	1
0.029	0.797137	0.419734	0.644273	0.494959	0.205111	0.357864	0.428373	0.556908	0.136966	0.260071	0.481242	0.730138		0.029	0.826069	0.449878	0.508511	0.50601	0.317595	0.540437	0.742212	0.711221	0.404856	0.505827	0.567088	0.990441
0.03	0.79906	0.42233	0.64761	0.497525	0.207929	0.354312	0.42743	0.555362	0.139764	0.260063	0.479846	0.70835		0.03	0.834801	0.458515	0.500987	0.514276	0.32272	0.545968	0.737828	0.709592	0.403162	0.510794	0.582585	0.972389
0.031	0.80037	0.424855	0.651226	0.499708	0.210615	0.35109	0.426907	0.553329	0.142351	0.25996	0.4784	0.687188		0.031	0.842208	0.4675	0.493929	0.52272	0.328967	0.55161	0.733733	0.708111	0.401685	0.515156	0.59698	0.953515
0.032	0.800756	0.427282	0.655071	0.501278	0.213313	0.348058	0.426694	0.551022	0.14471	0.259749	0.477	0.66676		0.032	0.848641	0.476661	0.487318	0.531117	0.335928	0.557364	0.730033	0.706187	0.400435	0.518809	0.610168	0.934081
0.033	0.800009	0.429636	0.658783	0.502233	0.216172	0.345171	0.426698	0.548656	0.146877	0.259512	0.475911	0.64715		0.033	0.85357	0.485786	0.481289	0.539262	0.343215	0.563051	0.726365	0.703789	0.399327	0.521681	0.621818	0.914557
0.034	0.798163	0.431992	0.662339	0.502742	0.219373	0.342543	0.426867	0.546359	0.148942	0.259325	0.475412	0.628501		0.034	0.856718	0.494708	0.476321	0.546817	0.350604	0.568615	0.722852	0.701352	0.398275	0.523821	0.63175	0.895075
0.035	0.795677	0.434368	0.665936	0.502956	0.222921	0.340382	0.427157	0.544266	0.150981	0.259218	0.475785	0.610945		0.035	0.858574	0.503323	0.472708	0.553572	0.357948	0.574179	0.720048	0.699164	0.397239	0.525471	0.639994	0.87542
0.036	0.792968	0.436803	0.669609	0.503219	0.226582	0.338818	0.427456	0.542515	0.153044	0.259133	0.477047	0.594509		0.036	0.859778	0.511649	0.470299	0.559884	0.365264	0.579961	0.717868	0.697404	0.396263	0.526955	0.646573	0.855642
0.037	0.790272	0.439441	0.673329	0.504008	0.230159	0.337845	0.42761	0.541028	0.155122	0.259014	0.478972	0.579175		0.037	0.860656	0.519776	0.468858	0.566261	0.372668	0.586087	0.715656	0.695804	0.3955	0.528418	0.651518	0.836093
0.038	0.787919	0.4425	0.676876	0.505402	0.233612	0.33746	0.427633	0.539548	0.15714	0.258931	0.481366	0.564831		0.038	0.861569	0.527863	0.468166	0.572694	0.380265	0.592493	0.713326	0.693664	0.395262	0.529743	0.654873	0.817271
0.039	0.786312	0.446228	0.680051	0.507173	0.237049	0.337659	0.427675	0.537977	0.159061	0.259051	0.483942	0.551315		0.039	0.862802	0.536215	0.468003	0.578977	0.387937	0.599073	0.711299	0.69118	0.395701	0.530812	0.656913	0.799195
0.04	0.785416	0.450611	0.682574	0.509134	0.240703	0.338418	0.427858	0.536377	0.160938	0.259495	0.486408	0.538583		0.04	0.863736	0.544973	0.468315	0.584896	0.395663	0.605806	0.709898	0.689441	0.396628	0.531529	0.658062	0.781702
0.041	0.784756	0.455345	0.684599	0.511297	0.24485	0.33979	0.428281	0.534988	0.162826	0.260314	0.488609	0.526719		0.041	0.862844	0.554103	0.469101	0.590491	0.403637	0.612852	0.709307	0.688704	0.397712	0.532019	0.658773	0.764798
0.042	0.78462	0.46008	0.686696	0.513763	0.249604	0.341854	0.429029	0.534183	0.164802	0.261475	0.490463	0.515834		0.042	0.860295	0.563443	0.470275	0.59617	0.411722	0.620375	0.709466	0.68826	0.398794	0.532549	0.65964	0.748497
0.043	0.785679	0.464673	0.689303	0.516581	0.254962	0.344622	0.430089	0.533848	0.166963	0.262868	0.491798	0.506043		0.043	0.857886	0.572821	0.47184	0.602481	0.419664	0.628417	0.710002	0.687793	0.399885	0.53339	0.660544	0.732854
0.044	0.788382	0.469273	0.692454	0.51971	0.260823	0.347903	0.431388	0.533436	0.169365	0.264369	0.492341	0.497215		0.044	0.856202	0.582279	0.473908	0.609592	0.427522	0.636896	0.710787	0.687446	0.401104	0.534976	0.660607	0.717669
0.045	0.79305	0.474038	0.696151	0.523226	0.266947	0.351346	0.432869	0.532712	0.171965	0.265909	0.49203	0.489052		0.045	0.854466	0.591906	0.476585	0.617282	0.43535	0.645586	0.71206	0.687383	0.402715	0.537594	0.659696	0.702824
0.046	0.799364	0.479001	0.700267	0.527271	0.273049	0.354723	0.434443	0.531817	0.174701	0.267525	0.491166	0.481284		0.046	0.852403	0.601683	0.479927	0.625265	0.443111	0.65425	0.713914	0.687739	0.404938	0.541417	0.658331	0.688384
0.047	0.806278	0.484071	0.704457	0.531871	0.278902	0.358046	0.436048	0.530844	0.177449	0.269348	0.490077	0.47353		0.047	0.850454	0.611532	0.48393	0.633296	0.450891	0.663056	0.716329	0.688738	0.407758	0.546334	0.656725	0.674217
0.048	0.81232	0.489105	0.708394	0.537085	0.284462	0.361462	0.437642	0.529777	0.180078	0.271512	0.488986	0.465604		0.048	0.849247	0.621218	0.488547	0.641312	0.458722	0.672259	0.719112	0.690637	0.411073	0.551959	0.654825	0.660151
0.049	0.816725	0.494008	0.711915	0.542952	0.289816	0.365113	0.43919	0.528833	0.182553	0.273968	0.488123	0.457671		0.049	0.849401	0.630496	0.493649	0.649376	0.466485	0.681849	0.722079	0.69327	0.414772	0.558055	0.652424	0.64629
0.05	0.819676	0.498801	0.714746	0.549318	0.29496	0.369111	0.440776	0.527933	0.184978	0.276492	0.48748	0.450233		0.05	0.850834	0.639302	0.499042	0.657669	0.474066	0.691672	0.72522	0.696514	0.418796	0.564411	0.649672	0.633047
0.051	0.821963	0.503562	0.716784	0.555915	0.299843	0.373513	0.442522	0.526918	0.187445	0.278972	0.486653	0.443484		0.051	0.853121	0.647765	0.504505	0.666475	0.481436	0.70155	0.728519	0.700455	0.42324	0.570953	0.64686	0.620577
0.052	0.824543	0.50834	0.718021	0.562501	0.304562	0.378262	0.444384	0.525718	0.189927	0.281471	0.485446	0.437155		0.052	0.855396	0.656077	0.509906	0.675741	0.48874	0.71141	0.732028	0.704727	0.428072	0.577557	0.644058	0.608688
0.053	0.827906	0.513068	0.718682	0.568983	0.309311	0.38324	0.446268	0.524398	0.192409	0.284058	0.483902	0.430921		0.053	0.85682	0.66437	0.515259	0.685066	0.496127	0.721207	0.735746	0.708572	0.433024	0.584109	0.641145	0.597162
0.054	0.831987	0.517626	0.71925	0.575391	0.314315	0.388341	0.448123	0.523139	0.194915	0.286806	0.482106	0.424617		0.054	0.857054	0.672664	0.520501	0.694301	0.503732	0.730821	0.739545	0.71156	0.43791	0.590791	0.637983	0.585963
0.055	0.836259	0.521999	0.720177	0.581885	0.319592	0.393412	0.449857	0.522068	0.197474	0.289839	0.480198	0.418244		0.055	0.856208	0.680912	0.525819	0.703592	0.511695	0.739932	0.743369	0.713675	0.442901	0.597902	0.634415	0.575171
0.056	0.84042	0.526112	0.721635	0.588767	0.324907	0.398432	0.451495	0.521026	0.200083	0.293247	0.478237	0.411985		0.056	0.855157	0.68904	0.531536	0.71296	0.519974	0.748615	0.747504	0.715066	0.44839	0.605811	0.630509	0.56496
0.057	0.84452	0.529965	0.723438	0.596019	0.330133	0.403425	0.453098	0.519882	0.202709	0.296972	0.476133	0.406043		0.057	0.85486	0.697024	0.537739	0.722048	0.528426	0.757387	0.75214	0.715576	0.454327	0.614417	0.626458	0.555413
0.058	0.848607	0.533765	0.725523	0.603254	0.335439	0.408451	0.454829	0.518782	0.205343	0.300802	0.47376	0.400557		0.058	0.855636	0.704874	0.544357	0.730504	0.537073	0.766484	0.757275	0.715088	0.460522	0.623192	0.622228	0.546464
0.059	0.852311	0.537703	0.727936	0.609993	0.340976	0.413619	0.456641	0.517642	0.208052	0.304601	0.471038	0.395551		0.059	0.857402	0.712539	0.5513	0.738408	0.545756	0.775992	0.762726	0.713989	0.467012	0.631779	0.617766	0.538227
0.06	0.855242	0.541902	0.73036	0.616043	0.346713	0.418913	0.458383	0.516283	0.210838	0.308438	0.46822	0.391006		0.06	0.860092	0.719723	0.558496	0.745752	0.554017	0.785793	0.768328	0.712694	0.473689	0.640086	0.613035	0.530967
0.061	0.857726	0.546419	0.732482	0.621655	0.352533	0.424332	0.460049	0.514937	0.213639	0.31246	0.465692	0.386937		0.061	0.863537	0.726132	0.565964	0.752325	0.561478	0.795627	0.773827	0.711551	0.480306	0.648265	0.607997	0.524716
0.062	0.860469	0.551205	0.73413	0.627181	0.358276	0.429959	0.46179	0.513905	0.216452	0.316719	0.463612	0.383345		0.062	0.867208	0.731981	0.573821	0.758538	0.568162	0.805285	0.778994	0.711069	0.48678	0.656451	0.602598	0.519314
0.063	0.864095	0.55611	0.735504	0.632794	0.363722	0.435824	0.463765	0.513224	0.219335	0.321265	0.46183	0.380199		0.063	0.870193	0.737584	0.582157	0.764907	0.574425	0.81474	0.783828	0.711521	0.493198	0.664567	0.596991	0.514819
0.064	0.869134	0.560985	0.73691	0.638435	0.368571	0.441751	0.465869	0.512782	0.222362	0.3261	0.459964	0.377403		0.064	0.87238	0.742952	0.590612	0.771462	0.580531	0.824207	0.788591	0.712496	0.499785	0.672423	0.591555	0.511221
0.065	0.874945	0.565817	0.738487	0.644044	0.37264	0.447435	0.467878	0.512365	0.225458	0.331279	0.457799	0.374813		0.065	0.873863	0.748151	0.598501	0.778111	0.586722	0.833636	0.793423	0.713636	0.50666	0.680005	0.58645	0.508306
0.066	0.879839	0.570612	0.740238	0.649695	0.376104	0.452711	0.469775	0.511632	0.228474	0.336792	0.455252	0.372383		0.066	0.874643	0.753428	0.605487	0.784698	0.59328	0.842773	0.79826	0.715198	0.513791	0.687447	0.58161	0.505816
0.067	0.883111	0.575313	0.742265	0.655448	0.37937	0.457559	0.471814	0.510438	0.231374	0.342638	0.452498	0.370198		0.067	0.874668	0.758806	0.611667	0.790939	0.600148	0.851408	0.803111	0.717475	0.521117	0.69485	0.577163	0.503501
0.068	0.885253	0.57987	0.744545	0.661158	0.382797	0.461979	0.47424	0.509007	0.234236	0.348789	0.449964	0.368332		0.068	0.874031	0.76411	0.617262	0.796633	0.607063	0.859508	0.808019	0.720799	0.528553	0.70223	0.57337	0.501171
0.069	0.886585	0.584284	0.746685	0.666722	0.386699	0.465934	0.477008	0.507701	0.237134	0.355043	0.447717	0.366806		0.069	0.872689	0.769231	0.622525	0.801868	0.614	0.867117	0.812916	0.725274	0.535907	0.709515	0.570217	0.498881
0.07	0.887346	0.588398	0.748461	0.672248	0.391098	0.46944	0.480002	0.506885	0.24004	0.361215	0.445591	0.365728		0.07	0.870819	0.774212	0.627786	0.806765	0.62121	0.874202	0.817774	0.730153	0.543057	0.717104	0.567431	0.496798
0.071	0.887648	0.592177	0.749796	0.677732	0.395715	0.47257	0.483059	0.506613	0.242814	0.367224	0.443583	0.365114		0.071	0.868934	0.779196	0.63321	0.811394	0.628768	0.880807	0.822626	0.734704	0.550058	0.725676	0.564979	0.494873
0.072	0.887649	0.595865	0.750882	0.683066	0.400281	0.475463	0.486009	0.506436	0.245346	0.373088	0.441761	0.36488		0.072	0.867491	0.784377	0.638908	0.815939	0.63629	0.887121	0.827418	0.739193	0.557036	0.73526	0.563081	0.493106
0.073	0.887538	0.599753	0.751846	0.688147	0.404742	0.478275	0.488826	0.506005	0.247652	0.378922	0.440025	0.365005		0.073	0.867009	0.789844	0.645082	0.82059	0.643481	0.893285	0.832132	0.743914	0.563992	0.745396	0.561763	0.491561
0.074	0.887171	0.603816	0.75274	0.692894	0.409045	0.481155	0.491545	0.505598	0.249848	0.384861	0.438307	0.365362		0.074	0.867796	0.795404	0.651733	0.825044	0.650473	0.899169	0.837016	0.748556	0.570955	0.755133	0.560949	0.490262
0.075	0.886254	0.607762	0.75368	0.697278	0.413121	0.484382	0.49424	0.505608	0.252017	0.391005	0.436606	0.365758		0.075	0.869496	0.800711	0.658574	0.829092	0.657395	0.904684	0.841934	0.753209	0.577855	0.763955	0.560521	0.489366
0.076	0.885008	0.611449	0.754643	0.701306	0.417088	0.488173	0.497078	0.506154	0.254259	0.39746	0.435041	0.366032		0.076	0.871359	0.805648	0.665138	0.832993	0.664239	0.909883	0.846313	0.758412	0.584547	0.771932	0.5602	0.489021
0.077	0.883861	0.614865	0.755448	0.705179	0.42116	0.492508	0.500204	0.507045	0.256648	0.404217	0.433801	0.366134		0.077	0.87346	0.810264	0.670969	0.837132	0.67088	0.914704	0.850016	0.764052	0.591051	0.77889	0.559637	0.489312
0.078	0.88317	0.617963	0.756305	0.709072	0.425624	0.497238	0.503621	0.507869	0.259221	0.411147	0.432926	0.366149		0.078	0.876151	0.814602	0.675942	0.841835	0.677333	0.918977	0.853225	0.769236	0.597406	0.78504	0.558821	0.490173
0.079	0.884072	0.620875	0.757953	0.712758	0.43065	0.502182	0.507118	0.508465	0.261979	0.41797	0.4323	0.366235		0.079	0.879151	0.81882	0.680257	0.847092	0.683831	0.922749	0.856412	0.773306	0.60367	0.790714	0.558072	0.491486
0.08	0.887493	0.623869	0.760721	0.716057	0.436141	0.507063	0.510548	0.509175	0.264857	0.424522	0.431826	0.366549		0.08	0.881977	0.823123	0.684196	0.852442	0.69048	0.926188	0.859865	0.776477	0.60986	0.795785	0.557607	0.493088
0.081	0.892754	0.627182	0.764449	0.718923	0.441945	0.511703	0.513873	0.509647	0.267727	0.430863	0.431451	0.367245		0.081	0.884738	0.827527	0.687991	0.856983	0.697263	0.929377	0.86352	0.779423	0.615946	0.800191	0.557391	0.494774
0.082	0.898541	0.630948	0.768852	0.721269	0.448	0.516003	0.517064	0.509898	0.270533	0.437177	0.431143	0.368358		0.082	0.887384	0.831906	0.691849	0.859995	0.704083	0.932627	0.866994	0.782274	0.621862	0.803993	0.5573	0.496366
0.083	0.903524	0.635098	0.773539	0.723201	0.454142	0.519858	0.520189	0.510355	0.27336	0.443626	0.430862	0.369806		0.083	0.890087	0.836137	0.696093	0.861703	0.710891	0.936209	0.870065	0.78479	0.6277	0.8075	0.55724	0.497664
0.084	0.906088	0.639576	0.778343	0.72496	0.460243	0.52339	0.523229	0.51125	0.276421	0.450282	0.430633	0.371559		0.084	0.893412	0.840181	0.701103	0.862741	0.717929	0.940077	0.872901	0.787218	0.633752	0.811309	0.557383	0.498789
0.085	0.90591	0.644421	0.783258	0.726712	0.466061	0.526788	0.52605	0.512535	0.279691	0.457113	0.430406	0.373583		0.085	0.897071	0.844089	0.706907	0.863519	0.725186	0.944005	0.875636	0.790182	0.639975	0.815402	0.557871	0.500233
0.086	0.904403	0.649464	0.788361	0.728441	0.471428	0.53013	0.52878	0.514094	0.2829	0.463922	0.430046	0.375746		0.086	0.900269	0.848006	0.712821	0.864365	0.732281	0.947716	0.878327	0.793799	0.645986	0.819079	0.558719	0.50227
0.087	0.902914	0.654437	0.793736	0.729948	0.476479	0.533381	0.53155	0.515836	0.285854	0.47044	0.429552	0.377957		0.087	0.902228	0.852112	0.718353	0.865684	0.738988	0.951068	0.880775	0.797575	0.65137	0.821686	0.559941	0.504712
0.088	0.902279	0.659242	0.799516	0.731226	0.481289	0.536718	0.534473	0.517697	0.288484	0.476671	0.42903	0.380273		0.088	0.901824	0.856343	0.723611	0.868152	0.745159	0.954079	0.882856	0.801335	0.656138	0.823465	0.561407	0.507327
0.089	0.902839	0.663809	0.805663	0.732501	0.485769	0.54048	0.537513	0.519716	0.290894	0.482849	0.428569	0.382711		0.089	0.899032	0.860534	0.728623	0.871989	0.750956	0.956733	0.884646	0.805532	0.660496	0.825503	0.562968	0.509977
0.09	0.904595	0.66818	0.811939	0.733987	0.490094	0.544642	0.540659	0.522028	0.293231	0.488995	0.428191	0.385188		0.09	0.894602	0.864579	0.733158	0.876703	0.756632	0.958909	0.886058	0.810051	0.664472	0.828207	0.564659	0.512617
0.091	0.907284	0.672473	0.818005	0.735617	0.494539	0.548916	0.543999	0.524625	0.295702	0.494934	0.427866	0.387636		0.091	0.889079	0.868612	0.737207	0.88182	0.761926	0.960625	0.88693	0.814164	0.668195	0.831381	0.566598	0.515261
0.092	0.910199	0.676697	0.823681	0.73698	0.499145	0.553047	0.547504	0.527275	0.298471	0.500577	0.42768	0.390014		0.092	0.88326	0.872723	0.740854	0.886753	0.766377	0.962024	0.887475	0.817824	0.672007	0.834506	0.568764	0.518011
0.093	0.912385	0.680744	0.828521	0.737878	0.503852	0.556801	0.550967	0.529715	0.301488	0.505999	0.427888	0.392346		0.093	0.878314	0.876835	0.744042	0.890488	0.770281	0.963192	0.888194	0.82148	0.676069	0.837458	0.571043	0.521011
0.094	0.913154	0.684484	0.832196	0.738626	0.508778	0.559968	0.554162	0.531888	0.304533	0.51129	0.42869	0.39463		0.094	0.875112	0.881041	0.746733	0.892377	0.774153	0.964092	0.889139	0.825086	0.680224	0.840584	0.573439	0.524182
0.095	0.911996	0.688084	0.834871	0.739479	0.514275	0.562688	0.557143	0.533941	0.307397	0.516467	0.430036	0.396988		0.095	0.873998	0.885513	0.749215	0.892626	0.777903	0.964584	0.889844	0.8285	0.68421	0.844138	0.575956	0.527304
0.096	0.909891	0.691849	0.83692	0.740327	0.520428	0.565424	0.560139	0.536037	0.310068	0.521423	0.431627	0.399645		0.096	0.874715	0.890153	0.751761	0.892	0.781359	0.964888	0.889998	0.831735	0.687846	0.847909	0.578489	0.530258
0.097	0.908915	0.695794	0.838652	0.741047	0.526934	0.568404	0.563275	0.5383	0.312636	0.526054	0.433228	0.402589		0.097	0.876289	0.894637	0.754352	0.891358	0.784596	0.965413	0.889584	0.834721	0.691134	0.851133	0.580911	0.533087
0.098	0.910675	0.699654	0.84038	0.741568	0.533542	0.5717	0.566528	0.540849	0.315164	0.530269	0.434734	0.405587		0.098	0.877937	0.898742	0.756985	0.891379	0.7875	0.9662	0.888794	0.837095	0.694062	0.853604	0.583153	0.536161
0.099	0.914882	0.703307	0.842405	0.741936	0.540039	0.575511	0.569848	0.543737	0.317681	0.534132	0.436149	0.408424		0.099	0.879305	0.902647	0.759727	0.892319	0.789761	0.96713	0.887997	0.838362	0.696594	0.85571	0.585175	0.539658
0.1	0.920444	0.706842	0.845116	0.742333	0.546181	0.579964	0.57329	0.546846	0.320272	0.537827	0.437637	0.411023		0.1	0.880927	0.906541	0.762615	0.894008	0.79137	0.968251	0.887409	0.838831	0.698797	0.857948	0.587062	0.543451
0.101	0.926064	0.710376	0.848436	0.742943	0.552009	0.585028	0.576869	0.549833	0.3231	0.541481	0.439396	0.41346		0.101	0.883187	0.91028	0.765667	0.896254	0.792787	0.969778	0.886858	0.839573	0.700747	0.86017	0.589064	0.547565
0.102	0.930407	0.71386	0.852109	0.743956	0.557648	0.590611	0.580665	0.552644	0.326366	0.545125	0.441416	0.415953		0.102	0.885789	0.913648	0.768712	0.898844	0.794263	0.971975	0.886162	0.840804	0.702604	0.861702	0.591218	0.552115
0.103	0.932808	0.717204	0.855819	0.745327	0.562951	0.596456	0.584673	0.555548	0.330052	0.548674	0.443586	0.41865		0.103	0.888321	0.91661	0.7713	0.901402	0.795926	0.974751	0.885457	0.841908	0.704652	0.862404	0.593327	0.557007
0.104	0.933192	0.720407	0.859675	0.746977	0.567812	0.602204	0.588655	0.55852	0.333917	0.552017	0.445863	0.421545		0.104	0.890087	0.919199	0.773025	0.903452	0.798058	0.97769	0.884818	0.842898	0.707295	0.862604	0.595344	0.561976
0.105	0.931798	0.723674	0.863868	0.749085	0.572595	0.607476	0.59235	0.561405	0.337862	0.555144	0.448326	0.424669		0.105	0.890813	0.921627	0.773783	0.904866	0.800573	0.980654	0.883912	0.844209	0.710568	0.863215	0.597296	0.566754
0.106	0.929307	0.727382	0.868623	0.751718	0.57782	0.612008	0.595716	0.564145	0.341946	0.558117	0.451045	0.428165		0.106	0.891199	0.924119	0.773837	0.905912	0.803134	0.983692	0.882968	0.845435	0.714323	0.864581	0.599143	0.571273
0.107	0.926357	0.731744	0.873905	0.754614	0.583388	0.61585	0.598648	0.566508	0.346267	0.56093	0.453934	0.432068		0.107	0.8922	0.926827	0.773783	0.906959	0.805785	0.986655	0.882343	0.845694	0.718484	0.866424	0.60101	0.575551
0.108	0.923836	0.736707	0.879434	0.757285	0.588775	0.619265	0.601141	0.568548	0.350708	0.563736	0.456715	0.436263		0.108	0.893508	0.929821	0.774309	0.908079	0.808806	0.989319	0.881994	0.84532	0.72284	0.868186	0.603227	0.579393
0.109	0.922755	0.742324	0.884732	0.759372	0.593672	0.62248	0.603417	0.570715	0.355043	0.566682	0.459234	0.440703		0.109	0.894499	0.933029	0.775852	0.909063	0.811905	0.991486	0.881896	0.845636	0.727326	0.868928	0.605794	0.582794
0.11	0.922676	0.748436	0.888897	0.760976	0.598024	0.625686	0.60581	0.573102	0.359167	0.569857	0.461753	0.445347		0.11	0.895206	0.936288	0.778204	0.909656	0.814554	0.993179	0.881929	0.847123	0.731864	0.868566	0.608408	0.585984
0.111	0.921828	0.754551	0.891647	0.762302	0.601836	0.628936	0.608454	0.575358	0.363026	0.573323	0.464478	0.450116		0.111	0.896092	0.939319	0.780783	0.909847	0.816649	0.994708	0.881836	0.849182	0.736356	0.867761	0.610905	0.58919
0.112	0.919553	0.760278	0.893421	0.763441	0.605142	0.632349	0.611323	0.577945	0.366539	0.576993	0.467471	0.455037		0.112	0.897327	0.941981	0.783215	0.910213	0.818433	0.996319	0.881416	0.851263	0.740586	0.867409	0.613366	0.592566
0.113	0.916229	0.765511	0.894751	0.764603	0.607954	0.636228	0.614436	0.580822	0.36966	0.580615	0.470687	0.460123		0.113	0.899167	0.94431	0.78532	0.911479	0.820257	0.997823	0.881054	0.853685	0.744284	0.867793	0.615924	0.596268
0.114	0.912638	0.770327	0.895996	0.765925	0.610394	0.640784	0.617765	0.583698	0.372481	0.583971	0.474098	0.465347		0.114	0.901409	0.946454	0.786875	0.913677	0.822335	0.999149	0.8811	0.856875	0.74735	0.868776	0.618678	0.600461
0.115	0.909997	0.774665	0.897328	0.767405	0.612643	0.645827	0.621387	0.586622	0.375047	0.587041	0.477774	0.470536		0.115	0.903569	0.948592	0.787663	0.916381	0.824248	1.00065	0.881415	0.860465	0.749802	0.869848	0.62155	0.604944
0.116	0.908929	0.778443	0.898735	0.768979	0.614935	0.651077	0.625328	0.589693	0.377565	0.589767	0.481801	0.475689		0.116	0.905147	0.950733	0.787831	0.919252	0.825548	1.00236	0.881719	0.863903	0.751795	0.870696	0.624371	0.609325
0.117	0.909433	0.7819	0.89987	0.770527	0.617401	0.656399	0.629362	0.593009	0.380404	0.592118	0.486138	0.481081		0.117	0.906708	0.952664	0.78779	0.922037	0.826374	1.00403	0.88189	0.866968	0.753612	0.871351	0.627139	0.613434
0.118	0.911656	0.785441	0.900313	0.771876	0.620155	0.661554	0.633303	0.596659	0.383643	0.594348	0.490698	0.486752		0.118	0.90912	0.954167	0.787593	0.924526	0.826984	1.00551	0.882079	0.869517	0.755521	0.871972	0.629965	0.617312
0.119	0.914688	0.789185	0.899971	0.772854	0.623286	0.665957	0.637023	0.600419	0.387173	0.596726	0.495371	0.492492		0.119	0.911993	0.955403	0.787268	0.926188	0.827555	1.00664	0.882521	0.871261	0.757762	0.872509	0.633014	0.621157
0.12	0.916407	0.793085	0.899209	0.773374	0.62676	0.669046	0.640585	0.603749	0.390867	0.599344	0.500006	0.498078		0.12	0.91428	0.956619	0.787236	0.926905	0.827644	1.00731	0.883164	0.872007	0.760505	0.872513	0.636437	0.625274
0.121	0.915771	0.796934	0.898411	0.773365	0.630418	0.670748	0.644159	0.6063	0.394618	0.602295	0.504569	0.503371		0.121	0.915846	0.957948	0.787707	0.927301	0.826934	1.00759	0.883728	0.872523	0.763868	0.871635	0.640071	0.629688
0.122	0.913405	0.800525	0.897854	0.773087	0.634292	0.671526	0.647718	0.608383	0.39834	0.60572	0.509061	0.508209		0.122	0.917027	0.959463	0.788304	0.927535	0.826088	1.00761	0.88414	0.873942	0.767914	0.870008	0.643607	0.634162
0.123	0.910249	0.803962	0.897489	0.773006	0.638542	0.671964	0.651179	0.610575	0.401904	0.609626	0.513341	0.512604		0.123	0.917848	0.961185	0.788754	0.927407	0.826049	1.00752	0.884456	0.876256	0.772324	0.86827	0.647091	0.638513
0.124	0.907124	0.807545	0.897786	0.77325	0.643193	0.672769	0.654614	0.6132	0.405291	0.61382	0.517204	0.516734		0.124	0.917784	0.962908	0.789042	0.927212	0.826839	1.00755	0.884601	0.878469	0.776724	0.866693	0.65074	0.64265
0.125	0.905067	0.811453	0.899417	0.773764	0.647943	0.674382	0.658085	0.616154	0.4086	0.618007	0.520604	0.520879		0.125	0.916715	0.964136	0.78912	0.927621	0.82777	1.00808	0.884542	0.880233	0.780758	0.865152	0.654562	0.646682
0.126	0.905084	0.815503	0.90227	0.774713	0.652181	0.676797	0.661616	0.619135	0.411822	0.621959	0.523863	0.525087		0.126	0.914444	0.964642	0.788998	0.929425	0.828658	1.00927	0.884427	0.881709	0.784259	0.863535	0.658365	0.650739
0.127	0.906881	0.819338	0.905744	0.776209	0.65563	0.679881	0.665169	0.62211	0.414827	0.625576	0.527339	0.529187		0.127	0.910546	0.964638	0.789011	0.932586	0.829587	1.01061	0.88433	0.88254	0.787164	0.862	0.662215	0.654836
0.128	0.909457	0.822857	0.909683	0.778008	0.65851	0.683469	0.668556	0.625196	0.417693	0.628891	0.53111	0.533178		0.128	0.905842	0.964611	0.789426	0.936385	0.830351	1.01163	0.884231	0.882319	0.789571	0.861271	0.66633	0.658913
0.129	0.911681	0.826275	0.91427	0.779818	0.661082	0.687439	0.671595	0.628221	0.420667	0.632124	0.535119	0.537249		0.129	0.901627	0.965045	0.790284	0.940081	0.831137	1.01226	0.884213	0.881417	0.791784	0.861547	0.670546	0.662976
0.13	0.912894	0.829586	0.91998	0.78149	0.66371	0.691407	0.674255	0.630984	0.424001	0.635407	0.5391	0.541665		0.13	0.898494	0.965858	0.791353	0.943353	0.832446	1.01267	0.8845	0.880515	0.793851	0.862474	0.674446	0.667175
0.131	0.91292	0.832569	0.92623	0.782857	0.666831	0.694851	0.676524	0.633652	0.427825	0.638694	0.542932	0.546585		0.131	0.895867	0.966481	0.792211	0.946182	0.834275	1.01294	0.884953	0.879693	0.795734	0.863469	0.677822	0.671563
0.132	0.912643	0.835221	0.931508	0.783605	0.670569	0.697563	0.678431	0.636353	0.431987	0.641937	0.546703	0.551868		0.132	0.893897	0.966489	0.792549	0.948379	0.836259	1.01287	0.885283	0.878854	0.797737	0.863846	0.680722	0.675907
0.133	0.913415	0.837907	0.935076	0.783707	0.674856	0.699563	0.680044	0.638906	0.436183	0.645211	0.550466	0.557275		0.133	0.893467	0.96603	0.792411	0.950054	0.83836	1.0119	0.885815	0.878344	0.800196	0.863221	0.683394	0.680129
0.134	0.915529	0.840982	0.93673	0.783604	0.679499	0.700887	0.681424	0.641261	0.440303	0.648654	0.554233	0.562708		0.134	0.895644	0.965306	0.792157	0.952112	0.840323	1.00981	0.886344	0.878283	0.803124	0.861542	0.686115	0.684403
0.135	0.91839	0.844401	0.936629	0.783595	0.684203	0.701579	0.682804	0.643644	0.444435	0.65236	0.558055	0.568141		0.135	0.901896	0.964185	0.792055	0.955588	0.841776	1.00704	0.886542	0.878468	0.806212	0.858935	0.688964	0.689062
0.136	0.921448	0.847813	0.934882	0.783489	0.688512	0.701792	0.684445	0.646107	0.448531	0.656343	0.561826	0.573513		0.136	0.912156	0.962577	0.792259	0.960354	0.842798	1.00407	0.886541	0.878855	0.809251	0.855558	0.691831	0.694554
0.137	0.924408	0.850906	0.931847	0.783122	0.691826	0.701905	0.686289	0.648773	0.452342	0.660444	0.565443	0.578533		0.137	0.924089	0.960714	0.792834	0.965542	0.843322	1.00114	0.886314	0.879528	0.81209	0.851633	0.694752	0.700843
0.138	0.927098	0.853512	0.928172	0.782726	0.694196	0.702428	0.688247	0.651979	0.455627	0.664423	0.569028	0.583202		0.138	0.935326	0.958973	0.79366	0.970197	0.842939	0.998392	0.885916	0.880612	0.814411	0.847443	0.697773	0.707372
0.139	0.928923	0.855593	0.924505	0.78271	0.696249	0.703532	0.690346	0.655815	0.458327	0.668009	0.572889	0.587674		0.139	0.944358	0.957358	0.794389	0.973696	0.841737	0.996108	0.885489	0.881826	0.816079	0.843808	0.700713	0.713719
0.14	0.929445	0.857006	0.92107	0.783132	0.698357	0.705201	0.692492	0.659977	0.460571	0.67111	0.577237	0.591777		0.14	0.949964	0.955603	0.794561	0.975811	0.840307	0.994588	0.885056	0.882596	0.817146	0.841598	0.70339	0.719784
0.141	0.929174	0.857692	0.918551	0.78358	0.700632	0.707273	0.694512	0.664078	0.462523	0.673817	0.581873	0.595563		0.141	0.951939	0.953564	0.794103	0.976609	0.838983	0.993759	0.884621	0.882773	0.817746	0.840835	0.705794	0.725571
0.142	0.929288	0.858014	0.917845	0.783693	0.703189	0.709621	0.696319	0.668031	0.464387	0.676239	0.58647	0.599263		0.142	0.951336	0.951429	0.793482	0.976759	0.837664	0.993197	0.884334	0.882717	0.818091	0.841019	0.707949	0.730928
0.143	0.929439	0.858305	0.918976	0.783453	0.706199	0.712145	0.697899	0.671924	0.466514	0.678527	0.590726	0.602922		0.143	0.949288	0.949444	0.792907	0.977192	0.836382	0.992748	0.884182	0.882312	0.818621	0.841183	0.709726	0.735677
0.144	0.929065	0.85858	0.92101	0.783045	0.709977	0.714462	0.69931	0.675705	0.469095	0.680989	0.594625	0.606342		0.144	0.946019	0.947605	0.792214	0.97792	0.835444	0.992459	0.883868	0.881213	0.819797	0.840607	0.711222	0.739843
0.145	0.928755	0.858777	0.923026	0.782671	0.714644	0.716331	0.700832	0.679309	0.472026	0.683995	0.598372	0.609363		0.145	0.941791	0.945662	0.7914	0.978559	0.834734	0.99215	0.883228	0.879438	0.821858	0.838747	0.712779	0.743481
0.146	0.929236	0.858993	0.924254	0.782499	0.719956	0.71762	0.702563	0.68252	0.475088	0.68763	0.602034	0.612417		0.146	0.937372	0.943499	0.790648	0.979088	0.833868	0.991283	0.882412	0.877453	0.824715	0.835707	0.7146	0.74678
0.147	0.930479	0.859356	0.924034	0.78279	0.725528	0.718054	0.704334	0.685256	0.478082	0.691879	0.605538	0.616036		0.147	0.934014	0.941211	0.790084	0.979528	0.833036	0.989545	0.881694	0.87541	0.828154	0.832074	0.71675	0.750023
0.148	0.931556	0.859996	0.922506	0.783647	0.731192	0.717593	0.706093	0.687637	0.480828	0.696596	0.608922	0.620155		0.148	0.931495	0.939026	0.789977	0.980091	0.832439	0.987455	0.881083	0.873345	0.831709	0.828845	0.719199	0.753353
0.149	0.930965	0.86086	0.920744	0.784971	0.736693	0.716683	0.708032	0.689822	0.483228	0.701424	0.61229	0.624367		0.149	0.928047	0.937166	0.79036	0.98058	0.831728	0.98561	0.880337	0.87161	0.83483	0.826449	0.721774	0.756842
0.15	0.928758	0.861789	0.91947	0.786671	0.741543	0.715948	0.710274	0.692004	0.485119	0.706007	0.615629	0.628367		0.15	0.92344	0.935553	0.790633	0.980523	0.83068	0.984262	0.879244	0.870631	0.837338	0.824591	0.724495	0.760477
0.151	0.926918	0.862717	0.918682	0.788556	0.745377	0.715745	0.712636	0.694516	0.486472	0.710052	0.618886	0.632034		0.151	0.918953	0.93413	0.790197	0.979823	0.829806	0.983553	0.877995	0.870444	0.839229	0.823002	0.72765	0.764067
0.152	0.926836	0.863728	0.918135	0.790374	0.748098	0.716209	0.714837	0.697802	0.487501	0.713382	0.622186	0.635542		0.152	0.915948	0.933004	0.789095	0.978276	0.829658	0.983328	0.876972	0.870319	0.84037	0.821872	0.731441	0.767476
0.153	0.928348	0.864877	0.918017	0.792009	0.749845	0.717436	0.716888	0.701767	0.488562	0.715944	0.625767	0.639297		0.153	0.91508	0.931806	0.787882	0.976179	0.830207	0.983382	0.876245	0.86991	0.840489	0.821474	0.735857	0.770816
0.154	0.930683	0.865997	0.918737	0.793508	0.750931	0.719553	0.718773	0.705722	0.489957	0.717887	0.629908	0.643468		0.154	0.916369	0.930121	0.786783	0.974484	0.83107	0.983628	0.875591	0.869408	0.839612	0.821461	0.741219	0.774051
0.155	0.933323	0.866958	0.919951	0.794854	0.751694	0.722059	0.720503	0.709316	0.491897	0.719453	0.634783	0.647979		0.155	0.919471	0.928213	0.78568	0.973694	0.831947	0.983902	0.874698	0.868782	0.838436	0.821076	0.748361	0.777074
0.156	0.935624	0.8678	0.92066	0.795789	0.752589	0.724213	0.72219	0.712769	0.494516	0.720912	0.640254	0.652639		0.156	0.923423	0.926493	0.78458	0.973702	0.833038	0.983919	0.873924	0.867981	0.838015	0.8198	0.757425	0.779685
0.157	0.936735	0.868707	0.920389	0.796047	0.754167	0.725838	0.723888	0.71625	0.497834	0.722523	0.646009	0.657362		0.157	0.927806	0.924986	0.783507	0.973862	0.834713	0.983394	0.874488	0.867067	0.838633	0.817725	0.767767	0.781966
0.158	0.936505	0.869851	0.919115	0.795694	0.756739	0.726897	0.72585	0.719768	0.501923	0.72451	0.651883	0.662095		0.158	0.932418	0.923643	0.782474	0.973866	0.83695	0.982465	0.875799	0.866125	0.840008	0.815307	0.778819	0.784141
0.159	0.935252	0.871373	0.916575	0.794986	0.760223	0.727688	0.728399	0.72319	0.506633	0.726899	0.657693	0.666707		0.159	0.935916	0.922261	0.781742	0.973679	0.839437	0.981099	0.877367	0.865616	0.841856	0.812449	0.790119	0.786313
0.16	0.933435	0.873296	0.912372	0.794087	0.764043	0.72805	0.731677	0.726406	0.511583	0.729498	0.663154	0.671144		0.16	0.937859	0.920701	0.781182	0.973111	0.841565	0.979368	0.878448	0.866299	0.843886	0.808819	0.801855	0.78838
0.161	0.932272	0.875622	0.906241	0.793147	0.767511	0.727581	0.735543	0.72944	0.516373	0.732179	0.66804	0.675435		0.161	0.939347	0.91913	0.780423	0.971912	0.842918	0.977556	0.878523	0.868452	0.846037	0.804465	0.813723	0.790255
0.162	0.932429	0.878172	0.89926	0.792472	0.77035	0.726483	0.739643	0.732198	0.520741	0.734832	0.67226	0.679605		0.162	0.941274	0.917908	0.779532	0.969889	0.843788	0.97577	0.878036	0.871984	0.84822	0.799964	0.824392	0.791986
0.163	0.932732	0.880696	0.893522	0.792305	0.772484	0.725108	0.743619	0.734747	0.524715	0.737297	0.675953	0.683682		0.163	0.943366	0.917307	0.778687	0.967308	0.844575	0.9742	0.877615	0.876013	0.850072	0.796342	0.832923	0.793712
0.164	0.932296	0.882954	0.890111	0.79248	0.773965	0.72378	0.747229	0.737343	0.528338	0.739447	0.679296	0.687551		0.164	0.944691	0.917169	0.777974	0.964791	0.844825	0.973232	0.876872	0.879152	0.851142	0.793946	0.838998	0.795375
0.165	0.931146	0.884688	0.889142	0.792636	0.775193	0.723001	0.750566	0.74011	0.531521	0.741156	0.682423	0.691154		0.165	0.944043	0.917048	0.777528	0.96243	0.844122	0.973052	0.875744	0.881202	0.851109	0.792376	0.842933	0.79684
0.166	0.92957	0.885883	0.889809	0.792647	0.776549	0.72326	0.753738	0.743004	0.534406	0.742393	0.685513	0.694574		0.166	0.939453	0.916963	0.77745	0.959751	0.842899	0.973494	0.874584	0.88275	0.850023	0.790859	0.845712	0.79805
0.167	0.92801	0.8869	0.891348	0.79267	0.778168	0.724777	0.756758	0.745908	0.53717	0.743252	0.688734	0.697907		0.167	0.929796	0.91698	0.777624	0.957042	0.841809	0.974212	0.873533	0.884086	0.848125	0.78923	0.847914	0.798737
0.168	0.926678	0.888081	0.892916	0.792765	0.780204	0.727308	0.759712	0.748602	0.539972	0.743971	0.692246	0.70147		0.168	0.916419	0.916785	0.777919	0.955061	0.841479	0.974864	0.872685	0.885021	0.845855	0.787588	0.849456	0.798881
0.169	0.925574	0.889519	0.893896	0.792763	0.782728	0.730335	0.762698	0.750811	0.542915	0.744977	0.695787	0.705256		0.169	0.901523	0.916016	0.778232	0.954303	0.842096	0.975272	0.872087	0.88546	0.843806	0.785659	0.850312	0.798927
0.17	0.925203	0.891237	0.894128	0.79241	0.785605	0.733521	0.765704	0.752355	0.546156	0.74667	0.698863	0.709072		0.17	0.887149	0.914934	0.778608	0.954569	0.843028	0.975191	0.871659	0.885751	0.842269	0.783229	0.850941	0.799431
0.171	0.925377	0.893397	0.893969	0.791763	0.788739	0.736591	0.768826	0.753391	0.549898	0.749058	0.701414	0.713056		0.171	0.875321	0.914164	0.779102	0.955079	0.843732	0.974441	0.871255	0.886197	0.841267	0.780358	0.851687	0.800592
0.172	0.925142	0.896	0.893372	0.791259	0.791851	0.73929	0.772246	0.754359	0.554113	0.751961	0.703828	0.717242		0.172	0.867294	0.913985	0.779721	0.955815	0.844329	0.973102	0.870719	0.886956	0.840814	0.777454	0.852491	0.802344
0.173	0.924092	0.898606	0.891781	0.791165	0.794599	0.741464	0.776027	0.755534	0.558497	0.755193	0.706481	0.721513		0.173	0.862437	0.914241	0.780427	0.957015	0.845424	0.971526	0.870057	0.887932	0.840854	0.77484	0.853323	0.804697
0.174	0.922977	0.900862	0.889316	0.791608	0.796903	0.74303	0.780017	0.75699	0.562783	0.75853	0.709509	0.725797		0.174	0.859755	0.91478	0.78103	0.957925	0.847333	0.969811	0.8694	0.889158	0.841176	0.772659	0.854182	0.807646
0.175	0.92183	0.902791	0.887015	0.792726	0.798582	0.744265	0.783993	0.758728	0.56687	0.761586	0.712802	0.730108		0.175	0.858916	0.915566	0.781303	0.957971	0.849559	0.967904	0.868698	0.890868	0.841644	0.771125	0.85488	0.810973
0.176	0.919719	0.904543	0.885978	0.794249	0.799445	0.745289	0.787643	0.76045	0.570576	0.763895	0.716192	0.734428		0.176	0.859153	0.916539	0.781308	0.957478	0.851727	0.965948	0.867999	0.893228	0.842345	0.77053	0.855327	0.814533
0.177	0.915984	0.906139	0.886653	0.795556	0.799754	0.746099	0.790764	0.762074	0.573939	0.765259	0.719707	0.738417		0.177	0.85998	0.917252	0.781138	0.956905	0.854216	0.964411	0.867387	0.895708	0.843208	0.77068	0.855625	0.818139
0.178	0.911061	0.90755	0.888975	0.796094	0.80015	0.747143	0.793329	0.763661	0.577219	0.765711	0.723454	0.741563		0.178	0.861192	0.917234	0.780564	0.956256	0.857172	0.963782	0.866749	0.897674	0.844006	0.771102	0.855818	0.821357
0.179	0.906233	0.908696	0.892244	0.795702	0.801209	0.748941	0.79532	0.76531	0.580539	0.765525	0.727452	0.743937		0.179	0.862141	0.916465	0.779067	0.95513	0.860269	0.963965	0.866028	0.899067	0.84485	0.77133	0.855848	0.824074
0.18	0.902649	0.909442	0.894945	0.794648	0.803019	0.751734	0.796587	0.76713	0.584003	0.76506	0.731413	0.745985		0.18	0.86284	0.91527	0.776801	0.95321	0.863314	0.964421	0.865052	0.900228	0.84601	0.771161	0.855602	0.826413
0.181	0.900747	0.909806	0.89589	0.793145	0.805346	0.755317	0.797244	0.768999	0.587967	0.764601	0.735186	0.747904		0.181	0.863073	0.913963	0.774605	0.951119	0.865987	0.964807	0.863736	0.901347	0.847688	0.770799	0.854854	0.828425
0.182	0.899988	0.909904	0.894867	0.791334	0.807985	0.759037	0.797728	0.77064	0.592638	0.764488	0.738986	0.749789		0.182	0.862229	0.91256	0.772808	0.949759	0.867584	0.964881	0.862209	0.902338	0.849814	0.770102	0.853227	0.830154
0.183	0.899339	0.909861	0.892632	0.789487	0.810889	0.762638	0.798588	0.771842	0.598	0.764964	0.743081	0.75173		0.183	0.859323	0.911066	0.771248	0.949805	0.868031	0.964683	0.86067	0.903309	0.852351	0.768958	0.850442	0.831895
0.184	0.898493	0.909888	0.889917	0.787766	0.81397	0.766069	0.800174	0.772709	0.603664	0.76603	0.747574	0.753895		0.184	0.85411	0.909976	0.769671	0.951558	0.867953	0.964292	0.859173	0.904358	0.855416	0.767225	0.846498	0.833881
0.185	0.897665	0.910079	0.887049	0.786187	0.816844	0.768966	0.802612	0.77358	0.609227	0.767531	0.752139	0.756269		0.185	0.847462	0.90953	0.767931	0.95436	0.86772	0.963544	0.857616	0.905111	0.859061	0.7651	0.841129	0.836258
0.186	0.89689	0.910373	0.884363	0.784948	0.819183	0.771315	0.80588	0.774506	0.614525	0.769307	0.756181	0.758571		0.186	0.84023	0.909249	0.766104	0.957096	0.867463	0.962227	0.856148	0.905166	0.862859	0.763356	0.833705	0.839006
0.187	0.895672	0.910876	0.882238	0.784296	0.82074	0.773545	0.809753	0.775288	0.619446	0.771277	0.759487	0.760727		0.187	0.833177	0.908661	0.764338	0.959291	0.866961	0.960086	0.854761	0.904675	0.866106	0.762623	0.824356	0.841953
0.188	0.893394	0.911602	0.880866	0.784297	0.821595	0.775911	0.813835	0.775914	0.623893	0.773341	0.762188	0.762952		0.188	0.827553	0.907693	0.762857	0.96104	0.866154	0.957365	0.852447	0.904339	0.868652	0.76295	0.813955	0.84485
0.189	0.889964	0.912387	0.880549	0.784834	0.822219	0.778646	0.817481	0.776402	0.627628	0.775494	0.764403	0.765338		0.189	0.823929	0.906374	0.761774	0.962315	0.865408	0.954579	0.849694	0.904813	0.87076	0.763788	0.80309	0.847547
0.19	0.8856	0.913037	0.881564	0.78575	0.823091	0.781484	0.820249	0.776854	0.630613	0.777833	0.766264	0.767894		0.19	0.822133	0.904692	0.760767	0.963037	0.864948	0.95223	0.846881	0.905852	0.872807	0.764946	0.792082	0.850027
0.191	0.880307	0.913348	0.883873	0.786949	0.82448	0.784451	0.822009	0.777671	0.633029	0.780407	0.768042	0.770262		0.191	0.821542	0.90258	0.75991	0.963431	0.864906	0.950526	0.844543	0.906337	0.875012	0.766726	0.780522	0.852029
0.192	0.873977	0.913232	0.887055	0.788309	0.826401	0.788028	0.82287	0.779014	0.634996	0.783107	0.770138	0.77218		0.192	0.821187	0.900148	0.759763	0.963931	0.865296	0.94931	0.842898	0.905622	0.877172	0.769107	0.768794	0.853127
0.193	0.867435	0.91286	0.890554	0.789686	0.828558	0.792303	0.823321	0.780657	0.636614	0.78584	0.772815	0.773829		0.193	0.82054	0.897697	0.760403	0.965188	0.865644	0.948442	0.84184	0.903835	0.879054	0.771758	0.758514	0.85326
0.194	0.862453	0.912529	0.893857	0.791048	0.830551	0.797084	0.823869	0.782338	0.638092	0.788673	0.77609	0.775532		0.194	0.819262	0.895367	0.761492	0.967532	0.865418	0.947845	0.841168	0.901653	0.880485	0.773864	0.750538	0.85279
0.195	0.859493	0.912439	0.89647	0.792398	0.832038	0.802081	0.824808	0.783947	0.639667	0.791692	0.779965	0.777629		0.195	0.817561	0.893215	0.762465	0.970616	0.8649	0.947389	0.840767	0.900006	0.88164	0.775216	0.744643	0.851989
0.196	0.858308	0.912708	0.898058	0.793781	0.832944	0.806821	0.82621	0.785353	0.6416	0.794957	0.784279	0.780197		0.196	0.815672	0.891494	0.7627	0.973676	0.864994	0.946851	0.840599	0.899131	0.883047	0.776227	0.740302	0.850924
0.197	0.858906	0.913454	0.898712	0.79526	0.833404	0.811031	0.828062	0.786408	0.64388	0.798324	0.788572	0.782877		0.197	0.814277	0.890107	0.762077	0.976179	0.865887	0.946146	0.840667	0.89884	0.884927	0.777645	0.736876	0.849491
0.198	0.861036	0.914627	0.898774	0.796709	0.833582	0.81483	0.830273	0.78721	0.646416	0.801543	0.792521	0.785165		0.198	0.814335	0.888724	0.760894	0.977956	0.867151	0.945502	0.840966	0.898803	0.887274	0.77946	0.73415	0.847762
0.199	0.864252	0.915903	0.898695	0.79804	0.833706	0.818259	0.832639	0.78787	0.649266	0.804293	0.795854	0.786903		0.199	0.816117	0.887309	0.759312	0.978971	0.868585	0.94512	0.841173	0.898877	0.889851	0.781426	0.732407	0.846218
0.2	0.867765	0.917019	0.898894	0.799336	0.833976	0.821106	0.835144	0.788437	0.652353	0.806091	0.798661	0.788197		0.2	0.819149	0.885766	0.757466	0.979059	0.870403	0.945011	0.841136	0.898956	0.892385	0.783758	0.731725	0.84497
0.201	0.870296	0.917845	0.899604	0.800719	0.834573	0.823298	0.837717	0.789176	0.655464	0.806585	0.801364	0.789408		0.201	0.822614	0.883802	0.755365	0.978355	0.872987	0.945253	0.841149	0.898841	0.894637	0.786462	0.7317	0.843617
0.202	0.871382	0.918198	0.90084	0.802258	0.835374	0.825027	0.84008	0.7903	0.65843	0.805945	0.804102	0.790815		0.202	0.825417	0.881171	0.753079	0.977689	0.876039	0.945863	0.841382	0.898538	0.896739	0.789209	0.731927	0.841972
0.203	0.871372	0.918017	0.902696	0.803903	0.836321	0.826817	0.841978	0.791684	0.661319	0.804582	0.80675	0.792602		0.203	0.826185	0.877898	0.750935	0.977235	0.878905	0.946794	0.8417	0.898241	0.899193	0.791483	0.732147	0.840082
0.204	0.870389	0.917534	0.905092	0.805574	0.837577	0.829079	0.843374	0.793131	0.664322	0.802882	0.809255	0.794719		0.204	0.82422	0.874176	0.749201	0.976317	0.881309	0.947769	0.841865	0.898348	0.902055	0.792721	0.732123	0.837933
0.205	0.868627	0.917023	0.907614	0.807128	0.839125	0.831727	0.8445	0.794464	0.667609	0.801196	0.811565	0.796932		0.205	0.819194	0.870133	0.748077	0.974654	0.883073	0.948611	0.841763	0.898937	0.90506	0.793046	0.731992	0.835225
0.206	0.866976	0.916588	0.909647	0.808231	0.840789	0.834515	0.845593	0.795794	0.67128	0.799898	0.813502	0.799312		0.206	0.810738	0.865913	0.747734	0.972658	0.883943	0.949228	0.841645	0.899324	0.907904	0.792907	0.73204	0.831914
0.207	0.866286	0.916184	0.910539	0.808984	0.842413	0.837546	0.846658	0.797124	0.675313	0.799332	0.815058	0.801952		0.207	0.800357	0.861941	0.747897	0.970473	0.884041	0.949263	0.841548	0.899235	0.910112	0.792552	0.732101	0.828515
0.208	0.867148	0.915907	0.910195	0.809921	0.84374	0.841173	0.847773	0.798352	0.679272	0.799724	0.81643	0.804763		0.208	0.790254	0.858641	0.748036	0.967978	0.883839	0.948408	0.841392	0.899061	0.911582	0.792219	0.731721	0.825704
0.209	0.868992	0.915952	0.909058	0.811347	0.844332	0.845418	0.849298	0.799573	0.682842	0.801263	0.817737	0.807674		0.209	0.781472	0.856194	0.747994	0.965606	0.883604	0.946711	0.841344	0.899424	0.912508	0.792115	0.730798	0.823683
0.21	0.87014	0.916255	0.907704	0.813265	0.843783	0.849821	0.851471	0.800975	0.686077	0.803889	0.818958	0.810373		0.21	0.774876	0.854455	0.74799	0.964139	0.883394	0.944414	0.841484	0.900336	0.912854	0.792209	0.729554	0.821974
0.211	0.869801	0.916901	0.906843	0.815629	0.842336	0.853829	0.854335	0.802581	0.689299	0.807217	0.820286	0.812882		0.211	0.770992	0.85296	0.748107	0.963987	0.883325	0.941903	0.842018	0.901351	0.912729	0.792381	0.728277	0.820269
0.212	0.86807	0.918044	0.907121	0.818643	0.840873	0.857409	0.857744	0.804331	0.692714	0.810818	0.821877	0.815463		0.212	0.770058	0.851335	0.748224	0.964623	0.883353	0.939575	0.842829	0.902087	0.912256	0.792371	0.727256	0.818807
0.213	0.86598	0.919591	0.908712	0.822447	0.840038	0.861063	0.86151	0.806056	0.69623	0.814222	0.823622	0.818326		0.213	0.771623	0.849382	0.748377	0.965531	0.883719	0.937706	0.843704	0.902082	0.911571	0.792296	0.726666	0.817599
0.214	0.864452	0.921333	0.911326	0.82691	0.839863	0.86499	0.865249	0.807713	0.699531	0.81716	0.825154	0.821618		0.214	0.77461	0.846858	0.748737	0.966712	0.884497	0.93627	0.844553	0.901319	0.91081	0.792287	0.726578	0.816301
0.215	0.863875	0.923049	0.914385	0.831668	0.840256	0.868991	0.868542	0.809443	0.702447	0.819607	0.826061	0.825007		0.215	0.777522	0.843587	0.749467	0.967675	0.885292	0.935191	0.845505	0.900128	0.910016	0.79248	0.726733	0.814532
0.216	0.863919	0.924731	0.917331	0.836162	0.841525	0.872995	0.871362	0.811195	0.704963	0.821668	0.82629	0.82817		0.216	0.778644	0.839872	0.750653	0.968021	0.885955	0.934618	0.846769	0.898917	0.909131	0.79306	0.726885	0.811995
0.217	0.863379	0.926434	0.919758	0.840074	0.843755	0.877213	0.873555	0.812778	0.706947	0.823457	0.826117	0.831193		0.217	0.77751	0.836222	0.751929	0.968101	0.886186	0.934749	0.848344	0.898358	0.908066	0.794311	0.727017	0.808806
0.218	0.862075	0.927872	0.921489	0.84346	0.846545	0.881906	0.874902	0.814123	0.708359	0.825042	0.82591	0.834169		0.218	0.774775	0.832865	0.752816	0.967923	0.886077	0.935752	0.849963	0.898509	0.906907	0.796072	0.727049	0.805535
0.219	0.860686	0.928743	0.922562	0.846438	0.849441	0.887023	0.875587	0.815273	0.70933	0.826509	0.826069	0.836985		0.219	0.770538	0.829741	0.75296	0.967206	0.886028	0.937398	0.851457	0.898749	0.905878	0.797749	0.726799	0.802537
0.22	0.85967	0.929062	0.923006	0.848973	0.851911	0.89212	0.876118	0.816358	0.710376	0.827848	0.826774	0.839745		0.22	0.765663	0.826791	0.752136	0.965881	0.886081	0.939254	0.852807	0.898729	0.905254	0.799071	0.726032	0.799844
0.221	0.859119	0.929014	0.922881	0.851036	0.853532	0.896897	0.876827	0.817515	0.71209	0.829173	0.827959	0.842497		0.221	0.761948	0.824254	0.750625	0.963987	0.886194	0.940975	0.85408	0.89858	0.904941	0.799967	0.724761	0.79743
0.222	0.859035	0.928944	0.92247	0.852675	0.854452	0.901326	0.8778	0.818695	0.714646	0.830586	0.829395	0.845311		0.222	0.760528	0.822312	0.748772	0.961946	0.88627	0.942211	0.855602	0.898476	0.90463	0.800533	0.723334	0.795379
0.223	0.859176	0.929091	0.922136	0.854015	0.854804	0.905489	0.879103	0.81996	0.717949	0.832116	0.830824	0.848242		0.223	0.76162	0.820611	0.746653	0.960562	0.886124	0.942683	0.857502	0.898328	0.904319	0.800796	0.722001	0.794177
0.224	0.859219	0.929453	0.922066	0.855198	0.854641	0.909568	0.880653	0.821583	0.721744	0.833808	0.83207	0.851165		0.224	0.764949	0.818704	0.744496	0.959936	0.885637	0.942255	0.8593	0.897879	0.904061	0.800711	0.720887	0.794057
0.225	0.858799	0.929929	0.922287	0.856465	0.854314	0.913678	0.882296	0.823722	0.725691	0.835503	0.833033	0.853809		0.225	0.769655	0.816402	0.742703	0.959601	0.884791	0.940964	0.860781	0.897012	0.904146	0.800686	0.720236	0.794525
0.226	0.85819	0.930277	0.922952	0.857904	0.85428	0.917893	0.883965	0.826386	0.729587	0.836966	0.833556	0.85597		0.226	0.774685	0.81378	0.741582	0.959254	0.883595	0.93902	0.862209	0.895792	0.904937	0.801001	0.720442	0.795302
0.227	0.857663	0.930302	0.924215	0.859286	0.854632	0.922386	0.885655	0.829446	0.733237	0.838042	0.833438	0.85761		0.227	0.779428	0.810955	0.741068	0.958849	0.881872	0.936787	0.863724	0.894322	0.906186	0.80164	0.721301	0.79637
0.228	0.856939	0.929893	0.926064	0.860414	0.855386	0.927148	0.887397	0.832617	0.736584	0.838801	0.8328	0.859106		0.228	0.783272	0.808061	0.740866	0.958265	0.879673	0.93455	0.865145	0.89253	0.907357	0.802665	0.722076	0.797548
0.229	0.855897	0.929017	0.928338	0.861341	0.856689	0.93181	0.889288	0.835527	0.739752	0.839469	0.831972	0.860932		0.229	0.785677	0.805158	0.740762	0.957171	0.877536	0.932317	0.866303	0.890424	0.908347	0.804256	0.722335	0.798607
0.23	0.854619	0.927827	0.930705	0.862263	0.858403	0.93612	0.891328	0.838149	0.742794	0.8404	0.831331	0.863036		0.23	0.78642	0.802117	0.740425	0.955256	0.875695	0.930162	0.867287	0.888356	0.909493	0.806152	0.721998	0.799362
0.231	0.85347	0.926557	0.932869	0.863383	0.860133	0.940062	0.893242	0.840797	0.745803	0.841971	0.831168	0.865235		0.231	0.785594	0.799014	0.739533	0.952495	0.873866	0.928302	0.868283	0.886614	0.910982	0.807634	0.721232	0.799857
0.232	0.852707	0.925424	0.934616	0.864753	0.861608	0.943572	0.894949	0.843462	0.748997	0.84438	0.831592	0.867172		0.232	0.784279	0.796098	0.738271	0.949499	0.871809	0.926824	0.869346	0.884996	0.913001	0.807908	0.720214	0.800321
0.233	0.852215	0.924605	0.935787	0.866344	0.862847	0.946655	0.896531	0.845832	0.752428	0.847634	0.832551	0.868537		0.233	0.784078	0.793537	0.737037	0.946861	0.870039	0.925796	0.870316	0.883256	0.915144	0.807049	0.719057	0.800758
0.234	0.851889	0.924287	0.936298	0.868117	0.863874	0.949229	0.898117	0.847878	0.755984	0.851634	0.83391	0.86918		0.234	0.785586	0.791308	0.735879	0.944605	0.869157	0.924995	0.871159	0.881498	0.916413	0.805754	0.718077	0.801115
0.235	0.851955	0.924597	0.936208	0.870001	0.864617	0.951215	0.899784	0.849663	0.75965	0.856208	0.835364	0.869285		0.235	0.788563	0.789295	0.734735	0.943094	0.868837	0.924072	0.872135	0.879687	0.916209	0.804865	0.717481	0.801467
0.236	0.852653	0.925398	0.935696	0.871967	0.864958	0.952784	0.901377	0.851111	0.763174	0.861191	0.836679	0.869026		0.236	0.792815	0.787369	0.733668	0.943023	0.868537	0.92295	0.873552	0.877777	0.914694	0.804662	0.716976	0.802155
0.237	0.853841	0.92653	0.934986	0.874143	0.865065	0.954169	0.902739	0.852187	0.766233	0.866299	0.838003	0.868305		0.237	0.798203	0.785563	0.732511	0.944407	0.868422	0.921835	0.875422	0.876141	0.912331	0.804832	0.716298	0.803256
0.238	0.855324	0.928105	0.934307	0.876601	0.865398	0.955667	0.903979	0.853365	0.768884	0.871048	0.839394	0.867071		0.238	0.803536	0.783876	0.730882	0.946827	0.868676	0.921167	0.877396	0.874523	0.909516	0.805148	0.715523	0.80426
0.239	0.856196	0.930034	0.933874	0.879114	0.866197	0.957418	0.905361	0.85495	0.771561	0.874998	0.84064	0.865765		0.239	0.806461	0.782225	0.728737	0.949781	0.868645	0.920929	0.87908	0.872562	0.906585	0.805505	0.715175	0.804543
0.24	0.855419	0.931951	0.933757	0.881398	0.867502	0.959364	0.906997	0.856579	0.774342	0.877695	0.841581	0.864923		0.24	0.805772	0.780453	0.726375	0.952458	0.867527	0.920681	0.8803	0.870411	0.90389	0.805948	0.715396	0.804199
0.241	0.853563	0.933619	0.933889	0.883438	0.869403	0.96154	0.908906	0.857585	0.777105	0.87915	0.842212	0.864703		0.241	0.802018	0.778392	0.724032	0.954037	0.865239	0.920282	0.881239	0.868613	0.901851	0.806483	0.715727	0.803881
0.242	0.851768	0.934886	0.934175	0.885234	0.87184	0.964005	0.910886	0.85781	0.779483	0.879902	0.84253	0.86484		0.242	0.796565	0.775965	0.721798	0.9544	0.862169	0.91994	0.88216	0.867559	0.900514	0.807114	0.715684	0.803711
0.243	0.850206	0.935653	0.934327	0.88655	0.874586	0.966608	0.912578	0.857699	0.781302	0.880411	0.84254	0.865042		0.243	0.790284	0.773263	0.719608	0.95401	0.85884	0.919487	0.883548	0.867643	0.8997	0.807875	0.714855	0.803125
0.244	0.848075	0.935894	0.933989	0.887225	0.877509	0.968982	0.913819	0.857778	0.782698	0.881054	0.842371	0.865247		0.244	0.78355	0.7705	0.717459	0.952969	0.855446	0.918516	0.885441	0.869127	0.899368	0.808648	0.713109	0.802193
0.245	0.845093	0.935663	0.933004	0.88724	0.880348	0.970544	0.91473	0.858116	0.784159	0.882032	0.842153	0.865374		0.245	0.777266	0.767882	0.715362	0.950853	0.851896	0.917057	0.887442	0.87143	0.899408	0.809136	0.71073	0.801411
0.246	0.841495	0.935237	0.931587	0.886926	0.882466	0.97115	0.91535	0.858425	0.786168	0.883358	0.841821	0.86542		0.246	0.772854	0.765566	0.713229	0.94778	0.848235	0.915483	0.88936	0.873686	0.899529	0.809116	0.708307	0.801085
0.247	0.838501	0.934761	0.930135	0.886819	0.883326	0.97122	0.915452	0.858813	0.789044	0.884924	0.84151	0.865428		0.247	0.772067	0.763542	0.711049	0.944451	0.844581	0.914016	0.891341	0.875431	0.899421	0.808477	0.706204	0.801292
0.248	0.837766	0.934192	0.928869	0.887138	0.883155	0.97104	0.915214	0.859517	0.793099	0.886522	0.841518	0.865396		0.248	0.774369	0.761576	0.709275	0.941707	0.841099	0.912708	0.893413	0.876643	0.89896	0.806941	0.704324	0.801774
0.249	0.839589	0.933619	0.927699	0.887984	0.88267	0.970602	0.91518	0.860438	0.798798	0.887976	0.841816	0.865245		0.249	0.777137	0.759553	0.708348	0.940073	0.837814	0.911617	0.895373	0.877767	0.898112	0.80464	0.70262	0.802002
0.25	0.842909	0.933068	0.926587	0.889302	0.882266	0.969843	0.915622	0.861442	0.80594	0.889336	0.841954	0.864936		0.25	0.779104	0.757661	0.708208	0.939231	0.834383	0.910855	0.897277	0.878923	0.896724	0.80212	0.701281	0.801777
0.251	0.845738	0.932456	0.925503	0.890995	0.882162	0.96895	0.916421	0.862424	0.813621	0.890694	0.841593	0.864283		0.251	0.780201	0.75596	0.708288	0.938774	0.830395	0.910398	0.899546	0.88015	0.894687	0.799881	0.700483	0.801356
0.252	0.847182	0.931734	0.924528	0.893224	0.882462	0.968305	0.917395	0.863229	0.820125	0.891892	0.84097	0.863184		0.252	0.780072	0.754197	0.70809	0.938871	0.82568	0.910007	0.902141	0.881313	0.892	0.79824	0.700035	0.801096
0.253	0.847449	0.930846	0.923847	0.896234	0.883162	0.968054	0.918538	0.86363	0.824706	0.892785	0.840471	0.861919		0.253	0.778076	0.752107	0.707433	0.939636	0.820225	0.909434	0.904276	0.882148	0.888934	0.79702	0.699613	0.801137
0.254	0.846896	0.929902	0.923284	0.899828	0.884234	0.968102	0.919746	0.863401	0.827611	0.893412	0.84008	0.860649		0.254	0.773521	0.749773	0.706262	0.940204	0.814368	0.908573	0.905545	0.882808	0.886081	0.796034	0.699035	0.801255
0.255	0.845885	0.929034	0.922462	0.903428	0.885336	0.968375	0.920847	0.862515	0.829266	0.8939	0.839642	0.859378		0.255	0.766385	0.74745	0.704522	0.939817	0.808706	0.907443	0.906288	0.883544	0.88422	0.795088	0.698118	0.801051
0.256	0.844733	0.928185	0.920872	0.906673	0.886348	0.968801	0.921612	0.861025	0.830198	0.894377	0.838919	0.858302		0.256	0.757406	0.745245	0.702164	0.938549	0.803514	0.906051	0.906811	0.884549	0.88347	0.793871	0.696566	0.800515
0.257	0.843454	0.927292	0.918452	0.909664	0.887451	0.969231	0.92185	0.859002	0.83104	0.894774	0.837818	0.857655		0.257	0.747454	0.743054	0.69937	0.936577	0.798842	0.904491	0.907062	0.886041	0.883293	0.792343	0.694094	0.79981
0.258	0.8418	0.926302	0.915564	0.912829	0.888595	0.96958	0.921447	0.85665	0.832327	0.894961	0.836627	0.857414		0.258	0.73742	0.740687	0.69685	0.934044	0.794755	0.902959	0.907066	0.888065	0.883328	0.790508	0.691063	0.799045
0.259	0.839448	0.925268	0.912532	0.916109	0.889485	0.969835	0.920484	0.854311	0.834307	0.895027	0.835657	0.85722		0.259	0.727782	0.738154	0.69502	0.931248	0.790917	0.901458	0.906982	0.89039	0.883495	0.788144	0.688191	0.798449
0.26	0.835806	0.924265	0.909606	0.919064	0.889872	0.970082	0.919204	0.852236	0.836877	0.895146	0.835024	0.856837		0.26	0.718574	0.73582	0.69354	0.928576	0.786765	0.899992	0.9068	0.892897	0.883405	0.785091	0.685807	0.798355
0.261	0.830958	0.923228	0.90705	0.921591	0.889907	0.970503	0.917925	0.850332	0.839635	0.89539	0.834761	0.856485		0.261	0.709879	0.734042	0.692355	0.926375	0.782347	0.898589	0.906434	0.895553	0.882578	0.781741	0.683747	0.798602
0.262	0.825659	0.922009	0.90486	0.923795	0.889853	0.971327	0.916896	0.848388	0.841967	0.895842	0.834814	0.856589		0.262	0.702139	0.73266	0.691635	0.924818	0.77796	0.897302	0.906202	0.8986	0.880825	0.778899	0.68182	0.798842
0.263	0.82068	0.920573	0.902951	0.925611	0.889764	0.972779	0.916163	0.846285	0.843005	0.896504	0.835062	0.857165		0.263	0.695117	0.731226	0.691252	0.923641	0.773572	0.896212	0.9068	0.902622	0.878062	0.777784	0.680108	0.798785
0.264	0.816445	0.919004	0.901217	0.92702	0.889721	0.974799	0.915832	0.84407	0.842406	0.897238	0.835216	0.857809		0.264	0.687929	0.729461	0.690894	0.922568	0.768911	0.895123	0.907992	0.907334	0.874593	0.778472	0.678712	0.79834
0.265	0.812642	0.917396	0.899348	0.928148	0.889801	0.977112	0.915758	0.841726	0.840681	0.897803	0.834713	0.858094		0.265	0.680579	0.727354	0.690298	0.921531	0.763808	0.893841	0.909551	0.91147	0.87092	0.779992	0.677445	0.797751
0.266	0.809183	0.915711	0.89717	0.929123	0.889945	0.979654	0.915635	0.839366	0.838523	0.897905	0.833523	0.857934		0.266	0.67367	0.725096	0.689114	0.919952	0.758475	0.89239	0.911033	0.914414	0.867651	0.781685	0.676183	0.797294
0.267	0.806223	0.913932	0.894718	0.930102	0.890184	0.982355	0.915352	0.837349	0.836709	0.897422	0.832135	0.857595		0.267	0.667487	0.72294	0.687246	0.917175	0.753164	0.890622	0.912151	0.916738	0.865168	0.783299	0.674986	0.797152
0.268	0.803562	0.912008	0.891924	0.931285	0.890489	0.984979	0.914796	0.836026	0.835819	0.896501	0.830833	0.857372		0.268	0.662269	0.720886	0.685152	0.913181	0.74781	0.888432	0.91292	0.918713	0.863669	0.784978	0.673642	0.797411
0.269	0.800644	0.909749	0.888772	0.932448	0.89067	0.987141	0.913841	0.835352	0.835881	0.895392	0.829706	0.857574		0.269	0.658066	0.718676	0.683528	0.908425	0.742233	0.885822	0.913666	0.920693	0.863486	0.786458	0.671953	0.798099
0.27	0.797477	0.907081	0.885419	0.933186	0.890784	0.988628	0.912427	0.835019	0.836544	0.894259	0.828733	0.85791		0.27	0.655131	0.716175	0.682679	0.903481	0.736638	0.883019	0.914644	0.923027	0.864873	0.787176	0.669831	0.799051
0.271	0.794695	0.904146	0.882052	0.933393	0.890906	0.9894	0.910675	0.835052	0.837592	0.893348	0.82787	0.857802		0.271	0.653747	0.713419	0.682401	0.899273	0.731477	0.880505	0.915616	0.92549	0.867951	0.786874	0.667524	0.799935
0.272	0.792307	0.901189	0.878806	0.933242	0.890854	0.989499	0.908775	0.835585	0.838724	0.892801	0.827008	0.857288		0.272	0.65382	0.710521	0.68232	0.896391	0.727016	0.878518	0.916142	0.927638	0.87229	0.785642	0.665592	0.800655
0.273	0.789608	0.898417	0.875717	0.932866	0.890474	0.988944	0.907001	0.836406	0.839802	0.892759	0.826029	0.856531		0.273	0.654767	0.707637	0.682123	0.894608	0.723468	0.876778	0.916091	0.929146	0.87713	0.783854	0.664486	0.801455
0.274	0.786719	0.895806	0.872891	0.932437	0.889713	0.987988	0.905656	0.836923	0.840833	0.893181	0.824868	0.855566		0.274	0.656977	0.704931	0.681615	0.893349	0.721103	0.875208	0.915628	0.929694	0.881914	0.782121	0.6645	0.802637
0.275	0.784002	0.893169	0.87053	0.932308	0.888684	0.987111	0.904752	0.83676	0.841961	0.893697	0.823468	0.854355		0.275	0.660675	0.70249	0.680859	0.892507	0.719821	0.874142	0.915154	0.929841	0.886288	0.781165	0.665508	0.804021
0.276	0.781657	0.890492	0.868727	0.932884	0.887832	0.986895	0.904096	0.836176	0.842887	0.893951	0.82193	0.852818		0.276	0.664936	0.700229	0.679782	0.892518	0.719061	0.873539	0.91505	0.930666	0.890054	0.781338	0.666921	0.805386
0.277	0.779396	0.887574	0.867413	0.934217	0.887628	0.987467	0.903625	0.835539	0.843098	0.89366	0.820571	0.85106		0.277	0.668294	0.697927	0.677949	0.893145	0.71845	0.87262	0.915141	0.932486	0.893273	0.782441	0.668463	0.806789
0.278	0.776194	0.88426	0.866321	0.93607	0.887923	0.98851	0.903533	0.834828	0.842425	0.892722	0.819395	0.849261		0.278	0.668595	0.69535	0.675236	0.893673	0.717847	0.870929	0.91488	0.935167	0.896213	0.783675	0.670243	0.808335
0.279	0.771591	0.880694	0.865258	0.938157	0.887959	0.989869	0.90387	0.834076	0.840696	0.891381	0.818276	0.847442		0.279	0.665751	0.692352	0.671826	0.89348	0.717437	0.868628	0.914115	0.938151	0.898991	0.784577	0.672159	0.810081
0.28	0.765949	0.877105	0.864371	0.940201	0.887371	0.991584	0.904346	0.833455	0.837495	0.889953	0.817284	0.84559		0.28	0.661913	0.688895	0.667858	0.892129	0.717509	0.865791	0.91316	0.940365	0.901623	0.785142	0.673914	0.812141
0.281	0.760089	0.873924	0.863592	0.942168	0.886258	0.993635	0.904599	0.833023	0.833147	0.888603	0.816578	0.84364		0.281	0.658249	0.684919	0.663609	0.889665	0.718177	0.862344	0.912039	0.941803	0.904297	0.785457	0.675331	0.814564
0.282	0.755183	0.871564	0.862735	0.94424	0.88462	0.995564	0.904501	0.832809	0.828533	0.887424	0.816298	0.841699		0.282	0.654514	0.680417	0.659604	0.886505	0.719549	0.857998	0.910365	0.942969	0.907225	0.785525	0.676506	0.817031
0.283	0.751232	0.870124	0.861579	0.946372	0.882517	0.996923	0.90403	0.83292	0.824981	0.88662	0.816195	0.839982		0.283	0.650506	0.675689	0.656028	0.882872	0.721953	0.852894	0.908341	0.944144	0.910431	0.785237	0.677663	0.81896
0.284	0.747539	0.869449	0.859842	0.948225	0.8801	0.997576	0.903168	0.833398	0.823156	0.886396	0.815848	0.838483		0.284	0.646373	0.671191	0.652604	0.87888	0.72546	0.847506	0.906656	0.945888	0.913705	0.78477	0.679037	0.820214
0.285	0.74368	0.869102	0.857852	0.949392	0.877739	0.997639	0.902015	0.83406	0.823094	0.886677	0.815159	0.837052		0.285	0.64263	0.667076	0.649026	0.874908	0.729337	0.842263	0.905655	0.94817	0.916476	0.784223	0.680532	0.820981
0.286	0.739416	0.868717	0.856123	0.949638	0.875903	0.99723	0.900915	0.834618	0.824609	0.887202	0.814211	0.835474		0.286	0.639361	0.663221	0.645212	0.871396	0.732895	0.837613	0.90532	0.950439	0.91816	0.78355	0.681914	0.821611
0.287	0.734598	0.868083	0.855091	0.949136	0.874622	0.996534	0.90028	0.834914	0.827171	0.887867	0.813185	0.833476		0.287	0.636218	0.659583	0.641224	0.868551	0.736071	0.833839	0.905332	0.952436	0.918734	0.782831	0.683246	0.822445
0.288	0.729459	0.867063	0.85469	0.948275	0.873737	0.995864	0.900187	0.834815	0.83004	0.888714	0.812317	0.831015		0.288	0.63266	0.656119	0.63712	0.866628	0.73899	0.830782	0.905301	0.954163	0.91841	0.782215	0.68489	0.823546
0.289	0.724543	0.8657	0.854555	0.947159	0.873422	0.995458	0.900421	0.834451	0.832587	0.889675	0.811817	0.828308		0.289	0.628487	0.652727	0.632763	0.865679	0.741723	0.827835	0.905058	0.955649	0.917386	0.78206	0.68693	0.824683
0.29	0.720559	0.863956	0.854385	0.94624	0.873922	0.995283	0.90049	0.834204	0.83463	0.890687	0.811701	0.825564		0.29	0.624515	0.649221	0.628079	0.865252	0.74433	0.824516	0.904653	0.957159	0.916072	0.782557	0.689151	0.825515
0.291	0.718219	0.861939	0.853872	0.946293	0.875101	0.995186	0.90023	0.834389	0.836272	0.891735	0.811844	0.822923		0.291	0.621647	0.645382	0.623366	0.864802	0.746868	0.820785	0.904503	0.95885	0.914981	0.783592	0.691452	0.825838
0.292	0.717259	0.85994	0.852771	0.947478	0.876294	0.995045	0.899698	0.835097	0.837514	0.892812	0.812112	0.820273		0.292	0.620141	0.641111	0.618804	0.864108	0.749285	0.816831	0.904776	0.960438	0.914471	0.784863	0.693804	0.825796
0.293	0.716698	0.858174	0.85107	0.949417	0.876938	0.9947	0.898979	0.836043	0.838626	0.893737	0.812148	0.81729		0.293	0.619533	0.636652	0.614288	0.863203	0.751745	0.812607	0.904879	0.961431	0.914774	0.786018	0.695978	0.825716
0.294	0.715969	0.856639	0.848901	0.951908	0.876838	0.99395	0.898131	0.836766	0.840333	0.894149	0.811452	0.814045		0.294	0.619005	0.632283	0.609573	0.861872	0.754654	0.807889	0.903848	0.961339	0.916087	0.786525	0.697813	0.826062
0.295	0.715246	0.855219	0.846386	0.954868	0.875954	0.992771	0.897077	0.837182	0.843164	0.893976	0.810084	0.810977		0.295	0.617743	0.628101	0.60464	0.859797	0.758141	0.802639	0.90224	0.960529	0.918504	0.786319	0.699436	0.827142
0.296	0.715165	0.853791	0.843849	0.958142	0.874523	0.991329	0.895859	0.837589	0.846786	0.893472	0.808672	0.80837		0.296	0.615516	0.62404	0.599789	0.857182	0.761883	0.797	0.900753	0.960076	0.92224	0.785798	0.701187	0.828627
0.297	0.715339	0.852297	0.841682	0.961581	0.87298	0.989777	0.894702	0.838025	0.8506	0.89298	0.807464	0.806053		0.297	0.61272	0.61992	0.595215	0.854765	0.765671	0.791088	0.899863	0.960327	0.927116	0.785048	0.703193	0.830084
0.298	0.714725	0.850642	0.840109	0.964748	0.871682	0.988269	0.893869	0.838333	0.854099	0.892652	0.806306	0.803793		0.298	0.609819	0.61555	0.590734	0.85283	0.769618	0.784971	0.899622	0.960622	0.932415	0.783708	0.705303	0.831454
0.299	0.712763	0.848716	0.839195	0.96692	0.870753	0.986878	0.893568	0.838264	0.856983	0.89246	0.804989	0.801536		0.299	0.607071	0.610937	0.585926	0.851208	0.77382	0.778688	0.899785	0.96079	0.937298	0.781261	0.70749	0.832671
0.3	0.709653	0.846537	0.838923	0.967933	0.870187	0.985593	0.893938	0.837807	0.859358	0.892524	0.803559	0.799235		0.3	0.604769	0.606171	0.580623	0.849587	0.778146	0.772297	0.899939	0.960901	0.940837	0.777904	0.709872	0.833441
0.301	0.706092	0.844264	0.839081	0.96817	0.869765	0.984299	0.89486	0.836939	0.861769	0.89314	0.802119	0.796923		0.301	0.602961	0.601372	0.57495	0.847957	0.782508	0.765972	0.899725	0.960918	0.942503	0.774392	0.712464	0.833852
0.302	0.703055	0.841933	0.839525	0.968061	0.869278	0.982931	0.896004	0.835358	0.864563	0.894148	0.800704	0.794675		0.302	0.60138	0.596717	0.56922	0.845947	0.787002	0.75981	0.89902	0.960763	0.942208	0.771307	0.714934	0.834176
0.303	0.701298	0.839439	0.840056	0.967767	0.868758	0.981439	0.897137	0.8332	0.867997	0.894983	0.799423	0.792542		0.303	0.599235	0.592153	0.563836	0.842956	0.791619	0.75377	0.897744	0.960412	0.940432	0.768888	0.716801	0.834433
0.304	0.700871	0.836686	0.840484	0.967569	0.868175	0.980026	0.89798	0.831088	0.872278	0.895085	0.798345	0.790668		0.304	0.595587	0.587567	0.558863	0.839005	0.796114	0.747866	0.895953	0.960164	0.937964	0.767096	0.717998	0.83478
0.305	0.700911	0.833876	0.840612	0.967818	0.867381	0.978993	0.898172	0.829635	0.877318	0.894305	0.797468	0.789005		0.305	0.589521	0.582869	0.554103	0.834351	0.800077	0.742194	0.893844	0.960292	0.935135	0.765729	0.718759	0.835251
0.306	0.700539	0.831354	0.8402	0.968444	0.866275	0.978441	0.897584	0.829016	0.882526	0.892957	0.796808	0.787197		0.306	0.581282	0.578006	0.549265	0.828818	0.803335	0.736666	0.891358	0.960039	0.932523	0.764474	0.719269	0.835667
0.307	0.698968	0.828997	0.838962	0.969134	0.864919	0.978382	0.89622	0.828815	0.88715	0.891499	0.796376	0.785109		0.307	0.57188	0.573041	0.544423	0.822126	0.80614	0.731211	0.88842	0.958633	0.931205	0.763292	0.719738	0.83569
0.308	0.695834	0.826677	0.836916	0.969524	0.863384	0.978696	0.894195	0.828536	0.89055	0.89036	0.796046	0.782731		0.308	0.562481	0.568044	0.540095	0.814822	0.808601	0.72612	0.885334	0.95618	0.931528	0.762305	0.720102	0.835174
0.309	0.692157	0.824426	0.83453	0.969567	0.861914	0.978983	0.891764	0.828003	0.892394	0.88971	0.79571	0.780187		0.309	0.554255	0.563116	0.536421	0.807532	0.810723	0.721288	0.882625	0.953033	0.932786	0.762039	0.720201	0.834337
0.31	0.68959	0.822113	0.832276	0.969367	0.860971	0.978503	0.889191	0.82724	0.893055	0.889397	0.795347	0.777703		0.31	0.547708	0.558447	0.533025	0.800168	0.812273	0.71612	0.880513	0.949655	0.934628	0.762773	0.720205	0.833364
0.311	0.688318	0.81972	0.830435	0.968825	0.860658	0.977022	0.886848	0.826476	0.893171	0.889228	0.795042	0.775482		0.311	0.542404	0.554199	0.529548	0.792829	0.81281	0.710322	0.878707	0.9468	0.93722	0.764534	0.720457	0.832247
0.312	0.687423	0.817124	0.829144	0.967767	0.860911	0.974997	0.885098	0.825906	0.893311	0.888953	0.794859	0.773642		0.312	0.537434	0.550354	0.525917	0.785966	0.812163	0.703893	0.876727	0.944659	0.940591	0.766836	0.721131	0.830853
0.313	0.68654	0.813966	0.828283	0.96596	0.861807	0.97303	0.884053	0.825423	0.893974	0.888244	0.794666	0.772113		0.313	0.532055	0.546763	0.522074	0.779767	0.810425	0.697242	0.874305	0.942927	0.944635	0.768731	0.722017	0.829439
0.314	0.686038	0.810178	0.827454	0.963113	0.863177	0.971418	0.883657	0.824751	0.895405	0.886842	0.79426	0.770787		0.314	0.526378	0.543086	0.517864	0.774157	0.807584	0.690699	0.871478	0.941411	0.949134	0.76922	0.722993	0.828536
0.315	0.686065	0.805962	0.826242	0.959395	0.864578	0.970271	0.88374	0.823841	0.89707	0.884717	0.793594	0.769622		0.315	0.520889	0.539008	0.513319	0.768427	0.803995	0.684505	0.868439	0.93964	0.953595	0.768283	0.724224	0.828306
0.316	0.686302	0.801548	0.824359	0.955663	0.865696	0.969569	0.884178	0.822903	0.898447	0.882144	0.792732	0.768594		0.316	0.515661	0.534537	0.50863	0.762129	0.800421	0.67885	0.8648	0.937348	0.957362	0.767024	0.725776	0.828664
0.317	0.686211	0.797006	0.821841	0.95288	0.866458	0.969331	0.884594	0.822182	0.899397	0.879524	0.791793	0.767757		0.317	0.510793	0.529784	0.503936	0.755546	0.797088	0.67354	0.860409	0.935073	0.960039	0.766226	0.727546	0.829352
0.318	0.685577	0.792429	0.818941	0.951236	0.866856	0.969487	0.884581	0.82191	0.900166	0.877121	0.791013	0.767143		0.318	0.506771	0.52486	0.499348	0.748767	0.793834	0.668334	0.855536	0.933358	0.96149	0.765873	0.729501	0.829824
0.319	0.684342	0.788089	0.81588	0.950226	0.866817	0.969874	0.884044	0.822298	0.900916	0.875095	0.790477	0.766471		0.319	0.504046	0.519874	0.494954	0.741215	0.790599	0.66312	0.85066	0.931918	0.961819	0.764997	0.731553	0.829863
0.32	0.68258	0.78417	0.81284	0.949592	0.8662	0.97002	0.883182	0.823085	0.901811	0.873492	0.790089	0.765521		0.32	0.50279	0.515007	0.490806	0.732285	0.787428	0.658059	0.846046	0.93002	0.961423	0.763235	0.73376	0.829642
0.321	0.680715	0.780617	0.810003	0.949186	0.864958	0.969434	0.882313	0.823609	0.902581	0.872147	0.78969	0.764444		0.321	0.502203	0.510493	0.48679	0.722244	0.784394	0.653235	0.841762	0.927157	0.960712	0.761385	0.736247	0.829523
0.322	0.679053	0.777098	0.807643	0.948617	0.863294	0.968079	0.881421	0.8235	0.902662	0.870849	0.789204	0.763444		0.322	0.501448	0.506394	0.482595	0.711887	0.781417	0.648361	0.837694	0.923447	0.959949	0.760017	0.738797	0.829773
0.323	0.677438	0.773398	0.80597	0.947568	0.861672	0.966213	0.880503	0.822909	0.90165	0.86952	0.78856	0.762717		0.323	0.500441	0.502602	0.478023	0.701544	0.778294	0.643066	0.833903	0.919563	0.959335	0.759201	0.741331	0.830516
0.324	0.675241	0.769528	0.805127	0.945866	0.860469	0.964049	0.879781	0.822283	0.899546	0.868179	0.787703	0.762437		0.324	0.499234	0.498889	0.473137	0.691251	0.774742	0.637225	0.830446	0.91608	0.95884	0.758434	0.744056	0.831832
0.325	0.671974	0.76552	0.80506	0.943312	0.859968	0.96169	0.879479	0.822101	0.896751	0.867031	0.786845	0.76266		0.325	0.497891	0.495157	0.468173	0.681156	0.770555	0.630931	0.82699	0.913041	0.958197	0.757569	0.746826	0.833602
0.326	0.667406	0.761467	0.805588	0.939744	0.860359	0.959086	0.879757	0.822413	0.893643	0.866068	0.786057	0.763302		0.326	0.496514	0.491363	0.463064	0.671567	0.765927	0.62431	0.822623	0.909959	0.957127	0.757135	0.749362	0.835491
0.327	0.661564	0.757438	0.806401	0.935063	0.861585	0.956349	0.880728	0.822949	0.890729	0.865142	0.785335	0.764233		0.327	0.494705	0.487418	0.457491	0.662644	0.76102	0.617629	0.816789	0.906441	0.955287	0.757317	0.751451	0.837362
0.328	0.654906	0.753376	0.807053	0.929548	0.863451	0.9538	0.882157	0.823548	0.888561	0.864136	0.784848	0.765453		0.328	0.491833	0.483264	0.451488	0.653981	0.755451	0.611285	0.809789	0.902765	0.952646	0.757765	0.753028	0.839173
0.329	0.648157	0.749268	0.807112	0.924048	0.865612	0.951616	0.883513	0.824156	0.887462	0.862954	0.784661	0.76696		0.329	0.487666	0.478958	0.445402	0.645168	0.748891	0.605576	0.802115	0.899603	0.949524	0.757991	0.75425	0.840652
0.33	0.642166	0.745301	0.806175	0.919322	0.867665	0.949905	0.884319	0.824877	0.887233	0.861585	0.784799	0.768471		0.33	0.482688	0.474448	0.439739	0.636158	0.741398	0.600574	0.794037	0.89735	0.946233	0.758015	0.755324	0.841747
0.331	0.637391	0.741581	0.803704	0.915657	0.869341	0.948813	0.884227	0.825484	0.887156	0.859952	0.785101	0.769683		0.331	0.477495	0.469652	0.434785	0.627115	0.733375	0.596088	0.785924	0.895383	0.943078	0.758191	0.756259	0.842959
0.332	0.633796	0.738046	0.799812	0.913022	0.870575	0.948543	0.883263	0.826193	0.886502	0.857937	0.785352	0.770497		0.332	0.472226	0.464611	0.430349	0.618013	0.725182	0.591778	0.77824	0.893261	0.940211	0.758742	0.756987	0.844589
0.333	0.63093	0.734517	0.795193	0.911163	0.871391	0.949227	0.881675	0.827558	0.884779	0.855895	0.785283	0.771104		0.333	0.467151	0.459472	0.426009	0.608883	0.716901	0.587278	0.771283	0.890697	0.937722	0.759746	0.757835	0.846358
0.334	0.628076	0.730791	0.790389	0.909807	0.871908	0.95068	0.879738	0.829597	0.881788	0.854426	0.784771	0.77157		0.334	0.462742	0.4545	0.421379	0.599973	0.708499	0.582276	0.765164	0.887494	0.93578	0.761337	0.759123	0.847662
0.335	0.62495	0.726953	0.785702	0.908436	0.87234	0.952276	0.877833	0.831638	0.877612	0.85359	0.783967	0.771804		0.335	0.459412	0.449873	0.416327	0.591502	0.699824	0.576594	0.759756	0.883325	0.934473	0.763378	0.760585	0.847973
0.336	0.621832	0.723085	0.781165	0.906395	0.872824	0.953444	0.876538	0.833262	0.872617	0.853328	0.783037	0.772054		0.336	0.456925	0.445573	0.411025	0.583631	0.691042	0.570133	0.754724	0.878205	0.933809	0.765503	0.761886	0.847514
0.337	0.619063	0.719157	0.777027	0.903362	0.87329	0.953969	0.876404	0.834474	0.867284	0.853584	0.781865	0.772867		0.337	0.454673	0.44146	0.4057	0.576362	0.682477	0.563029	0.749839	0.872999	0.933313	0.767309	0.763008	0.846924
0.338	0.616817	0.715413	0.773692	0.899253	0.873673	0.953697	0.877742	0.83538	0.862334	0.854214	0.780284	0.774357		0.338	0.452033	0.437348	0.400478	0.569291	0.674064	0.555525	0.744877	0.868269	0.932031	0.768417	0.764044	0.846471
0.339	0.615407	0.712001	0.771232	0.894513	0.874228	0.952587	0.880231	0.836189	0.858547	0.855092	0.778466	0.776266		0.339	0.448561	0.433078	0.395249	0.561947	0.665447	0.547815	0.739479	0.863749	0.929578	0.768718	0.765097	0.846205
0.34	0.614226	0.708797	0.769286	0.889848	0.875285	0.950804	0.883048	0.83689	0.856332	0.85611	0.776517	0.778331		0.34	0.444332	0.428562	0.389753	0.554311	0.656431	0.540226	0.733273	0.859254	0.926518	0.768126	0.766159	0.846057
0.341	0.611369	0.705736	0.767376	0.885634	0.877089	0.948883	0.88543	0.837414	0.855574	0.857123	0.774384	0.780327		0.341	0.439558	0.423762	0.383966	0.546777	0.647218	0.533174	0.726233	0.855064	0.923091	0.766623	0.767186	0.846097
0.342	0.606327	0.702842	0.76504	0.882013	0.879718	0.947157	0.886764	0.837564	0.856253	0.857751	0.77191	0.781924		0.342	0.4348	0.41873	0.378166	0.539622	0.638338	0.526978	0.718787	0.851358	0.919034	0.764152	0.768098	0.846397
0.343	0.60014	0.700159	0.761973	0.878998	0.882915	0.945341	0.886893	0.837059	0.858183	0.857827	0.769083	0.78297		0.343	0.430621	0.41359	0.372604	0.5328	0.630136	0.521746	0.711404	0.847988	0.913991	0.760813	0.768897	0.847096
0.344	0.593859	0.697728	0.758341	0.876564	0.886162	0.943087	0.886005	0.836226	0.860527	0.857535	0.766081	0.783619		0.344	0.42738	0.408488	0.367476	0.526107	0.622603	0.517255	0.704472	0.844595	0.907577	0.756967	0.769809	0.84814
0.345	0.58803	0.69534	0.754753	0.874761	0.889015	0.940338	0.884451	0.835872	0.862646	0.857121	0.763118	0.784145		0.345	0.424488	0.403516	0.362887	0.519412	0.61566	0.513071	0.697835	0.840726	0.899566	0.753576	0.771037	0.84907
0.346	0.583	0.692717	0.751669	0.873122	0.89126	0.937225	0.882484	0.836298	0.864484	0.856856	0.760378	0.784852		0.346	0.421737	0.39872	0.358682	0.512897	0.609134	0.508758	0.691035	0.836194	0.890524	0.750868	0.772304	0.849297
0.347	0.57903	0.689716	0.749179	0.870982	0.892841	0.933979	0.880332	0.837217	0.865775	0.856976	0.757983	0.78591		0.347	0.420163	0.394143	0.354648	0.506571	0.602961	0.504068	0.684259	0.831083	0.881761	0.748224	0.773215	0.848493
0.348	0.576471	0.686489	0.747168	0.86821	0.893871	0.930741	0.878504	0.838258	0.866181	0.857565	0.755905	0.787369		0.348	0.420422	0.389789	0.350641	0.50004	0.597183	0.498926	0.677604	0.825393	0.874022	0.74536	0.773755	0.846908
0.349	0.575252	0.683346	0.745543	0.864954	0.894539	0.927697	0.877515	0.839093	0.865548	0.858611	0.75397	0.789321		0.349	0.421279	0.385581	0.346603	0.49318	0.591517	0.493342	0.671155	0.818975	0.867511	0.742244	0.77395	0.845001
0.35	0.575236	0.680323	0.744203	0.861299	0.895115	0.924911	0.87753	0.839636	0.864029	0.86001	0.752055	0.791807		0.35	0.421052	0.38139	0.342418	0.486348	0.58535	0.487457	0.664848	0.812094	0.862175	0.739522	0.773702	0.842869
0.351	0.576086	0.677237	0.743016	0.856969	0.895876	0.922536	0.878474	0.840121	0.861783	0.861698	0.750069	0.794496		0.351	0.418864	0.377043	0.337954	0.480134	0.578348	0.481407	0.658432	0.80552	0.857882	0.737094	0.772715	0.840316
0.352	0.576651	0.67408	0.741731	0.851861	0.897024	0.920787	0.880079	0.840771	0.859269	0.86339	0.748127	0.796967		0.352	0.414715	0.372411	0.333324	0.474672	0.570664	0.47531	0.65169	0.799728	0.854291	0.733991	0.770901	0.837463
0.353	0.575591	0.670965	0.740029	0.846317	0.898573	0.919464	0.881993	0.841494	0.857413	0.864607	0.746241	0.798887		0.353	0.409474	0.367592	0.328758	0.46965	0.562444	0.469258	0.644443	0.794554	0.850883	0.729928	0.768722	0.834711
0.354	0.572326	0.667929	0.737862	0.84063	0.900402	0.918317	0.883873	0.841996	0.857027	0.86506	0.744285	0.800119		0.354	0.403314	0.362816	0.324322	0.464708	0.553831	0.463212	0.636575	0.789553	0.847088	0.725058	0.766563	0.832186
0.355	0.566994	0.664797	0.735326	0.835012	0.90235	0.917471	0.885289	0.842267	0.858355	0.864738	0.742475	0.800675		0.355	0.396514	0.35816	0.320056	0.45947	0.545107	0.457219	0.628278	0.784158	0.842633	0.719848	0.764549	0.829672
0.356	0.560036	0.661318	0.732462	0.829825	0.90414	0.917142	0.886062	0.842642	0.860831	0.86385	0.740913	0.80077		0.356	0.39001	0.353572	0.31601	0.454076	0.53647	0.451401	0.620134	0.778256	0.837501	0.714522	0.762695	0.826781
0.357	0.552197	0.657432	0.729317	0.825371	0.905369	0.917402	0.886224	0.843471	0.863675	0.862747	0.739411	0.800556		0.357	0.384703	0.349058	0.312238	0.448835	0.527942	0.445837	0.61294	0.772549	0.831602	0.708843	0.760691	0.823167
0.358	0.544169	0.653158	0.725919	0.821816	0.905709	0.917863	0.88581	0.844888	0.866132	0.861824	0.737866	0.800067		0.358	0.380939	0.344708	0.308743	0.443674	0.51975	0.440469	0.606815	0.767427	0.825153	0.702829	0.758566	0.818949
0.359	0.536491	0.648623	0.722312	0.818872	0.905203	0.918033	0.885005	0.846812	0.86753	0.861452	0.736255	0.799329		0.359	0.378723	0.340588	0.305338	0.43857	0.512234	0.435092	0.60113	0.762247	0.818798	0.696922	0.756695	0.814505
0.36	0.52963	0.644067	0.718653	0.815851	0.904175	0.917668	0.88429	0.849028	0.867458	0.861739	0.734686	0.798315		0.36	0.377789	0.336677	0.301856	0.433761	0.5054	0.429604	0.595447	0.756261	0.81299	0.691831	0.755122	0.809764
0.361	0.523711	0.639561	0.715354	0.812335	0.903072	0.916762	0.884084	0.851312	0.866124	0.862569	0.733395	0.797083		0.361	0.377275	0.332959	0.298242	0.42937	0.499072	0.423884	0.589649	0.749052	0.80786	0.687762	0.753567	0.804531
0.362	0.518872	0.635023	0.712955	0.808142	0.902274	0.915298	0.884693	0.853798	0.864239	0.863841	0.73248	0.795846		0.362	0.375789	0.329475	0.294395	0.425381	0.492824	0.417925	0.583636	0.741148	0.803412	0.684396	0.751846	0.798896
0.363	0.515241	0.630355	0.711466	0.803323	0.902107	0.913008	0.886147	0.856361	0.862211	0.865353	0.732023	0.794778		0.363	0.372762	0.326213	0.290289	0.421674	0.486182	0.41189	0.577273	0.733132	0.799422	0.681312	0.750107	0.792957
0.364	0.512995	0.625688	0.710407	0.798104	0.902759	0.909796	0.888223	0.858691	0.860333	0.8668	0.732252	0.793824		0.364	0.368439	0.323003	0.286078	0.418206	0.479048	0.405966	0.570673	0.725584	0.79546	0.678069	0.748405	0.786999
0.365	0.51186	0.621406	0.70977	0.79269	0.904028	0.905997	0.890451	0.860603	0.85907	0.86795	0.733136	0.792965		0.365	0.363395	0.319659	0.281844	0.414806	0.471567	0.400286	0.564126	0.718931	0.791197	0.674143	0.746688	0.781716
0.366	0.510758	0.617611	0.709438	0.787422	0.905468	0.902236	0.89238	0.862207	0.858791	0.868845	0.734278	0.792299		0.366	0.358158	0.316029	0.277634	0.411069	0.463935	0.394904	0.557649	0.713358	0.786468	0.669277	0.744919	0.777473
0.367	0.508902	0.614108	0.709179	0.782643	0.906654	0.898946	0.893588	0.863589	0.859456	0.869431	0.735483	0.791759		0.367	0.353088	0.312079	0.273493	0.406912	0.45616	0.389833	0.550939	0.708738	0.781235	0.663611	0.743098	0.77396
0.368	0.506077	0.610739	0.708774	0.778564	0.90733	0.8962	0.893659	0.864998	0.861152	0.869706	0.736855	0.791151		0.368	0.34843	0.30797	0.269372	0.402535	0.448195	0.384938	0.543912	0.704354	0.775261	0.65752	0.741293	0.770626
0.369	0.502244	0.607297	0.707945	0.775225	0.907223	0.893927	0.892421	0.866924	0.863968	0.869895	0.738534	0.790576		0.369	0.34453	0.303855	0.26515	0.398031	0.440358	0.380085	0.536839	0.699404	0.768349	0.651518	0.739548	0.767333
0.37	0.49732	0.603613	0.706378	0.77214	0.906095	0.892098	0.890486	0.869434	0.867705	0.870189	0.740519	0.790302		0.37	0.341638	0.299897	0.260877	0.393274	0.433215	0.375174	0.529995	0.693934	0.760428	0.646003	0.737773	0.763918
0.371	0.491548	0.599733	0.704013	0.768529	0.903911	0.890628	0.88874	0.872334	0.871764	0.870697	0.742837	0.790486		0.371	0.339603	0.296189	0.256783	0.388308	0.427049	0.370074	0.523565	0.688259	0.751671	0.641145	0.735782	0.760081
0.372	0.486201	0.595728	0.701175	0.763902	0.900716	0.889229	0.887697	0.875502	0.875676	0.87162	0.745413	0.791061		0.372	0.338063	0.292747	0.252962	0.383386	0.421714	0.364673	0.517418	0.682201	0.742621	0.636694	0.733445	0.755523
0.373	0.482311	0.591425	0.698291	0.758159	0.896696	0.887526	0.887558	0.879117	0.878806	0.873228	0.748155	0.791985		0.373	0.336388	0.289494	0.249306	0.378464	0.416756	0.358907	0.511226	0.675566	0.733573	0.632282	0.73072	0.750103
0.374	0.479929	0.586571	0.695814	0.751491	0.892121	0.885468	0.888019	0.883343	0.880778	0.875483	0.751073	0.793081		0.374	0.334247	0.286362	0.245591	0.373413	0.411686	0.352883	0.505013	0.668518	0.724748	0.62795	0.727496	0.7439
0.375	0.478554	0.581229	0.693844	0.744229	0.887273	0.883394	0.888751	0.887898	0.881572	0.878029	0.754117	0.794224		0.375	0.331771	0.28332	0.241693	0.368295	0.406322	0.34689	0.498831	0.661237	0.716645	0.623997	0.723722	0.737141
0.376	0.477557	0.575673	0.692106	0.736821	0.882504	0.881666	0.889537	0.89221	0.881098	0.880468	0.757244	0.795376		0.376	0.329503	0.2804	0.237619	0.363217	0.400624	0.341232	0.492762	0.653977	0.709988	0.620449	0.719336	0.730211
0.377	0.476351	0.570144	0.690313	0.72996	0.878065	0.880334	0.890233	0.896074	0.879438	0.882484	0.760558	0.79631		0.377	0.327241	0.27757	0.233525	0.358361	0.394565	0.336018	0.486959	0.647217	0.705008	0.617134	0.714519	0.723644
0.378	0.474629	0.564918	0.688246	0.724134	0.873812	0.879273	0.890725	0.899615	0.877188	0.883721	0.764255	0.796846		0.378	0.323797	0.274718	0.229597	0.353764	0.38795	0.33117	0.481446	0.64131	0.701127	0.613805	0.709784	0.717928
0.379	0.472339	0.560108	0.685789	0.719229	0.869573	0.878409	0.890744	0.902857	0.875197	0.883968	0.768487	0.796959		0.379	0.318475	0.271779	0.225893	0.34926	0.38065	0.326656	0.476073	0.636031	0.697492	0.610479	0.705381	0.713132
0.38	0.469372	0.555512	0.682904	0.714898	0.865493	0.877492	0.890061	0.905983	0.873827	0.88337	0.773104	0.796554		0.38	0.312407	0.268733	0.222314	0.344733	0.372936	0.322431	0.47075	0.630914	0.693428	0.607403	0.701299	0.70914
0.381	0.465059	0.550926	0.679767	0.711002	0.861594	0.876254	0.888756	0.909144	0.873324	0.882332	0.777875	0.795682		0.381	0.307287	0.265653	0.218862	0.340084	0.365544	0.318386	0.465611	0.625637	0.688536	0.604802	0.69757	0.705895
0.382	0.458731	0.546288	0.676676	0.707597	0.857745	0.874425	0.886959	0.912379	0.873908	0.881297	0.782754	0.794726		0.382	0.303359	0.262658	0.215532	0.335147	0.358943	0.314378	0.460794	0.620001	0.682551	0.602861	0.694116	0.703504
0.383	0.450833	0.541605	0.673782	0.704358	0.853834	0.871752	0.884875	0.91569	0.875415	0.880825	0.787741	0.794081		0.383	0.300291	0.259812	0.212229	0.329917	0.353045	0.310327	0.456165	0.614009	0.675567	0.601534	0.690736	0.701704
0.384	0.442772	0.53683	0.671024	0.700618	0.849853	0.868489	0.882773	0.919208	0.877286	0.881374	0.792769	0.794015		0.384	0.297663	0.257084	0.2089	0.324519	0.347776	0.306194	0.451557	0.607719	0.667854	0.600296	0.687235	0.699514
0.385	0.435846	0.531897	0.668259	0.695871	0.845842	0.86477	0.880863	0.923186	0.879306	0.883027	0.79773	0.794588		0.385	0.295663	0.254324	0.205581	0.319272	0.343072	0.302038	0.447084	0.601124	0.659814	0.598613	0.683406	0.696306
0.386	0.431036	0.526961	0.665338	0.690151	0.841794	0.860365	0.879216	0.92758	0.88137	0.885518	0.802437	0.795658		0.386	0.294511	0.251495	0.20223	0.314587	0.338739	0.297852	0.442757	0.59451	0.651721	0.596258	0.679128	0.692173
0.387	0.428547	0.522252	0.66243	0.683809	0.837519	0.855176	0.877599	0.931881	0.883499	0.888284	0.806814	0.796954		0.387	0.293934	0.248546	0.198731	0.31044	0.334418	0.293606	0.438335	0.588262	0.643764	0.59318	0.674578	0.687734
0.388	0.427871	0.517793	0.659577	0.677058	0.832903	0.849346	0.875637	0.935552	0.885681	0.890701	0.811007	0.79844		0.388	0.293882	0.245492	0.195078	0.306458	0.329694	0.289359	0.433653	0.582425	0.636147	0.589424	0.670269	0.683953
0.389	0.428629	0.513612	0.656638	0.670056	0.828097	0.843265	0.873178	0.938374	0.887809	0.892267	0.81502	0.800296		0.389	0.294184	0.242514	0.19138	0.30247	0.324334	0.285162	0.42869	0.577084	0.628711	0.585158	0.66633	0.680892
0.39	0.430421	0.509722	0.653668	0.662902	0.82302	0.83722	0.870285	0.940542	0.889522	0.892757	0.818692	0.802577		0.39	0.293798	0.239667	0.187801	0.29851	0.318426	0.281054	0.423413	0.57241	0.620917	0.580662	0.662351	0.677724
0.391	0.432227	0.505994	0.650788	0.655843	0.817453	0.831427	0.866799	0.942419	0.8907	0.892419	0.821958	0.805236		0.391	0.292291	0.236864	0.184443	0.294583	0.312215	0.277074	0.417903	0.56825	0.612559	0.576218	0.658237	0.674446
0.392	0.433199	0.502179	0.647927	0.649255	0.811349	0.825798	0.862561	0.943938	0.891458	0.891738	0.824854	0.808235		0.392	0.29048	0.234011	0.181305	0.290695	0.305899	0.273317	0.412483	0.564348	0.603768	0.571993	0.65436	0.671562
0.393	0.432796	0.498061	0.645033	0.643341	0.804772	0.820053	0.857757	0.944714	0.892038	0.891019	0.827487	0.811489		0.393	0.289542	0.231004	0.178338	0.286834	0.29972	0.269784	0.407372	0.560478	0.594704	0.568078	0.65094	0.669041
0.394	0.430703	0.493715	0.64199	0.637971	0.797602	0.814306	0.852868	0.945073	0.892654	0.890415	0.829947	0.814954		0.394	0.289975	0.227905	0.175477	0.282909	0.293901	0.266372	0.402622	0.557039	0.585481	0.56446	0.647792	0.666714
0.395	0.426765	0.489321	0.638566	0.632882	0.789723	0.808665	0.848175	0.945409	0.89361	0.890024	0.832288	0.818518		0.395	0.29113	0.224907	0.172677	0.278672	0.288471	0.263022	0.398116	0.55407	0.576138	0.560914	0.644606	0.664543
0.396	0.421271	0.484782	0.634319	0.627668	0.781342	0.803051	0.843852	0.94606	0.894965	0.889951	0.83455	0.82197		0.396	0.292038	0.222069	0.169974	0.274013	0.283478	0.259669	0.393686	0.551141	0.566648	0.557286	0.641232	0.662368
0.397	0.415245	0.479944	0.629229	0.621892	0.772847	0.797328	0.840085	0.94725	0.896655	0.890291	0.836834	0.825071		0.397	0.291888	0.219385	0.167442	0.269257	0.279178	0.256268	0.38921	0.547745	0.557113	0.553631	0.637842	0.660101
0.398	0.40943	0.47483	0.62375	0.615351	0.764544	0.791251	0.836956	0.949045	0.898417	0.891043	0.839181	0.827834		0.398	0.290764	0.216892	0.165058	0.264665	0.275628	0.252791	0.384756	0.543538	0.547647	0.54994	0.634577	0.657601
0.399	0.404277	0.469612	0.618233	0.608023	0.756512	0.784776	0.834184	0.951087	0.899877	0.891951	0.841636	0.830409		0.399	0.289064	0.214577	0.162759	0.260275	0.272555	0.249303	0.380385	0.538747	0.53844	0.546057	0.631463	0.654662
0.4	0.400457	0.46452	0.612799	0.600108	0.74883	0.778213	0.831374	0.952695	0.900702	0.89255	0.844138	0.832693		0.4	0.286882	0.21247	0.160533	0.256294	0.269551	0.245839	0.376137	0.533941	0.529654	0.541815	0.628579	0.65118
0.401	0.398294	0.459545	0.607409	0.591994	0.741476	0.771731	0.828082	0.953536	0.900678	0.892532	0.846464	0.834626		0.401	0.284244	0.210459	0.15839	0.252949	0.266233	0.242409	0.372145	0.52929	0.521499	0.537089	0.625998	0.647062
0.402	0.397485	0.454568	0.602056	0.584031	0.734221	0.765419	0.824123	0.9536	0.899837	0.891809	0.84838	0.836323		0.402	0.28114	0.208322	0.156307	0.250102	0.262375	0.239057	0.368396	0.524585	0.513856	0.532056	0.623722	0.642337
0.403	0.39717	0.449582	0.596776	0.576511	0.726987	0.759398	0.819542	0.952951	0.898327	0.890312	0.849913	0.837978		0.403	0.277672	0.206022	0.154229	0.247252	0.257946	0.235783	0.364802	0.519962	0.506276	0.526995	0.621662	0.637366
0.404	0.396411	0.444643	0.591503	0.569518	0.719825	0.753616	0.814488	0.951611	0.896455	0.888272	0.851236	0.839683		0.404	0.274017	0.20371	0.152108	0.244309	0.25307	0.232515	0.361317	0.515833	0.498598	0.52198	0.619667	0.632691
0.405	0.394748	0.4398	0.586048	0.562932	0.712631	0.747847	0.80928	0.949777	0.89455	0.886298	0.852427	0.841425		0.405	0.270628	0.201486	0.149912	0.241594	0.247963	0.229158	0.357899	0.512201	0.490917	0.517123	0.617669	0.628766
0.406	0.391929	0.43493	0.580142	0.556594	0.705213	0.741748	0.804051	0.947747	0.893354	0.885122	0.853609	0.8431		0.406	0.267957	0.199337	0.147639	0.239138	0.242681	0.225744	0.354579	0.50885	0.483101	0.512526	0.615491	0.625371
0.407	0.387783	0.429993	0.573754	0.550232	0.697507	0.73496	0.798836	0.945661	0.893625	0.884957	0.85498	0.844591		0.407	0.265838	0.197204	0.145382	0.23661	0.237313	0.222393	0.35143	0.505563	0.474908	0.508153	0.612999	0.621865
0.408	0.382603	0.425153	0.567084	0.543596	0.689612	0.727404	0.793676	0.943497	0.895667	0.88516	0.856502	0.845827		0.408	0.263875	0.195111	0.143215	0.23375	0.232133	0.219132	0.348333	0.501873	0.466255	0.503943	0.610448	0.617961
0.409	0.377054	0.420435	0.560276	0.536658	0.68177	0.719142	0.788452	0.941174	0.899204	0.885216	0.857898	0.846722		0.409	0.262106	0.193107	0.141145	0.230741	0.227498	0.215884	0.345112	0.497248	0.457308	0.499957	0.60833	0.613505
0.41	0.371552	0.415709	0.553486	0.529397	0.674007	0.710111	0.783124	0.938839	0.903385	0.885086	0.858905	0.847206		0.41	0.260776	0.191202	0.13912	0.227827	0.22361	0.212581	0.341839	0.491709	0.448511	0.496105	0.60692	0.608533
0.411	0.36662	0.410826	0.546813	0.521744	0.666128	0.700387	0.777712	0.936529	0.907387	0.884593	0.85944	0.84741		0.411	0.260132	0.18944	0.137048	0.224892	0.220518	0.209226	0.33856	0.48573	0.440214	0.492263	0.606267	0.603295
0.412	0.362929	0.405786	0.540212	0.513748	0.658164	0.690191	0.772146	0.934037	0.910262	0.883471	0.859497	0.847584		0.412	0.260063	0.18776	0.134865	0.221931	0.218055	0.20585	0.335087	0.479686	0.432633	0.488304	0.606246	0.59797
0.413	0.360967	0.400721	0.53346	0.505591	0.650106	0.679892	0.766422	0.931108	0.911761	0.881582	0.859098	0.847857		0.413	0.260555	0.185968	0.132626	0.219141	0.215822	0.202479	0.33129	0.473658	0.425783	0.484043	0.606446	0.59241
0.414	0.360528	0.395729	0.526481	0.497514	0.641734	0.669975	0.760595	0.927602	0.912367	0.879028	0.858288	0.848089		0.414	0.26134	0.183992	0.130432	0.216532	0.213484	0.199135	0.327344	0.467566	0.419453	0.479441	0.606053	0.586456
0.415	0.360825	0.390897	0.519487	0.489773	0.632785	0.660542	0.754607	0.923497	0.912474	0.87622	0.857228	0.848165		0.415	0.261564	0.181854	0.128356	0.213974	0.210835	0.195898	0.323507	0.461523	0.41356	0.474615	0.604758	0.580483
0.416	0.361034	0.386187	0.512653	0.482578	0.623243	0.65153	0.748308	0.91881	0.912292	0.873532	0.85624	0.84791		0.416	0.260822	0.179615	0.126377	0.211314	0.207746	0.192856	0.319745	0.455746	0.407991	0.469659	0.602982	0.574721
0.417	0.360487	0.381469	0.505895	0.475919	0.61324	0.642925	0.741688	0.9136	0.911818	0.871259	0.855304	0.847136		0.417	0.259043	0.177326	0.12448	0.208625	0.204126	0.190049	0.315957	0.450166	0.402687	0.464708	0.600918	0.568836
0.418	0.358783	0.376716	0.498866	0.469586	0.602979	0.634701	0.734997	0.908076	0.911134	0.869564	0.854021	0.845753		0.418	0.25659	0.175091	0.122708	0.20608	0.200085	0.18743	0.312255	0.444435	0.39758	0.459802	0.598424	0.562216
0.419	0.355979	0.371888	0.491539	0.463439	0.592657	0.626946	0.728579	0.902385	0.910503	0.868418	0.852363	0.843838		0.419	0.253366	0.172984	0.12107	0.203743	0.195937	0.184885	0.308742	0.438185	0.392593	0.45502	0.595456	0.554473
0.42	0.352436	0.366934	0.484196	0.457404	0.582448	0.619633	0.722579	0.896582	0.910165	0.867626	0.850813	0.841418		0.42	0.249627	0.171007	0.119545	0.201569	0.19193	0.182388	0.305306	0.431175	0.387655	0.450576	0.592137	0.545991
0.421	0.34852	0.361911	0.47695	0.451438	0.572607	0.612622	0.716887	0.890541	0.910367	0.8667	0.849594	0.838408		0.421	0.24647	0.169177	0.118116	0.199392	0.188112	0.179962	0.301777	0.423665	0.382829	0.446455	0.588689	0.537725
0.422	0.344933	0.35693	0.469796	0.44527	0.563263	0.60564	0.711459	0.883966	0.91106	0.864916	0.848504	0.834741		0.422	0.244343	0.167478	0.116726	0.196938	0.184464	0.177628	0.298529	0.416172	0.378205	0.442474	0.585313	0.530073
0.423	0.342015	0.352135	0.462787	0.438572	0.554253	0.598629	0.706331	0.876966	0.912062	0.861814	0.847282	0.830571		0.423	0.242662	0.165911	0.115246	0.194132	0.180941	0.175346	0.295425	0.409018	0.373761	0.438406	0.582003	0.522758
0.424	0.339663	0.347588	0.456005	0.431311	0.545388	0.591761	0.701292	0.870078	0.913097	0.857484	0.845827	0.826001		0.424	0.240725	0.164481	0.113637	0.191128	0.177573	0.173101	0.292235	0.40238	0.369451	0.434088	0.578613	0.515537
0.425	0.337681	0.34322	0.449464	0.423746	0.53674	0.584989	0.695878	0.86308	0.913903	0.852253	0.844194	0.821049		0.425	0.237906	0.163124	0.111981	0.188064	0.17452	0.170913	0.288934	0.395679	0.365196	0.429579	0.574876	0.508273
0.426	0.335738	0.338909	0.443105	0.416231	0.528396	0.578016	0.689937	0.855747	0.914367	0.84658	0.842392	0.815936		0.426	0.234568	0.161721	0.110334	0.185135	0.171862	0.168764	0.285593	0.388578	0.360857	0.425036	0.570688	0.50068
0.427	0.333473	0.334598	0.436896	0.409071	0.520255	0.570683	0.683447	0.847922	0.91465	0.840746	0.840346	0.810758		0.427	0.231669	0.160213	0.108729	0.182614	0.169395	0.166636	0.282312	0.381103	0.356381	0.420432	0.566154	0.492517
0.428	0.3309	0.330285	0.430836	0.402405	0.512098	0.562962	0.676347	0.839378	0.914629	0.834885	0.838046	0.805441		0.428	0.229879	0.158606	0.10715	0.180552	0.166829	0.164524	0.279153	0.373655	0.351774	0.415608	0.56136	0.483839
0.429	0.328398	0.326003	0.424899	0.396237	0.503939	0.555005	0.668635	0.830073	0.914259	0.829155	0.835494	0.800031		0.429	0.229281	0.156887	0.105537	0.178749	0.164086	0.162468	0.27604	0.366583	0.34712	0.410386	0.556298	0.474985
0.43	0.326077	0.321684	0.419008	0.390472	0.495942	0.546965	0.660602	0.820388	0.913315	0.823687	0.832732	0.794683		0.43	0.229749	0.15502	0.103864	0.17698	0.161199	0.160483	0.272776	0.359858	0.342556	0.404761	0.550938	0.466368
0.431	0.32376	0.317265	0.413211	0.384926	0.488047	0.538837	0.652622	0.810742	0.911528	0.818444	0.829954	0.789464		0.431	0.231191	0.152954	0.102118	0.174998	0.158236	0.158588	0.269154	0.353495	0.338113	0.398972	0.545288	0.458347
0.432	0.321267	0.312923	0.407666	0.379536	0.480153	0.530655	0.644965	0.801437	0.909081	0.813386	0.827476	0.784204		0.432	0.233141	0.150771	0.100302	0.172734	0.155223	0.156803	0.265182	0.347622	0.333725	0.393219	0.53937	0.451355
0.433	0.318493	0.30883	0.402257	0.374319	0.472261	0.522441	0.637642	0.792822	0.906555	0.808543	0.825496	0.778645		0.433	0.235211	0.148685	0.0985101	0.170316	0.152162	0.155081	0.261045	0.342201	0.329297	0.38742	0.533283	0.445529
0.434	0.315305	0.305004	0.396808	0.3692	0.464273	0.514187	0.630564	0.784901	0.904156	0.803896	0.823822	0.772735		0.434	0.237254	0.146781	0.0968679	0.167848	0.149247	0.153389	0.256892	0.336813	0.32479	0.38155	0.527059	0.440345
0.435	0.311505	0.30135	0.391409	0.364069	0.456048	0.505941	0.623634	0.777312	0.901795	0.799191	0.822072	0.766525		0.435	0.239158	0.145008	0.0954272	0.165151	0.146677	0.151776	0.252759	0.331012	0.32023	0.375796	0.520757	0.435148
0.436	0.306866	0.297783	0.386101	0.358833	0.447619	0.497869	0.616577	0.769615	0.899238	0.794016	0.819814	0.760233		0.436	0.24041	0.143371	0.0941907	0.161985	0.144442	0.150302	0.248621	0.324872	0.315694	0.370373	0.514385	0.429385
0.437	0.301751	0.294234	0.380887	0.353386	0.439175	0.49019	0.609221	0.761387	0.89603	0.787909	0.816691	0.753956		0.437	0.240552	0.141898	0.0930786	0.158465	0.142482	0.148953	0.244472	0.318748	0.311339	0.365414	0.508097	0.42328
0.438	0.297067	0.290594	0.375689	0.347752	0.43088	0.483011	0.601594	0.752419	0.891961	0.780889	0.812406	0.747464		0.438	0.23982	0.140573	0.0919342	0.154951	0.140666	0.14759	0.240392	0.312883	0.307195	0.360869	0.502027	0.417547
0.439	0.293204	0.286711	0.370475	0.341949	0.422849	0.476251	0.593881	0.7428	0.88724	0.773653	0.806957	0.740537		0.439	0.23871	0.139306	0.0906997	0.151617	0.138852	0.146124	0.236577	0.30734	0.303163	0.35648	0.495932	0.412278
0.44	0.290053	0.282552	0.365539	0.335942	0.415157	0.469735	0.586346	0.732829	0.882268	0.766622	0.800693	0.733383		0.44	0.237459	0.138016	0.0894037	0.14834	0.136963	0.144586	0.233173	0.302251	0.299245	0.351814	0.489453	0.407136
0.441	0.287346	0.278211	0.360916	0.329859	0.407794	0.46331	0.578994	0.722715	0.877394	0.759765	0.793964	0.726362		0.441	0.236133	0.13672	0.0881136	0.145085	0.13505	0.143012	0.230031	0.29756	0.295483	0.346729	0.482428	0.401869
0.442	0.284729	0.273898	0.35634	0.323906	0.400649	0.456809	0.571667	0.712536	0.872788	0.752901	0.787063	0.719655		0.442	0.234551	0.135382	0.0868813	0.142152	0.13312	0.141399	0.226846	0.293111	0.291799	0.341321	0.474757	0.396329
0.443	0.281869	0.269806	0.351654	0.318204	0.393498	0.450182	0.564214	0.702354	0.868606	0.745908	0.780194	0.713088		0.443	0.232466	0.13396	0.0857163	0.139794	0.131027	0.139734	0.223547	0.288874	0.288103	0.335619	0.46642	0.390492
0.444	0.278692	0.265937	0.346896	0.312759	0.386237	0.443478	0.556569	0.692302	0.864287	0.738812	0.773318	0.706335		0.444	0.229701	0.132579	0.0845745	0.138004	0.128785	0.138029	0.220241	0.28494	0.284351	0.329638	0.45788	0.38452
0.445	0.275297	0.262203	0.342214	0.307434	0.378841	0.436762	0.548688	0.68252	0.859013	0.731431	0.766196	0.699242		0.445	0.226391	0.131366	0.0833989	0.136642	0.126607	0.13634	0.217025	0.281369	0.280552	0.323476	0.449983	0.378523
0.446	0.271742	0.258509	0.337533	0.30204	0.37126	0.430053	0.540589	0.673161	0.852498	0.723419	0.758566	0.69183		0.446	0.223327	0.130299	0.082221	0.13555	0.124599	0.1347	0.213968	0.277931	0.276714	0.31741	0.442908	0.372304
0.447	0.268042	0.254892	0.332631	0.296686	0.363515	0.423314	0.532377	0.664084	0.844684	0.714649	0.750265	0.684307		0.447	0.22101	0.129344	0.0811194	0.134609	0.122769	0.133113	0.211101	0.274592	0.272916	0.31183	0.436196	0.365561
0.448	0.264331	0.251397	0.327526	0.291493	0.355842	0.416604	0.524162	0.654941	0.835863	0.705074	0.741675	0.676948		0.448	0.219487	0.128504	0.0800771	0.133567	0.121224	0.131614	0.208335	0.27161	0.269276	0.306904	0.429691	0.358642
0.449	0.260925	0.247973	0.322441	0.286374	0.348478	0.409928	0.515878	0.645566	0.826592	0.694911	0.733648	0.669962		0.449	0.218343	0.127711	0.0790272	0.132187	0.120002	0.130224	0.205552	0.269028	0.265882	0.302598	0.423559	0.352441
0.45	0.257844	0.244548	0.31749	0.281206	0.34149	0.403159	0.507441	0.635998	0.817412	0.684533	0.726349	0.663264		0.45	0.217154	0.126788	0.0779603	0.130372	0.118946	0.128944	0.202575	0.266605	0.262808	0.298682	0.417781	0.347262
0.451	0.254812	0.24111	0.312663	0.275976	0.33474	0.396254	0.498873	0.626268	0.80855	0.67424	0.718999	0.656786		0.451	0.215484	0.125638	0.0768887	0.128174	0.117846	0.12774	0.199438	0.26424	0.260116	0.294768	0.412128	0.342864
0.452	0.251704	0.237646	0.307987	0.27081	0.328108	0.389186	0.490336	0.616502	0.800149	0.664347	0.711118	0.650404		0.452	0.212852	0.124351	0.075814	0.125799	0.116695	0.12655	0.196498	0.262012	0.257603	0.290678	0.406511	0.338811
0.453	0.24836	0.234122	0.303547	0.265917	0.321658	0.381914	0.481993	0.60695	0.792027	0.655235	0.702713	0.643845		0.453	0.20955	0.123083	0.0747658	0.123576	0.1156	0.125339	0.193514	0.259834	0.254784	0.286344	0.400948	0.334651
0.454	0.244706	0.230527	0.299418	0.261409	0.315492	0.374337	0.473894	0.597753	0.78405	0.646944	0.693877	0.636783		0.454	0.206394	0.121901	0.0737769	0.121645	0.114595	0.124139	0.190414	0.257493	0.251486	0.281803	0.395428	0.330292
0.455	0.240858	0.226956	0.295499	0.257244	0.309446	0.366436	0.466016	0.588712	0.776319	0.639129	0.684719	0.629209		0.455	0.204011	0.120776	0.0728103	0.119952	0.113649	0.122961	0.18726	0.254661	0.247872	0.277124	0.389911	0.325777
0.456	0.237042	0.223442	0.291625	0.253292	0.303134	0.358376	0.458258	0.579613	0.768788	0.631572	0.675216	0.621393		0.456	0.20291	0.119595	0.0718384	0.118329	0.112635	0.121733	0.184178	0.251025	0.24413	0.272266	0.384496	0.321194
0.457	0.233398	0.219967	0.287642	0.249447	0.29643	0.350431	0.450418	0.570556	0.760853	0.624032	0.665389	0.613431		0.457	0.20287	0.118333	0.0708731	0.116562	0.111462	0.120381	0.181327	0.246988	0.240405	0.26724	0.379252	0.316871
0.458	0.230154	0.216606	0.283523	0.245691	0.289479	0.342787	0.44248	0.561545	0.751296	0.61627	0.655359	0.605508		0.458	0.203095	0.117063	0.069909	0.114702	0.110146	0.118892	0.178694	0.242817	0.23663	0.262204	0.374177	0.313041
0.459	0.22718	0.213434	0.279338	0.242002	0.282476	0.335506	0.434544	0.552595	0.739797	0.60817	0.645217	0.597677		0.459	0.202879	0.115914	0.0689633	0.112954	0.108684	0.117306	0.176157	0.238471	0.23264	0.257327	0.369239	0.309515
0.46	0.224136	0.210409	0.275154	0.238344	0.275519	0.328533	0.426709	0.543707	0.727152	0.599632	0.635047	0.589636		0.46	0.202297	0.114903	0.0681081	0.111343	0.107135	0.115677	0.173774	0.233982	0.228401	0.252815	0.36434	0.306094
0.461	0.220984	0.207465	0.271017	0.234691	0.268672	0.321681	0.418964	0.534722	0.714379	0.590653	0.624971	0.581193		0.461	0.202087	0.113961	0.067367	0.109744	0.105596	0.114075	0.171802	0.229519	0.224022	0.248749	0.359489	0.302796
0.462	0.217518	0.204475	0.266973	0.231085	0.26208	0.314803	0.411257	0.525532	0.70233	0.58136	0.615016	0.572499		0.462	0.202128	0.113093	0.0667457	0.10819	0.104044	0.112549	0.170247	0.225105	0.219664	0.244995	0.354774	0.299513
0.463	0.213655	0.201295	0.263133	0.22751	0.255872	0.307899	0.403523	0.516141	0.691314	0.571745	0.604902	0.563879		0.463	0.201614	0.112285	0.0662369	0.10677	0.102582	0.111095	0.168778	0.220689	0.21547	0.241439	0.350146	0.296089
0.464	0.209585	0.19786	0.25964	0.223865	0.250128	0.301017	0.395741	0.506634	0.681094	0.561755	0.594305	0.555434		0.464	0.200374	0.111461	0.0657795	0.105409	0.10134	0.109714	0.167249	0.216476	0.211628	0.2381	0.345496	0.292561
0.465	0.205468	0.194152	0.256423	0.220143	0.244729	0.294147	0.387967	0.497083	0.671303	0.551523	0.583177	0.546944		0.465	0.198745	0.11062	0.0652986	0.104076	0.10018	0.108423	0.16579	0.212707	0.208253	0.235013	0.340821	0.289199
0.466	0.201725	0.190256	0.25322	0.216433	0.239374	0.287376	0.380288	0.487565	0.661571	0.54118	0.571546	0.538286		0.466	0.19713	0.109832	0.064757	0.102882	0.0989794	0.107198	0.164436	0.209308	0.205335	0.232118	0.336221	0.286186
0.467	0.198933	0.186313	0.249984	0.212868	0.233996	0.280822	0.372934	0.478083	0.651508	0.530693	0.559584	0.529411		0.467	0.195955	0.109112	0.0641523	0.101853	0.0977456	0.106006	0.163122	0.206017	0.202798	0.229262	0.331852	0.283453
0.468	0.197019	0.182467	0.246896	0.209581	0.228647	0.274456	0.366078	0.468676	0.640996	0.51999	0.547699	0.520328		0.468	0.195336	0.108463	0.0635212	0.100997	0.0965089	0.104807	0.161811	0.202628	0.20049	0.226286	0.327776	0.280605
0.469	0.195367	0.178839	0.244082	0.206598	0.223395	0.268163	0.359674	0.459402	0.630044	0.50916	0.536352	0.511264		0.469	0.195381	0.107873	0.0629289	0.100324	0.0953221	0.103604	0.16032	0.199102	0.198265	0.223182	0.323955	0.277462
0.47	0.193513	0.17554	0.241304	0.203826	0.218292	0.261844	0.353556	0.450256	0.618555	0.49841	0.525743	0.502528		0.47	0.196229	0.107256	0.0623702	0.0997232	0.0942726	0.102435	0.158482	0.195694	0.19602	0.220013	0.32029	0.274469
0.471	0.191273	0.17257	0.237924	0.201112	0.213311	0.255589	0.347565	0.44129	0.606299	0.487943	0.515799	0.494094		0.471	0.197508	0.106556	0.0617516	0.0991079	0.0934239	0.101264	0.15638	0.192736	0.193648	0.216887	0.316568	0.271936
0.472	0.188851	0.169807	0.233851	0.198282	0.208454	0.249609	0.34167	0.432438	0.593277	0.477804	0.506342	0.48571		0.472	0.198678	0.105764	0.0610403	0.0984823	0.0925635	0.100027	0.154124	0.190388	0.191114	0.213768	0.312605	0.269598
0.473	0.186376	0.167167	0.229578	0.195241	0.20371	0.244066	0.335937	0.423524	0.57978	0.468065	0.497126	0.477144		0.473	0.199644	0.104897	0.0602951	0.0977832	0.0915354	0.0987369	0.151876	0.188455	0.188554	0.210564	0.308389	0.267174
0.474	0.183908	0.16463	0.225655	0.191977	0.199008	0.238941	0.330421	0.414584	0.566277	0.458757	0.487876	0.468398		0.474	0.200615	0.104021	0.059598	0.0968682	0.0904069	0.0974756	0.149955	0.186545	0.18606	0.207372	0.304085	0.264418
0.475	0.18135	0.162218	0.222192	0.188529	0.194322	0.234099	0.325153	0.405715	0.553406	0.449761	0.478403	0.459725		0.475	0.201753	0.103193	0.0589722	0.095662	0.089161	0.0962976	0.148386	0.184312	0.183644	0.20436	0.299797	0.261291
0.476	0.178455	0.159916	0.218973	0.18502	0.189684	0.229407	0.320213	0.396934	0.541654	0.440896	0.468777	0.4514		0.476	0.20317	0.102519	0.0583953	0.0942523	0.0878133	0.0952172	0.146994	0.181665	0.181223	0.201645	0.29558	0.258002
0.477	0.175059	0.15771	0.215965	0.181672	0.185192	0.224808	0.315587	0.388117	0.531008	0.432003	0.459269	0.443462		0.477	0.204421	0.102046	0.0578537	0.092771	0.086563	0.0942138	0.145575	0.178853	0.17875	0.199212	0.291583	0.254887
0.478	0.171391	0.155562	0.213186	0.178565	0.180958	0.220353	0.311112	0.379244	0.521326	0.423013	0.450067	0.435808		0.478	0.205186	0.101677	0.0573489	0.0913031	0.0855379	0.0932496	0.14403	0.175955	0.176253	0.196913	0.287914	0.252454
0.479	0.167728	0.153374	0.21056	0.17563	0.177035	0.215996	0.306669	0.370469	0.51243	0.41402	0.440999	0.428241		0.479	0.205634	0.101302	0.0569145	0.0899581	0.0846635	0.0922563	0.142378	0.172866	0.173667	0.194627	0.284489	0.250782
0.48	0.164132	0.151081	0.208019	0.172858	0.173452	0.211655	0.302236	0.361965	0.503692	0.405095	0.431611	0.420574		0.48	0.205829	0.100926	0.0565565	0.0888422	0.0838308	0.0912102	0.140524	0.169838	0.170883	0.192293	0.281158	0.249336
0.481	0.16068	0.148784	0.205576	0.170319	0.170209	0.207291	0.29773	0.353888	0.494323	0.396198	0.421829	0.41275		0.481	0.205947	0.100623	0.0562565	0.0880437	0.0830361	0.0901412	0.138577	0.167398	0.167883	0.189829	0.277925	0.247751
0.482	0.157374	0.146563	0.203192	0.168019	0.167275	0.202874	0.29312	0.346288	0.484074	0.387346	0.411989	0.404724		0.482	0.206118	0.100368	0.0559819	0.0875595	0.0823142	0.0890642	0.136899	0.165483	0.164736	0.187177	0.27482	0.245919
0.483	0.154138	0.144463	0.200752	0.165837	0.164512	0.198458	0.288381	0.339068	0.473147	0.378665	0.402389	0.396582		0.483	0.206582	0.10005	0.0557175	0.0872329	0.0816211	0.0880088	0.135583	0.163532	0.161659	0.184298	0.271797	0.243792
0.484	0.151039	0.14248	0.198106	0.163642	0.161659	0.194176	0.283469	0.332117	0.461954	0.370262	0.393262	0.388567		0.484	0.206865	0.0996262	0.0554657	0.0868537	0.0809095	0.0870197	0.134451	0.161272	0.159003	0.181215	0.268791	0.241582
0.485	0.148294	0.140546	0.195197	0.16136	0.158526	0.190166	0.278427	0.325309	0.450633	0.362219	0.384709	0.380964		0.485	0.206631	0.0991417	0.0551657	0.0862895	0.0802065	0.0861112	0.133437	0.158788	0.156809	0.178018	0.26573	0.23951
0.486	0.145994	0.138589	0.192126	0.15903	0.155237	0.186434	0.273363	0.318584	0.439111	0.354457	0.376689	0.373772		0.486	0.206484	0.0986936	0.054802	0.0855015	0.079419	0.085209	0.132582	0.156379	0.154863	0.174793	0.262596	0.237531
0.487	0.143933	0.136548	0.189081	0.156707	0.152071	0.182913	0.268456	0.311985	0.427637	0.346663	0.369016	0.366781		0.487	0.206632	0.0983437	0.0544265	0.0846022	0.0785167	0.0842395	0.131785	0.154398	0.153091	0.171628	0.259328	0.235439
0.488	0.141846	0.134438	0.186341	0.154337	0.149091	0.179544	0.263767	0.305403	0.416676	0.338631	0.361356	0.35988		0.488	0.206674	0.0980524	0.0540345	0.0837448	0.0776355	0.0832394	0.130755	0.152552	0.151484	0.16868	0.255826	0.233094
0.489	0.139722	0.132335	0.183987	0.151824	0.146213	0.176261	0.259165	0.298926	0.40694	0.330378	0.353598	0.352957		0.489	0.206412	0.0977855	0.0536144	0.0828116	0.0768455	0.0822819	0.129338	0.150739	0.150063	0.166042	0.252154	0.230565
0.49	0.137814	0.130232	0.181891	0.149148	0.143403	0.173036	0.254562	0.292723	0.398478	0.321977	0.34584	0.346133		0.49	0.206073	0.0974758	0.0532096	0.0816235	0.0761567	0.081403	0.127671	0.14906	0.148803	0.163725	0.248534	0.228048
0.491	0.136074	0.128094	0.179835	0.146375	0.140636	0.169824	0.249933	0.286846	0.390557	0.313607	0.338174	0.339616		0.491	0.205399	0.0971278	0.0528232	0.0803178	0.0755538	0.0805971	0.125853	0.147573	0.147558	0.161639	0.245049	0.22562
0.492	0.134178	0.125951	0.177654	0.143633	0.137932	0.166607	0.245324	0.281244	0.382507	0.305424	0.330488	0.333349		0.492	0.20365	0.0968401	0.0524189	0.0791431	0.0750493	0.0798217	0.123849	0.146226	0.146172	0.159683	0.241559	0.22322
0.493	0.131985	0.123909	0.175237	0.140997	0.135299	0.163316	0.240744	0.275889	0.373918	0.297525	0.322616	0.327139		0.493	0.201021	0.0966293	0.051966	0.0781423	0.0747245	0.079018	0.121756	0.145174	0.144649	0.157772	0.237921	0.220736
0.494	0.129581	0.122064	0.172571	0.138453	0.132672	0.159911	0.236147	0.270726	0.364746	0.29002	0.314729	0.320768		0.494	0.198518	0.0964601	0.0514678	0.0772325	0.0745392	0.0781791	0.119776	0.144347	0.143097	0.155791	0.234328	0.218073
0.495	0.127054	0.120494	0.16975	0.135986	0.129973	0.156472	0.231535	0.26558	0.355178	0.282901	0.307182	0.314197		0.495	0.196499	0.0963113	0.0509358	0.076391	0.0743813	0.0773331	0.117984	0.143369	0.141565	0.153605	0.231035	0.215264
0.496	0.124528	0.119255	0.166868	0.133583	0.12721	0.153136	0.226944	0.260314	0.345583	0.276057	0.300195	0.307577		0.496	0.194724	0.096136	0.0503697	0.075655	0.0741981	0.0764939	0.116333	0.142276	0.139967	0.151177	0.228053	0.212484
0.497	0.122099	0.118321	0.164005	0.131239	0.124512	0.149942	0.222403	0.254904	0.336286	0.269475	0.293893	0.30108		0.497	0.193005	0.095876	0.0497876	0.0750329	0.0739124	0.0756876	0.114801	0.141338	0.138241	0.148533	0.225148	0.209901
0.498	0.119913	0.117612	0.161177	0.128958	0.121906	0.146831	0.2179	0.249528	0.32756	0.263232	0.288306	0.294791		0.498	0.191272	0.0955189	0.0492257	0.0745298	0.073504	0.0749444	0.113383	0.140549	0.136353	0.145671	0.222053	0.207506
0.499	0.118156	0.117018	0.158366	0.126717	0.119356	0.143764	0.213417	0.244373	0.319425	0.257355	0.283211	0.288698		0.499	0.189569	0.0950527	0.0487108	0.0740917	0.0730226	0.074256	0.112006	0.139676	0.134345	0.1427	0.218749	0.20534
0.5	0.116938	0.116366	0.155504	0.124454	0.116865	0.140742	0.208947	0.239603	0.311697	0.251654	0.278238	0.28276		0.5	0.187705	0.0944828	0.0482042	0.0736605	0.072478	0.0735753	0.110628	0.138585	0.132317	0.139754	0.215329	0.203312
0.501	0.11623	0.115506	0.152663	0.122202	0.114486	0.137856	0.20449	0.235336	0.304287	0.245889	0.273029	0.276986		0.501	0.185393	0.0938938	0.0476517	0.0731897	0.0717645	0.0728648	0.109432	0.137147	0.130398	0.136899	0.211867	0.201034
0.502	0.11574	0.114517	0.150098	0.120084	0.112247	0.135129	0.200053	0.231458	0.297246	0.240032	0.267444	0.271368		0.502	0.182803	0.0933197	0.0471161	0.0726191	0.0708436	0.0721646	0.108448	0.135385	0.128693	0.134176	0.208418	0.198467
0.503	0.115031	0.113556	0.147836	0.118194	0.11013	0.132436	0.195658	0.227822	0.290595	0.234184	0.261664	0.265803		0.503	0.180308	0.0927306	0.046647	0.0720594	0.0699342	0.0715219	0.107682	0.133467	0.127246	0.131612	0.205082	0.195951
0.504	0.113931	0.112628	0.145708	0.116544	0.108039	0.129676	0.191332	0.224381	0.284342	0.22844	0.255934	0.260183		0.504	0.177942	0.0921392	0.0462002	0.0717026	0.0692251	0.0709114	0.107148	0.13132	0.125951	0.129135	0.201921	0.193583
0.505	0.112567	0.111634	0.143388	0.115051	0.105895	0.126859	0.187085	0.220966	0.278358	0.222838	0.250407	0.254538		0.505	0.175669	0.0916127	0.0457282	0.0715183	0.0687386	0.0702736	0.106632	0.128757	0.124669	0.126599	0.198792	0.191384
0.506	0.111121	0.110567	0.14082	0.113619	0.103696	0.124032	0.182831	0.217458	0.272345	0.217391	0.245205	0.248903		0.506	0.173595	0.0911399	0.0452606	0.071346	0.0684744	0.0695808	0.106078	0.125952	0.123368	0.123975	0.195624	0.189374
0.507	0.109771	0.109536	0.138188	0.112227	0.101533	0.121219	0.178435	0.213885	0.266059	0.212195	0.240293	0.243201		0.507	0.171919	0.0905767	0.0448301	0.0710844	0.0683411	0.0688367	0.105506	0.123278	0.122155	0.12129	0.192575	0.187432
0.508	0.108795	0.108621	0.135602	0.110847	0.0995448	0.118431	0.17392	0.210284	0.259621	0.207305	0.235458	0.23732		0.508	0.170935	0.0898537	0.0443921	0.0707084	0.068151	0.0680679	0.104855	0.121016	0.121085	0.118606	0.189691	0.18533
0.509	0.108303	0.107799	0.133107	0.109405	0.097696	0.115686	0.169455	0.206779	0.25339	0.202634	0.230555	0.231284		0.509	0.1704	0.0890417	0.0439025	0.0701756	0.0678602	0.0672761	0.104082	0.119377	0.120125	0.115967	0.186954	0.182988
0.51	0.108222	0.107016	0.130661	0.107873	0.0958523	0.113061	0.165171	0.203526	0.24753	0.198101	0.225629	0.225267		0.51	0.169677	0.0882108	0.0433465	0.0694863	0.0675243	0.0664803	0.103222	0.11836	0.119245	0.113406	0.184407	0.180466
0.511	0.108474	0.106292	0.128223	0.106268	0.0939757	0.110628	0.161155	0.200487	0.242109	0.193704	0.220947	0.219359		0.511	0.168325	0.0873798	0.0427544	0.0686833	0.0671496	0.0657236	0.102382	0.117596	0.118447	0.110942	0.181993	0.177855
0.512	0.108807	0.10565	0.125819	0.10463	0.0921324	0.108376	0.157396	0.197492	0.23717	0.189454	0.216728	0.213571		0.512	0.166252	0.086602	0.0421715	0.0677778	0.0667093	0.0650127	0.101603	0.116534	0.117692	0.108588	0.179538	0.17528
0.513	0.108921	0.105094	0.123499	0.102982	0.0903936	0.106237	0.153781	0.194427	0.23254	0.185271	0.213009	0.207889		0.513	0.163863	0.0859575	0.0416032	0.0668328	0.0662617	0.0643289	0.100852	0.115025	0.116875	0.106318	0.177009	0.172856
0.514	0.108646	0.104565	0.121316	0.101382	0.0887626	0.104163	0.150275	0.191194	0.227857	0.181079	0.209654	0.202388		0.514	0.161663	0.0854154	0.0409684	0.0659617	0.0658901	0.0636309	0.100055	0.113267	0.11594	0.104077	0.174476	0.170737
0.515	0.107852	0.104087	0.119232	0.0999698	0.0872613	0.102132	0.14693	0.187699	0.223108	0.176878	0.206413	0.197202		0.515	0.160251	0.0849012	0.0402196	0.0652157	0.0655362	0.0628823	0.0990847	0.111347	0.11493	0.101822	0.171918	0.168816
0.516	0.106512	0.103751	0.117235	0.0987817	0.0859031	0.10018	0.143747	0.183969	0.218536	0.17265	0.203044	0.192309		0.516	0.159344	0.0843493	0.0394706	0.0645144	0.0651535	0.0620517	0.0978862	0.109575	0.113959	0.0995721	0.169332	0.166779
0.517	0.104705	0.10363	0.115356	0.0976878	0.0845692	0.0983189	0.140627	0.180151	0.214221	0.168482	0.199294	0.18769		0.517	0.157772	0.0837209	0.0388067	0.0637334	0.0648123	0.0611669	0.0965223	0.10862	0.113059	0.0973904	0.16676	0.164602
0.518	0.102887	0.103788	0.113568	0.0966155	0.0831501	0.0964827	0.137465	0.176455	0.21005	0.164539	0.195191	0.18328		0.518	0.155101	0.0831488	0.0381921	0.0628742	0.0645013	0.0603028	0.0951348	0.108033	0.11215	0.0952359	0.164285	0.162464
0.519	0.101685	0.104163	0.111776	0.0955888	0.0816552	0.0946344	0.13435	0.172998	0.205898	0.160865	0.191045	0.178959		0.519	0.151989	0.0827298	0.0375934	0.0620507	0.0641356	0.0594529	0.0939873	0.107435	0.1111	0.0930343	0.16204	0.160392
0.52	0.101269	0.104591	0.109982	0.0946274	0.0801245	0.0927794	0.131414	0.169744	0.201768	0.157369	0.187036	0.174707		0.52	0.149212	0.0824004	0.0370258	0.0613737	0.063734	0.0585824	0.0932461	0.10676	0.109883	0.090753	0.159995	0.158341
0.521	0.101302	0.104983	0.108199	0.0937531	0.0786045	0.0909421	0.128654	0.166672	0.197731	0.153955	0.183197	0.170566		0.521	0.147098	0.0820786	0.0364897	0.0608048	0.0633126	0.0577055	0.0927976	0.106094	0.108572	0.0884283	0.157978	0.156278
0.522	0.101422	0.105336	0.106454	0.0929521	0.0771221	0.0891723	0.126055	0.163768	0.193791	0.150556	0.17948	0.166544		0.522	0.145745	0.0817186	0.0359855	0.0601343	0.06279	0.0568545	0.0924437	0.105621	0.107352	0.0861531	0.156002	0.154193
0.523	0.101474	0.105671	0.104778	0.0921489	0.0756834	0.0874938	0.123614	0.160924	0.189936	0.147136	0.175836	0.162547		0.523	0.144946	0.081286	0.0355133	0.0593108	0.0621053	0.0560803	0.092109	0.105318	0.106399	0.0839932	0.154144	0.152142
0.524	0.1015	0.106001	0.103228	0.0912435	0.0743161	0.0859366	0.121297	0.157986	0.186282	0.143704	0.172225	0.158583		0.524	0.144372	0.0807982	0.0350636	0.0584413	0.0612968	0.0553934	0.091793	0.104709	0.105648	0.081988	0.152373	0.15014
0.525	0.101679	0.106287	0.101835	0.0902314	0.0730468	0.0844542	0.119078	0.154883	0.182891	0.14028	0.168515	0.154814		0.525	0.1439	0.0802642	0.0346366	0.0575937	0.0604688	0.0547442	0.0914459	0.103629	0.104982	0.0801477	0.150514	0.147989
0.526	0.101933	0.106432	0.100495	0.0891858	0.0718984	0.0829823	0.116913	0.151601	0.179685	0.136935	0.164593	0.151328		0.526	0.143356	0.0796588	0.0342459	0.0568157	0.0596536	0.0540678	0.0909433	0.102326	0.104378	0.0784524	0.148406	0.145576
0.527	0.10192	0.106418	0.0990914	0.088206	0.0708743	0.0815015	0.114774	0.148228	0.176483	0.133778	0.160484	0.148127		0.527	0.142474	0.079028	0.0339123	0.056157	0.0588606	0.0533491	0.0902016	0.100712	0.103889	0.0768321	0.146082	0.142837
0.528	0.101488	0.106335	0.0975942	0.0873287	0.0699431	0.0800266	0.112692	0.144955	0.173107	0.130817	0.156311	0.145088		0.528	0.141107	0.078485	0.0336098	0.0556912	0.0580911	0.0525851	0.0892597	0.098537	0.10353	0.0752947	0.143748	0.139743
0.529	0.100692	0.106257	0.0960364	0.0864531	0.069064	0.0785902	0.110701	0.141861	0.169481	0.127975	0.152114	0.142056		0.529	0.139182	0.0780612	0.0332644	0.0554716	0.0573396	0.0517662	0.0881627	0.0959288	0.103357	0.0739128	0.141643	0.136514
0.53	0.0996473	0.106244	0.0944496	0.0855224	0.0681922	0.0772151	0.108806	0.138885	0.165641	0.125254	0.147921	0.138958		0.53	0.136865	0.0776973	0.0328226	0.0553492	0.0566091	0.0509189	0.0869816	0.0933226	0.103424	0.07263	0.13976	0.133397
0.531	0.0985498	0.106348	0.0928874	0.0846366	0.0672457	0.0759146	0.106972	0.135871	0.16164	0.122692	0.143934	0.135824		0.531	0.134662	0.0772862	0.0323127	0.0550699	0.0559343	0.0500755	0.0858406	0.0909764	0.103586	0.0713342	0.138015	0.130532
0.532	0.0975126	0.106586	0.0914257	0.0838243	0.0661629	0.0746354	0.105135	0.132611	0.157491	0.120204	0.140513	0.13271		0.532	0.132762	0.0768058	0.0318544	0.0546888	0.0553704	0.0492695	0.0846143	0.0890377	0.103496	0.070011	0.136418	0.127942
0.533	0.0965652	0.106909	0.0900732	0.0829738	0.0649602	0.0733282	0.103248	0.129091	0.153229	0.117677	0.137618	0.129634		0.533	0.13103	0.0762971	0.0315071	0.0544901	0.0548971	0.0485162	0.083243	0.0877115	0.103019	0.0686801	0.134934	0.125528
0.534	0.0957316	0.107298	0.0887948	0.0819746	0.0637116	0.0720276	0.101288	0.125486	0.148981	0.115053	0.134787	0.12672		0.534	0.129392	0.0757882	0.0312672	0.0544679	0.0544437	0.0477929	0.0817895	0.0872	0.102253	0.0673625	0.133484	0.123226
0.535	0.0949827	0.10778	0.0875976	0.0807545	0.0625393	0.0707489	0.0992794	0.121979	0.144834	0.112324	0.131836	0.124137		0.535	0.127709	0.0753249	0.0311001	0.0543331	0.0539241	0.0470508	0.0802861	0.0872774	0.101312	0.0661567	0.132026	0.121088
0.536	0.0942029	0.108308	0.0865177	0.0793308	0.0615579	0.0694502	0.0973232	0.118759	0.140938	0.109535	0.128901	0.121837		0.536	0.125614	0.0749096	0.0309275	0.0540059	0.053258	0.0463084	0.0787719	0.0874533	0.100302	0.065169	0.130642	0.119206
0.537	0.0933321	0.108778	0.085627	0.077786	0.0607904	0.0681021	0.0955245	0.115858	0.137533	0.106781	0.126065	0.119579		0.537	0.122988	0.0744936	0.0306929	0.0535977	0.0525079	0.0456436	0.0773309	0.0875961	0.09923	0.064377	0.129335	0.117714
0.538	0.0924135	0.109134	0.084916	0.0762312	0.0601813	0.0667204	0.0939332	0.113191	0.134573	0.104138	0.123371	0.117301		0.538	0.120088	0.0740149	0.0304147	0.0531656	0.0517941	0.0450714	0.076008	0.0878918	0.0980991	0.0637145	0.127953	0.116672
0.539	0.0914632	0.109388	0.0843475	0.0747842	0.0596287	0.0653343	0.0925384	0.110703	0.131672	0.101683	0.120986	0.115134		0.539	0.117217	0.0734575	0.0301264	0.0527041	0.0511662	0.0445462	0.0747927	0.0883087	0.0969376	0.0630932	0.126449	0.116063
0.54	0.0904243	0.109552	0.0839025	0.0734722	0.0590729	0.0639928	0.0913229	0.108291	0.128415	0.0994101	0.119032	0.113148		0.54	0.114631	0.0728787	0.0298252	0.0522732	0.0505325	0.0440353	0.0736812	0.0886088	0.0957065	0.0624456	0.124902	0.115757
0.541	0.0892257	0.109699	0.0835437	0.0722208	0.0584972	0.0627154	0.0902292	0.105861	0.124698	0.0972408	0.117454	0.111309		0.541	0.112395	0.0723399	0.0294956	0.0519047	0.0498169	0.0435239	0.0727001	0.0884766	0.0943721	0.0617247	0.123305	0.115467
0.542	0.0879128	0.109848	0.0831955	0.0709829	0.0578731	0.0614664	0.0891725	0.103423	0.12074	0.0950901	0.116042	0.109598		0.542	0.110566	0.071901	0.0291198	0.0516081	0.04905	0.0429761	0.0719048	0.0876408	0.0929394	0.0609263	0.121622	0.115
0.543	0.0867451	0.109959	0.0827378	0.0697399	0.0571414	0.0602195	0.0881583	0.101019	0.116811	0.0929404	0.114539	0.108016		0.543	0.109146	0.0715454	0.0286573	0.0514522	0.0482538	0.0423853	0.0712963	0.0862427	0.0914373	0.0600807	0.119944	0.114206
0.544	0.0859307	0.109993	0.0821783	0.0684835	0.0562611	0.0589831	0.087241	0.0986658	0.1132	0.090838	0.112751	0.106568		0.544	0.10798	0.0711793	0.0281303	0.0513772	0.0474334	0.0417897	0.0708145	0.0846735	0.0899286	0.0592075	0.118319	0.113151
0.545	0.0854469	0.109895	0.0815828	0.0672176	0.0552704	0.0577601	0.0864101	0.0964213	0.110154	0.088776	0.110567	0.105128		0.545	0.107117	0.0707524	0.0276486	0.0512716	0.0466118	0.0412149	0.070406	0.0833759	0.0884412	0.0583393	0.116729	0.111967
0.546	0.0852979	0.109604	0.0810879	0.0658638	0.0542338	0.056538	0.0856181	0.0943551	0.107581	0.0866873	0.108054	0.10353		0.546	0.106543	0.0702612	0.0272557	0.0511879	0.0458544	0.0406467	0.0700218	0.0827955	0.0869334	0.0575444	0.115113	0.110635
0.547	0.0854886	0.109073	0.0807127	0.064399	0.0532055	0.0552818	0.0848872	0.0924864	0.105092	0.0845735	0.105462	0.101784		0.547	0.106308	0.0697523	0.0269153	0.0512689	0.0451965	0.0400859	0.0696394	0.0827532	0.0853397	0.0568717	0.113421	0.109123
0.548	0.0859372	0.108263	0.0803431	0.0629349	0.0522475	0.0540149	0.0842805	0.090782	0.102453	0.0825022	0.103088	0.0999763		0.548	0.106558	0.0693182	0.0266066	0.0516521	0.0446509	0.039551	0.0692809	0.0823511	0.0837112	0.0562537	0.111747	0.107638
0.549	0.0863017	0.107194	0.0798076	0.0615359	0.0514002	0.0528172	0.0837887	0.0891756	0.0996436	0.0804926	0.101063	0.0981902		0.549	0.107245	0.0688922	0.0263173	0.0522982	0.0442438	0.0390635	0.0689544	0.0818236	0.0821285	0.0556449	0.110246	0.106561
0.55	0.0862182	0.105961	0.07905	0.0601908	0.0506828	0.0517125	0.0833421	0.0875989	0.096836	0.078487	0.0993869	0.0964248		0.55	0.107903	0.0683729	0.0260745	0.0530457	0.0439639	0.0386665	0.0686728	0.0814693	0.0806882	0.0550486	0.108984	0.105963
0.551	0.08556	0.104611	0.0781417	0.058903	0.0500887	0.0506688	0.0829287	0.085978	0.094129	0.0764714	0.0980363	0.0946598		0.551	0.107921	0.0678063	0.0259054	0.0537547	0.0437388	0.0383873	0.0683594	0.0813824	0.0794532	0.0545147	0.107905	0.105556
0.552	0.0845112	0.103163	0.0771907	0.0576544	0.0495851	0.0496296	0.0826028	0.0841981	0.0915818	0.0744953	0.0969544	0.0928917		0.552	0.10705	0.0672753	0.0257771	0.0543585	0.0435034	0.0381896	0.0678487	0.0815697	0.0784426	0.0540612	0.106848	0.105021
0.553	0.0833638	0.101626	0.0763408	0.0564317	0.0491583	0.0485634	0.0824086	0.0822285	0.0892408	0.0725989	0.0960286	0.0911412		0.553	0.105314	0.0667522	0.025635	0.0549186	0.0432397	0.038004	0.0672391	0.0815663	0.0776057	0.0536707	0.105694	0.104278
0.554	0.0823407	0.100018	0.0756382	0.0552774	0.0487822	0.0475101	0.0823607	0.0802115	0.0871251	0.0708221	0.095051	0.0894697		0.554	0.103076	0.0661468	0.0254444	0.0554066	0.0429983	0.0377512	0.0665984	0.0809	0.0768197	0.0532792	0.104445	0.103442
0.555	0.0815138	0.0983387	0.0750537	0.0542661	0.0483521	0.0465495	0.0824096	0.0783486	0.0851815	0.0692067	0.0939588	0.0878518		0.555	0.100701	0.0654769	0.0252159	0.0557819	0.042823	0.0374342	0.0660218	0.0798524	0.0760226	0.0528279	0.103188	0.102658
0.556	0.0807403	0.0965839	0.0744992	0.0533775	0.0478128	0.0457186	0.082474	0.0767322	0.0833205	0.0677606	0.0927992	0.086184		0.556	0.0983601	0.0648867	0.0249942	0.0561553	0.042673	0.0371235	0.0655996	0.0789505	0.0751598	0.0523126	0.102064	0.102161
0.557	0.080124	0.0947857	0.0739635	0.0525133	0.0472084	0.0449534	0.0825457	0.0753863	0.081497	0.0664439	0.0916037	0.0844529		0.557	0.0963759	0.0644412	0.0247842	0.056575	0.0425076	0.0368671	0.0652846	0.0782897	0.0741549	0.0517502	0.101202	0.102016
0.558	0.0799872	0.0929407	0.0734774	0.0515432	0.046614	0.0442014	0.0826204	0.0742453	0.0797012	0.065175	0.0904028	0.0826804		0.558	0.0952271	0.0640408	0.0245554	0.0570186	0.0423102	0.0366641	0.0650172	0.0777999	0.0730014	0.0511553	0.10065	0.102091
0.559	0.0803855	0.0910067	0.0730255	0.0503942	0.0460793	0.0434672	0.082689	0.0732236	0.0779746	0.0638839	0.0891562	0.08091		0.559	0.0950364	0.0635192	0.024316	0.0574982	0.0421	0.0364856	0.0647607	0.0776591	0.0717674	0.0504897	0.1004	0.102247
0.56	0.081097	0.0890062	0.0725807	0.0491794	0.0456089	0.0427542	0.0827429	0.0722953	0.0763113	0.0625335	0.087885	0.0791931		0.56	0.0956686	0.0628262	0.0241142	0.0579719	0.0419466	0.0362881	0.0644983	0.0781492	0.0704477	0.0497662	0.100322	0.10241
0.561	0.0819027	0.0870146	0.0721616	0.0480857	0.0451852	0.0420586	0.0827726	0.0714806	0.0746455	0.0610847	0.0866718	0.0775916		0.561	0.0967536	0.0620431	0.0239962	0.0585226	0.0418768	0.0360466	0.0642262	0.0790638	0.069001	0.049105	0.100281	0.102487
0.562	0.082534	0.085064	0.0717777	0.047131	0.0448044	0.0413907	0.0827572	0.070849	0.0729419	0.0595439	0.0854496	0.0761618		0.562	0.097584	0.0613601	0.0240125	0.0597767	0.0419613	0.0357842	0.0639541	0.0798563	0.0675542	0.0485639	0.100207	0.102511
0.563	0.0828385	0.0830769	0.0714176	0.0462678	0.0444787	0.0407959	0.0826725	0.0704791	0.071212	0.0579599	0.0840023	0.074885		0.563	0.0976305	0.0609323	0.024116	0.0512722	0.0421773	0.0355121	0.0637225	0.0803661	0.0663807	0.0480928	0.0999485	0.102686
0.564	0.0828929	0.0809515	0.0711109	0.0454932	0.0442264	0.0402834	0.0824838	0.070376	0.0694626	0.0564019	0.0823127	0.0737177		0.564	0.0967868	0.0608504	0.0242036	0.0509365	0.0423744	0.0352199	0.0635448	0.0805866	0.0655465	0.0476304	0.0994895	0.102955
0.565	0.0828259	0.0787134	0.0709272	0.0447849	0.044021	0.0398147	0.0822128	0.0703234	0.0677327	0.054943	0.0805918	0.072574		0.565	0.0952346	0.0611534	0.0242176	0.050577	0.0424308	0.0349301	0.0633987	0.0802915	0.0648397	0.0471454	0.0989845	0.103122
0.566	0.0828302	0.0764303	0.0708363	0.044175	0.0437931	0.039358	0.0819247	0.0699864	0.0660718	0.0535911	0.078949	0.0713811		0.566	0.0935206	0.0618244	0.0241778	0.0502035	0.0423127	0.034713	0.0633001	0.0798085	0.0640832	0.0465697	0.0985083	0.103156
0.567	0.0831317	0.0741927	0.0707354	0.0437064	0.0434704	0.0388904	0.0816269	0.069304	0.0644413	0.0523645	0.0773793	0.070184		0.567	0.0922831	0.0627048	0.0241498	0.0498185	0.0420964	0.0345805	0.0632321	0.0798544	0.0632657	0.0458547	0.0980129	0.103032
0.568	0.0838562	0.072094	0.0705099	0.0433741	0.043024	0.0384137	0.0812356	0.06845	0.0627392	0.0512777	0.0758776	0.0690675		0.568	0.0916418	0.0635186	0.0241566	0.049395	0.0418132	0.0344563	0.0630758	0.0804326	0.0624981	0.0450293	0.0974842	0.102529
0.569	0.0849362	0.0701168	0.0701364	0.0431407	0.0424903	0.0379505	0.0806901	0.0674915	0.0610034	0.0503005	0.0744269	0.067993		0.569	0.0912981	0.0641527	0.024116	0.0489642	0.0414209	0.0342981	0.0627055	0.0809611	0.0618256	0.0441577	0.0969179	0.101562
0.57	0.0861328	0.068198	0.0696085	0.042922	0.0419428	0.0375047	0.0800093	0.0664235	0.0594761	0.0493504	0.0729026	0.0669296		0.57	0.0910344	0.0646177	0.0242036	0.0486292	0.0409618	0.0341036	0.0621492	0.0811009	0.06121	0.0432276	0.0962644	0.100336
0.571	0.0872944	0.0663708	0.068936	0.0426834	0.0414294	0.0370546	0.0792057	0.0653372	0.0582418	0.0483501	0.0710819	0.065874		0.571	0.0907931	0.0649074	0.0242176	0.0484892	0.0405256	0.03389	0.061513	0.0807768	0.0606346	0.042216	0.0954496	0.0990246
0.572	0.0883516	0.0647	0.0681878	0.0424618	0.0409721	0.0365393	0.0783051	0.0643532	0.0571877	0.0473036	0.0689608	0.0648204		0.572	0.0906837	0.0649858	0.0241778	0.048504	0.0401358	0.0336587	0.0608832	0.0801843	0.0601257	0.0411546	0.0945269	0.0977653
0.573	0.0890707	0.0632408	0.0673678	0.0422746	0.0405797	0.0359114	0.0773295	0.0634513	0.0561525	0.0462542	0.0666947	0.0637873		0.573	0.0908294	0.0649379	0.0241498	0.0484892	0.0398234	0.0334241	0.0602971	0.0797148	0.0597352	0.0400691	0.0937011	0.0966725
0.574	0.0891262	0.0619553	0.0664848	0.0421272	0.0402399	0.0352001	0.076241	0.0625315	0.0550159	0.0452349	0.0643707	0.0627982		0.574	0.0911619	0.0648666	0.0241566	0.048504	0.039613	0.0332085	0.0597052	0.0794783	0.0594691	0.0389909	0.0930619	0.0958172
0.575	0.0884919	0.060731	0.0655693	0.0420232	0.0399579	0.0344634	0.0750263	0.061657	0.0537291	0.0442495	0.0620919	0.0618179		0.575	0.0915558	0.0647898	0.02784	0.0512722	0.0394243	0.0329678	0.0589543	0.0794074	0.0592951	0.038003	0.0925362	0.0950421
0.576	0.0874175	0.0595404	0.0646484	0.0419639	0.039754	0.0337821	0.0737368	0.0608942	0.0523632	0.0432597	0.0600083	0.0608652		0.576	0.0918763	0.0647657	0.0295039	0.0509365	0.0391826	0.0326488	0.058063	0.079314	0.0591992	0.0371787	0.0920357	0.0941718
0.577	0.086027	0.0584031	0.0637371	0.0419058	0.0396851	0.033266	0.072413	0.0602174	0.0510991	0.0422535	0.0582041	0.0599707		0.577	0.0920367	0.064823	0.0315836	0.050577	0.0388548	0.0322765	0.0572335	0.0788663	0.0591759	0.0365347	0.0915909	0.0933266
0.578	0.0844339	0.0573474	0.0628433	0.0417296	0.0397586	0.032946	0.07106	0.0595527	0.0500913	0.0412621	0.0566001	0.0591514		0.578	0.0920759	0.0649189	0.0342178	0.0502035	0.0384648	0.0319078	0.0564968	0.0779711	0.0591628	0.036018	0.091262	0.0927356
0.579	0.0828472	0.0563832	0.0620188	0.0414421	0.0398956	0.0327746	0.0697108	0.0588299	0.049377	0.0402801	0.055051	0.0584914		0.579	0.0921148	0.0649768	0.0512722	0.0498185	0.0381027	0.0316316	0.0557276	0.0768742	0.0590072	0.035615	0.0910119	0.0922767
0.58	0.0815148	0.0554486	0.0613661	0.0411628	0.0400074	0.0326544	0.0683082	0.0580497	0.048813	0.0393088	0.053442	0.0580362		0.58	0.0922024	0.0649769	0.0509365	0.049395	0.0377948	0.0314671	0.0550761	0.0757003	0.0586459	0.0353491	0.0907267	0.091638
0.581	0.0806921	0.0544693	0.0608643	0.0409481	0.0400421	0.0325274	0.0668227	0.0573138	0.0482391	0.0383976	0.0516845	0.0577755		0.581	0.0922713	0.0649499	0.050577	0.0489642	0.0375241	0.031353	0.0545061	0.0744495	0.058093	0.0351567	0.0903861	0.0909177
0.582	0.0803416	0.0534656	0.0603778	0.0408245	0.0399871	0.0323354	0.0652303	0.0566827	0.0475776	0.0376098	0.0497699	0.0575064		0.582	0.0923135	0.0648992	0.0502035	0.0486292	0.0373143	0.0312189	0.0540077	0.0731224	0.0573273	0.0349189	0.0901238	0.0904775
0.583	0.0802401	0.0525001	0.0598749	0.0407918	0.0398348	0.0320521	0.0635102	0.0561529	0.0467466	0.0369083	0.0477573	0.0570595		0.583	0.0924174	0.0648341	0.0498185	0.0484892	0.03718	0.0310338	0.0537879	0.0716853	0.0564219	0.0345893	0.0900348	0.0903837
0.584	0.0802884	0.0516396	0.0593698	0.0407978	0.0395642	0.0317016	0.0616688	0.0556388	0.0457026	0.0362123	0.0457608	0.0564182		0.584	0.0928295	0.0648251	0.049395	0.048504	0.0371201	0.0308171	0.0537652	0.0703623	0.0555395	0.0341738	0.0900723	0.0902963
0.585	0.0802967	0.0508563	0.0588864	0.0408022	0.0391935	0.0312903	0.0597346	0.0550655	0.0444585	0.0354637	0.043976	0.0556959		0.585	0.0938672	0.0649464	0.0489642	0.0512722	0.0371231	0.030615	0.0537638	0.0696062	0.0547848	0.0336915	0.0901872	0.0899712
0.586	0.0800576	0.0501218	0.0584371	0.0408009	0.0388094	0.0308067	0.0577731	0.054418	0.0430591	0.0346231	0.0424744	0.0550354		0.586	0.0954473	0.0651747	0.0486292	0.0509365	0.0371354	0.0304456	0.0536216	0.069409	0.0542105	0.0331234	0.0903495	0.0895101
0.587	0.0794682	0.0494745	0.0580567	0.040826	0.0384287	0.0302931	0.0558405	0.0537083	0.0416235	0.0337084	0.0411807	0.0544729		0.587	0.0972889	0.0654437	0.0484892	0.050577	0.0370552	0.0302574	0.0533026	0.0692815	0.0538257	0.0324784	0.0904954	0.0890292
0.588	0.0784659	0.0489315	0.0577335	0.0408703	0.0380118	0.0298101	0.0539257	0.05292	0.040359	0.0327716	0.0400558	0.0539763		0.588	0.0991535	0.0657645	0.048504	0.0502035	0.0368092	0.0299999	0.0529245	0.0692224	0.053595	0.0318308	0.0905472	0.0886033
0.589	0.0771377	0.0485251	0.0574287	0.0408942	0.0375759	0.0293273	0.0520071	0.0519937	0.0393155	0.0318433	0.0390847	0.053488		0.589	0.100794	0.0661504	0.0512722	0.0498185	0.0364658	0.0296804	0.0525911	0.0697953	0.0534492	0.0312014	0.0904869	0.0883313
0.59	0.0757568	0.0483222	0.0570776	0.0408911	0.0372061	0.0287771	0.0500522	0.0509372	0.038374	0.0309497	0.038239	0.0529894		0.59	0.102229	0.0665448	0.0509365	0.049395	0.036194	0.029344	0.0523622	0.0709287	0.0532909	0.0306061	0.0902471	0.0882267
0.591	0.0746725	0.0483146	0.0566992	0.0408407	0.0369371	0.0281427	0.0480722	0.0498674	0.0374995	0.0300986	0.0374379	0.0525448		0.591	0.10339	0.0669099	0.050577	0.0489642	0.0359724	0.0290412	0.0522553	0.0718801	0.0530776	0.0300319	0.0897787	0.0880888
0.592	0.0739489	0.0484321	0.0563796	0.0406506	0.0367603	0.0274573	0.0461353	0.048801	0.0367415	0.0293143	0.0366308	0.0521444		0.592	0.103859	0.0672809	0.0502035	0.0486292	0.035679	0.0287958	0.05219	0.0723959	0.0528045	0.0294203	0.0891169	0.0876393
0.593	0.073382	0.0486357	0.0561408	0.0402717	0.0366618	0.0267819	0.0443592	0.0476741	0.0362352	0.0286362	0.0358756	0.0516113		0.593	0.10374	0.0676873	0.0498185	0.0484892	0.0352167	0.0286051	0.0520942	0.0726833	0.0524897	0.0287618	0.0882878	0.0868538
0.594	0.0727491	0.0489604	0.0559459	0.0397599	0.0365863	0.0261406	0.0428452	0.0464542	0.035971	0.0280763	0.0352288	0.0508658		0.594	0.103778	0.0680533	0.049395	0.048504	0.0346733	0.0284697	0.0519724	0.0727259	0.0521661	0.0280614	0.0873638	0.0857821
0.595	0.071986	0.0493941	0.0557321	0.0392353	0.0364571	0.0255197	0.0416129	0.0450871	0.0357919	0.0275775	0.0346964	0.0500101		0.595	0.104434	0.0682011	0.0489642	0.0512722	0.0342233	0.0283856	0.0518199	0.0723492	0.0518789	0.0273246	0.0864082	0.0845343
0.596	0.0710637	0.0498231	0.0554422	0.038797	0.0362397	0.0248914	0.0405623	0.0436573	0.0355197	0.027084	0.0342529	0.0491444		0.596	0.105646	0.0679655	0.0486292	0.0509365	0.0339124	0.0283388	0.0515839	0.0714968	0.0516793	0.0265562	0.0853755	0.0833796
0.597	0.0698771	0.0501605	0.0550234	0.0384489	0.0359502	0.0242857	0.0394878	0.0424485	0.0350108	0.0265948	0.0337786	0.0482575		0.597	0.107001	0.0672941	0.0484892	0.050577	0.0337285	0.0282914	0.0512722	0.0701952	0.0515763	0.0258193	0.0843298	0.0825461
0.598	0.0683114	0.0503852	0.0544617	0.038142	0.0356419	0.0237501	0.0382796	0.041548	0.0342131	0.0260651	0.0330515	0.047294		0.598	0.108246	0.0663556	0.048504	0.0502035	0.0336641	0.0282166	0.0509365	0.0686304	0.0514577	0.0251799	0.0834279	0.081917
0.599	0.0663149	0.0504841	0.0537766	0.0378334	0.0353281	0.0232673	0.0370226	0.0408342	0.033174	0.0254595	0.0320265	0.0462961		0.599	0.109421	0.0654438	0.0512722	0.0498185	0.0336516	0.0281285	0.050577	0.0670319	0.0512526	0.0246642	0.0827045	0.0812957
0.6	0.0641131	0.0504622	0.0530052	0.0375044	0.0349735	0.0227939	0.0358139	0.0402901	0.0320077	0.0247925	0.0308571	0.0453617		0.6	0.110422	0.06468	0.0509365	0.049395	0.0336964	0.0280645	0.0502035	0.0654359	0.0509732	0.0242521	0.0820467	0.0807542
0.601	0.0622254	0.0503352	0.0522143	0.0371268	0.0345774	0.0223233	0.0346764	0.0399391	0.0307704	0.0240872	0.0297507	0.0444627		0.601	0.110959	0.0641538	0.050577	0.0489642	0.0338422	0.0280572	0.0498185	0.0638142	0.0506415	0.0239159	0.0814232	0.0803192
0.602	0.060843	0.0501069	0.0515121	0.0366631	0.0341874	0.0218856	0.0336395	0.0396553	0.0295118	0.0233738	0.0288876	0.0435059		0.602	0.11101	0.06397	0.0502035	0.0486292	0.0340754	0.0281203	0.049395	0.062268	0.0502759	0.0236226	0.0809088	0.0798892
0.603	0.059813	0.0497974	0.0509579	0.0361363	0.0338666	0.0215584	0.0326986	0.0392246	0.0282775	0.0226468	0.0281835	0.0424726		0.603	0.110711	0.0640934	0.0498185	0.0484892	0.0342978	0.0282641	0.0489642	0.0609442	0.0498221	0.0233113	0.0804638	0.0793774
0.604	0.0590829	0.0494503	0.0505654	0.0355904	0.033609	0.0213635	0.0318421	0.038615	0.0270786	0.0218766	0.0274066	0.0413736		0.604	0.110159	0.0642898	0.049395	0.048504	0.0344324	0.0284666	0.0486292	0.0598128	0.0492557	0.0229974	0.0799059	0.0786808
0.605	0.0586605	0.0490681	0.0502852	0.035002	0.0333563	0.0212114	0.0311061	0.0379511	0.025953	0.0210795	0.0265284	0.0402216		0.605	0.109396	0.0643972	0.0489642	0.0539404	0.0344928	0.0286813	0.0484892	0.0586799	0.0486072	0.0226797	0.0791892	0.0778214
0.606	0.058459	0.0486495	0.0499846	0.0343343	0.0330863	0.0210339	0.0304855	0.0372157	0.0249065	0.0203087	0.0256961	0.0390334		0.606	0.108371	0.0644318	0.0486292	0.0511988	0.0346006	0.0289115	0.048504	0.0574001	0.0479123	0.02231	0.0784116	0.0769714
0.607	0.0582616	0.0482357	0.049541	0.0335965	0.0328261	0.020775	0.0299473	0.0363442	0.0238775	0.0196106	0.0249792	0.0378804		0.607	0.106906	0.0644384	0.0484892	0.0482308	0.0348755	0.0292157	0.0486086	0.0560282	0.0472003	0.0218706	0.0776265	0.0761827
0.608	0.0578906	0.0478641	0.0489058	0.0328984	0.0325372	0.0203392	0.0294695	0.0353884	0.0227479	0.0189958	0.0243374	0.0368711		0.608	0.104957	0.0644055	0.048504	0.0449735	0.0353335	0.0296199	0.0487235	0.0546554	0.0464884	0.0214132	0.0768061	0.0754116
0.609	0.0572799	0.0475347	0.0481261	0.0323791	0.032184	0.0197065	0.0289928	0.034464	0.0214727	0.0184424	0.0237972	0.035994		0.609	0.1029	0.064309	0.0512722	0.0421707	0.0358702	0.0301178	0.048768	0.0532623	0.0458063	0.0210663	0.0759686	0.0746734
0.61	0.0565342	0.047287	0.0472581	0.0320066	0.0317906	0.018942	0.0284491	0.0336362	0.020069	0.0179585	0.0234973	0.0350715		0.61	0.101513	0.0641957	0.0509365	0.0403256	0.0362934	0.0306417	0.0488235	0.0517936	0.0451823	0.0208895	0.0751796	0.0738916
0.611	0.0557953	0.0471697	0.046358	0.0316589	0.0313876	0.0181684	0.0279048	0.0328142	0.0186885	0.0175487	0.0235345	0.0339779		0.611	0.101262	0.0640684	0.050577	0.0393413	0.0364636	0.0311703	0.0488377	0.0502498	0.0445884	0.0208213	0.074436	0.0729619
0.612	0.0549256	0.0471457	0.0454799	0.0312993	0.0309966	0.0174449	0.0273897	0.031886	0.0174422	0.0172116	0.0238263	0.0327635		0.612	0.102265	0.0639555	0.0502035	0.0390279	0.0364108	0.0317497	0.0488141	0.0488192	0.0440449	0.0207441	0.0736734	0.0718499
0.613	0.0539036	0.0471265	0.0447078	0.030944	0.0306281	0.0168379	0.0269461	0.0309445	0.0163856	0.0169074	0.0241523	0.0316003		0.613	0.104457	0.0639185	0.0498185	0.0392049	0.036251	0.0324211	0.0487807	0.0478255	0.0436777	0.0206379	0.0728499	0.0704587
0.614	0.0529709	0.0470594	0.0440826	0.0305927	0.0302587	0.0163867	0.0266247	0.0301168	0.0155426	0.0165971	0.0243459	0.0305364		0.614	0.107464	0.0639693	0.049395	0.0397423	0.0360824	0.0332632	0.0487172	0.0473641	0.0434519	0.0205035	0.0720086	0.0688632
0.615	0.0523073	0.0469472	0.0435442	0.0302363	0.0298825	0.0160352	0.0264495	0.0294284	0.0149051	0.0162843	0.0243666	0.0295857		0.615	0.110634	0.0640553	0.0489642	0.0405272	0.0359541	0.0343817	0.0485498	0.047405	0.0431716	0.0203733	0.0712578	0.0674712
0.616	0.0520867	0.0467945	0.0429925	0.029859	0.0294526	0.0157032	0.0264094	0.0287624	0.014467	0.0159843	0.0242077	0.0287479		0.616	0.112914	0.0641537	0.0486292	0.0414064	0.0357659	0.0359145	0.0483208	0.047788	0.0427198	0.0202199	0.0706216	0.0664735
0.617	0.0522917	0.0466125	0.0422838	0.0294381	0.0289839	0.0153437	0.0264714	0.0280055	0.0141913	0.0157007	0.0238443	0.0279515		0.617	0.113625	0.0642878	0.0484892	0.042186	0.0354702	0.037704	0.0481763	0.0481854	0.0420836	0.019975	0.0700592	0.0658329
0.618	0.0525803	0.0464295	0.0414369	0.0289892	0.0285841	0.0149548	0.0266108	0.0271645	0.013993	0.0154169	0.0233004	0.0271484		0.618	0.112959	0.0644922	0.048504	0.0427125	0.0351788	0.0393437	0.04815	0.0484331	0.0413429	0.0196182	0.0695298	0.065457
0.619	0.0525817	0.046253	0.0406477	0.0286237	0.0282783	0.0145817	0.0268071	0.0263542	0.013713	0.0150955	0.0226362	0.0263352		0.619	0.111717	0.0647586	0.0512722	0.0428889	0.0350013	0.0407429	0.0482115	0.0482873	0.0405853	0.0191741	0.0689965	0.0651951
0.62	0.0521264	0.0460443	0.0400362	0.0284305	0.0280267	0.0142906	0.0270343	0.0257111	0.0133366	0.0147091	0.021873	0.0255589		0.62	0.110629	0.0650008	0.0509365	0.042777	0.0349239	0.04207	0.0482885	0.0473485	0.0398169	0.0188194	0.0684216	0.0649737
0.621	0.0510953	0.0457422	0.0396568	0.0284011	0.0277576	0.0140916	0.0272751	0.0252215	0.0129498	0.0143045	0.0210485	0.0248667		0.621	0.11013	0.0652332	0.050577	0.0425784	0.0348545	0.0433891	0.0482343	0.0457681	0.0390119	0.0185932	0.0678851	0.0647985
0.622	0.0493684	0.0453261	0.0394613	0.0284856	0.0274216	0.0139432	0.0274939	0.0247189	0.0125614	0.0139841	0.0202548	0.0242366		0.622	0.110646	0.0655153	0.0502035	0.0424077	0.0347915	0.0446926	0.0480043	0.0439977	0.0382111	0.018394	0.0674811	0.0646948
0.623	0.0470747	0.0448262	0.0392899	0.0286514	0.027029	0.0137871	0.0276326	0.0240787	0.0121745	0.01378	0.0195594	0.0236804		0.623	0.112679	0.0657945	0.0498185	0.0422051	0.0348188	0.0459194	0.0477283	0.0423023	0.0374708	0.0182004	0.0672544	0.0646657
0.624	0.0445851	0.0442509	0.0390421	0.0288588	0.0266121	0.0135925	0.0276081	0.0233238	0.0116934	0.0136095	0.0189948	0.0232624		0.624	0.116132	0.0659697	0.049395	0.0419167	0.0349801	0.0470121	0.0474977	0.040959	0.0367714	0.0180249	0.0672757	0.0646272
0.625	0.0423392	0.043577	0.0387174	0.0289998	0.0262008	0.0134008	0.0273557	0.0225238	0.0111143	0.0134135	0.018557	0.0229869		0.625	0.119831	0.0660071	0.0489642	0.0415642	0.0352043	0.0479199	0.0473019	0.0401759	0.0360501	0.0178703	0.067614	0.0644766
0.626	0.0407041	0.0428377	0.0383784	0.0289578	0.0258016	0.0132421	0.0268885	0.0217395	0.0105224	0.0132035	0.0182406	0.0227907		0.626	0.122331	0.0660015	0.0486292	0.0410755	0.0354023	0.0486232	0.0471392	0.0398617	0.0352211	0.0177187	0.0681476	0.0641437
0.627	0.0397843	0.0420749	0.0380632	0.0287077	0.025418	0.0131233	0.0263306	0.0210373	0.00998825	0.0129899	0.0179888	0.0225841		0.627	0.123345	0.066089	0.0484892	0.0404104	0.0355515	0.0491389	0.0470977	0.0398158	0.0342671	0.0175364	0.06867	0.0635556
0.628	0.0393758	0.041291	0.0378004	0.028275	0.0250409	0.0130274	0.025873	0.0204832	0.00956253	0.0127808	0.0176133	0.02229		0.628	0.12344	0.0662783	0.048504	0.0397182	0.0356244	0.0494978	0.0471655	0.0400088	0.033267	0.0173508	0.0690395	0.0627281
0.629	0.0392491	0.0405043	0.0375682	0.0276947	0.024643	0.0129416	0.0256122	0.0200951	0.00927146	0.0125929	0.0171194	0.0219322		0.629	0.123022	0.0664786	0.0512722	0.0391205	0.0355765	0.0497092	0.0472107	0.0403537	0.0323612	0.0171989	0.06928	0.061859
0.63	0.0392792	0.0397215	0.037385	0.0270342	0.0242552	0.0128542	0.0255597	0.0198478	0.00909032	0.0124265	0.0166519	0.0215761		0.63	0.12232	0.0667052	0.0509365	0.0386248	0.0354353	0.0497747	0.0473303	0.0406208	0.0316154	0.017037	0.0694562	0.0611137
0.631	0.0392522	0.0389542	0.0373022	0.0263675	0.0239391	0.0127336	0.0257116	0.0196649	0.00893848	0.0122697	0.0162048	0.0212243		0.631	0.121792	0.0670483	0.050577	0.0381645	0.0351709	0.0497051	0.0477446	0.04077	0.0310378	0.0168317	0.069626	0.0605026
0.632	0.0388943	0.0382207	0.0373133	0.0258228	0.0236927	0.012523	0.025926	0.0193902	0.0088103	0.0121397	0.0157569	0.0208024		0.632	0.121993	0.0674015	0.0502035	0.0376549	0.0347306	0.0495345	0.0483254	0.0408602	0.0306018	0.0166111	0.0697958	0.0600572
0.633	0.0381802	0.0375298	0.0373606	0.0255197	0.0234916	0.0121836	0.0260947	0.0189142	0.00877115	0.0120689	0.0153404	0.0202891		0.633	0.12322	0.0676011	0.0498185	0.0370859	0.0342271	0.0493081	0.0490725	0.0408039	0.0302469	0.0164567	0.0699219	0.0598973
0.634	0.0373226	0.0368942	0.0373987	0.0254782	0.023283	0.0116974	0.0261888	0.0183239	0.00886654	0.0120663	0.0150964	0.0197453		0.634	0.125472	0.0677039	0.049395	0.0366029	0.0338136	0.0490677	0.0500108	0.040647	0.0299702	0.0164662	0.0700424	0.0600759
0.635	0.0365149	0.0363102	0.0373717	0.0256261	0.0230519	0.0111076	0.0262134	0.0177901	0.00906218	0.0121335	0.0151908	0.0191729		0.635	0.128561	0.0678377	0.0489642	0.0363559	0.0334859	0.0488298	0.0509053	0.0407175	0.0297146	0.0166537	0.0701978	0.0605653
0.636	0.0359194	0.0358289	0.0371204	0.0258885	0.0228457	0.0105539	0.026176	0.0173834	0.00919799	0.0122424	0.0156729	0.0185751		0.636	0.132086	0.0679871	0.0486292	0.036328	0.0332389	0.0485775	0.0514051	0.0412555	0.0293571	0.0170132	0.0703558	0.0612412
0.637	0.0356588	0.035517	0.036603	0.026214	0.0226556	0.0101625	0.0261017	0.0171225	0.00922273	0.0123805	0.0164595	0.0180615		0.637	0.135303	0.0680985	0.0484892	0.0364585	0.0331084	0.0482714	0.0515201	0.0421303	0.028867	0.0175443	0.0704286	0.0619001
0.638	0.0357493	0.0353588	0.0359375	0.0265153	0.022418	0.00995942	0.0259965	0.0169883	0.0092145	0.0125498	0.0173106	0.0177312		0.638	0.137905	0.0681498	0.048504	0.0368149	0.0329967	0.0478922	0.0514937	0.0431704	0.0283074	0.0181479	0.0704264	0.0625206
0.639	0.0361958	0.0352628	0.0352124	0.0266802	0.0221296	0.00991758	0.025935	0.0168916	0.00921814	0.0127205	0.0178727	0.0175909		0.639	0.140094	0.0681974	0.021035	0.0374685	0.0327735	0.0474311	0.0515723	0.0444007	0.0277158	0.0186351	0.0704604	0.0631452
0.64	0.0369139	0.0351426	0.0344705	0.0267213	0.021831	0.0099982	0.0260203	0.0167235	0.00925521	0.0128956	0.017966	0.0175909		0.64	0.141698	0.0683348	0.0209626	0.0381399	0.0324341	0.0468529	0.0520028	0.0457822	0.0271154	0.0188187	0.0705572	0.0637221
0.641	0.0375883	0.0349583	0.0337558	0.0267321	0.0215492	0.0101416	0.026236	0.0164166	0.00933408	0.0131195	0.0175705	0.0176976		0.641	0.142176	0.0685222	0.0207672	0.0383836	0.0320662	0.046126	0.0527625	0.0471019	0.026574	0.0186402	0.0706572	0.0642382
0.642	0.0378342	0.0346769	0.0330776	0.0267183	0.0212906	0.0102852	0.0265175	0.0160493	0.00943694	0.0133903	0.0167578	0.0178314		0.642	0.141364	0.068722	0.0203617	0.0380628	0.0317745	0.0452605	0.0535399	0.0485498	0.0261272	0.0181467	0.0706775	0.0648627
0.643	0.0377077	0.0343133	0.0324072	0.0266134	0.0210633	0.0103973	0.0268063	0.0156886	0.00953169	0.0136536	0.0157965	0.0178994		0.643	0.139701	0.0689126	0.019974	0.0372887	0.0315734	0.0442875	0.0541779	0.0506178	0.0257251	0.0174765	0.0705744	0.0657149
0.644	0.0374649	0.0339704	0.0316967	0.0263939	0.0208645	0.0104448	0.0270537	0.0153024	0.00958112	0.0138988	0.0150065	0.0178828		0.644	0.137563	0.0690127	0.0196714	0.0362234	0.0313783	0.0432229	0.0547346	0.0524107	0.0252708	0.0167528	0.070313	0.066733
0.645	0.0370906	0.0337177	0.030907	0.026144	0.0207137	0.010406	0.0272403	0.0148413	0.00958892	0.0141982	0.0145049	0.0178432		0.645	0.135161	0.0689904	0.0194231	0.0349158	0.0310956	0.0420159	0.0553168	0.053471	0.0247497	0.0160421	0.0699695	0.0677434
0.646	0.0365365	0.0335589	0.0301505	0.0259634	0.0206199	0.010317	0.0273717	0.0142417	0.00959446	0.0146265	0.0142058	0.0178487		0.646	0.132836	0.0688926	0.0191986	0.0334103	0.0306602	0.0405666	0.0561181	0.053801	0.0242603	0.0153774	0.0697313	0.0687423
0.647	0.0357028	0.0335195	0.0295719	0.0259003	0.0206058	0.0102282	0.027464	0.0135736	0.00958366	0.0151552	0.0140722	0.0179585		0.647	0.131167	0.0687419	0.0189216	0.0318507	0.0301799	0.0387324	0.0571729	0.0536315	0.0238891	0.0148855	0.0696915	0.0699046
0.648	0.0347013	0.0335953	0.029312	0.0259356	0.0206095	0.0101467	0.0275099	0.0129953	0.00946712	0.0157326	0.0141158	0.0181758		0.648	0.130783	0.0684605	0.0185936	0.0304361	0.0297483	0.036656	0.0583094	0.0533924	0.0236342	0.0148073	0.0698498	0.0710457
0.649	0.0339331	0.0337788	0.0292855	0.0259369	0.0205303	0.0100452	0.0274904	0.012585	0.00910581	0.0163441	0.0143098	0.0183953		0.649	0.131627	0.0679659	0.0182644	0.0293398	0.0294002	0.0347622	0.0594281	0.0532984	0.0233936	0.0151932	0.0701717	0.0717051
0.65	0.0337833	0.0340813	0.0292018	0.0257644	0.020372	0.00989373	0.0274038	0.012364	0.00851499	0.0169769	0.0145641	0.0185057		0.65	0.132929	0.0673295	0.0179292	0.0286652	0.0292379	0.0331926	0.0604923	0.0533192	0.0231374	0.0158741	0.070647	0.0718098
0.651	0.0342678	0.0344391	0.0289235	0.0253892	0.0201541	0.00968419	0.0272775	0.01229	0.00784484	0.0176168	0.0148026	0.0184784		0.651	0.133814	0.066712	0.0175558	0.0283426	0.0292576	0.0317605	0.0615095	0.0534108	0.022916	0.0165513	0.0712609	0.0715189
0.652	0.0350684	0.0347269	0.028452	0.0248523	0.0198802	0.00946166	0.0271343	0.0122886	0.00724928	0.0182282	0.0149887	0.0183319		0.652	0.133403	0.0661728	0.0171708	0.0281663	0.0293054	0.0303198	0.0625439	0.0534251	0.0227962	0.0170506	0.0719493	0.0710162
0.653	0.0358488	0.0348916	0.0278603	0.0241913	0.0195942	0.00930902	0.0269835	0.0123783	0.00680847	0.0187628	0.0150848	0.0180847		0.653	0.131172	0.0657205	0.0167894	0.0280419	0.029302	0.028824	0.0635947	0.0532487	0.022749	0.0172868	0.0728025	0.070694
0.654	0.0364154	0.0349605	0.0271988	0.0234568	0.0193391	0.00925918	0.0268611	0.0127018	0.00645497	0.0192207	0.0150286	0.0178006		0.654	0.127417	0.0654375	0.0163717	0.0279816	0.0292474	0.0273227	0.064579	0.0529702	0.0227425	0.0172441	0.074001	0.0709142
0.655	0.036728	0.034978	0.0265028	0.0227299	0.0191264	0.00925081	0.026809	0.0132277	0.00611545	0.0196644	0.0147703	0.0176213		0.655	0.12284	0.0653496	0.0158707	0.0279137	0.029104	0.0258891	0.0654682	0.0526227	0.0227331	0.0171284	0.0755333	0.0714497
0.656	0.0368472	0.0349687	0.0257999	0.0221198	0.0189761	0.00919135	0.0268533	0.013777	0.00575311	0.0201265	0.0143637	0.0176002		0.656	0.118442	0.0653263	0.0152627	0.0277152	0.0288574	0.0245971	0.0662985	0.0520962	0.0226223	0.0171572	0.0772452	0.0718537
0.657	0.0367862	0.0349848	0.0251081	0.0216717	0.0189166	0.00904066	0.0270207	0.0142854	0.00539025	0.0205908	0.0138803	0.0176414		0.657	0.115589	0.0651874	0.0145472	0.027469	0.0285164	0.0234963	0.067235	0.0514207	0.0224262	0.0174092	0.0790246	0.0721456
0.658	0.0365538	0.0351099	0.0244813	0.0213423	0.0189347	0.00882661	0.0272661	0.0148108	0.00505318	0.0210185	0.0134221	0.0177656		0.658	0.114513	0.0648925	0.0137844	0.0273284	0.0280955	0.0225786	0.068366	0.0507377	0.0222371	0.0177931	0.080964	0.0724776
0.659	0.0363465	0.0353901	0.023979	0.0210908	0.0189756	0.00859155	0.0274431	0.0153275	0.0047662	0.0213736	0.0132264	0.0181315		0.659	0.114435	0.0645073	0.0131148	0.0272373	0.0276156	0.0218421	0.0692789	0.0500396	0.0221434	0.0181949	0.0831918	0.0728063
0.66	0.0363418	0.0358257	0.0236672	0.0208979	0.0189909	0.00836247	0.0275137	0.0157491	0.00455565	0.0216669	0.013381	0.0187108		0.66	0.114693	0.0641149	0.0126038	0.0270716	0.0271524	0.0213014	0.0698451	0.0493037	0.0221327	0.0185815	0.0856063	0.0732117
0.661	0.0365635	0.0364091	0.0235125	0.02074	0.0189397	0.00815304	0.0274791	0.0160417	0.00443041	0.0219464	0.0137285	0.0193338		0.661	0.11495	0.063757	0.0122018	0.026824	0.0268131	0.0209087	0.0701245	0.0486432	0.0221138	0.0189395	0.0879747	0.0738874
0.662	0.0369367	0.0370813	0.0233816	0.0205984	0.0188091	0.00798515	0.0273221	0.0162705	0.00438679	0.0222377	0.0141922	0.0199059		0.662	0.114953	0.0633872	0.0118612	0.026597	0.0266396	0.0205878	0.0701423	0.0481588	0.0219759	0.0192387	0.0903107	0.0747714
0.663	0.0372871	0.0377043	0.0231543	0.0204026	0.0186297	0.00788506	0.0271715	0.0165989	0.00434632	0.0225316	0.0148114	0.0204801		0.663	0.114489	0.0630541	0.0115539	0.02641	0.0265919	0.0202979	0.0701623	0.0479452	0.0216684	0.019433	0.0928154	0.0756481
0.664	0.0373948	0.0381986	0.0227985	0.0200928	0.0184255	0.00784101	0.0270749	0.0171988	0.00416327	0.0228424	0.0155806	0.0211116		0.664	0.113317	0.0628051	0.0112793	0.026107	0.0265934	0.0200452	0.0701125	0.04813	0.0212553	0.0194789	0.0954987	0.0763096
0.665	0.0372006	0.0385862	0.0223821	0.0196443	0.0182198	0.0078251	0.0270053	0.0180337	0.00380635	0.0232057	0.0164056	0.021782		0.665	0.111266	0.0625325	0.011045	0.0255663	0.0266585	0.0197981	0.069753	0.0485034	0.0208695	0.0193392	0.0981985	0.0766539
0.666	0.0368046	0.0388625	0.0219862	0.0190596	0.0180386	0.00782895	0.026943	0.0188203	0.00335678	0.0236407	0.0171583	0.0225352		0.666	0.108282	0.0621477	0.0108534	0.0248515	0.0267988	0.0195091	0.0692171	0.0486071	0.0206135	0.0189949	0.100878	0.076751
0.667	0.0363112	0.0389638	0.0217416	0.018406	0.0179031	0.00783969	0.0268725	0.0193513	0.00297277	0.0241414	0.0176779	0.0234008		0.667	0.104687	0.0617364	0.0106965	0.0240552	0.0268723	0.0191846	0.0689074	0.048095	0.0205315	0.0184496	0.103525	0.0766066
0.668	0.035785	0.0388495	0.0217176	0.0177348	0.0178276	0.00781848	0.0267689	0.0196177	0.00270529	0.0246562	0.017929	0.0243146		0.668	0.101304	0.0613989	0.0105992	0.0231533	0.0267683	0.0188924	0.0689612	0.0471066	0.0205405	0.0177269	0.106131	0.0762039
0.669	0.0353314	0.0384858	0.0218907	0.0170624	0.0177989	0.00777261	0.0266327	0.0197437	0.0024854	0.0251301	0.0181474	0.0251057		0.669	0.0987096	0.0611663	0.0106292	0.0220833	0.0265442	0.0186623	0.0692627	0.0461386	0.0204555	0.0169134	0.108648	0.0755828
0.67	0.0350788	0.0379251	0.0222425	0.0164357	0.017757	0.00769809	0.026426	0.0198777	0.00227869	0.0255464	0.0186661	0.0256393		0.67	0.0971087	0.0609876	0.0109032	0.0209345	0.0263292	0.0184759	0.0695933	0.0455156	0.0202233	0.0161268	0.110932	0.0747951
0.671	0.0352073	0.0373358	0.0227027	0.0158593	0.0176623	0.0075381	0.026124	0.0201469	0.00208529	0.025837	0.0194929	0.0259427		0.671	0.0966679	0.0607838	0.011595	0.0199645	0.0261141	0.0183316	0.0696094	0.0451573	0.0199213	0.015429	0.112793	0.0739884
0.672	0.0357306	0.0368254	0.0231536	0.0153263	0.0174955	0.00729986	0.0257521	0.0206354	0.00195172	0.0259607	0.0204244	0.0261461		0.672	0.0970459	0.0605598	0.0129328	0.0194073	0.0257508	0.0182571	0.0691979	0.0448504	0.0196501	0.0148393	0.11428	0.0733599
0.673	0.0365358	0.0364615	0.0235571	0.0149121	0.0172645	0.0070364	0.0253199	0.0213093	0.00189413	0.0259804	0.021377	0.0264475		0.673	0.0975189	0.0603351	0.0148822	0.0193162	0.0252077	0.0182703	0.068549	0.044162	0.0194149	0.0143725	0.115771	0.0726961
0.674	0.0374922	0.0362986	0.0239758	0.0146541	0.0169949	0.00678165	0.0248904	0.0220014	0.00191604	0.0259647	0.0223619	0.0269648		0.674	0.0976701	0.0600763	0.0171532	0.0195165	0.0245519	0.0183553	0.0678367	0.0423214	0.0191506	0.0140439	0.11744	0.0718037
0.675	0.0384466	0.0362518	0.0244888	0.0144561	0.0167099	0.00659327	0.0245453	0.0226258	0.00199493	0.0259087	0.0233039	0.0276863		0.675	0.0974372	0.0598099	0.0196277	0.0197916	0.0238672	0.0184818	0.0670947	0.0400331	0.0188762	0.0138495	0.119156	0.070923
0.676	0.0392827	0.0362007	0.0250165	0.014216	0.0164319	0.00653352	0.0242564	0.0232807	0.00208215	0.0257618	0.024152	0.0285941		0.676	0.0968902	0.0595789	0.0223304	0.0201073	0.0232902	0.0186133	0.0661956	0.0380968	0.0186954	0.0137888	0.12078	0.0703566
0.677	0.039747	0.0361094	0.02532	0.013911	0.0162016	0.00656365	0.0239152	0.0241433	0.00212396	0.0254904	0.0249949	0.0296729		0.677	0.0959304	0.0594104	0.0252782	0.0205343	0.0229227	0.0187154	0.0649811	0.0366452	0.0185725	0.0137668	0.122142	0.0700149
0.678	0.0396906	0.0359536	0.0253178	0.0135385	0.0160704	0.00658791	0.023473	0.0252671	0.00209948	0.0251525	0.0258703	0.0307817		0.678	0.0944534	0.0593356	0.0284908	0.0210498	0.0227235	0.0187612	0.0635185	0.0353143	0.0183697	0.0136139	0.123141	0.0694642
0.679	0.0391259	0.0357286	0.0251131	0.0131332	0.0160567	0.00657637	0.02298	0.026563	0.00204737	0.024819	0.0268285	0.0317754		0.679	0.0927067	0.059375	0.0318286	0.0215807	0.0226248	0.0187355	0.0620211	0.0340451	0.0180151	0.0131997	0.123819	0.0686405
0.68	0.0381403	0.0353545	0.0248379	0.0127839	0.0160984	0.0065561	0.0225042	0.0278926	0.00209882	0.0244872	0.0279255	0.0326035		0.68	0.091279	0.0594914	0.0349999	0.0220277	0.0226227	0.0186382	0.0605483	0.0332873	0.0175283	0.0125549	0.124167	0.0679389
0.681	0.0368905	0.0347575	0.02464	0.0125278	0.0161141	0.00655739	0.0220817	0.0290958	0.00230056	0.0241657	0.029154	0.0333534		0.681	0.0904805	0.059611	0.0380419	0.0223834	0.0226307	0.018489	0.0590385	0.0331918	0.0169327	0.0117413	0.124066	0.0674676
0.682	0.0355532	0.034051	0.0245572	0.0123425	0.0161004	0.0065885	0.0217396	0.0301018	0.0025974	0.0238826	0.03047	0.0341671		0.682	0.0904618	0.0596897	0.0413069	0.0226195	0.0225884	0.0183423	0.0574637	0.0332432	0.0162848	0.0108734	0.123609	0.0670302
0.683	0.0343456	0.0334394	0.0245642	0.0121978	0.0160863	0.00659207	0.0214803	0.0309644	0.00295248	0.0236686	0.0318369	0.0351519		0.683	0.0912638	0.0597102	0.0449524	0.0227246	0.0225781	0.0182639	0.0558761	0.0331821	0.0156838	0.0101669	0.123127	0.0664708
0.684	0.0334674	0.0330397	0.0245658	0.0120883	0.0160607	0.00648221	0.0213366	0.0317445	0.00333904	0.0235229	0.0332586	0.0363789		0.684	0.0924129	0.0596185	0.0489528	0.0227615	0.0225983	0.0182772	0.0543609	0.0332259	0.0151834	0.00982072	0.122709	0.065646
0.685	0.0330723	0.0328557	0.0245355	0.0120158	0.0160069	0.00623219	0.0212931	0.032437	0.00376477	0.0234174	0.0347983	0.0377606		0.685	0.093033	0.0593295	0.0209345	0.0227357	0.0225655	0.0183557	0.0529339	0.0332169	0.0147403	0.00983018	0.1222	0.0644936
0.686	0.0332249	0.0328669	0.0245067	0.0119619	0.015918	0.0059038	0.0213369	0.033085	0.00427868	0.0233373	0.0364141	0.0390722		0.686	0.0927318	0.0588723	0.0199645	0.0226483	0.0224778	0.0184736	0.0515294	0.0328801	0.0143418	0.00983314	0.12137	0.0632878
0.687	0.033831	0.0330063	0.0245162	0.0118893	0.0157964	0.00558431	0.0214399	0.0337753	0.00493788	0.0232778	0.0379877	0.0401718		0.687	0.0917161	0.0584099	0.0194073	0.0225748	0.0224151	0.0186281	0.0501003	0.0322754	0.0140361	0.00956094	0.120105	0.0623411
0.688	0.034567	0.0331264	0.0245556	0.0118007	0.0156495	0.00533484	0.0215376	0.0345164	0.00574737	0.0232323	0.0394533	0.041108		0.688	0.0900849	0.058092	0.0193162	0.0225813	0.0224301	0.0188203	0.0485222	0.0315301	0.0138114	0.00901299	0.118533	0.0616192
0.689	0.0351054	0.0331244	0.0245778	0.0117498	0.0155	0.00515302	0.0216221	0.0352787	0.00666012	0.0231915	0.0408308	0.0419575		0.689	0.0881293	0.0578579	0.0195165	0.0227119	0.02251	0.0190213	0.0467135	0.0308199	0.0135958	0.00844968	0.11678	0.0609106
0.69	0.0352982	0.0329749	0.0245559	0.0117777	0.0154073	0.00500344	0.0217384	0.03615	0.00760331	0.0231462	0.0422035	0.0427393		0.69	0.0863063	0.0575291	0.0197916	0.0230541	0.0226608	0.0191827	0.0451361	0.0303668	0.0132939	0.00796573	0.114882	0.0601034
0.691	0.0351215	0.0326911	0.0244682	0.0118758	0.0154123	0.00485754	0.0218683	0.0372375	0.00853169	0.0230933	0.0436513	0.0435352		0.691	0.0848577	0.0570748	0.0201073	0.0237073	0.0228481	0.0192839	0.0439643	0.0301446	0.0128937	0.00747962	0.112805	0.0590489
0.692	0.0346237	0.0323343	0.0243346	0.0119984	0.0154985	0.00469152	0.021994	0.0385362	0.00940003	0.0230226	0.0452155	0.0443902		0.692	0.0838968	0.0565651	0.0205343	0.0246599	0.0229899	0.0193376	0.042989	0.0299366	0.0124484	0.00702809	0.110493	0.0576659
0.693	0.0339037	0.0319771	0.0241837	0.0120629	0.015594	0.00453021	0.022064	0.0399479	0.0102018	0.022961	0.0468333	0.0453178		0.693	0.0835741	0.0560442	0.0210498	0.0257894	0.023094	0.0193626	0.0419872	0.0296791	0.0120196	0.00675678	0.107897	0.0560926
0.694	0.0331322	0.0317204	0.0240315	0.0120891	0.0156375	0.00445097	0.022049	0.0413839	0.0109689	0.0229554	0.0483488	0.0463862		0.694	0.0841383	0.0554646	0.0215807	0.0269658	0.023222	0.0193716	0.04085	0.0294083	0.0116763	0.00681557	0.104971	0.0545715
0.695	0.0325091	0.0316057	0.0238525	0.0121777	0.0156381	0.00449808	0.0220119	0.0428001	0.0117541	0.0230095	0.0497206	0.0477179		0.695	0.0856926	0.0548356	0.0220277	0.0281188	0.02337	0.0193708	0.0397541	0.0289973	0.0114183	0.0071467	0.101758	0.0533034
0.696	0.0320934	0.0315726	0.0235837	0.0123408	0.0156054	0.00460436	0.0220409	0.0442022	0.0125769	0.0231084	0.0510249	0.0492713		0.696	0.0880791	0.0542874	0.0209345	0.0291811	0.0234617	0.0194256	0.0389383	0.0283307	0.0111765	0.00759832	0.0983813	0.0523619
0.697	0.0318174	0.031578	0.0232486	0.0125269	0.0155246	0.0046553	0.0221909	0.0457375	0.0134445	0.0232442	0.0523614	0.0508325		0.697	0.0908602	0.0538966	0.0199645	0.0300283	0.0235077	0.0196177	0.0382959	0.0276321	0.01093	0.00808698	0.0949597	0.0516157
0.698	0.0316421	0.0316193	0.022963	0.0126999	0.0154177	0.00457887	0.0224617	0.0475423	0.0143465	0.0234104	0.0538529	0.0523538		0.698	0.093378	0.0535879	0.0194073	0.030577	0.0236434	0.0199486	0.0376046	0.0274121	0.0107061	0.00856299	0.0916352	0.0510085
0.699	0.0314825	0.0316829	0.0228298	0.0128966	0.0153445	0.00436697	0.0228453	0.0495693	0.0152479	0.0236079	0.0554553	0.0539553		0.699	0.0953057	0.0532473	0.0193162	0.0309421	0.0238507	0.020348	0.0369417	0.0277721	0.0105512	0.00900113	0.0884558	0.0506107
0.7	0.031255	0.031809	0.0228395	0.0131849	0.0153348	0.00403399	0.0233593	0.0516765	0.0161305	0.023859	0.0570224	0.0557298		0.7	0.0964268	0.0528291	0.0195165	0.0313408	0.023986	0.0207433	0.036433	0.0281419	0.0105414	0.00940237	0.0853389	0.0503637
0.701	0.0309605	0.0320969	0.0228955	0.0135426	0.0153731	0.00367424	0.0240193	0.0538058	0.0169997	0.0242182	0.0585341	0.0576089		0.701	0.0965902	0.0523217	0.0197916	0.0318829	0.0240022	0.0210924	0.0360386	0.0280356	0.0106855	0.00980025	0.0823033	0.0502373
0.702	0.030547	0.0325479	0.0229529	0.0139038	0.0154109	0.00339165	0.0247733	0.0559372	0.0178868	0.0247466	0.0601134	0.0595065		0.702	0.095949	0.0517424	0.0201073	0.0325466	0.0240451	0.0213536	0.0357624	0.0276949	0.0108894	0.010286	0.0795712	0.0501703
0.703	0.030067	0.0330468	0.0230053	0.0142177	0.0154464	0.00319721	0.0255602	0.0580782	0.0188307	0.0253956	0.0619482	0.0614237		0.703	0.0950524	0.0511811	0.0205343	0.0331948	0.0242709	0.0215184	0.0355605	0.0275934	0.0109807	0.0109257	0.0771697	0.0500832
0.704	0.0296194	0.0334342	0.0230048	0.0143921	0.0154779	0.00305098	0.0263862	0.0602476	0.0198206	0.0260666	0.0641537	0.0633483		0.704	0.0947704	0.0507843	0.0210498	0.033703	0.0246431	0.0215915	0.0352814	0.0279514	0.010951	0.0117707	0.0748488	0.0500442
0.705	0.0291892	0.0336149	0.0229091	0.0143974	0.0154974	0.00294843	0.0272203	0.0624942	0.0207697	0.0267196	0.0667087	0.0652721		0.705	0.0954286	0.0506329	0.0215807	0.0341368	0.0250238	0.0215677	0.0348647	0.028715	0.0109248	0.0127098	0.0724493	0.0500565
0.706	0.0287531	0.0336575	0.0227158	0.0142803	0.0155415	0.0028775	0.0280493	0.0647772	0.0216564	0.0273854	0.0694144	0.067234		0.706	0.0969158	0.0506661	0.0220277	0.0346583	0.0252867	0.0214581	0.0344076	0.0294352	0.0109317	0.0136128	0.0700434	0.0500223
0.707	0.0284081	0.033664	0.0224798	0.0141105	0.015615	0.00278881	0.028907	0.0668676	0.0225309	0.0280839	0.0720088	0.069264		0.707	0.0991223	0.0507495	0.0209345	0.0352481	0.0253559	0.0213036	0.0340667	0.029856	0.010894	0.0144239	0.0677814	0.0499103
0.708	0.028224	0.0336501	0.0222717	0.0139814	0.0156644	0.00270126	0.029837	0.0687799	0.0234847	0.0288092	0.0743882	0.0712898		0.708	0.101987	0.0507779	0.0199645	0.0357048	0.0252733	0.0211529	0.0339307	0.0301277	0.010807	0.0151138	0.0657787	0.0496632
0.709	0.0281771	0.0336291	0.0219754	0.0139091	0.0156459	0.00267371	0.0308448	0.0706419	0.024606	0.0295825	0.07655	0.0732495		0.709	0.105331	0.0507318	0.0194073	0.0358798	0.0251252	0.0210447	0.0338926	0.030456	0.0107489	0.0156694	0.0640335	0.0493444
0.71	0.0282521	0.0336101	0.0214865	0.0138214	0.0155758	0.00264414	0.0318668	0.0725354	0.0259881	0.0304705	0.0784914	0.0751294		0.71	0.108538	0.0506414	0.0193162	0.0357565	0.0249261	0.020994	0.0337248	0.0306588	0.0108095	0.0160701	0.0624562	0.0489849
0.711	0.0284835	0.033623	0.0208597	0.0136844	0.0155384	0.00249489	0.0329352	0.0744929	0.0275862	0.0315221	0.0803139	0.0770648		0.711	0.1106	0.0505114	0.0195165	0.0354545	0.0246399	0.0209921	0.0334364	0.0301796	0.0110292	0.0163935	0.0611042	0.0486086
0.712	0.0288534	0.0337361	0.0201662	0.0135258	0.0155903	0.00221547	0.0340027	0.0765651	0.0292079	0.032699	0.0820912	0.0791956		0.712	0.110647	0.0503076	0.0197916	0.0350294	0.0242654	0.0209924	0.0331529	0.0290716	0.0113715	0.0167886	0.0600863	0.0483072
0.713	0.029314	0.0339614	0.0194671	0.0133847	0.0156939	0.00188854	0.0350403	0.0788154	0.030698	0.0339303	0.0838376	0.0815033		0.713	0.108801	0.0500272	0.0201073	0.0345299	0.0238577	0.0209631	0.0329954	0.0281142	0.0117692	0.0172874	0.0593128	0.0481995
0.714	0.0298814	0.0342132	0.0187839	0.013277	0.015784	0.00161509	0.0361163	0.081295	0.031989	0.0351359	0.0856255	0.0839275		0.714	0.106179	0.0497302	0.0205343	0.0340547	0.0234273	0.0209088	0.0329577	0.0274692	0.0121188	0.0177821	0.0584676	0.0482988
0.715	0.0304958	0.0343559	0.018123	0.0131909	0.0158263	0.00147748	0.0372388	0.0840057	0.0330651	0.0362591	0.0874869	0.0864233		0.715	0.104105	0.0495156	0.0210498	0.0336368	0.0229413	0.0208396	0.0329157	0.0266174	0.0123907	0.0182799	0.0573773	0.0485267
0.716	0.030889	0.0343075	0.0174426	0.0131193	0.0158073	0.00149691	0.0383616	0.0867827	0.0339892	0.0372931	0.0893791	0.0889772		0.716	0.103541	0.0494472	0.0215807	0.0333521	0.0223998	0.0207636	0.0328385	0.025633	0.0125705	0.018849	0.0560647	0.0488668
0.717	0.030878	0.0340655	0.0166946	0.0130686	0.0157586	0.00160759	0.0394295	0.089407	0.0348428	0.0382559	0.0913442	0.091662		0.717	0.104521	0.0494476	0.0220277	0.0333695	0.0218083	0.0206589	0.032772	0.0249243	0.0126444	0.0197061	0.0546877	0.0492419
0.718	0.0304394	0.0337398	0.015839	0.013045	0.0157377	0.0017221	0.0404468	0.0918464	0.0356892	0.0392101	0.0934879	0.094589		0.718	0.106503	0.0493947	0.0209345	0.0337068	0.0211291	0.0204739	0.0327059	0.0246466	0.01264	0.0208726	0.0533596	0.0496066
0.719	0.0297002	0.0334891	0.0148727	0.0130271	0.0158078	0.00179599	0.0414488	0.0942015	0.0366166	0.0402498	0.0958711	0.0977041		0.719	0.108935	0.0492501	0.0199645	0.0342274	0.0203869	0.0201823	0.0326737	0.0248964	0.0125612	0.0221474	0.0521242	0.0499337
0.72	0.0289417	0.0333642	0.0138226	0.0129904	0.0159604	0.00183216	0.0424181	0.0966029	0.0376982	0.0414412	0.0985029	0.10082		0.72	0.11126	0.0490375	0.0194073	0.0347452	0.0196798	0.0198646	0.0327466	0.0255128	0.012421	0.0233085	0.0509765	0.0501999
0.721	0.0283219	0.0333425	0.0127061	0.01292	0.0161009	0.00187596	0.0433706	0.0990369	0.0389323	0.0428213	0.101391	0.103852		0.721	0.112988	0.0488624	0.0193162	0.0350825	0.0190766	0.0195888	0.0329531	0.0260397	0.0122816	0.0242952	0.0499316	0.0503722
0.722	0.0279318	0.0333865	0.0115509	0.0128387	0.0161623	0.00197536	0.0443768	0.101365	0.0402528	0.0443951	0.104601	0.106876		0.722	0.113996	0.0487857	0.0195165	0.0350999	0.0186241	0.0193521	0.0332607	0.0262475	0.0121901	0.0251866	0.0490619	0.0505437
0.723	0.0278513	0.0334335	0.0103748	0.0127956	0.0161442	0.00215326	0.0455067	0.103487	0.041655	0.0461195	0.108067	0.109989		0.723	0.114243	0.0487433	0.0197916	0.0347209	0.0183552	0.0191773	0.0336092	0.0263234	0.0121562	0.0260253	0.0485078	0.0508556
0.724	0.0281121	0.0334329	0.00923666	0.0128278	0.0161079	0.00236364	0.0468338	0.105413	0.0431455	0.0479162	0.111582	0.113267		0.724	0.113825	0.0486766	0.0201073	0.0339414	0.0181831	0.0190944	0.0339814	0.0264813	0.0121546	0.0267737	0.0482683	0.051358
0.725	0.0286664	0.0334157	0.00824389	0.012874	0.0161009	0.00249672	0.0483703	0.10719	0.0447397	0.0497369	0.115015	0.116696		0.725	0.112948	0.0485948	0.0205343	0.0329315	0.0180289	0.0190976	0.0343732	0.0267381	0.0121526	0.0273488	0.0482114	0.0519703
0.726	0.0294023	0.0334163	0.00742563	0.0128351	0.0161111	0.00245621	0.0500338	0.108919	0.0463983	0.0515722	0.118296	0.120154		0.726	0.111734	0.0484976	0.0210498	0.0319205	0.0179324	0.019129	0.0347709	0.0270763	0.0121443	0.0278219	0.0482633	0.0524962
0.727	0.0302088	0.0334157	0.00676984	0.0127182	0.0161164	0.00230804	0.0517037	0.110734	0.0480291	0.0534177	0.12138	0.123777		0.727	0.110387	0.0483639	0.0215807	0.0310179	0.0179031	0.0190985	0.0351918	0.0274483	0.0121695	0.028325	0.04844	0.0528589
0.728	0.0309544	0.0334094	0.00623243	0.012562	0.0161246	0.00221765	0.0532776	0.112677	0.0495546	0.0552485	0.124335	0.127795		0.728	0.109212	0.0482009	0.0220277	0.0302619	0.0178563	0.0189375	0.0356652	0.0277287	0.0122461	0.0289277	0.0487667	0.0531786
0.729	0.0314627	0.0334095	0.00572196	0.0123404	0.0161154	0.00226621	0.0546659	0.114744	0.0510068	0.0570434	0.127363	0.132282		0.729	0.108485	0.0480418	0.0302619	0.0297235	0.0177581	0.0186378	0.0361104	0.0277751	0.0123181	0.0296823	0.0492565	0.0536438
0.73	0.0315865	0.0334524	0.00509074	0.0120391	0.0160321	0.00245441	0.0558867	0.11685	0.0525008	0.0588007	0.130522	0.137117		0.73	0.107908	0.0479242	0.0297235	0.0293802	0.0177088	0.0182265	0.0363803	0.0276627	0.0122563	0.0305866	0.049895	0.0541634
0.731	0.0313896	0.0335179	0.00433501	0.0116902	0.0158606	0.00274386	0.0570281	0.118818	0.0540933	0.0605465	0.133752	0.142154		0.731	0.107354	0.0478211	0.0293802	0.0290785	0.0177693	0.0177615	0.0364074	0.0277236	0.0119895	0.0315907	0.0505873	0.0545344
0.732	0.0310207	0.0335139	0.00359988	0.0114174	0.0156666	0.00308107	0.0581409	0.120674	0.0557829	0.0623055	0.137016	0.147381		0.732	0.106899	0.0477792	0.0290785	0.0286786	0.0178426	0.0173208	0.0363245	0.0282086	0.0115046	0.0325969	0.0512531	0.054746
0.733	0.03052	0.0333801	0.00307124	0.0112632	0.0155454	0.00345747	0.0592587	0.12269	0.0574931	0.0640983	0.140288	0.152764		0.733	0.106296	0.0478549	0.0286786	0.0281454	0.0177936	0.0169774	0.0363384	0.0291402	0.0108484	0.0334898	0.0519008	0.0548665
0.734	0.0299825	0.0331671	0.002781	0.0111422	0.0155426	0.00386736	0.0604433	0.124943	0.0591432	0.0659268	0.143553	0.158168		0.734	0.105347	0.0480273	0.0281454	0.0275412	0.0176312	0.0167559	0.0365339	0.0302941	0.0101505	0.0341948	0.0525599	0.0549987
0.735	0.029581	0.0329767	0.00260998	0.0110048	0.0156595	0.0042701	0.0617084	0.127279	0.060765	0.0677546	0.146773	0.163499		0.735	0.1039	0.048202	0.0275412	0.0269786	0.0174121	0.0166388	0.0369234	0.0314122	0.00950398	0.0346864	0.0532276	0.0552969
0.736	0.0293833	0.0328782	0.00246905	0.0108367	0.0158598	0.00461459	0.0630329	0.129584	0.0624646	0.0695606	0.149832	0.168806		0.736	0.101944	0.0482354	0.0269786	0.0265526	0.0171499	0.0166069	0.037493	0.032466	0.00896605	0.0351493	0.0539504	0.0556673
0.737	0.0293685	0.0328925	0.0022759	0.0106728	0.0160538	0.00486567	0.0643792	0.131814	0.0642863	0.0713431	0.152848	0.174201		0.737	0.099589	0.0480291	0.0265526	0.0262211	0.0169178	0.0166284	0.038203	0.0336722	0.00857753	0.0357779	0.0547538	0.0558064
0.738	0.0294272	0.0330152	0.00210457	0.010523	0.0161752	0.005034	0.0656852	0.134089	0.0661887	0.07315	0.156048	0.179779		0.738	0.0967993	0.0476017	0.0262211	0.0258984	0.0168105	0.0166734	0.0388371	0.0349706	0.00840545	0.0366244	0.0554981	0.0555318
0.739	0.0296076	0.0332042	0.00209965	0.0103239	0.0162216	0.00515819	0.0669387	0.136429	0.0680767	0.0750505	0.159561	0.185579		0.739	0.0933482	0.0470931	0.0258984	0.0254838	0.0168356	0.0167104	0.0392652	0.0363797	0.00844821	0.0377148	0.0560556	0.0549348
0.74	0.0299906	0.0333915	0.00247653	0.0100794	0.016248	0.00526921	0.0681363	0.138734	0.0698854	0.0770432	0.163471	0.191489		0.74	0.0893455	0.0465998	0.0254838	0.0249781	0.0170262	0.016735	0.0395319	0.037995	0.00859225	0.0390592	0.0564967	0.0542271
0.741	0.0304623	0.0335312	0.00323604	0.00986109	0.0163332	0.00543006	0.0693541	0.140872	0.0715438	0.0790771	0.167772	0.197352		0.741	0.0853272	0.0461234	0.0153831	0.0244637	0.0174123	0.0167793	0.0398315	0.0397207	0.00871706	0.0405862	0.0569558	0.0536785
0.742	0.0307923	0.0336355	0.00416766	0.00969385	0.0164977	0.00573608	0.070597	0.142797	0.07307	0.0811729	0.172328	0.203158		0.742	0.0820917	0.0456891	0.0153475	0.0240019	0.017894	0.0168379	0.0402585	0.0414835	0.00875531	0.0421305	0.0574588	0.0533692
0.743	0.0307538	0.033687	0.00514005	0.0095639	0.0167161	0.00619629	0.0719277	0.144546	0.0746048	0.0833837	0.176978	0.208953		0.743	0.0805245	0.0453111	0.0152501	0.0236367	0.0183499	0.0168775	0.0407897	0.0430095	0.00871686	0.0436303	0.0579786	0.0532576
0.744	0.0303039	0.0336212	0.00608971	0.00945882	0.0169717	0.00673361	0.0733505	0.146277	0.0762765	0.0857289	0.181546	0.214699		0.744	0.0805504	0.0449607	0.0151002	0.0234647	0.0187309	0.0168687	0.0413015	0.0440713	0.00856625	0.0451969	0.0584342	0.0532868
0.745	0.0295837	0.0334845	0.00701049	0.00939193	0.0172376	0.00725927	0.0747737	0.148136	0.0781609	0.0882026	0.185963	0.220297		0.745	0.0813508	0.0446134	0.0148987	0.0235024	0.019045	0.0168033	0.0417843	0.0450958	0.00832971	0.0469779	0.0587854	0.0533959
0.746	0.0287678	0.0334299	0.00792601	0.00934791	0.0175238	0.00767274	0.0761555	0.150078	0.0802519	0.0907583	0.190269	0.22578		0.746	0.0822716	0.044232	0.0146518	0.0236583	0.0193828	0.0167215	0.0424262	0.0465463	0.00805771	0.048906	0.0590333	0.0534446
0.747	0.0280796	0.0335146	0.0088873	0.00925374	0.017854	0.00796481	0.0775286	0.152125	0.0824864	0.0933239	0.194431	0.231301		0.747	0.0829143	0.0438186	0.0143872	0.0237599	0.0198394	0.0166601	0.0432984	0.048287	0.00777953	0.0508612	0.0591886	0.0532121
0.748	0.0275533	0.0336527	0.00993157	0.00906664	0.0181762	0.00821434	0.07895	0.154408	0.0847585	0.095917	0.198383	0.236997		0.748	0.0830968	0.043447	0.0141645	0.0236562	0.0204074	0.0166462	0.0442782	0.0500494	0.0074636	0.0526683	0.0593961	0.0527712
0.749	0.0272103	0.0337123	0.0110762	0.00879058	0.018382	0.00844131	0.0803954	0.156925	0.0869599	0.0986246	0.20212	0.242755		0.749	0.0828274	0.0431781	0.0140205	0.0233497	0.0210257	0.0167118	0.0453308	0.0516491	0.0071299	0.0542772	0.0598252	0.0523612
0.75	0.0271903	0.0337004	0.0123207	0.00846639	0.0183894	0.00864167	0.081789	0.159536	0.0889792	0.101439	0.205757	0.248548		0.75	0.0823037	0.0430254	0.0139715	0.0228553	0.0216294	0.016859	0.0465079	0.0530851	0.00684991	0.055794	0.0604759	0.0521781
0.751	0.0274746	0.0337818	0.0135924	0.00814685	0.0182211	0.00885523	0.0831288	0.161989	0.0907655	0.1043	0.209464	0.254546		0.751	0.0816254	0.0430413	0.0139591	0.0222166	0.0221379	0.0170513	0.0476913	0.054617	0.00664694	0.0573739	0.0612361	0.0523119
0.752	0.0279799	0.0342611	0.0147797	0.0078464	0.0180215	0.00910767	0.0844612	0.164122	0.0923729	0.10716	0.213298	0.260692		0.752	0.0806897	0.043213	0.0139119	0.0215351	0.0225105	0.0172527	0.0486026	0.0562885	0.00650944	0.059099	0.0619871	0.0527429
0.753	0.028525	0.0352074	0.0158154	0.00753217	0.0179159	0.00941053	0.0857868	0.166035	0.0939562	0.109974	0.217083	0.266679		0.753	0.0794945	0.0434198	0.0138253	0.0208615	0.0227705	0.0174299	0.0492086	0.0579697	0.00646459	0.0609034	0.0627462	0.053345
0.754	0.0288306	0.0364445	0.0166596	0.00716258	0.0180115	0.00973224	0.0870497	0.167935	0.09559	0.112793	0.220727	0.272143		0.754	0.0781382	0.0435977	0.0136922	0.0202377	0.0229529	0.0175783	0.0497343	0.0596799	0.00649368	0.062698	0.0635892	0.0538804
0.755	0.0287083	0.0377731	0.0173003	0.00675316	0.0183472	0.0100267	0.0882024	0.169956	0.0972697	0.115675	0.224445	0.277158		0.755	0.0766213	0.0437656	0.0134997	0.0196809	0.0231191	0.0177342	0.0503016	0.0613977	0.00651817	0.064366	0.0644722	0.0542449
0.756	0.0281199	0.038915	0.0177426	0.0063628	0.0188632	0.0102961	0.0892326	0.172207	0.0990061	0.11858	0.22847	0.282195		0.756	0.0748926	0.0439606	0.013276	0.0192216	0.023271	0.01789	0.0509125	0.0630941	0.00652282	0.0659051	0.0652976	0.0545101
0.757	0.0272047	0.0394807	0.0180741	0.00599813	0.0194438	0.0106138	0.0902136	0.174722	0.100904	0.121459	0.2329	0.287453		0.757	0.0731566	0.0441496	0.0130418	0.018887	0.0232804	0.0180103	0.0515212	0.0648562	0.00654312	0.0674334	0.0660088	0.054813
0.758	0.026081	0.0394144	0.0183678	0.0056147	0.0199801	0.0110174	0.0912976	0.17739	0.103128	0.124296	0.237676	0.292717		0.758	0.0717167	0.0443068	0.0128304	0.018728	0.0230697	0.0180949	0.0520827	0.0668006	0.00654522	0.0690825	0.0666429	0.0551995
0.759	0.0248542	0.0390646	0.0186402	0.00522631	0.0204369	0.0114673	0.0925308	0.180024	0.105775	0.127116	0.24268	0.297839		0.759	0.070939	0.0444478	0.0126676	0.0187654	0.0227546	0.0181923	0.0526258	0.0687933	0.00647771	0.0709178	0.0671679	0.0556101
0.76	0.0236868	0.0386734	0.0189352	0.0048851	0.020849	0.0119398	0.0939223	0.182525	0.10882	0.129972	0.247715	0.302659		0.76	0.0710488	0.0445748	0.0125584	0.0189446	0.0224624	0.0183878	0.0532602	0.070623	0.00635586	0.0729403	0.067483	0.0558446
0.761	0.0227984	0.0382753	0.0193488	0.00459436	0.0212596	0.0124359	0.0953798	0.184972	0.112086	0.132898	0.252738	0.306938		0.761	0.0721309	0.0446659	0.0125165	0.0191735	0.0221976	0.0187223	0.0539418	0.072054	0.0063167	0.0751241	0.067676	0.0557645
0.762	0.0222439	0.0379116	0.0199288	0.00433382	0.0216843	0.0129809	0.0967112	0.187489	0.115387	0.135882	0.257812	0.310653		0.762	0.0738939	0.0448151	0.0125256	0.0193775	0.0219999	0.0191776	0.0544609	0.073086	0.0064357	0.0773424	0.0680571	0.0555539
0.763	0.0219136	0.0376205	0.020577	0.00400628	0.0220961	0.0135988	0.0978612	0.190027	0.118563	0.138854	0.26302	0.314024		0.763	0.0756703	0.0450637	0.012541	0.0195008	0.021922	0.0196924	0.0546772	0.074066	0.00671329	0.0793318	0.0687445	0.0553973
0.764	0.0217256	0.0373854	0.0210789	0.00355818	0.0224564	0.0142908	0.0988689	0.192361	0.121522	0.14179	0.268513	0.317177		0.764	0.0768188	0.0452849	0.0125256	0.0194869	0.0218956	0.0201866	0.0546771	0.0749754	0.00713268	0.081039	0.0696172	0.0553568
0.765	0.0215542	0.037141	0.0214041	0.00309357	0.0227038	0.0150643	0.0998159	0.194406	0.124245	0.144773	0.274207	0.320232		0.765	0.0770082	0.0453105	0.0124444	0.0193277	0.0218416	0.0206057	0.0547335	0.0757253	0.00766011	0.0826682	0.0704574	0.0554318
0.766	0.0212649	0.0368642	0.0216873	0.00276199	0.0228026	0.0159441	0.100796	0.196442	0.126688	0.147922	0.279827	0.323315		0.766	0.0762961	0.045137	0.0122871	0.0190219	0.021785	0.0209136	0.0549718	0.0764332	0.00826811	0.084353	0.0711488	0.0555957
0.767	0.020819	0.0365283	0.0219787	0.00262075	0.0227982	0.0169271	0.101851	0.198896	0.128889	0.151287	0.285367	0.326459		0.767	0.0751431	0.0449579	0.0120402	0.0185367	0.021796	0.0210998	0.0552007	0.0772952	0.00889709	0.0860554	0.0717478	0.0560176
0.768	0.0201514	0.0361034	0.0222741	0.00262094	0.0227849	0.0179755	0.102937	0.201761	0.130961	0.154816	0.291061	0.329674		0.768	0.0743226	0.0449494	0.0117057	0.0179265	0.0218738	0.0212099	0.0551521	0.0781786	0.00945538	0.087599	0.0722975	0.0568515
0.769	0.0192446	0.0355748	0.0224976	0.00266316	0.0228491	0.0190167	0.104047	0.204872	0.133026	0.158443	0.296986	0.332973		0.769	0.0744112	0.0451272	0.0113483	0.0173522	0.0219661	0.0213178	0.0549231	0.0788075	0.00985394	0.0889293	0.0727583	0.0581212
0.77	0.018112	0.0350274	0.0225858	0.00268825	0.0230179	0.0199465	0.105189	0.207924	0.135269	0.162123	0.302951	0.33634		0.77	0.0757878	0.0454283	0.0110322	0.0170186	0.0220634	0.0214493	0.054698	0.0789517	0.01007	0.0901248	0.0731572	0.0597434
0.771	0.0168572	0.0346086	0.022498	0.00269514	0.023243	0.0207402	0.106358	0.210793	0.137887	0.165913	0.30877	0.339848		0.771	0.0787481	0.045755	0.0107625	0.0170213	0.0220943	0.021554	0.0546273	0.0788013	0.0101729	0.0913411	0.073544	0.0614887
0.772	0.0157057	0.0344002	0.0222537	0.00270708	0.0234384	0.0214564	0.107482	0.213615	0.140872	0.169948	0.314369	0.343581		0.772	0.082775	0.0460137	0.0104964	0.0173384	0.0219763	0.0215761	0.0546352	0.0788955	0.0102511	0.0927258	0.0738744	0.0631223
0.773	0.0149263	0.0343445	0.0219742	0.00274369	0.0235477	0.022105	0.108467	0.216545	0.144011	0.174257	0.319806	0.347319		0.773	0.0867026	0.0461841	0.0102142	0.0179051	0.0217246	0.0215293	0.0545456	0.0795409	0.010412	0.0943944	0.0740859	0.0645771
0.774	0.0147037	0.0343016	0.0217644	0.00279433	0.0235707	0.0226572	0.109321	0.219611	0.147132	0.178683	0.325184	0.350828		0.774	0.089537	0.0463097	0.00992706	0.0185113	0.0214274	0.0214956	0.0544175	0.0806714	0.0106973	0.0962468	0.0742189	0.0659294
0.775	0.0150106	0.0342235	0.0217064	0.00283683	0.0235327	0.0231244	0.11017	0.222542	0.150101	0.183043	0.330491	0.354161		0.775	0.0906456	0.0464332	0.00967776	0.0187887	0.0211799	0.0215243	0.0544964	0.0819728	0.011121	0.0979264	0.0743557	0.0673501
0.776	0.0156623	0.0341266	0.0218417	0.00284127	0.0234869	0.023559	0.111131	0.224895	0.152898	0.187191	0.335632	0.357386		0.776	0.0901952	0.0465618	0.009516	0.0185764	0.0210427	0.0216082	0.0547815	0.0830042	0.0116189	0.0992598	0.0744974	0.0689734
0.777	0.016413	0.033989	0.0221435	0.00281207	0.0234367	0.0240528	0.112245	0.226608	0.155568	0.191005	0.34075	0.360531		0.777	0.0890257	0.0466946	0.00945217	0.0179877	0.0209923	0.0216944	0.0549744	0.0836817	0.0121105	0.100386	0.0746098	0.0708716
0.778	0.0170425	0.0338134	0.0225274	0.00280723	0.0233362	0.0246763	0.113443	0.227961	0.158152	0.194549	0.345954	0.363619		0.778	0.087746	0.0468459	0.00947863	0.0172827	0.0209057	0.0217347	0.0550259	0.0842519	0.0126233	0.101667	0.0747609	0.0730488
0.779	0.0175147	0.0336792	0.022826	0.0028735	0.0232057	0.0254382	0.114568	0.229199	0.160679	0.197918	0.351133	0.366529		0.779	0.0867332	0.0470077	0.00955454	0.0166732	0.0206929	0.0217057	0.0551773	0.0849709	0.0132249	0.103174	0.0751042	0.075355
0.78	0.0177712	0.0337058	0.022907	0.00303086	0.0231503	0.0263435	0.115612	0.230528	0.163185	0.201112	0.356309	0.369262		0.78	0.0859619	0.0471344	0.00960202	0.0161844	0.0204035	0.0215933	0.055463	0.0860923	0.0138786	0.104675	0.0756502	0.0776853
0.781	0.0176739	0.0338555	0.0227261	0.00328248	0.0231954	0.0273457	0.116687	0.232089	0.165773	0.204218	0.361585	0.371825		0.781	0.085238	0.047198	0.00958295	0.0157954	0.0201564	0.0213927	0.055628	0.0875429	0.0145376	0.106042	0.0762442	0.079963
0.782	0.0173061	0.0339081	0.022333	0.00360729	0.0232762	0.0283374	0.117818	0.233956	0.168569	0.207382	0.366956	0.374095		0.782	0.0844869	0.0472071	0.00955343	0.0155269	0.0200355	0.021118	0.0555873	0.0890534	0.0152291	0.107185	0.0768571	0.0820381
0.783	0.0167559	0.0334766	0.0218372	0.00401032	0.0233564	0.0292132	0.11894	0.236218	0.171675	0.210745	0.372276	0.37603		0.783	0.0840187	0.0472342	0.00954427	0.0154109	0.0200251	0.0208291	0.0554921	0.0907485	0.0159683	0.10818	0.0775011	0.0838906
0.784	0.0161058	0.0324733	0.0212911	0.00452264	0.0234533	0.0299039	0.119968	0.238877	0.175036	0.214424	0.377462	0.377824		0.784	0.083936	0.0472966	0.00951831	0.0154914	0.0200225	0.0205763	0.0553806	0.0929033	0.0167147	0.109228	0.078134	0.0856093
0.785	0.0155699	0.0312082	0.0207719	0.00511857	0.0234849	0.0304333	0.120895	0.241666	0.178571	0.218366	0.38257	0.379936		0.785	0.0841008	0.0472835	0.0094864	0.0157537	0.0199364	0.0203373	0.0551987	0.095341	0.0174869	0.11057	0.078703	0.0872847
0.786	0.0153539	0.029971	0.0203769	0.00568863	0.023318	0.0308592	0.121831	0.244152	0.182205	0.222419	0.387458	0.3824		0.786	0.0842936	0.0471161	0.00948301	0.0161305	0.0197355	0.0200518	0.0550162	0.0976377	0.0183554	0.112333	0.0792209	0.0888925
0.787	0.0155228	0.0289163	0.020128	0.00615215	0.0229527	0.0312516	0.12286	0.246151	0.185845	0.226453	0.391982	0.384752		0.787	0.0841894	0.0467849	0.00949243	0.0165808	0.0194311	0.0197063	0.0549745	0.099464	0.0193066	0.114429	0.0798165	0.0903173
0.788	0.0159768	0.0283333	0.019951	0.00651442	0.0225252	0.0316656	0.123938	0.247766	0.189342	0.230325	0.396212	0.386702		0.788	0.0834913	0.0463559	0.00947865	0.0171535	0.0190864	0.0193477	0.0550184	0.100772	0.0202402	0.116649	0.0806166	0.0916095
0.789	0.016651	0.0283004	0.0197965	0.00681895	0.0221811	0.0321118	0.124967	0.249066	0.192526	0.23399	0.40022	0.38823		0.789	0.0820037	0.0459047	0.00943049	0.017769	0.0187957	0.0190196	0.0549771	0.101742	0.0210925	0.118804	0.0815168	0.0929367
0.79	0.0174665	0.028518	0.0196609	0.00708767	0.0219721	0.0325967	0.125986	0.250169	0.195361	0.237502	0.403892	0.389401		0.79	0.0796726	0.0455026	0.00935486	0.0182828	0.0185833	0.018738	0.0547749	0.102619	0.0218802	0.120767	0.0824134	0.094356
0.791	0.0183128	0.0287942	0.0195531	0.00732556	0.02185	0.0330888	0.127062	0.251168	0.197947	0.240936	0.407177	0.390387		0.791	0.0767883	0.0451897	0.00926404	0.0186343	0.0183723	0.018421	0.0544399	0.103591	0.0227005	0.122507	0.0832864	0.0958988
0.792	0.0190429	0.0291462	0.0194825	0.00752847	0.0217791	0.0335069	0.128223	0.252042	0.200387	0.244378	0.410151	0.39143		0.792	0.0738034	0.0449348	0.00916328	0.0187999	0.0180879	0.0179695	0.0540871	0.104819	0.0235754	0.124038	0.084064	0.0976864
0.793	0.0195247	0.0295432	0.0194208	0.00768828	0.0217368	0.0338082	0.129499	0.252899	0.202763	0.247842	0.413011	0.392579		0.793	0.0709621	0.0446472	0.00906728	0.0187887	0.0176724	0.0173892	0.0538596	0.106303	0.0244675	0.125476	0.0847162	0.099701
0.794	0.0197061	0.0299072	0.0193714	0.00784637	0.0217044	0.0339904	0.130877	0.253813	0.205129	0.251348	0.415818	0.393657		0.794	0.0685995	0.0442836	0.00895948	0.0186414	0.0171768	0.0167744	0.053826	0.107844	0.0253191	0.12711	0.0853919	0.101843
0.795	0.0196147	0.0302456	0.0193964	0.00809151	0.0216871	0.0340853	0.132326	0.254776	0.20763	0.254928	0.418466	0.394696		0.795	0.0671898	0.0438745	0.00884126	0.0184497	0.0167549	0.0162098	0.0539527	0.109366	0.0261272	0.128996	0.086139	0.104024
0.796	0.0193509	0.0306283	0.0194927	0.00844595	0.0217339	0.034132	0.133747	0.255834	0.210423	0.258562	0.421058	0.395807		0.796	0.0668972	0.0434998	0.0087684	0.0183081	0.0165277	0.0157262	0.0541755	0.110914	0.0269603	0.130962	0.086991	0.106117
0.797	0.0189951	0.0310991	0.0196187	0.00884602	0.0218863	0.0341615	0.135034	0.256953	0.213578	0.262184	0.423877	0.396823		0.797	0.0674816	0.0431194	0.00879805	0.0182695	0.0165791	0.0153201	0.0543909	0.112507	0.0278646	0.132921	0.0879859	0.108011
0.798	0.0185617	0.0316256	0.0197172	0.00923958	0.0220653	0.0341903	0.136182	0.25787	0.21702	0.265749	0.426761	0.397394		0.798	0.0683745	0.0426884	0.00896513	0.0183535	0.0169374	0.0149883	0.0545665	0.114036	0.0288894	0.134868	0.0890545	0.10956
0.799	0.018204	0.0321058	0.0197573	0.00958589	0.0221376	0.0342006	0.137241	0.258612	0.220641	0.269263	0.429291	0.39734		0.799	0.0687814	0.0422792	0.00924799	0.0185469	0.0174404	0.0146992	0.0548	0.115626	0.0300064	0.136882	0.0902236	0.110785
0.8	0.0181182	0.0325267	0.0197433	0.00986947	0.0220728	0.0342022	0.138274	0.259291	0.224291	0.272644	0.431436	0.396652		0.8	0.0684324	0.0419542	0.0095794	0.0188511	0.0178447	0.014383	0.055164	0.117335	0.0310847	0.138929	0.0916762	0.111855
0.801	0.0183659	0.0328856	0.0197268	0.0100575	0.0219468	0.0342481	0.139359	0.260065	0.227655	0.275741	0.433445	0.395487		0.801	0.0673436	0.0416489	0.00988479	0.0193178	0.0180608	0.0140088	0.0556233	0.11928	0.0320919	0.140975	0.0934876	0.112973
0.802	0.018939	0.0330892	0.0197152	0.0101367	0.0218141	0.0343229	0.140525	0.260918	0.230445	0.278359	0.435605	0.39415		0.802	0.0652294	0.0413256	0.0100869	0.01987	0.0181146	0.0136159	0.0560938	0.121647	0.0330821	0.143018	0.095591	0.114284
0.803	0.0197158	0.0330846	0.0196998	0.0101571	0.0216843	0.0343731	0.14178	0.261649	0.232685	0.28034	0.437985	0.392779		0.803	0.0622983	0.0410666	0.0102269	0.0202515	0.0180356	0.0132435	0.0566269	0.124076	0.034049	0.145025	0.0978499	0.115797
0.804	0.0204607	0.0329525	0.0196627	0.0101554	0.0215659	0.034374	0.143155	0.262071	0.234695	0.281674	0.440305	0.391254		0.804	0.0592535	0.040913	0.0104206	0.0203036	0.0178643	0.0129299	0.0573595	0.125948	0.0349287	0.146913	0.100088	0.117493
0.805	0.0209946	0.0328291	0.01955	0.0101488	0.0214673	0.0343572	0.144618	0.262241	0.236699	0.282579	0.442433	0.389455		0.805	0.0567741	0.040818	0.0106717	0.0201889	0.017605	0.0126558	0.0582915	0.127323	0.0357266	0.148665	0.102247	0.119331
0.806	0.0212436	0.0327319	0.0192975	0.0101578	0.0214034	0.0343709	0.145966	0.262409	0.238774	0.283334	0.444517	0.387373		0.806	0.0554383	0.0407546	0.010889	0.0202388	0.0172749	0.0123926	0.0592224	0.128655	0.0365351	0.150419	0.104404	0.121115
0.807	0.021195	0.0326443	0.0188819	0.0102023	0.0213986	0.0344406	0.147035	0.262856	0.240828	0.284232	0.446616	0.385138		0.807	0.055176	0.0407123	0.0110413	0.0205877	0.0168845	0.0121274	0.0601495	0.130065	0.0374056	0.152219	0.106645	0.122643
0.808	0.0209867	0.0325875	0.0183253	0.0103127	0.0214931	0.0345705	0.1478	0.263604	0.242819	0.285539	0.448482	0.382844		0.808	0.0552886	0.0406931	0.0111391	0.0211131	0.0164306	0.0118531	0.0613669	0.131439	0.0383605	0.153945	0.10905	0.123829
0.809	0.0208046	0.0325481	0.0177213	0.0105097	0.0216997	0.0347377	0.148395	0.264436	0.244741	0.287277	0.450045	0.38043		0.809	0.0553078	0.040643	0.0111647	0.0215631	0.0160003	0.0116027	0.0628262	0.132967	0.0394379	0.155277	0.111732	0.124842
0.81	0.0207001	0.0325167	0.017257	0.0107292	0.0219707	0.0348736	0.14905	0.265132	0.246655	0.28934	0.451595	0.377887		0.81	0.0549493	0.0405517	0.0111469	0.0217422	0.0157367	0.0114293	0.064185	0.135022	0.0406194	0.156266	0.114676	0.125871
0.811	0.0206196	0.032464	0.0170463	0.0109103	0.0222519	0.0348875	0.149869	0.265542	0.248686	0.291602	0.453205	0.375262		0.811	0.0543091	0.0404635	0.011146	0.0216941	0.0156331	0.0113581	0.0653603	0.137456	0.0418298	0.157304	0.117733	0.126899
0.812	0.0205306	0.0323511	0.0171336	0.0110545	0.0225375	0.0347838	0.150855	0.265644	0.250816	0.293924	0.454771	0.372692		0.812	0.0536054	0.0403496	0.0111898	0.0215646	0.0155783	0.0113585	0.0664263	0.139798	0.0430331	0.158689	0.120914	0.127907
0.813	0.0203319	0.0321864	0.0175499	0.0111413	0.0228464	0.0346212	0.152033	0.265429	0.252904	0.296202	0.456179	0.370279		0.813	0.0529137	0.0401436	0.0112668	0.0213987	0.0155331	0.0113296	0.0674737	0.141711	0.0442162	0.160492	0.124285	0.12908
0.814	0.020044	0.0320355	0.0182556	0.0111275	0.0231684	0.0344761	0.153401	0.264808	0.254736	0.298322	0.457342	0.368024		0.814	0.0520613	0.0398615	0.0113703	0.0211408	0.0155138	0.0112025	0.0686669	0.14296	0.0454378	0.162571	0.127789	0.130523
0.815	0.019781	0.0319453	0.0191535	0.0110109	0.0234335	0.0344087	0.15491	0.263746	0.256261	0.300153	0.45826	0.365703		0.815	0.0511819	0.0396638	0.0115118	0.0208027	0.0154989	0.0109949	0.0699495	0.143427	0.0466593	0.164746	0.131366	0.132167
0.816	0.0196356	0.0318209	0.0201376	0.0108744	0.0236142	0.0344662	0.156471	0.262434	0.257563	0.301644	0.458906	0.363122		0.816	0.0507209	0.0396709	0.0117098	0.0204926	0.0154476	0.0107445	0.0709947	0.143184	0.0477486	0.166778	0.135118	0.133979
0.817	0.0196269	0.0316181	0.0210967	0.0108123	0.0237742	0.0347133	0.157959	0.261147	0.258667	0.302887	0.459322	0.360279		0.817	0.0509322	0.0398847	0.0119675	0.020272	0.0153671	0.010473	0.0719911	0.142737	0.0486364	0.16847	0.13931	0.135962
0.818	0.0197734	0.031445	0.0219911	0.0108345	0.0239402	0.0351862	0.159325	0.259942	0.259535	0.304031	0.459553	0.357193		0.818	0.0518554	0.0402765	0.0122571	0.0200273	0.015288	0.0101908	0.0729549	0.14282	0.0493726	0.169833	0.1439	0.138141
0.819	0.0201387	0.0313476	0.0228289	0.010932	0.0240839	0.035831	0.160563	0.258726	0.260179	0.305195	0.459579	0.353913		0.819	0.0532769	0.0407877	0.0125471	0.0196346	0.015273	0.00991803	0.0738883	0.143605	0.0500336	0.171066	0.148519	0.140418
0.82	0.0207155	0.0312413	0.0236171	0.0111241	0.0242282	0.0365478	0.161689	0.257599	0.260678	0.30639	0.459548	0.350422		0.82	0.0548128	0.0414161	0.0128266	0.0191783	0.0153529	0.00968558	0.074888	0.144753	0.0506692	0.172305	0.152988	0.142633
0.821	0.0215329	0.0310665	0.0243791	0.0114006	0.0244086	0.0372399	0.162695	0.256734	0.261041	0.307606	0.459685	0.346665		0.821	0.05604	0.0421046	0.0131128	0.0188623	0.0154731	0.00946441	0.0760106	0.146087	0.051295	0.173564	0.157256	0.144773
0.822	0.022505	0.0308404	0.025102	0.0117173	0.0246015	0.0378471	0.163623	0.256245	0.261218	0.30885	0.459887	0.342603		0.822	0.0566455	0.0427286	0.0134411	0.0188609	0.0155906	0.00923553	0.0771609	0.147726	0.0518745	0.174717	0.161308	0.146978
0.823	0.0234616	0.0305454	0.025732	0.012056	0.0247358	0.0383894	0.16454	0.256146	0.261219	0.310105	0.459978	0.338162		0.823	0.0565337	0.0432566	0.0138119	0.019189	0.0157034	0.00905416	0.0782234	0.149833	0.0524276	0.175768	0.165327	0.149434
0.824	0.024335	0.0302324	0.0262132	0.0124194	0.0247452	0.0388783	0.16548	0.256264	0.261087	0.311437	0.459988	0.333441		0.824	0.055928	0.0437214	0.0141748	0.0197067	0.0158194	0.00892731	0.0792895	0.15237	0.0530163	0.176859	0.169405	0.152123
0.825	0.0251116	0.0299657	0.0265362	0.0128208	0.0246406	0.0393165	0.166346	0.256438	0.260884	0.312838	0.460089	0.328803		0.825	0.0550694	0.0441296	0.0144984	0.0203096	0.0159404	0.0088226	0.0805467	0.154837	0.0537319	0.17813	0.173445	0.154884
0.826	0.0257836	0.0297078	0.0267237	0.0132467	0.0245078	0.0396686	0.167056	0.256559	0.260533	0.314266	0.460218	0.32435		0.826	0.0540401	0.0445006	0.0147583	0.0209162	0.0160372	0.00870267	0.08193	0.156678	0.0545596	0.179653	0.177482	0.15765
0.827	0.0263886	0.0294305	0.0268563	0.0136594	0.0244107	0.0398867	0.167677	0.256544	0.259825	0.315741	0.459997	0.319901		0.827	0.0529298	0.0448914	0.0149418	0.0214073	0.0160485	0.00851311	0.0831414	0.158121	0.0553814	0.181378	0.181599	0.160387
0.828	0.0270237	0.0291034	0.027009	0.0139883	0.024323	0.0399694	0.168328	0.2563	0.258736	0.317172	0.459042	0.315496		0.828	0.0518819	0.0453992	0.0150506	0.0217365	0.0158858	0.00826627	0.0841588	0.159828	0.056156	0.18318	0.185929	0.163016
0.829	0.0277618	0.0287667	0.0272499	0.0141706	0.024222	0.039968	0.169112	0.25571	0.257436	0.318328	0.457265	0.311299		0.829	0.0510444	0.0460129	0.0150921	0.0219608	0.0154841	0.00800723	0.0852137	0.161856	0.0569193	0.184949	0.190685	0.165582
0.83	0.0285795	0.0285438	0.0275826	0.014286	0.0241589	0.0399667	0.170053	0.254675	0.256007	0.319086	0.45493	0.307317		0.83	0.050431	0.0465826	0.0150694	0.022123	0.015015	0.00774105	0.0863962	0.163661	0.0577261	0.186685	0.195923	0.16818
0.831	0.0294444	0.0284867	0.0279577	0.0144873	0.0241645	0.0400207	0.171057	0.253374	0.254533	0.319485	0.452394	0.303443		0.831	0.0497437	0.0469856	0.0149347	0.0221847	0.0147655	0.00744264	0.0876724	0.165388	0.0586104	0.188494	0.201546	0.170925
0.832	0.0303781	0.0285683	0.0282535	0.014831	0.0241872	0.0401779	0.171941	0.251972	0.25314	0.319703	0.449819	0.299642		0.832	0.0487073	0.0472607	0.0146871	0.0220818	0.0147653	0.00710819	0.0890456	0.166808	0.0594766	0.190411	0.207204	0.173822
0.833	0.0313128	0.0287507	0.0284338	0.015241	0.0241692	0.0404804	0.172611	0.250651	0.251915	0.320029	0.4471	0.295661		0.833	0.0472686	0.0475033	0.0144615	0.0219029	0.0148905	0.00677278	0.0905113	0.167297	0.0602084	0.192395	0.212461	0.176716
0.834	0.0321125	0.0289973	0.0285808	0.015618	0.0240887	0.0409288	0.173108	0.249521	0.250873	0.320599	0.444067	0.291263		0.834	0.0455285	0.0477767	0.0143143	0.0218358	0.0150228	0.00646676	0.0919314	0.166894	0.0607622	0.194447	0.217304	0.179519
0.835	0.0327449	0.0292705	0.028753	0.0159168	0.0239566	0.0415197	0.173487	0.248642	0.249891	0.321439	0.440889	0.286697		0.835	0.04374	0.0481298	0.0141607	0.0218908	0.0151151	0.00616552	0.0931023	0.166406	0.0611697	0.196553	0.221886	0.182281
0.836	0.033241	0.0295776	0.028977	0.0161392	0.0237861	0.042217	0.17376	0.247918	0.248825	0.322549	0.437908	0.282284		0.836	0.0421542	0.0486137	0.013966	0.0219747	0.0152037	0.00584674	0.0939256	0.166323	0.0614999	0.198734	0.226242	0.185016
0.837	0.0336225	0.0299591	0.0292665	0.0163114	0.023573	0.0429469	0.17399	0.247167	0.247625	0.323867	0.435245	0.278045		0.837	0.0408961	0.0492689	0.013768	0.0220424	0.0152966	0.00553141	0.0944608	0.166656	0.0617671	0.201063	0.230422	0.187866
0.838	0.033868	0.0303735	0.0296401	0.0164561	0.0233296	0.0436373	0.174166	0.246344	0.246357	0.325243	0.432757	0.27388		0.838	0.0399653	0.0500346	0.0136144	0.0220545	0.015399	0.00525904	0.0947251	0.167329	0.0620264	0.203593	0.234419	0.191311
0.839	0.0340209	0.030731	0.0301304	0.0165541	0.0230569	0.0442322	0.174268	0.245513	0.245112	0.326555	0.430332	0.269694		0.839	0.0394522	0.0507646	0.0135514	0.0220909	0.0155178	0.00507523	0.094678	0.16825	0.0623512	0.206358	0.238177	0.195631
0.84	0.0341547	0.0309946	0.0307136	0.0165748	0.022735	0.0447037	0.174308	0.244644	0.243941	0.327671	0.4279	0.265569		0.84	0.0393515	0.051381	0.0135925	0.0223609	0.015607	0.00495042	0.0944942	0.169206	0.0627285	0.209299	0.241551	0.200531
0.841	0.0343322	0.0311863	0.0313219	0.016591	0.0223938	0.0451108	0.174258	0.24368	0.242804	0.328449	0.425289	0.261564		0.841	0.0395486	0.0519188	0.0137128	0.022915	0.0156365	0.00478726	0.0944542	0.16978	0.0632392	0.212293	0.244468	0.205633
0.842	0.0345958	0.0313536	0.0319327	0.0166778	0.0220655	0.0455469	0.174029	0.242588	0.241575	0.328908	0.422305	0.257553		0.842	0.0399098	0.052409	0.0138847	0.0236154	0.0156457	0.00453758	0.0945164	0.169729	0.0639398	0.21528	0.247035	0.210702
0.843	0.0349339	0.0315175	0.0324812	0.0168112	0.0217421	0.0460228	0.173686	0.241362	0.240153	0.32911	0.418713	0.253334		0.843	0.0402685	0.0528957	0.0140692	0.0242872	0.0156557	0.00422992	0.0947154	0.169145	0.0646998	0.218164	0.249283	0.215605
0.844	0.0354038	0.0316767	0.0328379	0.016961	0.0214233	0.04651	0.17334	0.240143	0.238464	0.329109	0.414563	0.248882		0.844	0.0405886	0.0534009	0.0142311	0.0248343	0.0156333	0.0039531	0.0951403	0.168261	0.0653919	0.220869	0.251208	0.22031
0.845	0.0361012	0.0318198	0.0329913	0.017161	0.0210764	0.0469776	0.173003	0.239152	0.236482	0.328919	0.410341	0.244372		0.845	0.0409415	0.0538721	0.0143615	0.025294	0.0155683	0.00375409	0.0956233	0.167347	0.065913	0.223414	0.253147	0.224823
0.846	0.0370022	0.0319265	0.033054	0.0174455	0.0206475	0.0474104	0.172627	0.23835	0.234217	0.328517	0.406407	0.239998		0.846	0.0412123	0.0542132	0.0144617	0.0256688	0.0155097	0.00362028	0.0961523	0.166568	0.0662779	0.225864	0.255303	0.229054
0.847	0.0379066	0.0320119	0.0331495	0.0177422	0.0201742	0.0478051	0.172184	0.237558	0.231711	0.327899	0.402957	0.235733		0.847	0.0412317	0.054395	0.0145074	0.0259449	0.0154847	0.00354714	0.0970542	0.166024	0.0666191	0.228292	0.257423	0.233139
0.848	0.038613	0.0320734	0.0333571	0.0179463	0.0197158	0.0481469	0.171631	0.236858	0.229108	0.327054	0.400046	0.231375		0.848	0.0409169	0.0544475	0.0144374	0.0262354	0.0154679	0.00351415	0.0980712	0.165641	0.06705	0.230813	0.259146	0.23714
0.849	0.0390088	0.0321086	0.0336804	0.0180678	0.0193369	0.0483716	0.170938	0.236419	0.22659	0.326007	0.397382	0.226891		0.849	0.0401114	0.0544423	0.014287	0.0266113	0.0154492	0.003509	0.0990508	0.165273	0.0675942	0.23347	0.260341	0.240944
0.85	0.0390823	0.0321538	0.0340696	0.018167	0.0190758	0.0484397	0.170206	0.2361	0.224296	0.324843	0.394578	0.222379		0.85	0.0388607	0.0544821	0.0141717	0.0269371	0.0154244	0.00353421	0.100055	0.164901	0.0682803	0.236209	0.26119	0.244599
0.851	0.038876	0.0322748	0.0345066	0.0182682	0.0188629	0.0483603	0.169562	0.235627	0.222224	0.323664	0.391401	0.217969		0.851	0.037447	0.054544	0.0141319	0.0270482	0.0153575	0.00355513	0.101072	0.164712	0.0691167	0.239078	0.261986	0.248181
0.852	0.0384296	0.0324979	0.0349763	0.0183351	0.0186131	0.0481428	0.169015	0.234875	0.220259	0.322481	0.387853	0.21367		0.852	0.0362043	0.054576	0.014135	0.0268259	0.0152168	0.00356997	0.102096	0.164688	0.0700533	0.242139	0.263168	0.25182
0.853	0.0378736	0.032787	0.0354095	0.0183185	0.0183263	0.047835	0.16849	0.233811	0.218252	0.321155	0.384077	0.209472		0.853	0.035207	0.0546412	0.0141439	0.0262108	0.0150266	0.00358429	0.103272	0.164399	0.0710718	0.245386	0.264979	0.255557
0.854	0.0373237	0.033089	0.035695	0.0182493	0.0180489	0.0474795	0.167927	0.232446	0.216082	0.31956	0.380086	0.205463		0.854	0.0344743	0.05478	0.0141529	0.0253081	0.0148573	0.0035468	0.104627	0.163646	0.0721754	0.248747	0.267224	0.259259
0.855	0.0367952	0.0333428	0.0358465	0.0182013	0.0178377	0.0470906	0.16735	0.230862	0.213698	0.317654	0.37575	0.2017		0.855	0.0340047	0.0549585	0.0141679	0.0243122	0.0147815	0.00341577	0.105945	0.162595	0.0733446	0.25211	0.26949	0.262859
0.856	0.036384	0.0335212	0.0359821	0.0181811	0.0176992	0.0466656	0.166863	0.229145	0.211166	0.315416	0.371003	0.198068		0.856	0.0336795	0.0551508	0.0141754	0.023368	0.0147796	0.00319896	0.106955	0.161515	0.0745036	0.255422	0.271385	0.266413
0.857	0.036189	0.0336541	0.036151	0.0181691	0.0175659	0.0462528	0.166486	0.227357	0.208636	0.312751	0.36597	0.194433		0.857	0.0334797	0.0553863	0.0141882	0.0225687	0.014773	0.00297967	0.107684	0.160673	0.0755845	0.2587	0.272736	0.270134
0.858	0.0361173	0.0337572	0.0363342	0.0181366	0.0173688	0.0459154	0.166059	0.225547	0.206254	0.309615	0.360958	0.190771		0.858	0.0333395	0.0556105	0.0142126	0.0219847	0.0147128	0.00283952	0.108434	0.159966	0.0765447	0.262047	0.273584	0.274299
0.859	0.036072	0.0338324	0.0364767	0.0180734	0.0171064	0.045673	0.165486	0.223724	0.204003	0.306238	0.356261	0.187082		0.859	0.0331098	0.0557348	0.0142173	0.0215976	0.0145864	0.00277469	0.109344	0.158976	0.0772892	0.265509	0.274023	0.279093
0.86	0.0360568	0.033884	0.036553	0.0180589	0.016865	0.0454863	0.164766	0.22196	0.20171	0.302966	0.352161	0.183403		0.86	0.0326516	0.0557693	0.0141721	0.0212792	0.0144323	0.00274601	0.110322	0.157798	0.0777395	0.269015	0.27421	0.284349
0.861	0.0360442	0.0339091	0.0365791	0.0181269	0.0166858	0.0452768	0.163871	0.220417	0.199264	0.299933	0.348626	0.17972		0.861	0.0318719	0.0557809	0.0140606	0.0209084	0.0142232	0.00275174	0.111299	0.157003	0.0779705	0.272462	0.274167	0.289567
0.862	0.0359346	0.033923	0.0365726	0.018196	0.0165078	0.0449598	0.16277	0.21896	0.196609	0.297124	0.345208	0.17598		0.862	0.0309744	0.055844	0.0139285	0.0204594	0.013858	0.00282826	0.112336	0.156502	0.0780955	0.275797	0.273661	0.294307
0.863	0.03568	0.0339818	0.0365775	0.018239	0.0163081	0.044475	0.161609	0.217497	0.193752	0.294425	0.34161	0.172036		0.863	0.0303237	0.0559253	0.01385	0.0199452	0.013297	0.0029988	0.11347	0.156509	0.0782404	0.279098	0.27281	0.298409
0.864	0.0352535	0.034152	0.0365739	0.0182929	0.0161091	0.0438327	0.160598	0.215937	0.190694	0.291659	0.33786	0.168014		0.864	0.0301729	0.0559772	0.013833	0.0193875	0.0126008	0.00321725	0.11463	0.157333	0.0785349	0.282419	0.272087	0.302034
0.865	0.0346408	0.0344146	0.0364653	0.0183574	0.015937	0.0430849	0.159709	0.21422	0.187427	0.28879	0.334141	0.164333		0.865	0.0304193	0.0559651	0.0138443	0.0187795	0.0119327	0.00341728	0.115786	0.158935	0.0791118	0.285696	0.271795	0.305395
0.866	0.0339375	0.0347358	0.0361815	0.0184764	0.0157914	0.0422888	0.158771	0.212438	0.184036	0.285869	0.330407	0.161119		0.866	0.0306709	0.0558407	0.0138478	0.0181032	0.0114182	0.00357162	0.11704	0.160903	0.0799609	0.288896	0.272143	0.30857
0.867	0.0333152	0.0350715	0.0357173	0.0186901	0.0156246	0.0414635	0.15778	0.210763	0.1807	0.282883	0.326458	0.158156		0.867	0.0305437	0.0555853	0.0138171	0.0174082	0.0111011	0.00368996	0.118416	0.162771	0.0809284	0.29208	0.273103	0.311623
0.868	0.0328583	0.0353557	0.0350975	0.0189643	0.0154009	0.0405958	0.15689	0.209243	0.177516	0.279717	0.322347	0.155299		0.868	0.0299168	0.0551901	0.0137481	0.0167606	0.0109477	0.00377803	0.119821	0.164186	0.081944	0.295299	0.274376	0.314594
0.869	0.0325351	0.03555	0.0343712	0.0192487	0.0151385	0.0396782	0.156186	0.207765	0.174441	0.276283	0.318332	0.152532		0.869	0.0289183	0.0546893	0.0136035	0.0162101	0.0108519	0.00383588	0.121401	0.165067	0.0829718	0.298546	0.275906	0.317302
0.87	0.0322081	0.0356622	0.0336427	0.0195184	0.0148788	0.0387285	0.155642	0.206182	0.171291	0.272552	0.314563	0.149764		0.87	0.0277813	0.0541807	0.0133621	0.015786	0.0107401	0.00384792	0.122992	0.165511	0.083973	0.301809	0.277848	0.319618
0.871	0.0318526	0.0357178	0.0330868	0.0197709	0.014663	0.0377695	0.155117	0.204457	0.167972	0.268623	0.311093	0.146816		0.871	0.0268283	0.0537697	0.0130524	0.0154168	0.010606	0.00382767	0.124413	0.1654	0.0848732	0.305169	0.280301	0.321647
0.872	0.0316521	0.0357193	0.0326892	0.0200054	0.0144755	0.0367947	0.154554	0.202694	0.164477	0.264612	0.307781	0.143665		0.872	0.0260984	0.0534753	0.0127041	0.0150277	0.0104185	0.00382429	0.125681	0.164766	0.0855614	0.308684	0.283043	0.323509
0.873	0.031814	0.0356974	0.0322648	0.0202121	0.0142303	0.0358203	0.154085	0.20101	0.160804	0.260531	0.304356	0.140472		0.873	0.025365	0.0533053	0.0123391	0.0146278	0.0101635	0.00384537	0.126915	0.164054	0.0860925	0.312293	0.285796	0.325198
0.874	0.0322939	0.0357334	0.031749	0.0204136	0.0139204	0.0348865	0.153635	0.199447	0.156998	0.256349	0.300875	0.137371		0.874	0.0244439	0.0532433	0.0119751	0.0142964	0.00987099	0.00386981	0.128125	0.163683	0.08666	0.315939	0.288491	0.326683
0.875	0.0327937	0.0358667	0.0312	0.0206342	0.0136038	0.0340136	0.152983	0.197953	0.153188	0.251984	0.29743	0.134338		0.875	0.0233081	0.0532616	0.0116295	0.0140511	0.00957903	0.00386425	0.129263	0.163692	0.0873992	0.319622	0.291027	0.327997
0.876	0.0330225	0.0360937	0.0306651	0.0208295	0.0133191	0.0332375	0.152079	0.196396	0.149501	0.247452	0.293734	0.131262		0.876	0.0222377	0.0533028	0.0112891	0.0137934	0.00930023	0.00382437	0.130356	0.164028	0.0883352	0.32331	0.293153	0.329305
0.877	0.0328828	0.0363697	0.030187	0.0209477	0.0131178	0.0325242	0.151039	0.194743	0.145939	0.24288	0.289566	0.128185		0.877	0.0215182	0.0533532	0.0109802	0.0134604	0.00902861	0.00376395	0.131445	0.164728	0.08948	0.326978	0.294809	0.330789
0.878	0.032504	0.0366018	0.0298379	0.0210362	0.0129582	0.0317868	0.149999	0.193101	0.142375	0.238378	0.284824	0.125306		0.878	0.0212648	0.0535387	0.0107675	0.0130734	0.00873258	0.00366824	0.132524	0.16579	0.0908093	0.330702	0.296074	0.332323
0.879	0.0320735	0.0367704	0.0296022	0.0212116	0.0127476	0.0309866	0.149111	0.191444	0.138816	0.233992	0.279626	0.122704		0.879	0.0213746	0.0539023	0.010721	0.0126049	0.00842719	0.00355683	0.133665	0.167049	0.0922462	0.3345	0.296921	0.333867
0.88	0.0317187	0.0368752	0.0293955	0.0214939	0.0124115	0.0301493	0.148361	0.189627	0.135296	0.22972	0.274348	0.120234		0.88	0.0216815	0.0542752	0.0108481	0.0120631	0.00815891	0.00346415	0.134925	0.168024	0.0936969	0.338262	0.297582	0.335526
0.881	0.0314365	0.0368965	0.0291952	0.0218075	0.0119366	0.0293255	0.14756	0.187682	0.131711	0.225569	0.2692	0.117821		0.881	0.0221059	0.054472	0.0110626	0.011567	0.00790591	0.00338504	0.136196	0.168325	0.0951298	0.341927	0.298423	0.337281
0.882	0.0311846	0.0368831	0.0289642	0.0220815	0.0113975	0.0285669	0.146622	0.185792	0.128037	0.221503	0.264135	0.115504		0.882	0.0225409	0.0544199	0.0112654	0.0111906	0.00767518	0.00333653	0.137464	0.168082	0.0966125	0.345465	0.299562	0.339127
0.883	0.0310036	0.0368728	0.028665	0.0223378	0.0108732	0.0279232	0.145665	0.184053	0.124369	0.217413	0.259052	0.113324		0.883	0.0228184	0.0542019	0.011399	0.010925	0.00751348	0.00335785	0.138781	0.167802	0.0982466	0.348918	0.300758	0.340779
0.884	0.0309961	0.0368781	0.0283776	0.0226702	0.0104086	0.027403	0.144747	0.182401	0.120793	0.213266	0.254004	0.111221		0.884	0.0231108	0.0539132	0.0114102	0.0107201	0.00738499	0.00347081	0.140062	0.167868	0.100044	0.352497	0.301705	0.341792
0.885	0.0313606	0.0369386	0.0282973	0.0230725	0.0100307	0.0269668	0.143795	0.180769	0.117386	0.209083	0.249216	0.109164		0.885	0.0236722	0.0535943	0.011289	0.010546	0.00725244	0.00367088	0.141226	0.168144	0.101929	0.356369	0.302256	0.341992
0.886	0.0322447	0.0370514	0.0284033	0.0234351	0.00973359	0.0265861	0.14274	0.179128	0.114168	0.204855	0.244742	0.107129		0.886	0.024476	0.0532749	0.011081	0.010427	0.0071362	0.00395783	0.142339	0.168246	0.103862	0.360515	0.302518	0.341608
0.887	0.0335484	0.0372098	0.0284884	0.0236974	0.00948149	0.0262404	0.141618	0.177386	0.111035	0.200658	0.240298	0.104992		0.887	0.0253125	0.0530056	0.0108696	0.0103638	0.0070711	0.00429736	0.143539	0.168261	0.105865	0.364733	0.302691	0.341009
0.888	0.0349763	0.0374188	0.0283555	0.02386	0.00921334	0.0258876	0.1405	0.17553	0.107811	0.196608	0.235686	0.102681		0.888	0.0259671	0.0528102	0.0107246	0.0103259	0.00710402	0.00460769	0.144901	0.168672	0.107985	0.368862	0.302883	0.340245
0.889	0.0362955	0.0376659	0.0280004	0.0239441	0.00890913	0.0254988	0.139449	0.173654	0.10444	0.192698	0.230807	0.100231		0.889	0.0263495	0.052708	0.0106766	0.0103089	0.0072334	0.00484274	0.146381	0.169665	0.110259	0.372781	0.303125	0.339085
0.89	0.0373745	0.0379534	0.0276048	0.0239914	0.00860946	0.0250699	0.138393	0.171783	0.100976	0.188804	0.2256	0.097747		0.89	0.0265997	0.0527128	0.0107108	0.0103342	0.00739708	0.00499207	0.147903	0.170984	0.11271	0.376544	0.303398	0.337338
0.891	0.0381916	0.0383156	0.0272642	0.024024	0.00828983	0.0246136	0.137175	0.169865	0.0975008	0.184816	0.220087	0.0953727		0.891	0.0270184	0.052738	0.0107659	0.0104492	0.00751905	0.00507284	0.149457	0.172184	0.11528	0.380322	0.303607	0.335081
0.892	0.0387969	0.0387597	0.0269614	0.0240347	0.00788628	0.0241662	0.135798	0.16797	0.0940725	0.180704	0.214369	0.0932199		0.892	0.0279664	0.0527197	0.0108355	0.0106604	0.00754012	0.00515307	0.151088	0.173168	0.117832	0.384197	0.303694	0.332693
0.893	0.0392057	0.0391991	0.0266041	0.0240065	0.00743312	0.0238139	0.134411	0.166358	0.0907225	0.176534	0.20864	0.0913083		0.893	0.0293877	0.052625	0.0109626	0.01089	0.00746426	0.00529162	0.152777	0.174081	0.120287	0.388158	0.303699	0.330509
0.894	0.0393891	0.0395481	0.0261957	0.0239431	0.00699738	0.0235933	0.133083	0.164901	0.0874855	0.172425	0.202999	0.0896153		0.894	0.0308481	0.0524579	0.0111226	0.0111205	0.00738033	0.0054766	0.154385	0.175236	0.122632	0.392067	0.303637	0.328505
0.895	0.0394467	0.0398071	0.0258472	0.0238743	0.00661214	0.0234639	0.131778	0.163505	0.0843714	0.168423	0.197331	0.0880264		0.895	0.0319043	0.0522473	0.0112454	0.0113759	0.00739903	0.00567074	0.155767	0.176618	0.124838	0.395767	0.303437	0.326623
0.896	0.0396091	0.0399844	0.025621	0.0238339	0.00628215	0.0233741	0.130573	0.16221	0.0813579	0.16446	0.191587	0.086348		0.896	0.0323469	0.0520377	0.0113036	0.0116784	0.00754558	0.00585979	0.157066	0.177737	0.126888	0.399204	0.302984	0.324936
0.897	0.0399023	0.0400409	0.0255073	0.0237957	0.00598894	0.0232615	0.129612	0.160953	0.0783654	0.160385	0.185876	0.0845216		0.897	0.0324164	0.0518898	0.0113238	0.0121085	0.00773318	0.00604362	0.158395	0.178375	0.128919	0.402468	0.302108	0.323454
0.898	0.0402241	0.0399778	0.0254852	0.0237371	0.00570826	0.0231097	0.128903	0.159545	0.0752823	0.156136	0.180184	0.0826075		0.898	0.0325503	0.0518504	0.0113427	0.0126536	0.00788042	0.0062126	0.159824	0.178758	0.131076	0.405686	0.300643	0.322051
0.899	0.0405769	0.0398509	0.0255443	0.0236858	0.00541564	0.0229364	0.128272	0.15803	0.0720928	0.151815	0.174413	0.080659		0.899	0.0329595	0.051866	0.0114177	0.0131829	0.00799547	0.00634622	0.161385	0.179004	0.133351	0.408875	0.298553	0.320485
0.9	0.041064	0.039719	0.0256284	0.0236505	0.00507113	0.0227422	0.127587	0.156639	0.0688431	0.147559	0.168551	0.078734		0.9	0.0335512	0.0519151	0.0116169	0.0136318	0.00810809	0.00644122	0.162844	0.179088	0.135655	0.411966	0.295904	0.318483
0.901	0.0418114	0.0396126	0.0256347	0.0236217	0.00467667	0.022472	0.126794	0.155484	0.0656455	0.143446	0.162611	0.0768646		0.901	0.0341216	0.0520192	0.0119005	0.0139849	0.00820781	0.00649365	0.164255	0.179204	0.137828	0.414907	0.292758	0.315981
0.902	0.0427961	0.0395753	0.0254381	0.0236111	0.00424876	0.0220762	0.12594	0.154586	0.062551	0.139511	0.156594	0.0750484		0.902	0.0344334	0.05219	0.0121664	0.0142415	0.00830995	0.0065037	0.165681	0.179773	0.139796	0.417648	0.289036	0.313068
0.903	0.0438365	0.0396646	0.0251161	0.0236335	0.00380374	0.0215629	0.125029	0.153958	0.0595495	0.135748	0.150651	0.0732563		0.903	0.0346487	0.0523773	0.0123423	0.0144197	0.00846914	0.00650907	0.166949	0.180827	0.14157	0.420197	0.284735	0.309738
0.904	0.0448089	0.0398663	0.0248931	0.0236562	0.00337647	0.0209544	0.12399	0.153573	0.0566377	0.132099	0.145016	0.0714929		0.904	0.0350099	0.0525142	0.0123935	0.0145238	0.00866805	0.00656659	0.167988	0.182106	0.143124	0.422613	0.280006	0.30611
0.905	0.0457528	0.0400586	0.0248851	0.0235995	0.00296532	0.0202859	0.122852	0.15329	0.0538299	0.128522	0.139727	0.0697801		0.905	0.0354966	0.052601	0.0123608	0.0145437	0.00885666	0.00670875	0.168913	0.183374	0.144431	0.424941	0.275017	0.302342
0.906	0.0467529	0.0401209	0.0251191	0.0234165	0.00253563	0.0195877	0.121715	0.152913	0.051106	0.125045	0.134719	0.0681426		0.906	0.0361639	0.0526427	0.012329	0.0145658	0.00901585	0.00694374	0.169875	0.184548	0.145451	0.427145	0.269985	0.298373
0.907	0.0478769	0.0400391	0.025545	0.0231831	0.00203972	0.0188672	0.120667	0.152435	0.0484659	0.121694	0.129948	0.0665798		0.907	0.0368907	0.0526885	0.0123516	0.0146619	0.00915958	0.00720489	0.170947	0.185674	0.146194	0.429103	0.264946	0.294092
0.908	0.0491347	0.0398931	0.0260878	0.0229705	0.00147027	0.0181752	0.119801	0.152053	0.0459291	0.118453	0.125339	0.0650151		0.908	0.0373238	0.052739	0.0123983	0.0147968	0.00933144	0.00741107	0.172072	0.186849	0.14672	0.430783	0.25986	0.289572
0.909	0.0504418	0.0398122	0.0266074	0.0227669	0.000947363	0.0175642	0.119058	0.151906	0.043563	0.115327	0.12085	0.0633465		0.909	0.0371274	0.052701	0.0123649	0.0148889	0.00958475	0.00757397	0.173161	0.188246	0.147067	0.432207	0.254894	0.28493
0.91	0.0516298	0.0398555	0.0270916	0.0225102	0.000587794	0.0170158	0.118238	0.152064	0.0413144	0.112339	0.116421	0.0616352		0.91	0.0363974	0.0525389	0.0122065	0.0149161	0.00987494	0.00771975	0.174207	0.190051	0.147265	0.433437	0.250327	0.280155
0.911	0.0526654	0.0400064	0.0275914	0.0221399	0.000378211	0.0164771	0.117303	0.152497	0.0390771	0.109479	0.111963	0.0600679		0.911	0.0355228	0.0523112	0.0119104	0.0149685	0.0101181	0.00783492	0.175251	0.192268	0.14733	0.434561	0.246013	0.275178
0.912	0.053715	0.0402565	0.0280653	0.0216791	0.000238321	0.0159027	0.116399	0.15307	0.0368662	0.106672	0.107536	0.058689		0.912	0.034655	0.0521451	0.0115077	0.0151452	0.0102911	0.00790078	0.17634	0.194709	0.147261	0.435501	0.241541	0.269946
0.913	0.0548258	0.0405622	0.0284985	0.0212103	9.19955e-05	0.0152543	0.115586	0.15362	0.0346737	0.103872	0.103232	0.0574341		0.913	0.0339228	0.0521159	0.011088	0.0154561	0.0103916	0.00788384	0.177516	0.197133	0.147062	0.436108	0.236581	0.264366
0.914	0.0558535	0.0408668	0.028914	0.0207879	0	0.0145229	0.114749	0.153999	0.0324876	0.101128	0.0991072	0.0562473		0.914	0.0335764	0.0521414	0.0106977	0.0158966	0.0104002	0.00772146	0.178749	0.199383	0.146685	0.436347	0.231036	0.258606
0.915	0.0567324	0.0411778	0.0293009	0.0204063	0	0.0137532	0.113795	0.154211	0.030329	0.0984933	0.0952194	0.0551065		0.915	0.0335642	0.0521502	0.0103595	0.0164652	0.0103552	0.00738386	0.179959	0.201465	0.146087	0.436107	0.225117	0.253119
0.916	0.0574422	0.0415127	0.0295718	0.0200179	0	0.0130208	0.112779	0.154401	0.0282175	0.095969	0.0914678	0.0540224		0.916	0.0337475	0.0521248	0.0100834	0.017126	0.0102932	0.00693535	0.181156	0.203507	0.145221	0.435259	0.219076	0.248318
0.917	0.0578944	0.0418624	0.0297718	0.0196297	0	0.0123361	0.111784	0.15465	0.0261872	0.0935337	0.0876936	0.0529937		0.917	0.0341342	0.0520216	0.00987052	0.0178272	0.0101835	0.00644163	0.182435	0.205615	0.144052	0.433857	0.212997	0.244238
0.918	0.0579955	0.0422038	0.030051	0.01927	0	0.0116583	0.110816	0.154963	0.024287	0.0911759	0.0839526	0.0520382		0.918	0.0347706	0.0517843	0.00969612	0.0185272	0.0100024	0.00592075	0.1838	0.207702	0.142613	0.432164	0.206924	0.240453
0.919	0.0577977	0.0425345	0.0306038	0.0189321	0	0.0109787	0.109857	0.155368	0.0225917	0.0888885	0.0803943	0.0511797		0.919	0.0355613	0.0514283	0.00950914	0.0191839	0.00974969	0.00538271	0.185048	0.209597	0.14096	0.430401	0.200924	0.236588
0.92	0.0575259	0.0428634	0.0314268	0.0185951	0	0.010321	0.108906	0.155928	0.0211043	0.0866767	0.0771475	0.0503803		0.92	0.0364535	0.051036	0.00926856	0.0197302	0.00944365	0.00483554	0.185981	0.21125	0.13914	0.428544	0.195023	0.232657
0.921	0.0573968	0.0431735	0.0323457	0.0182818	0	0.00967808	0.108066	0.156697	0.0197555	0.0845218	0.0742165	0.0496049		0.921	0.0374396	0.0506582	0.00899301	0.020135	0.00910505	0.00431061	0.186731	0.212816	0.13719	0.426375	0.189057	0.228792
0.922	0.0574715	0.0434064	0.0332076	0.0180329	0	0.00900548	0.10738	0.157718	0.0185083	0.0824329	0.0714863	0.0488692		0.922	0.0384121	0.0503246	0.00874471	0.0204101	0.00874535	0.00382071	0.187386	0.214616	0.135168	0.423857	0.182744	0.22505
0.923	0.0576458	0.0435473	0.0339459	0.0178363	0	0.00828273	0.106795	0.158898	0.0173467	0.0804775	0.068783	0.0481744		0.923	0.0391767	0.0500349	0.00852859	0.0206349	0.00847136	0.00329119	0.187948	0.216703	0.133183	0.421069	0.17599	0.221463
0.924	0.0578551	0.0436655	0.0345832	0.017679	0	0.00748946	0.106262	0.160006	0.0162619	0.0786724	0.0660122	0.0474754		0.924	0.0395745	0.0498041	0.00827935	0.0208984	0.00832079	0.00263988	0.188443	0.218847	0.131318	0.418031	0.168996	0.217984
0.925	0.0581329	0.0437549	0.0351331	0.0175847	0	0.00661769	0.105729	0.161184	0.0152675	0.0769555	0.0632217	0.0467715		0.925	0.0396364	0.0496964	0.00797996	0.0211486	0.00820733	0.00188697	0.188965	0.220648	0.129545	0.41481	0.161963	0.214659
0.926	0.0585008	0.0437305	0.0355935	0.0175479	0	0.00569665	0.105142	0.1625	0.0143992	0.0752722	0.0605155	0.0460751		0.926	0.039572	0.049746	0.0076887	0.021297	0.00809956	0.00108619	0.189633	0.22209	0.127725	0.411559	0.154982	0.211423
0.927	0.0589521	0.0436471	0.0360039	0.0175301	0	0.0047547	0.104423	0.163893	0.0136676	0.0735976	0.0579068	0.0454312		0.927	0.0396641	0.0498999	0.00745142	0.0213737	0.00805416	0.000270805	0.190343	0.223654	0.125756	0.408365	0.148035	0.208082
0.928	0.059518	0.0436566	0.0364429	0.0175013	0	0.00383331	0.103528	0.165279	0.0130586	0.0719361	0.0553809	0.0449109		0.928	0.040028	0.0500736	0.00726465	0.0213978	0.00807117	-0.00056099	0.191014	0.225554	0.123574	0.405119	0.141145	0.204514
0.929	0.0601542	0.0438068	0.0369379	0.0174323	0	0.00294897	0.10244	0.166658	0.0125386	0.0702809	0.0529696	0.0445053		0.929	0.0405636	0.0501682	0.00713384	0.0213764	0.00804596	-0.00142043	0.191621	0.227593	0.121166	0.401515	0.134511	0.200799
0.93	0.0606967	0.0440641	0.0374937	0.0173322	0	0.00209968	0.101264	0.16803	0.0120448	0.0686336	0.0507214	0.0441513		0.93	0.0413244	0.0501402	0.00703952	0.0213755	0.0078744	-0.00229142	0.19213	0.229744	0.118578	0.397523	0.128326	0.197111
0.931	0.0610932	0.044396	0.0381051	0.0172887	0	0.0013112	0.100229	0.169323	0.0115246	0.0670096	0.0486354	0.0438108		0.931	0.0423487	0.0500163	0.00690564	0.0214121	0.00754199	-0.00316875	0.192487	0.232137	0.11587	0.393376	0.122592	0.193524
0.932	0.0614032	0.0447672	0.0387505	0.0173475	0	0.000631491	0.0994834	0.170537	0.0109813	0.0654231	0.0466472	0.0435233		0.932	0.0434564	0.0498345	0.00670204	0.0214637	0.00718379	-0.00404485	0.192696	0.234711	0.113121	0.389194	0.11716	0.190034
0.933	0.0616268	0.0451065	0.0393791	0.0174452	0	8.33727e-05	0.0989744	0.171709	0.0104569	0.0638676	0.0446754	0.0433139		0.933	0.0445312	0.049563	0.00646033	0.021574	0.00692594	-0.00490386	0.192824	0.237145	0.110367	0.385	0.111999	0.186694
0.934	0.0617019	0.0453631	0.0399258	0.0174816	0	0	0.098616	0.172768	0.00997812	0.0623694	0.0427566	0.0431142		0.934	0.0453848	0.0492073	0.00623585	0.0217982	0.00675764	-0.00576879	0.193085	0.239215	0.107671	0.380773	0.107186	0.183625
0.935	0.0614811	0.0455586	0.0402644	0.0174084	0	0	0.0983607	0.173678	0.00954045	0.0609625	0.0410733	0.0428382		0.935	0.0459684	0.0488518	0.00608653	0.0221341	0.00669187	-0.00666823	0.193707	0.240887	0.10513	0.37643	0.102753	0.180847
0.936	0.0610584	0.0457642	0.0402747	0.0172721	0	0	0.0981566	0.174595	0.00911757	0.0596817	0.0396435	0.0424349		0.936	0.0464054	0.0485417	0.00600354	0.0225452	0.00675405	-0.00760572	0.19468	0.242272	0.102791	0.372016	0.0987076	0.178293
0.937	0.0608577	0.0460873	0.0399949	0.0171629	0	0	0.0980025	0.17574	0.00868874	0.0585188	0.0382943	0.041945		0.937	0.0466393	0.0482909	0.00591631	0.0229517	0.00687437	-0.00857876	0.195853	0.243543	0.100659	0.367598	0.0950171	0.175927
0.938	0.0610104	0.046592	0.0395564	0.0170584	0	0	0.0978766	0.1772	0.00824874	0.0574136	0.0369596	0.0414893		0.938	0.0467667	0.0480583	0.00578216	0.0233682	0.00698703	-0.0095672	0.197089	0.24476	0.0986591	0.363227	0.0915988	0.17365
0.939	0.0613295	0.04726	0.039109	0.0168746	0	0	0.0976981	0.178866	0.00780786	0.0563192	0.0356959	0.0411836		0.939	0.047133	0.0477822	0.00560133	0.0238933	0.00702186	-0.010535	0.198333	0.245881	0.0966303	0.358858	0.0883318	0.171366
0.94	0.0616889	0.0479895	0.0387168	0.0165948	0	0	0.0974533	0.180587	0.00736557	0.0551873	0.0345669	0.0409583		0.94	0.0478926	0.0474545	0.0054482	0.0245566	0.00695731	-0.0115116	0.199566	0.246797	0.0944814	0.354362	0.0851244	0.169063
0.941	0.0620703	0.0486741	0.0383449	0.016288	0	0	0.0971743	0.182268	0.00689582	0.0539883	0.0336169	0.0406316		0.941	0.0489373	0.0471521	0.00535986	0.0253561	0.0068508	-0.0125523	0.200667	0.247393	0.0922242	0.349715	0.081905	0.166781
0.942	0.0625008	0.0492901	0.0379686	0.0160763	0	0	0.0968925	0.183945	0.00637846	0.0527536	0.0328521	0.0401344		0.942	0.0501228	0.0469311	0.00530773	0.026288	0.00672842	-0.013655	0.201633	0.24787	0.0899166	0.344878	0.0787346	0.164567
0.943	0.0628979	0.049824	0.0376354	0.0159882	0	0	0.0966638	0.185729	0.00582643	0.0515642	0.0322518	0.0395282		0.943	0.0514183	0.0467597	0.00524525	0.0272732	0.00659604	-0.0147827	0.202585	0.248588	0.0876224	0.339944	0.0758051	0.162327
0.944	0.0633442	0.0502727	0.0374035	0.0159682	0	0	0.0964777	0.18764	0.00528583	0.0504644	0.031823	0.0388817		0.944	0.0527718	0.0466422	0.00513759	0.0282331	0.00649449	-0.0159028	0.203558	0.249536	0.0854112	0.335045	0.073352	0.160038
0.945	0.0639384	0.0506983	0.0372837	0.0159676	0	0	0.0963317	0.189607	0.0047757	0.0494641	0.0315097	0.038291		0.945	0.0540784	0.0466067	0.00500803	0.0291413	0.00651535	-0.0169727	0.20447	0.250425	0.0832765	0.330242	0.0715161	0.157751
0.946	0.0646282	0.0511406	0.0372597	0.0159492	0	0	0.0963352	0.191489	0.00428806	0.0485812	0.0312066	0.0378427		0.946	0.0553639	0.046653	0.00491047	0.0299514	0.00670572	-0.0179497	0.205402	0.251162	0.0811368	0.325677	0.0702958	0.155477
0.947	0.0653349	0.0515816	0.0373149	0.01594	0	0	0.0965625	0.193191	0.0038152	0.047817	0.0309209	0.0375383		0.947	0.0565897	0.0467722	0.00486286	0.0306396	0.00699209	-0.0188261	0.20658	0.251757	0.0790046	0.321434	0.0696335	0.153103
0.948	0.0660614	0.0520215	0.0373878	0.0159762	0	0	0.0968971	0.194802	0.00337658	0.0471467	0.0307261	0.037266		0.948	0.0576649	0.0469482	0.00485082	0.0312291	0.00728174	-0.0196345	0.207942	0.252209	0.0769105	0.317453	0.0695656	0.150466
0.949	0.0668717	0.0524676	0.0374255	0.0160654	0	0	0.0972749	0.196517	0.00300873	0.0465636	0.0306451	0.0368865		0.949	0.0586826	0.0471894	0.00486597	0.0317761	0.00753576	-0.0204193	0.209535	0.252464	0.0748396	0.313535	0.0702393	0.147562
0.95	0.0678421	0.05293	0.0374124	0.0162296	0	0	0.0977226	0.198464	0.00271435	0.0460584	0.0306489	0.0364977		0.95	0.0596762	0.0475449	0.00491007	0.0323831	0.0077526	-0.0212249	0.211557	0.252481	0.0727621	0.309535	0.0717101	0.144563
0.951	0.0689691	0.0534479	0.0374393	0.0164886	0	0	0.098281	0.200539	0.00246375	0.0456033	0.0306968	0.0363095		0.951	0.0604521	0.0479939	0.00499867	0.0331528	0.00796478	-0.0220436	0.213997	0.25229	0.0706827	0.305587	0.0738455	0.141563
0.952	0.0701901	0.0540487	0.0375277	0.0167938	0	0	0.098888	0.20261	0.00226964	0.0452469	0.0307616	0.0363016		0.952	0.0609518	0.0484774	0.00515072	0.0340559	0.0082466	-0.0228401	0.216515	0.251998	0.0685807	0.301911	0.0765298	0.138549
0.953	0.0714822	0.0547227	0.0376467	0.0170531	0	0	0.0995681	0.204667	0.00215889	0.0450916	0.0308126	0.0362522		0.953	0.0612512	0.0489883	0.00539709	0.0349706	0.00864588	-0.0236072	0.218928	0.251629	0.0663828	0.298534	0.0797325	0.135471
0.954	0.0728445	0.0554144	0.0378015	0.0172413	0	0	0.10041	0.206731	0.00214149	0.0452141	0.0308491	0.0360801		0.954	0.061373	0.0495449	0.00576161	0.0357912	0.00911123	-0.0243129	0.221164	0.251069	0.0640376	0.295362	0.0833985	0.132274
0.955	0.0741929	0.056065	0.0380348	0.0173979	0	0	0.101417	0.20878	0.00218679	0.045556	0.0309025	0.0358759		0.955	0.0614169	0.050179	0.00620885	0.0364431	0.00959393	-0.0249213	0.223251	0.250413	0.0615479	0.29228	0.087372	0.128936
0.956	0.0754322	0.0567051	0.0383819	0.0175203	0	0	0.102524	0.210757	0.00220309	0.045997	0.0309757	0.0357095		0.956	0.0616116	0.0508925	0.00668971	0.0369417	0.0101016	-0.0254695	0.225304	0.249937	0.0589761	0.289204	0.0912984	0.125496
0.957	0.0765578	0.0574109	0.0387561	0.0176134	0	0	0.103672	0.212671	0.00211052	0.0464791	0.0309891	0.0356348		0.957	0.0622081	0.0516336	0.00718181	0.0373385	0.0106046	-0.0260377	0.22739	0.249391	0.0564567	0.28615	0.0946801	0.122051
0.958	0.0775744	0.0581795	0.0390108	0.0177183	0	0	0.104825	0.214613	0.00189445	0.0470096	0.0308706	0.0356439		0.958	0.0633032	0.052334	0.00764982	0.0376136	0.011001	-0.0266404	0.229508	0.24888	0.054021	0.283272	0.0969233	0.118637
0.959	0.0784855	0.058978	0.0390736	0.017853	0	0	0.10598	0.216698	0.00161462	0.0476109	0.0306448	0.0356824		0.959	0.0646771	0.052961	0.0080987	0.0377292	0.0112681	-0.0272115	0.231638	0.248856	0.051606	0.280696	0.0981143	0.115285
0.96	0.0793496	0.059848	0.0389831	0.0180461	0	0	0.107192	0.218952	0.0013256	0.0482696	0.0303905	0.0357799		0.96	0.0657951	0.0535606	0.00854367	0.0376991	0.0115101	-0.0276917	0.233738	0.249496	0.0491844	0.278507	0.0990837	0.112003
0.961	0.0802625	0.0608531	0.0387624	0.0183209	0	0	0.108435	0.221331	0.00108794	0.0489672	0.0300853	0.0360128		0.961	0.0662839	0.0542389	0.00899274	0.0375936	0.0118289	-0.0280646	0.235829	0.250578	0.0467419	0.276642	0.100352	0.108748
0.962	0.0812283	0.0620011	0.0384075	0.0186045	0	0	0.109602	0.223783	0.000969787	0.0497073	0.0297617	0.0363942		0.962	0.0662714	0.055016	0.00941364	0.0374686	0.0122596	-0.0283644	0.237999	0.251975	0.04427	0.27494	0.10196	0.105491
0.963	0.0821959	0.063271	0.0378746	0.0188323	0	0	0.110615	0.226266	0.000981574	0.050544	0.0296353	0.0368692		0.963	0.0659725	0.0558737	0.0097325	0.037322	0.0127103	-0.0286076	0.240267	0.253671	0.0417733	0.273387	0.104054	0.102245
0.964	0.083223	0.0646629	0.0371595	0.0190299	0	0	0.111482	0.228814	0.00107597	0.0515115	0.029752	0.0374231		0.964	0.0654146	0.0568141	0.0099413	0.0371214	0.013064	-0.0288015	0.242579	0.255861	0.0392693	0.272015	0.106927	0.0990444
0.965	0.0844077	0.0661415	0.0363086	0.019242	0	0	0.1123	0.231535	0.00121297	0.0525567	0.0298834	0.0381072		0.965	0.0646601	0.0578294	0.0100481	0.0368591	0.0133066	-0.0289574	0.244926	0.258927	0.0367265	0.270819	0.110319	0.0959232
0.966	0.0858889	0.0676222	0.0354743	0.0195282	0	0	0.113186	0.234347	0.00138552	0.0536204	0.0298835	0.0390093		0.966	0.0638061	0.0589038	0.0100401	0.036568	0.0134502	-0.0290964	0.247348	0.262791	0.034093	0.269828	0.113576	0.0929529
0.967	0.0874416	0.0690424	0.0348637	0.0199215	0	0	0.114152	0.236983	0.00159936	0.0546284	0.0298115	0.0402079		0.967	0.0631034	0.0600597	0.0099014	0.0362194	0.0135557	-0.0292407	0.249773	0.266912	0.0313498	0.268963	0.115526	0.0902038
0.968	0.0885078	0.0703874	0.0345858	0.0204302	0	0	0.115089	0.239319	0.00185734	0.0555654	0.0297725	0.0416678		0.968	0.0628894	0.0613392	0.0096208	0.0357526	0.0137446	-0.0293936	0.252035	0.270889	0.028493	0.268217	0.115985	0.0877131
0.969	0.0889567	0.0716475	0.03457	0.0210531	0	0	0.115953	0.241357	0.00216344	0.0564617	0.0298145	0.0433038		0.969	0.0632517	0.0627576	0.00918381	0.0351547	0.0140325	-0.0295411	0.254061	0.274442	0.0255467	0.267683	0.115922	0.0855187
0.97	0.0890649	0.0728075	0.0345867	0.0217939	0	0	0.11677	0.243094	0.00251481	0.0573359	0.0299536	0.0450434		0.97	0.0637957	0.064354	0.00858321	0.0344121	0.0143562	-0.0296818	0.255876	0.277362	0.0225824	0.267415	0.115881	0.0836018
0.971	0.0890396	0.0739245	0.0345009	0.0226412	0	0	0.117651	0.24451	0.00290379	0.0581909	0.030151	0.0469268		0.971	0.0639499	0.066148	0.00780626	0.0335255	0.0147231	-0.029806	0.257574	0.279522	0.0196593	0.267425	0.115862	0.0818793
0.972	0.0890372	0.0750773	0.0342571	0.0235462	0	0	0.11881	0.245602	0.00333243	0.059017	0.0303268	0.0490784		0.972	0.0635474	0.068085	0.00684505	0.0325014	0.0152059	-0.0298943	0.259282	0.280434	0.016788	0.267661	0.115878	0.0803039
0.973	0.0890354	0.0762735	0.0338316	0.0244383	0	0	0.120094	0.246417	0.00382	0.0597937	0.0304653	0.0515085		0.973	0.062745	0.0701457	0.00570582	0.0312885	0.0158368	-0.0299544	0.260744	0.279228	0.0139446	0.268191	0.115948	0.0789115
0.974	0.0889844	0.0775077	0.0332222	0.0252876	0	0	0.120912	0.246812	0.00437509	0.0605025	0.0306031	0.0541135		0.974	0.061704	0.0723107	0.00439808	0.0298807	0.0166052	-0.0300254	0.261407	0.275718	0.0110385	0.269014	0.116055	0.0778206
0.975	0.0888074	0.078743	0.0323745	0.0261385	0	0	0.121488	0.246466	0.00499561	0.0611311	0.0307792	0.0568063		0.975	0.0605897	0.0744856	0.00291766	0.028347	0.0174904	-0.0301385	0.261404	0.270382	0.00791279	0.270078	0.11613	0.0770712
0.976	0.0884457	0.0798865	0.0314863	0.0271021	0	0	0.121844	0.245079	0.00566997	0.0616596	0.0310054	0.0595266		0.976	0.0594312	0.0765952	0.00126572	0.026757	0.0184457	-0.0303173	0.260875	0.263517	0.00454374	0.271301	0.11605	0.0765933
0.977	0.0879114	0.0808552	0.0310076	0.0282619	0	0	0.121773	0.242366	0.00637704	0.0620602	0.031263	0.0622524		0.977	0.0581848	0.0786172	0	0.0251813	0.0194228	-0.0305645	0.259842	0.255223	0.00104099	0.27257	0.115705	0.0763047
0.978	0.087263	0.0816334	0.0310178	0.0296211	0	0	0.121338	0.238339	0.00709291	0.0623402	0.0315227	0.0649866		0.978	0.0568911	0.0805881	0	0.0236482	0.0204485	-0.0308788	0.258011	0.245678	0	0.273845	0.115058	0.0761383
0.979	0.0866155	0.0822279	0.0312249	0.0311508	0	0	0.120953	0.233319	0.00779086	0.0625419	0.0317975	0.0677949		0.979	0.0556741	0.0826038	0	0.0221438	0.02159	-0.0312549	0.255052	0.23513	0	0.275156	0.114091	0.0761203
0.98	0.0860962	0.0826379	0.0309107	0.0328282	0	0	0.120471	0.227476	0.00844137	0.0626819	0.0321033	0.0707968		0.98	0.0546135	0.0846838	0	0.0206247	0.0228838	-0.0316724	0.250658	0.223752	0	0.27658	0.112727	0.076335
0.981	0.0857735	0.0828117	0.0299169	0.0346364	0	0	0.119217	0.220794	0.00905174	0.0627804	0.0324197	0.0739294		0.981	0.0538869	0.086698	0	0.0190188	0.0243358	-0.032096	0.244614	0.21166	0	0.278133	0.110888	0.0767124
0.982	0.0856568	0.082637	0.0286344	0.0365817	0.000610784	0	0.116863	0.213272	0.00966608	0.0628575	0.0327451	0.0770289		0.982	0.0537703	0.088572	0	0.017271	0.0259271	-0.032528	0.236944	0.198873	0	0.279746	0.108648	0.0771457
0.983	0.0857485	0.0820195	0.0274075	0.0387012	0.00137143	0	0.113432	0.204964	0.0102905	0.062875	0.0331235	0.0800827		0.983	0.0543114	0.090274	0	0.0154128	0.0276228	-0.0330085	0.227851	0.185325	0	0.281363	0.106121	0.077649
0.984	0.086044	0.0809391	0.0265172	0.0410334	0.00215412	0	0.108898	0.195901	0.0108932	0.0627481	0.0336107	0.0832056		0.984	0.0553294	0.09178	0	0.0135379	0.0294159	-0.0335602	0.217483	0.17107	0	0.282966	0.103356	0.0783225
0.985	0.0865966	0.0794163	0.0260411	0.0435883	0.00290093	0	0.103213	0.186071	0.0114471	0.0623805	0.0342557	0.0864415		0.985	0.0566895	0.0930989	0	0.0117349	0.0312952	-0.0341952	0.205902	0.156275	0	0.284595	0.100428	0.0792051
0.986	0.0864267	0.0798022	0.0252634	0.0442917	0.00323995	0	0.10257	0.184158	0.0115145	0.0623166	0.0345114	0.0880686		0.986	0.0562437	0.0941422	0	0.0105931	0.0317945	-0.0343653	0.20402	0.153325	0	0.285614	0.0976334	0.0792849
0.987	0.0863911	0.0802067	0.0245118	0.0450344	0.00354881	0	0.101804	0.181993	0.0116026	0.0621718	0.0348511	0.0897753		0.987	0.0557227	0.0951911	0	0.0095866	0.0323228	-0.0345471	0.201937	0.149869	0	0.286835	0.0948703	0.0794709
0.988	0.0864187	0.0806204	0.0238027	0.0458248	0.00389049	0	0.100935	0.179574	0.0117598	0.06199	0.0352859	0.0915532		0.988	0.0549126	0.0962191	0	0.00869058	0.0328804	-0.0346575	0.199601	0.146107	0	0.288185	0.0925966	0.0797778
0.989	0.0864478	0.0810395	0.0232406	0.0466733	0.00424981	0	0.100016	0.176894	0.0120078	0.061758	0.0359028	0.0934003		0.989	0.0537048	0.0972562	0	0.00790632	0.0334723	-0.0346819	0.197025	0.14193	0	0.289502	0.0914792	0.0802368
0.99	0.0864404	0.0814188	0.0228776	0.0475927	0.0045571	0	0.099065	0.173906	0.0123261	0.0614541	0.0367028	0.0953097		0.99	0.0522629	0.0983502	0	0.00726599	0.0341398	-0.0346868	0.194216	0.13687	0	0.290701	0.0915184	0.0808341
0.991	0.0863869	0.0816791	0.0226672	0.048557	0.00480537	0	0.0980271	0.17056	0.0127023	0.0611226	0.0376072	0.0972687		0.991	0.0510769	0.0995134	0	0.00675258	0.0348898	-0.0347282	0.191186	0.130757	0	0.291844	0.0918479	0.0815009
0.992	0.0863352	0.0817679	0.0225852	0.0494931	0.00506331	0	0.0968643	0.166814	0.0131194	0.0608021	0.0386168	0.0992478		0.992	0.0504165	0.100739	0	0.00628966	0.035688	-0.0348488	0.187944	0.123792	0	0.292969	0.0918452	0.0821992
0.993	0.0863371	0.0816628	0.0226474	0.0503953	0.00536391	0	0.0955551	0.162632	0.0135529	0.0604719	0.0396489	0.101197		0.993	0.050168	0.102028	0	0.00582486	0.0365477	-0.035048	0.184474	0.11602	0	0.294048	0.0913483	0.0829272
0.994	0.0863707	0.0813755	0.0229253	0.0513399	0.00569626	0	0.0941105	0.157982	0.0139902	0.0600396	0.0404462	0.103096		0.994	0.0502176	0.103344	0	0.00533534	0.037541	-0.0353308	0.180759	0.107299	0	0.294996	0.0900403	0.0836891
0.995	0.0863147	0.0809339	0.023456	0.0523844	0.00605661	0	0.0925895	0.152782	0.0144336	0.0594388	0.0409793	0.104965		0.995	0.0505556	0.104656	0	0.00479368	0.0386973	-0.0357091	0.176795	0.0972326	0	0.295791	0.0873254	0.0844955
0.996	0.0860333	0.080353	0.0242292	0.0535627	0.0064501	0	0.0909374	0.146888	0.0148868	0.0587197	0.0415271	0.106871		0.996	0.0511684	0.105963	0	0.00416669	0.0399936	-0.0361838	0.172414	0.0851109	0	0.296481	0.0834247	0.0853657
0.997	0.0853726	0.0796505	0.0251617	0.0548856	0.0068351	0	0.0889592	0.140289	0.0153552	0.0579535	0.0422101	0.10883		0.997	0.052037	0.107249	0	0.00338843	0.041389	-0.0367415	0.167258	0.0707225	0	0.297102	0.0793424	0.0862971
0.998	0.0844337	0.0788596	0.0261039	0.0563313	0.00716419	0	0.0866004	0.133137	0.0158466	0.0572067	0.0429463	0.110799		0.998	0.0529541	0.108461	0	0.0024875	0.0428008	-0.0373677	0.161162	0.0544957	0	0.297686	0.0770495	0.0872599
0.999	0.0835907	0.077987	0.0268208	0.0578368	0.00747766	0	0.0839871	0.125407	0.0163611	0.0564872	0.0436827	0.112739		0.999	0.0535893	0.109536	0	0.00161484	0.0441516	-0.0380462	0.154168	0.0367351	0	0.298249	0.0770227	0.0882311
1	0.0830341	0.0770111	0.0272449	0.0593846	0.00781769	0	0.0811587	0.116833	0.0168881	0.0557692	0.044404	0.114628		1	0.0536435	0.110485	0	0.000876213	0.0454986	-0.0387614	0.146336	0.0175992	0	0.29881	0.0778136	0.0891971

## Sheet: HbProfiles-stauD3
Figure 1-source data
HbProfiles-stauD3(dorsal)															HbProfiles-stauD3(ventral)
time(min) x/L	2.5	7.5	12.5	17.5	22.5	27.5	32.5	37.5	42.5	47.5	52.5	57.5			time(min) x/L	2.5	7.5	12.5	17.5	22.5	27.5	32.5	37.5	42.5	47.5	52.5	57.5
0.001	NaN	NaN	NaN	NaN	NaN	NaN	NaN	NaN	NaN	NaN	NaN	NaN			0.001	NaN	NaN	NaN	NaN	NaN	NaN	NaN	NaN	NaN	NaN	NaN	NaN
0.002	NaN	NaN	NaN	NaN	NaN	NaN	NaN	NaN	NaN	NaN	NaN	NaN			0.002	NaN	NaN	NaN	NaN	NaN	NaN	NaN	NaN	NaN	NaN	NaN	NaN
0.003	NaN	NaN	NaN	NaN	NaN	NaN	NaN	NaN	NaN	NaN	NaN	NaN			0.003	NaN	NaN	NaN	NaN	NaN	NaN	NaN	NaN	NaN	NaN	NaN	NaN
0.004	NaN	NaN	NaN	NaN	NaN	NaN	NaN	NaN	NaN	NaN	NaN	NaN			0.004	NaN	NaN	NaN	NaN	NaN	NaN	NaN	NaN	NaN	NaN	NaN	NaN
0.005	NaN	NaN	NaN	NaN	NaN	NaN	NaN	NaN	NaN	NaN	NaN	NaN			0.005	NaN	NaN	NaN	NaN	NaN	NaN	NaN	NaN	NaN	NaN	NaN	NaN
0.006	NaN	NaN	NaN	NaN	NaN	NaN	NaN	NaN	NaN	NaN	NaN	NaN			0.006	NaN	NaN	NaN	NaN	NaN	NaN	NaN	NaN	NaN	NaN	NaN	NaN
0.007	NaN	NaN	NaN	NaN	NaN	NaN	NaN	NaN	NaN	NaN	NaN	NaN			0.007	NaN	NaN	NaN	NaN	NaN	NaN	NaN	NaN	NaN	NaN	NaN	NaN
0.008	NaN	NaN	NaN	NaN	NaN	NaN	NaN	NaN	NaN	NaN	NaN	NaN			0.008	NaN	NaN	NaN	NaN	NaN	NaN	NaN	NaN	NaN	NaN	NaN	NaN
0.009	NaN	NaN	NaN	-0.0707711	0.000948272	NaN	NaN	NaN	NaN	NaN	NaN	NaN			0.009	NaN	NaN	NaN	NaN	NaN	NaN	NaN	NaN	NaN	NaN	NaN	NaN
0.01	NaN	NaN	0.0590361	0.0532212	0.0280339	0.0127069	NaN	NaN	NaN	NaN	NaN	NaN			0.01	NaN	NaN	0.151814	0.168299	0.00456888	0.0180886	NaN	NaN	NaN	NaN	NaN	NaN
0.011	NaN	NaN	0.149247	0.111066	0.109901	0.0742263	0.0817209	0.051539	-0.0622631	NaN	0.268645	NaN			0.011	NaN	NaN	0.157113	0.180278	0.098135	0.0522284	0.142304	0.132521	-0.255571	NaN	0.206647	NaN
0.012	NaN	NaN	0.144367	0.140755	0.135057	0.104939	0.121236	0.052263	-0.000799709	NaN	0.272831	NaN			0.012	NaN	NaN	0.168947	0.235546	0.0984101	0.0950777	0.159651	-0.0147144	-0.116508	NaN	0.28943	NaN
0.013	NaN	NaN	0.156482	0.180748	0.134113	0.0778075	0.132181	0.0448259	0.00532028	NaN	0.296689	NaN			0.013	NaN	NaN	0.209046	0.263409	0.152991	0.19873	0.156119	0.0430818	-0.0542495	NaN	0.236859	NaN
0.014	NaN	NaN	0.17461	0.21553	0.187269	0.0754332	0.151709	0.0367433	0.0312845	-0.00116499	0.295289	-0.313636			0.014	NaN	NaN	0.199493	0.309238	0.176769	0.157383	0.196971	0.0771736	-0.023821	0.0893536	0.332802	NaN
0.015	NaN	NaN	0.209651	0.236978	0.195492	0.100105	0.148792	0.0383402	0.0765719	0.101915	0.292798	-0.282435			0.015	NaN	NaN	0.191263	0.291482	0.202665	0.160706	0.192779	0.0815189	0.0338039	-0.0613861	0.33559	-0.332168
0.016	NaN	NaN	0.214053	0.23419	0.237216	0.119259	0.163595	0.0489341	0.0853849	0.110296	0.301809	-0.240508			0.016	NaN	NaN	0.226161	0.30143	0.27581	0.171339	0.21533	0.084242	0.0537689	0.0542759	0.239855	-0.265734
0.017	NaN	NaN	0.217249	0.216451	0.187348	0.127572	0.171662	0.0297811	0.0631986	0.146103	0.304423	-0.0605544			0.017	NaN	NaN	0.208437	0.212734	0.218602	0.199656	0.201693	0.0559166	0.0727568	0.0730324	0.290673	-0.0503274
0.018	NaN	NaN	0.242625	0.234987	0.227766	0.111263	0.167692	0.0621596	0.108533	NaN	0.194809	0.0603542			0.018	NaN	NaN	0.243079	0.295121	0.238804	0.141695	0.210699	0.0725198	0.0527318	NaN	0.217133	0.0171328
0.019	NaN	NaN	0.251775	0.234933	0.256455	0.117594	0.16495	0.0802951	0.121628	0.179586	0.125743	0.0600232			0.019	NaN	NaN	0.24334	0.304142	0.241741	0.216362	0.212273	0.0989518	0.0836612	0.103508	0.148142	0.0424166
0.02	NaN	NaN	0.249121	0.229467	0.250826	0.127178	0.175706	0.0790184	0.132347	0.101553	0.127783	-0.135536			0.02	NaN	NaN	0.255533	0.302405	0.223342	0.206159	0.220161	0.0999048	0.126878	0.0660405	0.078117	-0.183146
0.021	NaN	NaN	0.253354	0.242013	0.237197	0.140062	0.185835	0.104543	0.131968	0.130951	0.0887018	0.0388769			0.021	NaN	NaN	0.231643	0.309674	0.239041	0.197727	0.23497	0.124762	0.110619	0.0817066	0.0640059	-0.0631599
0.022	NaN	NaN	0.238832	0.262298	0.247118	0.136561	0.189721	0.100899	0.123647	0.163261	0.136656	0.0888103			0.022	NaN	NaN	0.230175	0.338807	0.265106	0.202311	0.239198	0.124462	0.129796	0.116194	0.107311	-0.0799622
0.023	NaN	NaN	0.228495	0.242744	0.20667	0.112483	0.202146	0.130953	0.141195	0.171132	0.151595	0.0449735			0.023	NaN	NaN	0.24226	0.367429	0.220272	0.221437	0.271212	0.146298	0.14392	0.115198	0.138114	-0.0438616
0.024	NaN	NaN	0.230389	0.265409	0.242749	0.150259	0.204071	0.121949	0.147039	0.195469	0.156986	0.0748427			0.024	NaN	NaN	0.238012	0.352838	0.278185	0.216261	0.259548	0.136286	0.155359	0.131359	0.162666	-0.0126435
0.025	NaN	NaN	0.218471	0.27196	0.305187	0.163076	0.209142	0.139009	0.160018	0.168639	0.152476	0.0680631			0.025	NaN	NaN	0.245463	0.360192	0.356195	0.223595	0.265535	0.165477	0.169993	0.117064	0.155307	-0.0140839
0.026	NaN	NaN	0.225996	0.24807	0.267143	0.156938	0.1931	0.119081	0.179769	0.217122	0.185052	0.0949701			0.026	NaN	NaN	0.256657	0.320106	0.274234	0.230965	0.242425	0.151471	0.185227	0.176121	0.193901	0.00134255
0.027	NaN	NaN	0.249991	0.211954	0.272725	0.161069	0.207206	0.126872	0.159053	0.224796	0.153541	0.0806771			0.027	NaN	NaN	0.257525	0.281808	0.280961	0.233633	0.267244	0.160009	0.139621	0.233437	0.173518	0.0107729
0.028	NaN	NaN	0.274027	0.263042	0.276183	0.164477	0.224617	0.108381	0.194391	0.237943	0.195267	0.0956612			0.028	NaN	NaN	0.242828	0.35058	0.28501	0.242938	0.27016	0.139157	0.186966	0.216014	0.200388	0.0143474
0.029	NaN	NaN	0.266892	0.296608	0.251726	0.164367	0.237147	0.144215	0.184472	0.237469	0.179421	0.125745			0.029	NaN	NaN	0.259081	0.387805	0.274956	0.243228	0.289191	0.176109	0.196599	0.2199	0.196469	0.0515014
0.03	NaN	NaN	0.262917	0.286229	0.28806	0.170723	0.22298	0.141109	0.169757	0.245587	0.205728	0.167193			0.03	NaN	NaN	0.259464	0.325552	0.303801	0.238485	0.275287	0.185561	0.196805	0.2259	0.231074	0.0841882
0.031	NaN	NaN	0.279436	0.304269	0.262559	0.154889	0.227908	0.107983	0.19679	0.243023	0.208275	0.109688			0.031	NaN	NaN	0.270074	0.350518	0.273433	0.259332	0.276749	0.163362	0.213971	0.200072	0.230096	0.0831728
0.032	NaN	NaN	0.289673	0.31121	0.270857	0.172345	0.231277	0.147702	0.21167	0.240349	0.193002	0.1127			0.032	NaN	NaN	0.292208	0.354543	0.279543	0.241179	0.276645	0.190858	0.257923	0.185652	0.201744	0.0902928
0.033	NaN	NaN	0.273917	0.30095	0.277748	0.174662	0.234343	0.186296	0.224767	0.269182	0.206732	0.135403			0.033	NaN	NaN	0.291269	0.393003	0.29967	0.272631	0.274842	0.221593	0.25102	0.23695	0.227839	0.0932862
0.034	NaN	NaN	0.266475	0.283607	0.287744	0.178743	0.231022	0.157909	0.209114	0.298667	0.203123	0.128858			0.034	NaN	NaN	0.28828	0.394371	0.325278	0.283822	0.28113	0.202973	0.153322	0.264164	0.22249	0.116037
0.035	NaN	NaN	0.258816	0.288097	0.311021	0.189845	0.253775	0.158451	0.208701	0.246978	0.184862	0.0936322			0.035	NaN	NaN	0.297293	0.406038	0.362887	0.271393	0.283112	0.200965	0.212205	0.221456	0.202182	0.0789709
0.036	NaN	NaN	0.243782	0.315202	0.275234	0.190928	0.243029	0.154988	0.239972	0.274705	0.174324	0.124448			0.036	NaN	NaN	0.313312	0.374756	0.313425	0.276172	0.293461	0.193505	0.233168	0.239412	0.188846	0.0727246
0.037	NaN	NaN	0.253739	0.257684	0.306851	0.21822	0.245978	0.156379	0.239541	0.27642	0.208443	0.138928			0.037	NaN	NaN	0.305959	0.265896	0.325738	0.283511	0.283699	0.197985	0.229233	0.274249	0.213067	0.128268
0.038	NaN	NaN	0.257025	0.279318	0.287334	0.236585	0.231242	0.164864	0.221321	0.267306	0.185927	0.197856			0.038	NaN	NaN	0.342043	0.386211	0.332517	0.339629	0.286739	0.213574	0.200191	0.255455	0.217084	0.16922
0.039	NaN	NaN	0.281204	0.25201	0.294889	0.21557	0.240644	0.145543	0.181609	0.235549	0.212183	0.144884			0.039	NaN	NaN	0.30058	0.394325	0.325891	0.295799	0.284517	0.186722	0.188824	0.230934	0.206156	0.121684
0.04	NaN	NaN	0.277891	0.307927	0.301316	0.210071	0.25579	0.163931	0.213906	0.268188	0.231438	0.135553			0.04	NaN	NaN	0.331168	0.40146	0.290512	0.298063	0.33103	0.242234	0.216281	0.236148	0.231743	0.134733
0.041	NaN	NaN	0.309397	0.317868	0.3129	0.218131	0.248446	0.160493	0.234873	0.293394	0.221865	0.14106			0.041	NaN	NaN	0.332378	0.386213	0.373272	0.306965	0.30097	0.221244	0.248861	0.253226	0.22343	0.138666
0.042	NaN	NaN	0.295925	0.318337	0.323882	0.235054	0.258811	0.17162	0.209552	0.242183	0.215185	0.121772			0.042	NaN	NaN	0.342117	0.38714	0.298049	0.306976	0.310655	0.219124	0.174947	0.215861	0.241708	0.112819
0.043	NaN	NaN	0.31024	0.34505	0.32434	0.229284	0.253588	0.158067	0.236133	0.275564	0.226016	0.13511			0.043	NaN	NaN	0.309799	0.404951	0.314909	0.319681	0.309025	0.206745	0.206373	0.25741	0.236086	0.10801
0.044	NaN	NaN	0.294184	0.330535	0.303822	0.235502	0.262161	0.16933	0.22657	0.280883	0.180927	0.160189			0.044	NaN	NaN	0.317832	0.433385	0.33862	0.327328	0.322606	0.214265	0.22563	0.257239	0.215252	0.143756
0.045	NaN	NaN	0.299215	0.383001	0.38581	0.252241	0.275957	0.174409	0.218454	0.271553	0.187585	0.154785			0.045	NaN	NaN	0.319544	0.453365	0.344051	0.336378	0.323723	0.226051	0.246488	0.25446	0.221083	0.153179
0.046	NaN	NaN	0.30181	0.346289	0.331158	0.246763	0.268625	0.183966	0.277186	0.265997	0.207621	0.148306			0.046	NaN	NaN	0.32977	0.470783	0.362205	0.340182	0.323427	0.234031	0.300122	0.274819	0.246848	0.161716
0.047	NaN	NaN	0.29267	0.346304	0.325455	0.237054	0.276164	0.170048	0.213197	0.304787	0.222417	0.207472			0.047	NaN	NaN	0.31913	0.464035	0.366547	0.344726	0.328828	0.229362	0.186367	0.267891	0.24678	0.189074
0.048	NaN	NaN	0.311821	0.390091	0.310983	0.262218	0.271947	0.182531	0.24376	0.331255	0.230599	0.181451			0.048	NaN	NaN	0.317265	0.414804	0.359631	0.343939	0.318516	0.239386	0.215354	0.279976	0.265992	0.152076
0.049	NaN	NaN	0.300402	0.370703	0.308193	0.226905	0.28611	0.192724	0.230877	0.277089	0.226406	0.18008			0.049	NaN	NaN	0.360603	0.439673	0.347395	0.367707	0.368657	0.21366	0.184233	0.250028	0.262714	0.153554
0.05	NaN	NaN	0.370546	0.382895	0.355605	0.262199	0.269892	0.205072	0.253168	0.264217	0.210394	0.167756			0.05	NaN	NaN	0.393492	0.448744	0.359474	0.385862	0.347943	0.250425	0.218404	0.240273	0.284321	0.157303
0.051	NaN	NaN	0.317455	0.354601	0.347255	0.263972	0.280087	0.206108	0.32102	0.289376	0.236579	0.135094			0.051	NaN	NaN	0.361783	0.427623	0.347407	0.392664	0.348235	0.233852	0.287134	0.266326	0.287764	0.103163
0.052	NaN	NaN	0.324571	0.35282	0.367496	0.286317	0.299495	0.204304	0.249792	0.286395	0.242056	0.171631			0.052	NaN	NaN	0.365751	0.448128	0.341285	0.393188	0.355752	0.265611	0.253128	0.258423	0.259942	0.181351
0.053	NaN	NaN	0.320523	0.349173	0.381498	0.269445	0.284275	0.219818	0.250467	0.279469	0.260521	0.181964			0.053	NaN	NaN	0.396859	0.42015	0.3437	0.356669	0.343704	0.270778	0.257323	0.282892	0.286485	0.184496
0.054	NaN	NaN	0.331856	0.350837	0.387035	0.296023	0.297988	0.266898	0.25269	0.295918	0.237718	0.202959			0.054	NaN	NaN	0.391255	0.502331	0.424436	0.384239	0.388873	0.330889	0.261009	0.286789	0.267793	0.174058
0.055	NaN	NaN	0.35677	0.380225	0.347785	0.294112	0.296818	0.213261	0.268164	0.312653	0.239571	0.227793			0.055	NaN	NaN	0.388525	0.4768	0.375051	0.394714	0.373756	0.280563	0.304363	0.296314	0.304493	0.296085
0.056	NaN	NaN	0.377714	0.377635	0.370483	0.314587	0.300562	0.22121	0.216122	0.363597	0.242256	0.194232			0.056	NaN	NaN	0.386131	0.479714	0.381126	0.413483	0.365851	0.270512	0.23646	0.317872	0.309204	0.162111
0.057	NaN	NaN	0.365947	0.393627	0.396957	0.296955	0.309549	0.21494	0.234037	0.28543	0.25791	0.181732			0.057	NaN	NaN	0.418593	0.512363	0.382302	0.436105	0.395068	0.294032	0.196303	0.250478	0.327918	0.168643
0.058	NaN	NaN	0.353379	0.39843	0.388321	0.301659	0.314161	0.221346	0.2825	0.324231	0.255371	0.204372			0.058	NaN	NaN	0.423781	0.498927	0.367394	0.462029	0.424646	0.300447	0.294224	0.330359	0.319227	0.213817
0.059	NaN	NaN	0.316388	0.411624	0.386866	0.296917	0.305965	0.238661	0.293713	0.331957	0.264839	0.192227			0.059	NaN	NaN	0.394714	0.465006	0.397247	0.490245	0.404588	0.286617	0.338522	0.292093	0.31034	0.171255
0.06	NaN	NaN	0.274592	0.418999	0.396473	0.27462	0.332311	0.239439	0.311188	0.314828	0.255684	0.22445			0.06	NaN	NaN	0.419031	0.480635	0.405485	0.451807	0.391769	0.299625	0.311994	0.264766	0.304509	0.242359
0.061	NaN	NaN	0.352209	0.384511	0.376725	0.306653	0.343993	0.245956	0.293963	0.322079	0.265945	0.201666			0.061	NaN	NaN	0.43775	0.469511	0.360809	0.440657	0.413535	0.317958	0.324537	0.343805	0.341174	0.233807
0.062	NaN	NaN	0.284489	0.344836	0.379581	0.286303	0.329985	0.251579	0.326856	0.325628	0.297449	0.201476			0.062	NaN	NaN	0.450173	0.469706	0.403836	0.465296	0.422572	0.33578	0.285262	0.325361	0.348372	0.26537
0.063	NaN	NaN	0.325196	0.372436	0.382081	0.336951	0.356595	0.260295	0.31092	0.37515	0.303933	0.33016			0.063	NaN	NaN	0.424063	0.534576	0.385397	0.486315	0.417863	0.330228	0.306232	0.407188	0.34293	0.299445
0.064	NaN	NaN	0.332563	0.380205	0.412618	0.294353	0.374198	0.249829	0.235973	0.337686	0.283736	0.223359			0.064	NaN	NaN	0.436846	0.500971	0.422535	0.449267	0.46583	0.346624	0.236925	0.351562	0.323892	0.242362
0.065	NaN	NaN	0.38245	0.369382	0.376351	0.322949	0.356358	0.251097	0.3666	0.288167	0.332102	0.244141			0.065	NaN	NaN	0.443447	0.550076	0.39627	0.435976	0.446486	0.356283	0.423827	0.307008	0.347667	0.268618
0.066	NaN	NaN	0.385362	0.375007	0.382829	0.316503	0.33553	0.203231	0.31725	0.354209	0.316513	0.207675			0.066	NaN	NaN	0.464789	0.568991	0.414274	0.431326	0.497432	0.326752	0.351967	0.324102	0.344951	0.251296
0.067	NaN	NaN	0.402807	0.457528	0.337259	0.351094	0.355582	0.256954	0.320189	0.348643	0.303202	0.234927			0.067	NaN	NaN	0.484804	0.556153	0.444339	0.479866	0.46303	0.380365	0.30532	0.295227	0.363447	0.280653
0.068	NaN	NaN	0.377524	0.446821	0.405282	0.379964	0.357418	0.27092	0.305802	0.368094	0.308302	0.262752			0.068	NaN	NaN	0.472683	0.520637	0.443118	0.503833	0.451574	0.407757	0.364638	0.33094	0.325671	0.262027
0.069	NaN	NaN	0.385782	0.441281	0.418777	0.36475	0.367015	0.289709	0.343281	0.384241	0.327563	0.269012			0.069	NaN	NaN	0.45438	0.491633	0.439543	0.481649	0.466406	0.414462	0.380461	0.364986	0.364265	0.276562
0.07	NaN	NaN	0.37912	0.407814	0.427425	0.362701	0.371082	0.299813	0.318126	0.430364	0.320912	0.250782			0.07	NaN	NaN	0.447751	0.54071	0.43558	0.502779	0.470953	0.40549	0.370275	0.428345	0.373132	0.302652
0.071	NaN	NaN	0.319396	0.440551	0.411621	0.362524	0.367689	0.27175	0.330288	0.407921	0.319843	0.260988			0.071	NaN	NaN	0.451507	0.531304	0.470494	0.519369	0.476343	0.367359	0.312569	0.38209	0.388609	0.317764
0.072	NaN	NaN	0.456729	0.482172	0.42084	0.359376	0.358778	0.310968	0.319616	0.399948	0.295877	0.313304			0.072	NaN	NaN	0.471069	0.548918	0.511369	0.510893	0.491087	0.419943	0.394862	0.378064	0.414757	0.348089
0.073	NaN	NaN	0.40469	0.486666	0.44501	0.35929	0.378797	0.2895	0.364334	0.411826	0.356146	0.280543			0.073	NaN	NaN	0.468098	0.572619	0.455799	0.53506	0.478446	0.427007	0.394502	0.374951	0.370269	0.330637
0.074	NaN	NaN	0.388395	0.449284	0.479389	0.35313	0.419352	0.288892	0.395304	0.409731	0.325896	0.264663			0.074	NaN	NaN	0.527278	0.570747	0.469566	0.531247	0.501086	0.449825	0.398555	0.402261	0.365318	0.298324
0.075	NaN	NaN	0.387547	0.481795	0.455067	0.355168	0.413161	0.355503	0.370987	0.419643	0.36168	0.284651			0.075	NaN	NaN	0.571444	0.601522	0.430882	0.555687	0.517295	0.478566	0.383993	0.429375	0.382554	0.320105
0.076	NaN	NaN	0.396605	0.482874	0.449421	0.390616	0.395801	0.309789	0.364071	0.430739	0.373918	0.292257			0.076	NaN	NaN	0.584236	0.614477	0.472236	0.529927	0.513596	0.438187	0.407092	0.430765	0.390908	0.325405
0.077	NaN	NaN	0.41358	0.498839	0.444722	0.391113	0.412353	0.333246	0.376978	0.4463	0.369966	0.292146			0.077	NaN	NaN	0.53555	0.595503	0.445213	0.53839	0.541992	0.430899	0.380252	0.439225	0.404377	0.386689
0.078	NaN	NaN	0.402923	0.434798	0.459529	0.396091	0.408402	0.310462	0.362526	0.480416	0.373439	0.312084			0.078	NaN	NaN	0.52221	0.620614	0.47486	0.518563	0.542297	0.448916	0.406239	0.51093	0.451459	0.389653
0.079	NaN	NaN	0.397186	0.449904	0.447454	0.388883	0.419387	0.327635	0.387601	0.466521	0.399558	0.316952			0.079	NaN	NaN	0.527742	0.54054	0.460339	0.558328	0.549936	0.510243	0.408288	0.450765	0.416813	0.342745
0.08	NaN	NaN	0.382685	0.446296	0.436962	0.436813	0.424827	0.336706	0.394606	0.40236	0.398699	0.411843			0.08	NaN	NaN	0.517431	0.569367	0.493594	0.588726	0.534779	0.509248	0.442224	0.38867	0.423055	0.429644
0.081	NaN	NaN	0.423394	0.437548	0.456953	0.440175	0.431676	0.351945	0.344588	0.44742	0.415841	0.323151			0.081	NaN	NaN	0.527286	0.6403	0.517068	0.587059	0.538762	0.501916	0.399619	0.410442	0.442498	0.393991
0.082	NaN	NaN	0.411752	0.458758	0.477482	0.449735	0.436491	0.379677	0.364441	0.473535	0.429167	0.298422			0.082	NaN	NaN	0.540105	0.593474	0.500532	0.601605	0.533427	0.487202	0.453696	0.449768	0.43401	0.37103
0.083	NaN	NaN	0.426685	0.501292	0.471068	0.45942	0.440267	0.353373	0.423999	0.470865	0.410177	0.306715			0.083	NaN	NaN	0.606522	0.582143	0.558206	0.624905	0.554167	0.539329	0.430515	0.444215	0.449394	0.443613
0.084	NaN	NaN	0.423301	0.519516	0.564144	0.437808	0.438018	0.368046	0.501356	0.475216	0.321477	0.317235			0.084	NaN	NaN	0.646499	0.596417	0.498597	0.609142	0.607459	0.528604	0.574798	0.477731	0.449433	0.462771
0.085	NaN	NaN	0.420333	0.569751	0.52035	0.463285	0.464365	0.399268	0.459156	0.548835	0.418113	0.29583			0.085	NaN	NaN	0.594513	0.613961	0.518765	0.644647	0.582722	0.559288	0.489314	0.563567	0.45417	0.453445
0.086	NaN	NaN	0.426145	0.664544	0.475278	0.466421	0.462342	0.409919	0.44587	0.490083	0.418558	0.288139			0.086	NaN	NaN	0.570641	0.689135	0.508259	0.627844	0.606031	0.568045	0.413056	0.507922	0.449804	0.496268
0.087	NaN	NaN	0.429151	0.548132	0.528996	0.445781	0.473698	0.398962	0.479669	0.476473	0.434656	0.278792			0.087	NaN	NaN	0.629654	0.663204	0.528834	0.620133	0.590621	0.571768	0.455939	0.485378	0.489917	0.441233
0.088	NaN	NaN	0.442778	0.539234	0.520269	0.446589	0.4674	0.405338	0.475185	0.467978	0.425289	0.303149			0.088	NaN	NaN	0.578399	0.644372	0.604368	0.632972	0.608359	0.551135	0.524975	0.50105	0.457964	0.502535
0.089	NaN	NaN	0.395603	0.50172	0.509874	0.469292	0.463671	0.408409	0.415561	0.505104	0.456173	0.305464			0.089	NaN	NaN	0.580475	0.662177	0.556149	0.644772	0.60338	0.563003	0.456214	0.503733	0.50134	0.490337
0.09	NaN	NaN	0.414976	0.457746	0.48931	0.460358	0.470748	0.390736	0.46172	0.520669	0.479828	0.323531			0.09	NaN	NaN	0.572241	0.572101	0.562539	0.680071	0.570023	0.554129	0.498113	0.539946	0.524251	0.506871
0.091	NaN	NaN	0.427442	0.492159	0.453494	0.470613	0.459572	0.377223	0.462119	0.515617	0.445955	0.355314			0.091	NaN	NaN	0.581578	0.624238	0.56779	0.6747	0.605293	0.529551	0.518593	0.536752	0.522643	0.548228
0.092	NaN	NaN	0.443456	0.484993	0.465252	0.49885	0.490104	0.397012	0.462996	0.594208	0.432934	0.361646			0.092	NaN	NaN	0.615513	0.595203	0.544716	0.64677	0.642186	0.591112	0.520921	0.614805	0.496874	0.553177
0.093	NaN	NaN	0.424569	0.528875	0.391727	0.481197	0.507689	0.409821	0.515943	0.536032	0.432229	0.355964			0.093	NaN	NaN	0.655966	0.590458	0.550244	0.665383	0.637451	0.591515	0.58233	0.596609	0.514462	0.552589
0.094	NaN	NaN	0.449988	0.554319	0.483351	0.512021	0.490526	0.43631	0.452804	0.520205	0.492104	0.344841			0.094	NaN	NaN	0.655153	0.660987	0.535304	0.653102	0.620807	0.609539	0.513293	0.538736	0.528915	0.58721
0.095	NaN	NaN	0.464845	0.488814	0.515225	0.500235	0.477403	0.424911	0.445365	0.46818	0.496363	0.369866			0.095	NaN	NaN	0.663988	0.650442	0.506059	0.625581	0.633896	0.602147	0.575209	0.442963	0.570594	0.543707
0.096	NaN	NaN	0.468597	0.510988	0.523267	0.529667	0.492004	0.45623	0.500423	0.527034	0.486614	0.37974			0.096	NaN	NaN	0.675146	0.642723	0.559315	0.663965	0.637504	0.624488	0.552169	0.593864	0.516901	0.566175
0.097	NaN	NaN	0.460295	0.521134	0.582255	0.546006	0.497564	0.530963	0.522254	0.520052	0.496096	0.419234			0.097	NaN	NaN	0.701694	0.658678	0.535629	0.694993	0.638248	0.681891	0.59225	0.5714	0.531628	0.572385
0.098	NaN	NaN	0.463365	0.563813	0.629772	0.549501	0.52384	0.498126	0.48681	0.551295	0.505338	0.415968			0.098	NaN	NaN	0.659395	0.688428	0.56474	0.707994	0.635982	0.646937	0.620728	0.625724	0.537348	0.574732
0.099	NaN	NaN	0.47705	0.500277	0.578669	0.53085	0.524151	0.489641	0.519681	0.587458	0.505363	0.406608			0.099	NaN	NaN	0.645852	0.673454	0.621499	0.705163	0.629158	0.642167	0.585208	0.591093	0.552436	0.579207
0.1	NaN	NaN	0.499766	0.537984	0.596753	0.51877	0.522312	0.473846	0.514947	0.64174	0.524783	0.453534			0.1	NaN	NaN	0.601727	0.56742	0.631104	0.706687	0.646798	0.636223	0.611762	0.692038	0.567968	0.527426
0.101	NaN	NaN	0.462111	0.532187	0.57808	0.518225	0.515915	0.487648	0.506475	0.574651	0.55169	0.433985			0.101	NaN	NaN	0.661612	0.630616	0.642756	0.704824	0.684681	0.608426	0.551478	0.596939	0.612678	0.598211
0.102	NaN	NaN	0.487629	0.542813	0.54606	0.524648	0.528397	0.483844	0.551232	0.542988	0.54851	0.443371			0.102	NaN	NaN	0.652942	0.631508	0.627195	0.720773	0.672013	0.611471	0.598203	0.59993	0.572736	0.568321
0.103	NaN	NaN	0.466694	0.567282	0.533142	0.504637	0.529688	0.459286	0.522038	0.572614	0.51256	0.44026			0.103	NaN	NaN	0.604906	0.742955	0.622492	0.71298	0.703274	0.55399	0.570291	0.604229	0.570224	0.579421
0.104	NaN	NaN	0.538822	0.624918	0.499951	0.533325	0.55137	0.474528	0.529279	0.568593	0.552944	0.465804			0.104	NaN	NaN	0.708707	0.717283	0.645007	0.763962	0.687619	0.611253	0.579116	0.625975	0.582075	0.620945
0.105	NaN	NaN	0.456496	0.614037	0.485749	0.57204	0.551351	0.471224	0.538894	0.584624	0.57166	0.524523			0.105	NaN	NaN	0.671136	0.694993	0.622999	0.765251	0.676931	0.642536	0.620453	0.64316	0.559405	0.641678
0.106	NaN	NaN	0.458858	0.596871	0.519828	0.594132	0.533092	0.485323	0.480935	0.621606	0.559832	0.520279			0.106	NaN	NaN	0.696408	0.681441	0.607326	0.762061	0.693659	0.671559	0.555533	0.691368	0.569225	0.665095
0.107	NaN	NaN	0.495981	0.538598	0.574438	0.613317	0.563823	0.487593	0.591505	0.677067	0.559543	0.511639			0.107	NaN	NaN	0.683841	0.659619	0.574849	0.764047	0.6727	0.694282	0.654954	0.801223	0.610254	0.627321
0.108	NaN	NaN	0.495764	0.544806	0.571992	0.601337	0.576792	0.53104	0.537663	0.590681	0.59008	0.504852			0.108	NaN	NaN	0.685302	0.668445	0.647252	0.758801	0.658542	0.705941	0.569135	0.724152	0.597521	0.620299
0.109	NaN	NaN	0.52246	0.552276	0.604536	0.61071	0.564227	0.539829	0.540222	0.573517	0.596268	0.451944			0.109	NaN	NaN	0.699856	0.673914	0.640392	0.763999	0.646869	0.748762	0.647041	0.694604	0.590324	0.65979
0.11	NaN	NaN	0.556085	0.41679	0.570205	0.675746	0.593384	0.570962	0.543822	0.568586	0.599855	0.46272			0.11	NaN	NaN	0.762541	0.631075	0.616912	0.804016	0.698909	0.706641	0.682764	0.662572	0.586362	0.685172
0.111	NaN	NaN	0.573506	0.532953	0.571622	0.623376	0.611296	0.568897	0.547287	0.583149	0.606259	0.46413			0.111	NaN	NaN	0.766247	0.723291	0.660073	0.768581	0.681054	0.704295	0.67534	0.691282	0.595643	0.665005
0.112	NaN	NaN	0.557518	0.592881	0.564118	0.574724	0.604391	0.5929	0.586899	0.592842	0.618119	0.480698			0.112	NaN	NaN	0.780022	0.706462	0.652979	0.761952	0.682788	0.657757	0.717357	0.669539	0.607815	0.695631
0.113	NaN	NaN	0.597464	0.627317	0.578528	0.561196	0.600586	0.57996	0.571879	0.651791	0.578113	0.539957			0.113	NaN	NaN	0.782248	0.754921	0.666561	0.765579	0.702136	0.681418	0.685764	0.683536	0.604127	0.72701
0.114	NaN	NaN	0.621757	0.636485	0.59969	0.550727	0.588625	0.619934	0.525741	0.701329	0.610864	0.510601			0.114	NaN	NaN	0.772606	0.75529	0.639831	0.737395	0.706276	0.670381	0.650908	0.772211	0.626863	0.698912
0.115	NaN	NaN	0.619927	0.642583	0.567715	0.583647	0.593792	0.575436	0.586183	0.673098	0.604338	0.512162			0.115	NaN	NaN	0.795071	0.714145	0.652446	0.765328	0.673758	0.709601	0.661309	0.696686	0.62151	0.728957
0.116	NaN	NaN	0.536213	0.606766	0.581976	0.579735	0.61446	0.570571	0.550564	0.670468	0.602877	0.512569			0.116	NaN	NaN	0.785952	0.680263	0.678956	0.758094	0.6961	0.705241	0.667253	0.726118	0.637827	0.712743
0.117	NaN	NaN	0.525614	0.60775	0.602459	0.630027	0.595144	0.563557	0.654866	0.634938	0.602042	0.542506			0.117	NaN	NaN	0.783665	0.704267	0.688398	0.765711	0.705288	0.746239	0.680829	0.755977	0.614686	0.693896
0.118	NaN	NaN	0.545938	0.615226	0.586422	0.632422	0.572224	0.612973	0.630668	0.596443	0.61138	0.542954			0.118	NaN	NaN	0.67301	0.75292	0.656997	0.777188	0.711524	0.715226	0.710078	0.672468	0.636313	0.724825
0.119	NaN	NaN	0.540257	0.589465	0.6198	0.672823	0.612488	0.573717	0.649882	0.644523	0.618398	0.557313			0.119	NaN	NaN	0.701619	0.756407	0.658577	0.779386	0.723557	0.685697	0.724248	0.722581	0.637334	0.71963
0.12	NaN	NaN	0.534141	0.555714	0.642289	0.668079	0.608353	0.613392	0.627871	0.647694	0.617982	0.567082			0.12	NaN	NaN	0.713911	0.797131	0.757484	0.770163	0.71739	0.710376	0.707829	0.745394	0.627612	0.724099
0.121	NaN	NaN	0.606732	0.540258	0.633741	0.667953	0.588387	0.578474	0.642667	0.716551	0.631859	0.554508			0.121	NaN	NaN	0.731881	0.795642	0.65083	0.778231	0.722945	0.624423	0.720185	0.828606	0.617819	0.735136
0.122	NaN	NaN	0.568542	0.611349	0.642028	0.651946	0.661966	0.619891	0.631443	0.633577	0.598483	0.621041			0.122	NaN	NaN	0.773966	0.787119	0.655014	0.777882	0.753403	0.669666	0.731419	0.721434	0.617704	0.828923
0.123	NaN	NaN	0.572094	0.635045	0.620586	0.654172	0.643235	0.654964	0.569764	0.626348	0.611177	0.579732			0.123	NaN	NaN	0.786536	0.742832	0.69038	0.79259	0.746366	0.697927	0.667333	0.729185	0.62389	0.753773
0.124	NaN	NaN	0.598582	0.635798	0.657537	0.655552	0.654651	0.661111	0.624959	0.710253	0.666448	0.567392			0.124	NaN	NaN	0.806554	0.798759	0.670295	0.793539	0.715212	0.727103	0.732856	0.692703	0.678652	0.753553
0.125	NaN	NaN	0.624161	0.648844	0.636258	0.648112	0.62934	0.676912	0.616463	0.72268	0.661052	0.523096			0.125	NaN	NaN	0.769375	0.723327	0.67132	0.789175	0.718572	0.734389	0.718388	0.703829	0.657205	0.750297
0.126	NaN	NaN	0.649548	0.664642	0.651399	0.635703	0.630643	0.636902	0.612544	0.759645	0.666988	0.485576			0.126	NaN	NaN	0.862975	0.714792	0.693249	0.767335	0.704539	0.790124	0.686954	0.739444	0.604907	0.766193
0.127	NaN	NaN	0.603258	0.650573	0.658619	0.637972	0.596893	0.644508	0.636247	0.734528	0.658264	0.551107			0.127	NaN	NaN	0.714517	0.64181	0.676522	0.754633	0.735975	0.757931	0.66471	0.730284	0.657954	0.787138
0.128	NaN	NaN	0.57758	0.664061	0.613479	0.665588	0.595917	0.630075	0.634394	0.738489	0.637665	0.55871			0.128	NaN	NaN	0.73568	0.700517	0.716599	0.778919	0.724413	0.745662	0.65981	0.74949	0.650756	0.799521
0.129	NaN	NaN	0.595838	0.637269	0.620229	0.694305	0.616619	0.623346	0.668112	0.765186	0.642591	0.587332			0.129	NaN	NaN	0.747594	0.711164	0.680692	0.793352	0.706843	0.72142	0.699829	0.829527	0.64481	0.777916
0.13	NaN	NaN	0.579878	0.626428	0.683379	0.681928	0.638438	0.598284	0.69344	0.745382	0.667425	0.65002			0.13	NaN	NaN	0.754086	0.729832	0.721162	0.80883	0.727805	0.696705	0.723936	0.713546	0.672857	0.760042
0.131	NaN	NaN	0.615153	0.581725	0.67858	0.656899	0.636958	0.628446	0.660194	0.759977	0.665119	0.615821			0.131	NaN	NaN	0.810044	0.790091	0.706901	0.831893	0.740173	0.715053	0.736595	0.73259	0.625434	0.750847
0.132	NaN	NaN	0.634049	0.673177	0.669037	0.634233	0.669403	0.666177	0.730358	0.779759	0.644273	0.635968			0.132	NaN	NaN	0.840805	0.814858	0.671887	0.833994	0.752511	0.712279	0.713072	0.718112	0.664081	0.708352
0.133	NaN	NaN	0.676778	0.649576	0.658724	0.631013	0.672296	0.704827	0.727189	0.70198	0.69867	0.613565			0.133	NaN	NaN	0.85097	0.785101	0.737126	0.812508	0.74456	0.713777	0.702876	0.738635	0.669489	0.736323
0.134	NaN	NaN	0.590406	0.600724	0.666827	0.655362	0.63269	0.701471	0.689977	0.72183	0.708033	0.594821			0.134	NaN	NaN	0.776615	0.788057	0.736549	0.790856	0.734353	0.720601	0.692647	0.768888	0.66442	0.725258
0.135	NaN	NaN	0.696789	0.672872	0.667111	0.68049	0.701475	0.715652	0.669114	0.712573	0.750327	0.609343			0.135	NaN	NaN	0.787466	0.763157	0.743906	0.788968	0.727837	0.770458	0.717848	0.782194	0.677611	0.688127
0.136	NaN	NaN	0.69429	0.641879	0.686994	0.672151	0.677255	0.72357	0.669232	0.747912	0.708566	0.61056			0.136	NaN	NaN	0.768464	0.698482	0.762161	0.765174	0.738877	0.732854	0.716699	0.853048	0.654127	0.675103
0.137	NaN	NaN	0.678758	0.648241	0.656043	0.649746	0.646185	0.683788	0.668755	0.718945	0.700478	0.622369			0.137	NaN	NaN	0.869365	0.683722	0.742138	0.76312	0.723093	0.751126	0.675485	0.758728	0.656342	0.721659
0.138	NaN	NaN	0.631387	0.639943	0.664416	0.687519	0.6501	0.67847	0.653458	0.743414	0.655025	0.664222			0.138	NaN	NaN	0.78998	0.695621	0.738567	0.764793	0.717551	0.710336	0.670067	0.71781	0.678869	0.826104
0.139	NaN	NaN	0.664691	0.627601	0.661652	0.717754	0.666168	0.683757	0.678445	0.738784	0.643042	0.645273			0.139	NaN	NaN	0.771205	0.748915	0.704964	0.787941	0.733506	0.772304	0.703494	0.734007	0.649183	0.762147
0.14	NaN	NaN	0.658397	0.691125	0.659614	0.699375	0.652032	0.603554	0.650331	0.736056	0.659543	0.656033			0.14	NaN	NaN	0.755481	0.753907	0.706231	0.80229	0.762847	0.682386	0.706475	0.751928	0.65201	0.821429
0.141	NaN	NaN	0.65544	0.649801	0.6691	0.744314	0.672862	0.647855	0.697376	0.737407	0.693327	0.631041			0.141	NaN	NaN	0.768644	0.802379	0.679972	0.823069	0.759846	0.733985	0.716442	0.722597	0.672509	0.791946
0.142	NaN	NaN	0.642484	0.690824	0.675872	0.756734	0.712164	0.630988	0.713618	0.743618	0.688203	0.59615			0.142	NaN	NaN	0.80843	0.857583	0.71853	0.819844	0.788602	0.744325	0.732355	0.757227	0.666672	0.800163
0.143	NaN	NaN	0.627901	0.696686	0.694606	0.794164	0.70068	0.656528	0.76133	0.764785	0.694441	0.584146			0.143	NaN	NaN	0.845591	0.828786	0.69271	0.846743	0.796418	0.776288	0.734453	0.790099	0.674185	0.796368
0.144	NaN	NaN	0.618722	0.710376	0.759604	0.842022	0.703326	0.682243	0.761621	0.780252	0.705837	0.623003			0.144	NaN	NaN	0.861311	0.867422	0.707426	0.847731	0.785753	0.762761	0.736936	0.772782	0.657287	0.75203
0.145	NaN	NaN	0.692311	0.747204	0.776088	0.781744	0.717236	0.709078	0.801214	0.796773	0.718466	0.64596			0.145	NaN	NaN	0.863019	0.854465	0.699105	0.805171	0.768326	0.758908	0.684229	0.793204	0.638576	0.757985
0.146	NaN	NaN	0.668943	0.744578	0.727119	0.75206	0.684994	0.748637	0.721086	0.768956	0.745957	0.672513			0.146	NaN	NaN	0.863549	0.715158	0.734866	0.753688	0.727892	0.776181	0.723235	0.829029	0.668675	0.717333
0.147	NaN	NaN	0.682985	0.718826	0.720477	0.713858	0.692305	0.756036	0.681679	0.796123	0.746454	0.722787			0.147	NaN	NaN	0.853893	0.651213	0.701794	0.765697	0.740511	0.734709	0.687666	0.794912	0.673836	0.739834
0.148	NaN	NaN	0.752517	0.678389	0.688862	0.725754	0.705961	0.754515	0.643074	0.748844	0.710728	0.671666			0.148	NaN	NaN	0.824636	0.662228	0.755029	0.755182	0.740744	0.681342	0.716142	0.759115	0.704537	0.740462
0.149	NaN	NaN	0.674531	0.690046	0.704662	0.698714	0.710869	0.717315	0.670476	0.781711	0.720105	0.660864			0.149	NaN	NaN	0.790043	0.706867	0.754016	0.816669	0.741501	0.700923	0.690465	0.753479	0.673578	0.738773
0.15	NaN	NaN	0.767824	0.708613	0.713082	0.746746	0.727639	0.741855	0.690372	0.777785	0.727034	0.616198			0.15	NaN	NaN	0.771443	0.693934	0.730894	0.862668	0.766727	0.684042	0.712518	0.781004	0.678595	0.753177
0.151	NaN	NaN	0.765481	0.689768	0.692675	0.755299	0.720454	0.704956	0.692564	0.790465	0.678536	0.635799			0.151	NaN	NaN	0.797785	0.779694	0.694508	0.861694	0.806756	0.692976	0.716944	0.859101	0.685372	0.763538
0.152	NaN	NaN	0.758932	0.667115	0.680585	0.724247	0.715153	0.671244	0.720201	0.759806	0.725991	0.629626			0.152	NaN	NaN	0.778097	0.8023	0.730316	0.847121	0.789308	0.731706	0.701542	0.717299	0.701416	0.734008
0.153	NaN	NaN	0.730813	0.655979	0.660873	0.703839	0.724157	0.6874	0.699809	0.783113	0.717641	0.660188			0.153	NaN	NaN	0.760076	0.949504	0.744111	0.792134	0.801484	0.718757	0.710515	0.732149	0.672776	0.733778
0.154	NaN	NaN	0.665781	0.770645	0.697887	0.732524	0.70659	0.659799	0.781543	0.738075	0.720112	0.623437			0.154	NaN	NaN	0.823146	0.912716	0.754028	0.841877	0.806247	0.74834	0.72254	0.738167	0.670545	0.729062
0.155	NaN	NaN	0.683147	0.765563	0.704147	0.731761	0.722852	0.684267	0.773774	0.737207	0.725313	0.681928			0.155	NaN	NaN	0.86561	0.88157	0.709479	0.824308	0.774503	0.742258	0.734	0.728738	0.651293	0.77296
0.156	NaN	NaN	0.622991	0.748002	0.746532	0.740928	0.703582	0.696643	0.726576	0.785435	0.764816	0.677444			0.156	NaN	NaN	0.831786	0.848344	0.767567	0.789871	0.770271	0.736409	0.702953	0.755415	0.655399	0.709191
0.157	NaN	NaN	0.685013	0.702293	0.686786	0.777511	0.682598	0.724911	0.767898	0.765942	0.785559	0.722258			0.157	NaN	NaN	0.8691	0.800723	0.798962	0.784452	0.744919	0.756166	0.747835	0.757909	0.652044	0.720637
0.158	NaN	NaN	0.715838	0.68047	0.689922	0.756403	0.670616	0.699708	0.743081	0.834779	0.814595	0.692728			0.158	NaN	NaN	0.873277	0.782546	0.712655	0.791852	0.744734	0.743968	0.731949	0.838407	0.723216	0.763931
0.159	NaN	NaN	0.704735	0.690813	0.710345	0.780342	0.719067	0.726758	0.705639	0.779699	0.769707	0.688014			0.159	NaN	NaN	0.905827	0.759027	0.700167	0.776001	0.75282	0.742186	0.767892	0.808558	0.695634	0.734684
0.16	NaN	NaN	0.74294	0.709153	0.706236	0.823636	0.735505	0.731902	0.675464	0.785197	0.769109	0.677094			0.16	NaN	NaN	0.828212	0.74112	0.730792	0.768316	0.758709	0.792749	0.704041	0.744099	0.69201	0.745164
0.161	NaN	NaN	0.768573	0.693919	0.758214	0.795537	0.74843	0.721588	0.722783	0.770957	0.754336	0.666537			0.161	NaN	NaN	0.814627	0.625974	0.700878	0.830622	0.79752	0.753137	0.742174	0.773838	0.672117	0.685421
0.162	NaN	NaN	0.77449	0.786264	0.744875	0.80943	0.742343	0.725185	0.686647	0.812136	0.722708	0.688162			0.162	NaN	NaN	0.798498	0.685877	0.744273	0.870623	0.774966	0.726943	0.709855	0.746	0.661537	0.735719
0.163	NaN	NaN	0.74915	0.788642	0.777443	0.82379	0.748879	0.728672	0.714736	0.807565	0.734884	0.700692			0.163	NaN	NaN	0.836128	0.758048	0.757992	0.880774	0.782307	0.745763	0.758605	0.691755	0.669614	0.803169
0.164	NaN	NaN	0.706749	0.788225	0.745046	0.750185	0.747517	0.733114	0.763563	0.784737	0.760903	0.68549			0.164	NaN	NaN	0.845613	0.790701	0.765315	0.859319	0.801213	0.737622	0.720376	0.702119	0.65999	0.768228
0.165	NaN	NaN	0.624555	0.721533	0.728307	0.764809	0.728884	0.719183	0.733414	0.865918	0.743026	0.668466			0.165	NaN	NaN	0.822391	0.847201	0.815201	0.882427	0.762849	0.71053	0.727005	0.79383	0.678447	0.711687
0.166	NaN	NaN	0.672519	0.698839	0.746558	0.771022	0.742985	0.716819	0.751646	0.810086	0.726767	0.6365			0.166	NaN	NaN	0.824394	0.839006	0.818577	0.84199	0.787709	0.678228	0.721775	0.730292	0.670596	0.717327
0.167	NaN	NaN	0.646474	0.723152	0.730251	0.782287	0.717064	0.706277	0.761819	0.837844	0.779884	0.666408			0.167	NaN	NaN	0.835014	0.825121	0.793055	0.800432	0.794485	0.715368	0.769313	0.783892	0.653059	0.701751
0.168	NaN	NaN	0.639179	0.618228	0.73418	0.721352	0.726794	0.76972	0.782027	0.84916	0.784033	0.652177			0.168	NaN	NaN	0.826605	0.719362	0.814564	0.806818	0.769092	0.708056	0.694848	0.805624	0.662832	0.700165
0.169	NaN	NaN	0.718488	0.606586	0.762776	0.712673	0.736937	0.703385	0.767	0.819304	0.778205	0.625258			0.169	NaN	NaN	0.911253	0.771503	0.728297	0.804313	0.792042	0.749376	0.726475	0.766941	0.669591	0.686471
0.17	NaN	NaN	0.706552	0.657306	0.738378	0.766909	0.738955	0.724156	0.757984	0.814131	0.793406	0.700262			0.17	NaN	NaN	0.880842	0.758975	0.735824	0.766071	0.795805	0.752191	0.726986	0.747023	0.684553	0.733781
0.171	NaN	NaN	0.734239	0.686609	0.810943	0.76935	0.741041	0.763772	0.705405	0.842769	0.77995	0.685447			0.171	NaN	NaN	0.84974	0.769653	0.708718	0.813515	0.826155	0.715262	0.737646	0.697618	0.691341	0.719682
0.172	NaN	NaN	0.780205	0.770896	0.781124	0.756144	0.732522	0.748482	0.713203	0.819045	0.765803	0.728693			0.172	NaN	NaN	0.876202	0.747511	0.725586	0.818746	0.796031	0.716864	0.740419	0.749816	0.695496	0.74485
0.173	NaN	NaN	0.777191	0.890101	0.794236	0.788938	0.731874	0.726998	0.738367	0.876197	0.739629	0.68319			0.173	NaN	NaN	0.84089	0.74321	0.740521	0.824313	0.776459	0.724616	0.774459	0.86034	0.671616	0.684207
0.174	NaN	NaN	0.80923	0.858636	0.803494	0.782817	0.740435	0.726193	0.703954	0.803255	0.733609	0.661177			0.174	NaN	NaN	0.879705	0.772412	0.75146	0.823027	0.769343	0.728108	0.713218	0.76232	0.672102	0.680274
0.175	NaN	NaN	0.783546	0.84593	0.766181	0.819614	0.795582	0.727611	0.712006	0.81767	0.802374	0.667651			0.175	NaN	NaN	0.841324	0.792237	0.733977	0.841037	0.772367	0.781083	0.697015	0.76528	0.643323	0.696461
0.176	NaN	NaN	0.716379	0.814006	0.750351	0.841286	0.768884	0.701227	0.706464	0.782856	0.775334	0.693826			0.176	NaN	NaN	0.816407	0.796583	0.788546	0.812043	0.776559	0.776125	0.704388	0.730853	0.643029	0.724109
0.177	NaN	NaN	0.699127	0.753722	0.680837	0.843	0.731005	0.674305	0.718734	0.826152	0.780655	0.719503			0.177	NaN	NaN	0.838422	0.741036	0.834979	0.851822	0.79744	0.722751	0.713637	0.767354	0.670779	0.717243
0.178	NaN	NaN	0.691238	0.688333	0.698579	0.844679	0.734215	0.669257	0.720025	0.80736	0.781384	0.72096			0.178	NaN	NaN	0.891303	0.747989	0.837753	0.83322	0.794731	0.786469	0.686337	0.684045	0.659544	0.684198
0.179	NaN	NaN	0.749701	0.641137	0.665727	0.826565	0.764005	0.715176	0.7391	0.800644	0.772986	0.647103			0.179	NaN	NaN	0.869236	0.736817	0.818229	0.8712	0.795097	0.729685	0.69738	0.73705	0.657494	0.714658
0.18	NaN	NaN	0.932418	0.644787	0.751417	0.827998	0.786884	0.731142	0.766448	0.863701	0.795249	0.724848			0.18	NaN	NaN	0.814696	0.835161	0.824109	0.871409	0.79268	0.730954	0.725971	0.753876	0.680027	0.740564
0.181	NaN	NaN	0.576917	0.660369	0.815716	0.812022	0.773179	0.714366	0.743921	0.801674	0.787424	0.635159			0.181	NaN	NaN	0.8436	0.801107	0.735337	0.889723	0.827746	0.728857	0.717228	0.719509	0.70875	0.694794
0.182	NaN	NaN	0.766948	0.658218	0.773692	0.792621	0.777966	0.699857	0.731877	0.790187	0.780169	0.625762			0.182	NaN	NaN	0.847307	0.785955	0.775771	0.864175	0.802914	0.72099	0.706097	0.658775	0.691222	0.695229
0.183	NaN	NaN	0.790849	0.799307	0.815861	0.789018	0.759027	0.738887	0.750636	0.840785	0.787171	0.672251			0.183	NaN	NaN	0.920838	0.846394	0.754081	0.843945	0.791607	0.741597	0.769394	0.683454	0.679049	0.671981
0.184	NaN	NaN	0.789113	0.821677	0.771877	0.790861	0.75671	0.72558	0.757823	0.767144	0.802329	0.629582			0.184	NaN	NaN	0.884974	0.800239	0.773599	0.841296	0.789932	0.728264	0.725898	0.720602	0.689342	0.702375
0.185	NaN	NaN	0.791529	0.801163	0.794411	0.752909	0.750417	0.722466	0.738869	0.823668	0.775145	0.670808			0.185	NaN	NaN	0.860219	0.83448	0.792782	0.789779	0.773715	0.761139	0.71398	0.629874	0.691527	0.686869
0.186	NaN	NaN	0.740945	0.790622	0.763465	0.743484	0.764747	0.735865	0.71062	0.781919	0.762154	0.662445			0.186	NaN	NaN	0.888364	0.835597	0.777583	0.814491	0.782276	0.738099	0.712025	0.706276	0.678492	0.666449
0.187	NaN	NaN	0.666458	0.788393	0.780287	0.778296	0.734915	0.699262	0.728743	0.841896	0.760498	0.668654			0.187	NaN	NaN	0.935908	0.779901	0.75993	0.81355	0.804198	0.758396	0.737032	0.739405	0.707186	0.714265
0.188	NaN	NaN	0.676056	0.738811	0.749357	0.771281	0.730002	0.672042	0.71555	0.776449	0.785439	0.767119			0.188	NaN	NaN	0.885693	0.770915	0.801982	0.804847	0.818224	0.775053	0.738468	0.732577	0.663411	0.833666
0.189	NaN	NaN	0.726994	0.727909	0.758496	0.787045	0.72887	0.70236	0.728823	0.827914	0.790801	0.662092			0.189	NaN	NaN	0.825797	0.797061	0.794507	0.833039	0.803362	0.753558	0.757644	0.708719	0.684567	0.690046
0.19	NaN	NaN	0.743328	0.671353	0.690235	0.804597	0.786319	0.681885	0.712054	0.840789	0.766314	0.678845			0.19	NaN	NaN	0.816881	0.804718	0.797357	0.86636	0.822154	0.749201	0.746651	0.706924	0.680489	0.701225
0.191	NaN	NaN	0.93659	0.679652	0.735222	0.759514	0.780119	0.70266	0.686366	0.79801	0.788464	0.639871			0.191	NaN	NaN	0.883564	0.777265	0.807005	0.939093	0.833046	0.755598	0.723094	0.703506	0.699313	0.698795
0.192	NaN	NaN	0.828552	0.662793	0.770522	0.841349	0.780357	0.720774	0.712327	0.819277	0.806786	0.686916			0.192	NaN	NaN	0.867146	0.814652	0.77918	0.923829	0.82709	0.713666	0.723037	0.689856	0.707325	0.712527
0.193	NaN	NaN	0.734921	0.696578	0.803693	0.849058	0.787077	0.729476	0.688265	0.79125	0.759964	0.647282			0.193	NaN	NaN	0.913472	0.806256	0.79813	0.923082	0.797771	0.755528	0.705548	0.710417	0.703166	0.709928
0.194	NaN	NaN	0.70204	0.793967	0.80922	0.818808	0.799438	0.720205	0.693926	0.856485	0.744499	0.658458			0.194	NaN	NaN	0.946608	0.747745	0.844006	0.926054	0.786137	0.734967	0.707225	0.776056	0.663721	0.70789
0.195	NaN	NaN	0.618483	0.759769	0.75261	0.81736	0.792846	0.665944	0.669098	0.757939	0.752222	0.661504			0.195	NaN	NaN	0.940496	0.802678	0.790711	0.884495	0.796117	0.745708	0.71289	0.724651	0.685907	0.720698
0.196	NaN	NaN	0.57078	0.774339	0.745818	0.778755	0.771319	0.696582	0.68256	0.772351	0.752273	0.712199			0.196	NaN	NaN	0.941407	0.810782	0.811922	0.850755	0.80315	0.741665	0.69302	0.742705	0.701146	0.744423
0.197	NaN	NaN	0.705806	0.742293	0.782349	0.663301	0.740348	0.645218	0.723018	0.776746	0.771288	0.69832			0.197	NaN	NaN	0.899176	0.898093	0.837808	0.871589	0.826465	0.73969	0.705749	0.720194	0.705846	0.71304
0.198	NaN	NaN	0.712619	0.773506	0.740527	0.785942	0.77595	0.657827	0.673354	0.808361	0.810322	0.65432			0.198	NaN	NaN	0.851385	0.822854	0.774511	0.849838	0.824258	0.721287	0.673877	0.737754	0.713734	0.723443
0.199	NaN	NaN	0.802213	0.704582	0.724584	0.846751	0.75956	0.655016	0.719526	0.828161	0.77457	0.618083			0.199	NaN	NaN	0.823458	0.754542	0.806854	0.844582	0.828691	0.770989	0.737962	0.738171	0.685912	0.67556
0.2	NaN	NaN	0.797555	0.753454	0.80771	0.857397	0.763971	0.66517	0.724247	0.758219	0.786013	0.682904			0.2	NaN	NaN	0.878602	0.786263	0.867875	0.850611	0.829393	0.753609	0.732986	0.727084	0.678617	0.647412
0.201	NaN	NaN	0.812074	0.737241	0.776638	0.857615	0.798459	0.664681	0.726334	0.8024	0.809014	0.694564			0.201	NaN	NaN	0.855903	0.760164	0.813265	0.874463	0.815205	0.746699	0.763458	0.68548	0.657834	0.65787
0.202	NaN	NaN	0.770442	0.79472	0.718935	0.874761	0.790009	0.682029	0.677976	0.846925	0.773419	0.686053			0.202	NaN	NaN	0.852325	0.79899	0.811985	0.89725	0.82459	0.744806	0.72045	0.756575	0.672408	0.670887
0.203	NaN	NaN	0.822664	0.745681	0.71692	0.89156	0.813192	0.685135	0.669659	0.827053	0.784037	0.737098			0.203	NaN	NaN	0.920864	0.793526	0.781747	0.879115	0.811913	0.747284	0.707338	0.711053	0.665217	0.688456
0.204	NaN	NaN	0.880281	0.724964	0.734401	0.90895	0.813749	0.689969	0.680436	0.82523	0.774621	0.731422			0.204	NaN	NaN	0.89032	0.827529	0.789171	0.893066	0.840716	0.733425	0.679377	0.712344	0.692539	0.689425
0.205	NaN	NaN	0.862644	0.702624	0.7751	0.862697	0.79708	0.645041	0.674682	0.810611	0.760824	0.792027			0.205	NaN	NaN	0.937313	0.788741	0.847396	0.855274	0.811722	0.712051	0.689077	0.716267	0.666545	0.754456
0.206	NaN	NaN	0.776096	0.753355	0.743032	0.839114	0.805931	0.67482	0.731883	0.831558	0.743782	0.65542			0.206	NaN	NaN	0.959124	0.830225	0.792202	0.855656	0.831016	0.692066	0.7162	0.692335	0.676033	0.674404
0.207	NaN	NaN	0.685229	0.736529	0.749745	0.815234	0.801421	0.662876	0.635419	0.80726	0.745309	0.68571			0.207	NaN	NaN	0.955283	0.802618	0.734632	0.828406	0.811499	0.663606	0.727538	0.677915	0.644421	0.694991
0.208	NaN	NaN	0.623674	0.737794	0.742093	0.79966	0.792484	0.659244	0.66839	0.839655	0.764023	0.657085			0.208	NaN	NaN	0.934233	0.808989	0.80565	0.801389	0.846815	0.692829	0.746538	0.681572	0.638206	0.692948
0.209	NaN	NaN	0.675812	0.75468	0.752476	0.806796	0.815817	0.667485	0.687348	0.831684	0.789655	0.641481			0.209	NaN	NaN	0.849294	0.767181	0.770186	0.814126	0.832826	0.743762	0.757989	0.768801	0.656376	0.713771
0.21	NaN	NaN	0.706899	0.751281	0.804364	0.814402	0.790736	0.666541	0.693712	0.812856	0.785588	0.666158			0.21	NaN	NaN	0.824927	0.758525	0.792911	0.822718	0.852997	0.76781	0.755349	0.72793	0.671034	0.666739
0.211	NaN	NaN	0.782096	0.728303	0.811728	0.849119	0.798899	0.682404	0.719803	0.780281	0.771169	0.665451			0.211	NaN	NaN	0.806181	0.845382	0.79029	0.872259	0.861059	0.749143	0.715742	0.718002	0.670037	0.685263
0.212	NaN	NaN	0.806339	0.734956	0.830607	0.846872	0.807581	0.695273	0.735508	0.783912	0.783129	0.646281			0.212	NaN	NaN	0.807328	0.756464	0.804156	0.875924	0.81613	0.786029	0.646188	0.718894	0.655999	0.660098
0.213	NaN	NaN	0.947698	0.743863	0.876191	0.87157	0.806163	0.68782	0.690588	0.80274	0.707228	0.76098			0.213	NaN	NaN	0.925453	0.763087	0.778897	0.834606	0.809476	0.796419	0.702128	0.639912	0.668367	0.81814
0.214	NaN	NaN	0.924542	0.799678	0.775621	0.814082	0.789859	0.670115	0.726152	0.810579	0.704105	0.64261			0.214	NaN	NaN	0.900742	0.806352	0.788663	0.850693	0.786967	0.796899	0.719605	0.701764	0.679854	0.621167
0.215	NaN	NaN	0.930496	0.70656	0.792307	0.885261	0.804973	0.74177	0.658881	0.803663	0.732707	0.676061			0.215	NaN	NaN	0.937518	0.885948	0.799374	0.83659	0.839261	0.768431	0.732853	0.710361	0.689727	0.654257
0.216	NaN	NaN	0.936905	0.772522	0.77323	0.865512	0.82062	0.760711	0.712708	0.757882	0.698702	0.746147			0.216	NaN	NaN	0.938252	0.786756	0.82364	0.819057	0.838934	0.74901	0.746769	0.810977	0.694205	0.657719
0.217	NaN	NaN	0.812445	0.729953	0.767128	0.862863	0.817994	0.740053	0.674183	0.779355	0.691171	0.728038			0.217	NaN	NaN	0.875124	0.821637	0.819228	0.810895	0.831393	0.697688	0.736375	0.714456	0.684879	0.646597
0.218	NaN	NaN	0.708413	0.702647	0.761307	0.860694	0.805683	0.720374	0.638113	0.762904	0.712392	0.701759			0.218	NaN	NaN	0.88399	0.863003	0.830246	0.786168	0.838814	0.70547	0.717047	0.727615	0.662274	0.629509
0.219	NaN	NaN	0.601547	0.726568	0.731779	0.871367	0.820851	0.712464	0.666891	0.811777	0.744099	0.695078			0.219	NaN	NaN	0.854296	0.75535	0.82879	0.795488	0.819518	0.711932	0.72603	0.737964	0.684892	0.646559
0.22	NaN	NaN	0.618523	0.800667	0.757817	0.887785	0.832032	0.688977	0.781599	0.833348	0.719461	0.677392			0.22	NaN	NaN	0.83495	0.738008	0.756677	0.768405	0.864161	0.711579	0.722921	0.648677	0.676078	0.608087
0.221	NaN	NaN	0.714331	0.84742	0.754632	0.858018	0.821614	0.705476	0.690793	0.792964	0.752188	0.600255			0.221	NaN	NaN	0.827368	0.744283	0.790576	0.809554	0.828951	0.77079	0.740493	0.673249	0.67623	0.654734
0.222	NaN	NaN	0.815611	0.791299	0.803874	0.826561	0.800444	0.661662	0.673541	0.821822	0.736324	0.709945			0.222	NaN	NaN	0.824509	0.722574	0.769042	0.876031	0.872999	0.734568	0.744366	0.63384	0.691942	0.727366
0.223	NaN	NaN	0.933289	0.752599	0.777667	0.813792	0.812912	0.68258	0.681171	0.813837	0.720852	0.685947			0.223	NaN	NaN	0.878422	0.711033	0.781585	0.888898	0.841936	0.740579	0.736731	0.728247	0.694652	0.645907
0.224	NaN	NaN	0.905676	0.710409	0.822944	0.779169	0.813018	0.674157	0.660609	0.711458	0.743146	0.675462			0.224	NaN	NaN	0.915513	0.756822	0.733063	0.903223	0.858504	0.802783	0.758972	0.739107	0.696045	0.665024
0.225	NaN	NaN	0.86524	0.653213	0.802836	0.750037	0.823272	0.699395	0.683689	0.740863	0.729377	0.680111			0.225	NaN	NaN	0.92173	0.853274	0.75862	0.868797	0.832412	0.784392	0.79847	0.668563	0.690869	0.680647
0.226	NaN	NaN	0.88912	0.775088	0.827121	0.803088	0.787337	0.697421	0.633175	0.750097	0.758518	0.694253			0.226	NaN	NaN	0.909757	0.7849	0.737609	0.879893	0.814906	0.773336	0.746848	0.715207	0.700106	0.662248
0.227	NaN	NaN	0.860665	0.744037	0.752341	0.803936	0.828905	0.70592	0.652878	0.771923	0.759525	0.666793			0.227	NaN	NaN	0.906697	0.876624	0.776789	0.858606	0.817224	0.757568	0.770706	0.693851	0.72431	0.672719
0.228	NaN	NaN	0.899888	0.77133	0.752198	0.837207	0.825726	0.719904	0.661926	0.74563	0.722681	0.627353			0.228	NaN	NaN	0.888562	0.814815	0.779725	0.801207	0.819661	0.750924	0.711322	0.691734	0.738798	0.6959
0.229	NaN	NaN	0.778194	0.821774	0.714079	0.869195	0.832521	0.703748	0.664739	0.805627	0.738862	0.608468			0.229	NaN	NaN	0.904237	0.800155	0.791534	0.816681	0.850007	0.763363	0.755567	0.709694	0.700965	0.677787
0.23	NaN	NaN	0.671526	0.821582	0.769211	0.895709	0.829933	0.691823	0.707574	0.794123	0.714855	0.710807			0.23	NaN	NaN	0.820197	0.857441	0.777307	0.799875	0.852374	0.718126	0.728572	0.699286	0.706669	0.722386
0.231	NaN	NaN	0.697033	0.765655	0.806309	0.887773	0.815443	0.641566	0.699147	0.805466	0.714348	0.682728			0.231	NaN	NaN	0.786202	0.83919	0.836779	0.850833	0.859901	0.704673	0.704251	0.778436	0.721876	0.656546
0.232	NaN	NaN	0.708654	0.750984	0.824062	0.890915	0.807451	0.710416	0.68443	0.805364	0.72993	0.677334			0.232	NaN	NaN	0.769595	0.783048	0.650023	0.78821	0.847763	0.640456	0.713852	0.673883	0.715368	0.64776
0.233	NaN	NaN	0.772579	0.706174	0.826196	0.87895	0.793804	0.637748	0.671366	0.828939	0.753701	0.610515			0.233	NaN	NaN	0.757249	0.705819	0.733391	0.784245	0.83692	0.731971	0.756475	0.700414	0.708122	0.61049
0.234	NaN	NaN	0.826299	0.675456	0.849151	0.79756	0.788514	0.64392	0.692829	0.817397	0.738056	0.660871			0.234	NaN	NaN	0.733607	0.732231	0.713225	0.791016	0.82035	0.746318	0.745428	0.719417	0.720008	0.600915
0.235	NaN	NaN	0.98083	0.665859	0.795389	0.76223	0.797199	0.670888	0.679741	0.761394	0.744226	0.666257			0.235	NaN	NaN	0.851615	0.741409	0.666505	0.836038	0.837363	0.763571	0.768486	0.719124	0.742502	0.673171
0.236	NaN	NaN	0.890846	0.706191	0.775321	0.724002	0.816444	0.696218	0.691344	0.755581	0.709669	0.60743			0.236	NaN	NaN	0.801979	0.755515	0.685711	0.859998	0.834663	0.79334	0.768272	0.725107	0.734881	0.6266
0.237	NaN	NaN	0.8532	0.754496	0.73157	0.742752	0.811266	0.69582	0.695995	0.753878	0.712532	0.648177			0.237	NaN	NaN	0.821738	0.767834	0.719614	0.840066	0.822973	0.786864	0.769501	0.706449	0.709055	0.667195
0.238	NaN	NaN	0.88027	0.758485	0.731883	0.744356	0.835845	0.697713	0.674501	0.718212	0.716923	0.605046			0.238	NaN	NaN	0.835972	0.807255	0.74314	0.827772	0.833763	0.804664	0.678371	0.825642	0.688569	0.669216
0.239	NaN	NaN	0.765379	0.750092	0.706127	0.773515	0.874394	0.699853	0.722313	0.764686	0.705215	0.778536			0.239	NaN	NaN	0.834592	0.789217	0.859041	0.828243	0.866041	0.777775	0.769809	0.733558	0.724804	0.739059
0.24	NaN	NaN	0.761864	0.790326	0.775492	0.779607	0.863745	0.705097	0.679314	0.795193	0.734211	0.652941			0.24	NaN	NaN	0.861444	0.825592	0.842585	0.843759	0.799721	0.752825	0.770308	0.758365	0.738485	0.670732
0.241	NaN	NaN	0.671103	0.737558	0.804924	0.811106	0.860206	0.689776	0.653835	0.794482	0.718797	0.647983			0.241	NaN	NaN	0.845407	0.789275	0.784336	0.754216	0.809486	0.742759	0.715754	0.729782	0.71119	0.705383
0.242	NaN	NaN	0.649682	0.671314	0.807146	0.884925	0.853111	0.682759	0.668436	0.789621	0.703612	0.648023			0.242	NaN	NaN	0.859947	0.739792	0.764932	0.818526	0.794055	0.735486	0.730329	0.73855	0.760443	0.694907
0.243	NaN	NaN	0.61677	0.676239	0.8433	0.81096	0.823205	0.698542	0.662628	0.79284	0.688259	0.613682			0.243	NaN	NaN	0.896166	0.770364	0.774028	0.807855	0.803593	0.727691	0.742442	0.732736	0.716438	0.652655
0.244	NaN	NaN	0.72663	0.687617	0.846216	0.833694	0.829569	0.679846	0.664032	0.786661	0.680966	0.619597			0.244	NaN	NaN	0.884033	0.731303	0.713737	0.807669	0.809032	0.747752	0.760157	0.756369	0.701614	0.667348
0.245	NaN	NaN	0.797311	0.692157	0.879198	0.773429	0.807297	0.696283	0.671229	0.790881	0.681692	0.606538			0.245	NaN	NaN	0.84708	0.700721	0.714841	0.814616	0.842031	0.7782	0.751906	0.664357	0.727438	0.693439
0.246	NaN	NaN	0.924986	0.75334	0.822454	0.738856	0.815546	0.694477	0.709516	0.738909	0.708791	0.560586			0.246	NaN	NaN	0.846645	0.721379	0.712437	0.824049	0.830089	0.764464	0.725968	0.792419	0.73695	0.673584
0.247	NaN	NaN	0.871443	0.74503	0.752301	0.729678	0.833689	0.698854	0.707051	0.747215	0.708091	0.659086			0.247	NaN	NaN	0.862856	0.745604	0.6819	0.832646	0.854054	0.797932	0.719427	0.697666	0.744683	0.704256
0.248	NaN	NaN	0.951397	0.775024	0.775098	0.706819	0.861445	0.696627	0.702371	0.757979	0.689557	0.575357			0.248	NaN	NaN	0.790448	0.774084	0.703984	0.841608	0.841324	0.78461	0.743775	0.685101	0.719183	0.653162
0.249	NaN	NaN	0.903232	0.812732	0.724856	0.707171	0.904149	0.676383	0.716974	0.732501	0.708057	0.594811			0.249	NaN	NaN	0.744548	0.778435	0.781223	0.897862	0.85587	0.799084	0.83875	0.72605	0.721054	0.630842
0.25	NaN	NaN	0.874199	0.795468	0.711294	0.744078	0.903276	0.676099	0.679126	0.708015	0.707376	0.587459			0.25	NaN	NaN	0.731079	0.789574	0.764503	0.810408	0.826714	0.808223	0.776862	0.71383	0.714673	0.608855
0.251	NaN	NaN	0.848184	0.746856	0.70109	0.799473	0.898618	0.676735	0.646415	0.7563	0.657159	0.561659			0.251	NaN	NaN	0.776667	0.786069	0.752481	0.795362	0.835399	0.766611	0.755126	0.708829	0.719066	0.652444
0.252	NaN	NaN	0.732103	0.74771	0.735552	0.793914	0.873311	0.668297	0.652124	0.777538	0.640204	0.601548			0.252	NaN	NaN	0.832262	0.791027	0.805248	0.832886	0.808793	0.768163	0.797022	0.77274	0.726274	0.670526
0.253	NaN	NaN	0.636808	0.711336	0.758179	0.805657	0.845094	0.659786	0.659043	0.704461	0.631784	0.631129			0.253	NaN	NaN	0.822335	0.679641	0.801283	0.814247	0.782234	0.75068	0.801833	0.786555	0.736679	0.671543
0.254	NaN	NaN	0.684087	0.760444	0.807076	0.817083	0.850234	0.707043	0.637686	0.781442	0.644877	0.619795			0.254	NaN	NaN	0.818737	0.706591	0.820045	0.824142	0.775812	0.742254	0.753586	0.687642	0.754845	0.662385
0.255	NaN	NaN	0.688866	0.694106	0.806939	0.780275	0.808359	0.716381	0.666822	0.785035	0.657664	0.710991			0.255	NaN	NaN	0.816183	0.764752	0.780709	0.779058	0.770957	0.763889	0.770486	0.750054	0.747675	0.670391
0.256	NaN	NaN	0.826217	0.580688	0.815532	0.762346	0.803221	0.700287	0.683467	0.742943	0.668995	0.643929			0.256	NaN	NaN	0.833156	0.779819	0.768863	0.787041	0.800923	0.755184	0.728945	0.725815	0.753192	0.652025
0.257	NaN	NaN	0.748238	0.682916	0.847624	0.710924	0.810514	0.691418	0.705662	0.745536	0.683737	0.636791			0.257	NaN	NaN	0.829341	0.797106	0.748238	0.783134	0.82229	0.787155	0.722275	0.749859	0.791874	0.65155
0.258	NaN	NaN	0.788944	0.699657	0.773984	0.766744	0.835589	0.713799	0.716872	0.735093	0.68923	0.634017			0.258	NaN	NaN	0.776827	0.757203	0.799604	0.806966	0.794093	0.776654	0.736925	0.728942	0.741457	0.66176
0.259	NaN	NaN	0.782082	0.745829	0.79405	0.686527	0.875039	0.681627	0.680401	0.737182	0.653419	0.604005			0.259	NaN	NaN	0.697576	0.728875	0.71319	0.808053	0.816218	0.789354	0.697805	0.714035	0.770336	0.680838
0.26	NaN	NaN	0.915983	0.730549	0.749329	0.693639	0.904293	0.66635	0.659001	0.690507	0.652735	0.602553			0.26	NaN	NaN	0.815152	0.73877	0.684566	0.824108	0.834783	0.793639	0.697945	0.743718	0.75836	0.667959
0.261	NaN	NaN	0.992499	0.745407	0.74457	0.718726	0.888845	0.668158	0.650842	0.72564	0.658663	0.60116			0.261	NaN	NaN	0.849188	0.722445	0.707052	0.825076	0.825188	0.777948	0.754939	0.747366	0.757143	0.653367
0.262	NaN	NaN	0.928627	0.755054	0.742959	0.740881	0.875259	0.626966	0.624784	0.755122	0.688412	0.647652			0.262	NaN	NaN	0.84955	0.687385	0.723116	0.809389	0.807523	0.775336	0.756194	0.744371	0.753715	0.674585
0.263	NaN	NaN	0.828096	0.764324	0.783106	0.659853	0.838715	0.652258	0.621456	0.786676	0.65037	0.724419			0.263	NaN	NaN	0.857986	0.677334	0.754811	0.727613	0.810722	0.764806	0.78953	0.70815	0.730852	0.677677
0.264	NaN	NaN	0.781286	0.727841	0.76834	0.71465	0.821407	0.625719	0.619938	0.780919	0.671118	0.653377			0.264	NaN	NaN	0.881001	0.695634	0.754069	0.759034	0.804954	0.705097	0.699365	0.706548	0.722763	0.651799
0.265	NaN	NaN	0.716827	0.736551	0.790375	0.726946	0.829266	0.6479	0.62748	0.780164	0.687861	0.628306			0.265	NaN	NaN	0.872452	0.729183	0.75133	0.774072	0.787853	0.71197	0.756147	0.712843	0.767643	0.617675
0.266	NaN	NaN	0.705157	0.753725	0.906384	0.816266	0.805429	0.669264	0.645236	0.729104	0.682726	0.559834			0.266	NaN	NaN	0.812975	0.748428	0.829778	0.802643	0.773139	0.709666	0.738226	0.714636	0.752783	0.552804
0.267	NaN	NaN	0.909496	0.762428	0.842022	0.712994	0.815924	0.699172	0.65685	0.728617	0.653503	0.650853			0.267	NaN	NaN	0.779198	0.834887	0.742528	0.77161	0.774122	0.735664	0.75714	0.779397	0.716733	0.66365
0.268	NaN	NaN	0.735023	0.725131	0.82134	0.671915	0.844383	0.704705	0.659202	0.796848	0.709217	0.603387			0.268	NaN	NaN	0.792199	0.76416	0.697461	0.795175	0.779121	0.78076	0.746635	0.762517	0.739015	0.661798
0.269	NaN	NaN	0.752503	0.741142	0.845888	0.652399	0.828524	0.698135	0.594038	0.718793	0.723399	0.578947			0.269	NaN	NaN	0.736911	0.679961	0.722104	0.81099	0.811605	0.770291	0.727858	0.800654	0.74469	0.646742
0.27	NaN	NaN	0.787211	0.714606	0.827221	0.645407	0.848818	0.709455	0.627717	0.742255	0.697262	0.620119			0.27	NaN	NaN	0.761208	0.733396	0.725924	0.833202	0.818665	0.783321	0.751075	0.763103	0.769577	0.639559
0.271	NaN	NaN	0.795032	0.687511	0.803597	0.669567	0.85038	0.701061	0.631504	0.739617	0.665418	0.635382			0.271	NaN	NaN	0.796253	0.699224	0.756467	0.841761	0.825616	0.77011	0.764866	0.763783	0.763169	0.640392
0.272	NaN	NaN	0.874592	0.689709	0.786578	0.669535	0.841307	0.710457	0.671339	0.709978	0.662264	0.677221			0.272	NaN	NaN	0.770032	0.67046	0.711071	0.835445	0.798107	0.763233	0.779594	0.755725	0.734028	0.659221
0.273	NaN	NaN	0.830385	0.770328	0.820629	0.669017	0.839895	0.689711	0.661065	0.747742	0.663379	0.65082			0.273	NaN	NaN	0.779018	0.668607	0.711427	0.832964	0.791607	0.772448	0.747692	0.753658	0.749217	0.6135
0.274	NaN	NaN	0.746214	0.779058	0.828784	0.685512	0.837477	0.691562	0.671951	0.72577	0.68528	0.681276			0.274	NaN	NaN	0.940466	0.613344	0.749074	0.83398	0.802943	0.796686	0.789195	0.732904	0.738635	0.584537
0.275	NaN	NaN	0.784666	0.76827	0.823613	0.853845	0.800747	0.661134	0.626688	0.75278	0.659391	0.663292			0.275	NaN	NaN	0.87872	0.588655	0.781927	0.846382	0.815208	0.779659	0.778411	0.805181	0.762297	0.591568
0.276	NaN	NaN	0.763017	0.695117	0.771345	0.743278	0.822703	0.648368	0.616998	0.770545	0.677624	0.618366			0.276	NaN	NaN	0.847267	0.649218	0.73148	0.821311	0.822992	0.761836	0.804919	0.711151	0.740329	0.614615
0.277	NaN	NaN	0.757277	0.711557	0.757005	0.740087	0.799043	0.658263	0.625289	0.746175	0.648679	0.648084			0.277	NaN	NaN	0.848898	0.720553	0.729813	0.806931	0.815613	0.783372	0.789609	0.745738	0.734339	0.614433
0.278	NaN	NaN	0.904148	0.74978	0.721386	0.7444	0.790538	0.671311	0.60408	0.745719	0.698466	0.663226			0.278	NaN	NaN	0.82221	0.755068	0.686991	0.81553	0.834593	0.765853	0.778806	0.779356	0.76301	0.629225
0.279	NaN	NaN	0.767777	0.653929	0.764611	0.681981	0.816164	0.675152	0.57173	0.743528	0.710072	0.637184			0.279	NaN	NaN	0.798597	0.79641	0.77687	0.839466	0.807965	0.759266	0.772991	0.778532	0.760423	0.629262
0.28	NaN	NaN	0.760795	0.648095	0.80378	0.650462	0.846749	0.683028	0.634633	0.771477	0.696496	0.624994			0.28	NaN	NaN	0.785582	0.835224	0.773276	0.871734	0.811028	0.774349	0.747715	0.729656	0.771876	0.676364
0.281	NaN	NaN	0.782216	0.646152	0.786342	0.654723	0.846957	0.706869	0.628234	0.763788	0.690108	0.630365			0.281	NaN	NaN	0.746143	0.768064	0.74798	0.847765	0.785526	0.799538	0.750103	0.758149	0.731111	0.582862
0.282	NaN	NaN	0.730458	0.622753	0.791074	0.652896	0.871402	0.686042	0.656763	0.770529	0.644207	0.616489			0.282	NaN	NaN	0.718787	0.689418	0.71048	0.820533	0.789692	0.760744	0.807146	0.815286	0.722981	0.608991
0.283	NaN	NaN	0.75011	0.666915	0.734429	0.672951	0.861162	0.722363	0.638056	0.753879	0.672415	0.645417			0.283	NaN	NaN	0.7335	0.597461	0.750354	0.789424	0.780958	0.78129	0.776438	0.749546	0.739962	0.635851
0.284	NaN	NaN	0.757556	0.70982	0.744703	0.854837	0.842922	0.723589	0.647476	0.76781	0.635753	0.642986			0.284	NaN	NaN	0.759475	0.619603	0.753091	0.846024	0.783743	0.799091	0.796056	0.753609	0.742667	0.562558
0.285	NaN	NaN	0.744724	0.67144	0.786396	0.703923	0.820977	0.700067	0.651628	0.721294	0.662932	0.692018			0.285	NaN	NaN	0.804582	0.588788	0.740435	0.801192	0.778809	0.796267	0.757507	0.780797	0.751161	0.592639
0.286	NaN	NaN	0.744785	0.645399	0.826094	0.693079	0.850598	0.67255	0.702613	0.691261	0.649229	0.667606			0.286	NaN	NaN	0.760299	0.617955	0.758105	0.805498	0.819547	0.810791	0.805253	0.749884	0.742762	0.649825
0.287	NaN	NaN	0.799615	0.659526	0.801624	0.704425	0.814175	0.627716	0.638868	0.694259	0.670376	0.651141			0.287	NaN	NaN	0.843773	0.648133	0.71129	0.751754	0.842056	0.768153	0.786107	0.734341	0.747623	0.645455
0.288	NaN	NaN	0.77084	0.750923	0.828915	0.674754	0.820249	0.649428	0.627632	0.740154	0.668121	0.670701			0.288	NaN	NaN	0.875134	0.685366	0.719827	0.754113	0.828692	0.775442	0.778919	0.774655	0.748608	0.585027
0.289	NaN	NaN	0.869767	0.803255	0.824299	0.659997	0.798998	0.604416	0.610717	0.72606	0.663059	0.706894			0.289	NaN	NaN	0.949118	0.767892	0.684011	0.724522	0.838628	0.789234	0.768884	0.827452	0.75011	0.626075
0.29	NaN	NaN	0.67129	0.815548	0.774075	0.705259	0.810464	0.643347	0.62974	0.794519	0.669038	0.655618			0.29	NaN	NaN	0.865089	0.793737	0.717578	0.75688	0.837236	0.753308	0.79101	0.751243	0.709138	0.666265
0.291	NaN	NaN	0.773892	0.790503	0.789537	0.687632	0.828313	0.632253	0.614527	0.775945	0.679785	0.615517			0.291	NaN	NaN	0.820548	0.793324	0.703524	0.76235	0.84222	0.757879	0.762662	0.79623	0.741677	0.630894
0.292	NaN	NaN	0.806462	0.741363	0.813715	0.848832	0.828897	0.652507	0.611185	0.794957	0.670489	0.65452			0.292	NaN	NaN	0.836494	0.765944	0.748848	0.819427	0.801968	0.797127	0.742815	0.803239	0.741128	0.64306
0.293	NaN	NaN	0.822445	0.73746	0.785463	0.670635	0.821615	0.680146	0.611832	0.785583	0.671797	0.6686			0.293	NaN	NaN	0.7565	0.721169	0.700534	0.798601	0.801147	0.794515	0.761359	0.748219	0.773586	0.661297
0.294	NaN	NaN	0.774247	0.676637	0.767865	0.636611	0.856892	0.72179	0.654887	0.776759	0.680193	0.665048			0.294	NaN	NaN	0.703948	0.692394	0.697181	0.787518	0.801285	0.787924	0.752211	0.701805	0.759369	0.679163
0.295	NaN	NaN	0.794574	0.613843	0.71497	0.649538	0.86123	0.747502	0.598511	0.762122	0.632761	0.679227			0.295	NaN	NaN	0.669216	0.647204	0.6644	0.820556	0.774982	0.778539	0.773927	0.718971	0.78155	0.63649
0.296	NaN	NaN	0.801007	0.60598	0.777109	0.661005	0.808233	0.735825	0.678916	0.676696	0.650551	0.68845			0.296	NaN	NaN	0.650742	0.603185	0.736448	0.786991	0.758996	0.790953	0.770929	0.778391	0.782309	0.611806
0.297	NaN	NaN	0.809351	0.633796	0.77515	0.651689	0.839954	0.761817	0.638166	0.68411	0.72929	0.733016			0.297	NaN	NaN	0.717928	0.627505	0.708148	0.820941	0.800372	0.841546	0.745818	0.7936	0.763794	0.632873
0.298	NaN	NaN	0.76308	0.653107	0.783567	0.682057	0.831555	0.706303	0.620948	0.721274	0.667453	0.615483			0.298	NaN	NaN	0.775326	0.628571	0.720243	0.795742	0.806214	0.774283	0.753808	0.736413	0.782748	0.660851
0.299	NaN	NaN	0.732051	0.72541	0.811215	0.719117	0.80122	0.671687	0.594436	0.730812	0.651161	0.679805			0.299	NaN	NaN	0.752415	0.617145	0.711766	0.771667	0.801481	0.786668	0.812195	0.728442	0.768544	0.626388
0.3	NaN	NaN	0.765788	0.764625	0.827097	0.720366	0.776046	0.642288	0.607037	0.766153	0.648309	0.694731			0.3	NaN	NaN	0.84067	0.669398	0.710995	0.818461	0.823391	0.766182	0.789904	0.771206	0.755642	0.619922
0.301	NaN	NaN	0.726449	0.740484	0.849905	0.839499	0.764071	0.62586	0.632221	0.765986	0.617904	0.663337			0.301	NaN	NaN	0.813069	0.664284	0.740011	0.803108	0.836058	0.774093	0.748152	0.773859	0.776487	0.636394
0.302	NaN	NaN	0.706494	0.757486	0.767007	0.664951	0.792542	0.616005	0.651771	0.799361	0.649497	0.650464			0.302	NaN	NaN	0.78773	0.704422	0.668443	0.815444	0.831757	0.773999	0.815191	0.773991	0.747305	0.624198
0.303	NaN	NaN	0.739351	0.710233	0.766515	0.697249	0.778279	0.647619	0.628157	0.775614	0.659889	0.638148			0.303	NaN	NaN	0.787123	0.678424	0.713254	0.790744	0.813881	0.770376	0.779826	0.799965	0.752504	0.630377
0.304	NaN	NaN	0.804176	0.665321	0.758563	0.675451	0.777132	0.626462	0.653341	0.694845	0.690041	0.639354			0.304	NaN	NaN	0.733957	0.696002	0.736928	0.796978	0.796914	0.798135	0.791298	0.828486	0.757508	0.64729
0.305	NaN	NaN	0.862932	0.61965	0.783229	0.714965	0.781461	0.645105	0.67693	0.724613	0.707232	0.684602			0.305	NaN	NaN	0.676072	0.688381	0.768525	0.822202	0.7715	0.811572	0.774557	0.793274	0.758657	0.609663
0.306	NaN	NaN	0.775546	0.65365	0.765499	0.716367	0.781868	0.6904	0.653763	0.70278	0.684042	0.599613			0.306	NaN	NaN	0.60689	0.666178	0.74816	0.78857	0.788486	0.818507	0.764201	0.778614	0.787567	0.684883
0.307	NaN	NaN	0.819526	0.682776	0.735779	0.732953	0.825897	0.734627	0.626286	0.733783	0.692408	0.64809			0.307	NaN	NaN	0.703833	0.656156	0.710992	0.790766	0.778018	0.854737	0.791672	0.7459	0.750963	0.663099
0.308	NaN	NaN	0.800779	0.645112	0.767694	0.701102	0.777541	0.735605	0.64721	0.696538	0.671379	0.64267			0.308	NaN	NaN	0.676404	0.61146	0.705361	0.766529	0.764557	0.794112	0.809019	0.696692	0.760405	0.695526
0.309	NaN	NaN	0.753087	0.679448	0.75235	0.711566	0.795982	0.774088	0.662602	0.719447	0.685126	0.687159			0.309	NaN	NaN	0.668025	0.619337	0.738267	0.752955	0.74834	0.807722	0.79543	0.758216	0.777909	0.646955
0.31	NaN	NaN	0.775628	0.669444	0.786595	0.812964	0.812208	0.762267	0.678364	0.714856	0.634913	0.668384			0.31	NaN	NaN	0.699528	0.615891	0.744296	0.757563	0.759053	0.827994	0.818138	0.770396	0.775874	0.638362
0.311	NaN	NaN	0.742173	0.741759	0.748915	0.689987	0.803606	0.70027	0.630675	0.730516	0.645567	0.639365			0.311	NaN	NaN	0.82221	0.562383	0.713762	0.761908	0.791419	0.842242	0.773613	0.796073	0.761916	0.61113
0.312	NaN	NaN	0.728367	0.796516	0.775896	0.668342	0.79862	0.684094	0.633687	0.753745	0.652594	0.595245			0.312	NaN	NaN	0.776747	0.645652	0.669381	0.757998	0.839558	0.803204	0.829954	0.813722	0.73531	0.672986
0.313	NaN	NaN	0.734607	0.763096	0.749681	0.625232	0.781669	0.69579	0.630962	0.763288	0.654548	0.731296			0.313	NaN	NaN	0.750696	0.611549	0.711194	0.714363	0.824101	0.799925	0.833294	0.791393	0.77167	0.729105
0.314	NaN	NaN	0.819698	0.717876	0.773642	0.638929	0.764552	0.682643	0.591799	0.746335	0.664507	0.635332			0.314	NaN	NaN	0.743375	0.606637	0.690128	0.794599	0.795166	0.812511	0.781406	0.798281	0.796221	0.678352
0.315	NaN	NaN	0.852015	0.65986	0.782085	0.652591	0.777416	0.651268	0.675423	0.774154	0.686851	0.649586			0.315	NaN	NaN	0.738905	0.625561	0.718086	0.793317	0.766458	0.794639	0.832399	0.786685	0.779479	0.645233
0.316	NaN	NaN	0.792798	0.599911	0.778864	0.639257	0.752853	0.676988	0.647058	0.740144	0.670001	0.603943			0.316	NaN	NaN	0.694092	0.623471	0.705458	0.798997	0.773631	0.772723	0.846164	0.781304	0.774683	0.64791
0.317	NaN	NaN	0.7814	0.622848	0.795434	0.651116	0.751756	0.66019	0.624087	0.719519	0.696818	0.640731			0.317	NaN	NaN	0.690591	0.642574	0.683075	0.790353	0.773275	0.781353	0.819386	0.746974	0.812081	0.680427
0.318	NaN	NaN	0.745094	0.592121	0.770533	0.786784	0.780059	0.682002	0.642067	0.766459	0.626074	0.659957			0.318	NaN	NaN	0.712926	0.599388	0.719449	0.791489	0.741605	0.760908	0.762404	0.817983	0.766721	0.602232
0.319	NaN	NaN	0.708712	0.67032	0.759132	0.678654	0.768608	0.675514	0.684311	0.750561	0.661025	0.687868			0.319	NaN	NaN	0.76283	0.674437	0.675664	0.71528	0.757421	0.812094	0.712064	0.769237	0.764735	0.64746
0.32	NaN	NaN	0.680775	0.619787	0.70362	0.685254	0.78451	0.660445	0.605617	0.718231	0.632924	0.631278			0.32	NaN	NaN	0.761941	0.616125	0.707152	0.712688	0.745869	0.789396	0.738116	0.762899	0.750548	0.603641
0.321	NaN	NaN	0.617833	0.608545	0.741882	0.666065	0.795205	0.659198	0.643246	0.726513	0.62765	0.681174			0.321	NaN	NaN	0.723592	0.632448	0.646353	0.734065	0.746553	0.829628	0.770215	0.82132	0.804866	0.641871
0.322	NaN	NaN	0.6516	0.668261	0.714498	0.666699	0.812703	0.674704	0.626965	0.71771	0.651881	0.690139			0.322	NaN	NaN	0.740682	0.581934	0.67948	0.72871	0.803385	0.82624	0.770243	0.773356	0.802734	0.688596
0.323	NaN	NaN	0.669996	0.620335	0.788027	0.673781	0.802603	0.666652	0.610063	0.753322	0.659085	0.652977			0.323	NaN	NaN	0.678601	0.615364	0.647771	0.726105	0.811439	0.85119	0.782205	0.808179	0.78526	0.669022
0.324	NaN	NaN	0.706303	0.681984	0.776124	0.708813	0.803575	0.691939	0.644507	0.750961	0.63237	0.646603			0.324	NaN	NaN	0.723834	0.687504	0.610751	0.724736	0.813	0.82108	0.797799	0.761554	0.808006	0.64754
0.325	NaN	NaN	0.737209	0.72549	0.758435	0.731392	0.813173	0.646389	0.644683	0.764808	0.666904	0.654499			0.325	NaN	NaN	0.707025	0.633384	0.654854	0.75805	0.775969	0.809445	0.799984	0.805091	0.805218	0.669851
0.326	NaN	NaN	0.749392	0.723268	0.695678	0.748302	0.799085	0.663944	0.655403	0.782769	0.695065	0.610583			0.326	NaN	NaN	0.739052	0.630399	0.603933	0.717636	0.774298	0.828076	0.810123	0.871656	0.792921	0.718363
0.327	NaN	NaN	0.765627	0.683515	0.753066	0.685646	0.791924	0.650463	0.633462	0.809904	0.677141	0.654344			0.327	NaN	NaN	0.722593	0.625574	0.668472	0.818357	0.786014	0.778992	0.828273	0.824672	0.796894	0.707184
0.328	NaN	NaN	0.80228	0.663701	0.756653	0.670177	0.760096	0.628227	0.627031	0.782068	0.688444	0.645794			0.328	NaN	NaN	0.682814	0.628348	0.625307	0.749363	0.732137	0.783327	0.820792	0.847346	0.797113	0.724899
0.329	NaN	NaN	0.761634	0.716825	0.721734	0.619309	0.766814	0.672292	0.657573	0.785073	0.656095	0.646604			0.329	NaN	NaN	0.678674	0.631001	0.616555	0.710432	0.726507	0.772096	0.855409	0.80389	0.804605	0.731948
0.33	NaN	NaN	0.706868	0.659652	0.740198	0.683314	0.732575	0.680626	0.640846	0.719152	0.615544	0.709395			0.33	NaN	NaN	0.689851	0.657066	0.63184	0.729139	0.745715	0.773126	0.85815	0.832719	0.800381	0.730379
0.331	NaN	NaN	0.689971	0.642629	0.743108	0.674432	0.717603	0.623138	0.636305	0.684834	0.633763	0.696752			0.331	NaN	NaN	0.699947	0.627432	0.615249	0.735205	0.738388	0.805614	0.816148	0.83009	0.800163	0.719369
0.332	NaN	NaN	0.725471	0.621906	0.704144	0.650667	0.74233	0.671353	0.613554	0.71679	0.640293	0.720728			0.332	NaN	NaN	0.649035	0.584249	0.670436	0.744929	0.744421	0.754742	0.863961	0.77151	0.819193	0.687857
0.333	NaN	NaN	0.77579	0.583605	0.713052	0.631765	0.783535	0.683122	0.635691	0.715923	0.650956	0.707318			0.333	NaN	NaN	0.723761	0.614011	0.635247	0.736792	0.732879	0.744505	0.842131	0.780463	0.82669	0.654446
0.334	NaN	NaN	0.699189	0.576519	0.730548	0.66641	0.81982	0.722085	0.644087	0.72268	0.637305	0.701566			0.334	NaN	NaN	0.672447	0.587177	0.695184	0.762499	0.747457	0.765679	0.836253	0.787844	0.800057	0.748105
0.335	NaN	NaN	0.674329	0.556954	0.776483	0.669332	0.819368	0.696627	0.618009	0.715167	0.603997	0.688327			0.335	NaN	NaN	0.709271	0.60854	0.651386	0.759871	0.761182	0.800689	0.859609	0.779937	0.805683	0.708144
0.336	NaN	NaN	0.675172	0.618483	0.806235	0.774045	0.791971	0.667901	0.618241	0.718682	0.689095	0.677737			0.336	NaN	NaN	0.692694	0.595388	0.629999	0.727927	0.766654	0.776092	0.864263	0.794757	0.823639	0.731617
0.337	NaN	NaN	0.651841	0.629199	0.756729	0.690869	0.824075	0.656363	0.600536	0.732635	0.639037	0.667778			0.337	NaN	NaN	0.653632	0.55296	0.616574	0.721903	0.754578	0.761006	0.838475	0.843596	0.782417	0.699503
0.338	NaN	NaN	0.762005	0.632198	0.769272	0.723057	0.806167	0.678145	0.685531	0.701251	0.615666	0.708816			0.338	NaN	NaN	0.620739	0.542146	0.58328	0.675885	0.74495	0.791598	0.819198	0.905555	0.805052	0.742809
0.339	NaN	NaN	0.779322	0.661456	0.756219	0.673997	0.783943	0.671743	0.597937	0.734782	0.636779	0.71045			0.339	NaN	NaN	0.67889	0.542359	0.603112	0.718561	0.729575	0.76509	0.876463	0.859737	0.808944	0.717797
0.34	NaN	NaN	0.744588	0.746486	0.813743	0.641538	0.78046	0.618248	0.62102	0.742963	0.64917	0.612618			0.34	NaN	NaN	0.66061	0.521209	0.580398	0.708093	0.709453	0.764283	0.837395	0.784388	0.823806	0.694559
0.341	NaN	NaN	0.764818	0.640057	0.756537	0.647223	0.746807	0.662007	0.642373	0.656331	0.608518	0.62947			0.341	NaN	NaN	0.616008	0.564746	0.605797	0.658722	0.716424	0.758405	0.830512	0.858651	0.815206	0.675389
0.342	NaN	NaN	0.77115	0.576964	0.711531	0.617536	0.74921	0.640758	0.644741	0.664704	0.640257	0.635949			0.342	NaN	NaN	0.636899	0.55135	0.611952	0.652602	0.716008	0.776581	0.828585	0.847805	0.830966	0.703297
0.343	NaN	NaN	0.799962	0.601098	0.697348	0.63888	0.754216	0.642839	0.678676	0.684683	0.627491	0.69938			0.343	NaN	NaN	0.700686	0.584541	0.594943	0.653229	0.716695	0.78037	0.825085	0.864553	0.825095	0.643672
0.344	NaN	NaN	0.717624	0.624275	0.741629	0.657337	0.731092	0.660963	0.627481	0.693284	0.613809	0.700912			0.344	NaN	NaN	0.61895	0.593323	0.669884	0.742771	0.710142	0.827354	0.861534	0.85168	0.847001	0.698187
0.345	NaN	NaN	0.693122	0.615511	0.675813	0.6226	0.760408	0.618116	0.604446	0.690196	0.636618	0.66829			0.345	NaN	NaN	0.68342	0.586104	0.649794	0.709833	0.709146	0.795178	0.851773	0.776548	0.853531	0.728604
0.346	NaN	NaN	0.667769	0.553969	0.681353	0.648192	0.773524	0.634093	0.603217	0.71353	0.672067	0.646971			0.346	NaN	NaN	0.67076	0.615473	0.517833	0.720606	0.723647	0.763397	0.810992	0.809669	0.807634	0.784711
0.347	NaN	NaN	0.623659	0.544516	0.696867	0.676892	0.761991	0.65584	0.644188	0.700151	0.64051	0.725022			0.347	NaN	NaN	0.669124	0.538016	0.607236	0.703419	0.730717	0.746291	0.835212	0.793063	0.823692	0.794846
0.348	NaN	NaN	0.624444	0.598584	0.683958	0.714911	0.751588	0.66701	0.650442	0.664963	0.634743	0.657708			0.348	NaN	NaN	0.665393	0.538192	0.584555	0.698863	0.715404	0.717698	0.828241	0.80672	0.81956	0.718645
0.349	NaN	NaN	0.666985	0.661423	0.681049	0.710902	0.752118	0.688221	0.628179	0.701312	0.612135	0.699987			0.349	NaN	NaN	0.702435	0.552153	0.593592	0.704235	0.715648	0.667347	0.840371	0.793393	0.79978	0.732668
0.35	NaN	NaN	0.678053	0.643782	0.685476	0.730538	0.79691	0.680325	0.588306	0.696092	0.621661	0.711276			0.35	NaN	NaN	0.654766	0.457746	0.568456	0.673797	0.661132	0.652607	0.826071	0.837926	0.809776	0.730998
0.351	NaN	NaN	0.714596	0.633093	0.704211	0.715611	0.749365	0.66487	0.605575	0.748653	0.643913	0.678426			0.351	NaN	NaN	0.633339	0.551643	0.591679	0.669638	0.692433	0.691275	0.797479	0.901378	0.831197	0.753924
0.352	NaN	NaN	0.806252	0.639628	0.749706	0.668888	0.774328	0.672138	0.616893	0.678391	0.61824	0.685499			0.352	NaN	NaN	0.607679	0.512773	0.546901	0.649023	0.685855	0.664003	0.819541	0.863236	0.85414	0.761589
0.353	NaN	NaN	0.751953	0.60538	0.734276	0.780793	0.779157	0.6652	0.598553	0.652889	0.643143	0.690475			0.353	NaN	NaN	0.550687	0.477429	0.62385	0.665075	0.682681	0.715535	0.839802	0.861335	0.853924	0.727232
0.354	NaN	NaN	0.783292	0.599733	0.714204	0.666873	0.80507	0.630228	0.642161	0.686049	0.652283	0.698935			0.354	NaN	NaN	0.627618	0.544861	0.574634	0.643396	0.654237	0.742991	0.8167	0.851172	0.869332	0.744717
0.355	NaN	NaN	0.761129	0.562509	0.719377	0.647808	0.767358	0.629291	0.637076	0.636325	0.677579	0.785128			0.355	NaN	NaN	0.635273	0.522418	0.564081	0.640562	0.684636	0.747902	0.838593	0.796939	0.843502	0.716962
0.356	NaN	NaN	0.756798	0.529126	0.701358	0.664109	0.780531	0.660106	0.65215	0.691183	0.618411	0.654936			0.356	NaN	NaN	0.604518	0.523102	0.618372	0.659158	0.667913	0.749341	0.848647	0.839641	0.833992	0.74803
0.357	NaN	NaN	0.663993	0.613893	0.674027	0.705629	0.779586	0.667531	0.58567	0.664086	0.650158	0.710999			0.357	NaN	NaN	0.625424	0.583058	0.677828	0.673236	0.680616	0.728702	0.827782	0.813571	0.851862	0.733257
0.358	NaN	NaN	0.654768	0.585991	0.646079	0.681562	0.76844	0.680833	0.5983	0.717098	0.61604	0.660488			0.358	NaN	NaN	0.638007	0.612378	0.546715	0.653067	0.661782	0.725186	0.802477	0.773912	0.84969	0.718853
0.359	NaN	NaN	0.658049	0.629435	0.625865	0.704631	0.78954	0.712441	0.577871	0.670031	0.638486	0.634539			0.359	NaN	NaN	0.614727	0.604319	0.545787	0.641437	0.675635	0.744038	0.791111	0.772316	0.867679	0.721427
0.36	NaN	NaN	0.641886	0.729989	0.673983	0.683009	0.758417	0.708489	0.617694	0.691907	0.632171	0.677265			0.36	NaN	NaN	0.587345	0.531021	0.565941	0.629257	0.657678	0.72378	0.841246	0.753529	0.817882	0.762702
0.361	NaN	NaN	0.589912	0.639887	0.669362	0.664183	0.751846	0.677189	0.595701	0.681241	0.628171	0.651532			0.361	NaN	NaN	0.573608	0.554131	0.565477	0.658119	0.66918	0.741121	0.844455	0.784286	0.806556	0.751581
0.362	NaN	NaN	0.652401	0.662046	0.672227	0.703089	0.701559	0.695738	0.59899	0.682586	0.655295	0.679014			0.362	NaN	NaN	0.602843	0.508477	0.608463	0.67267	0.600122	0.776313	0.840972	0.767613	0.804227	0.687547
0.363	NaN	NaN	0.642352	0.597307	0.681721	0.629849	0.708581	0.702078	0.61399	0.664474	0.622785	0.798142			0.363	NaN	NaN	0.589494	0.527849	0.564268	0.471523	0.618467	0.763542	0.810544	0.788083	0.808435	0.702122
0.364	NaN	NaN	0.667587	0.619083	0.702452	0.679286	0.728616	0.662033	0.615069	0.646059	0.606638	0.660855			0.364	NaN	NaN	0.587206	0.463891	0.550519	0.669476	0.61345	0.699166	0.825913	0.753702	0.802172	0.757081
0.365	NaN	NaN	0.692441	0.592871	0.735382	0.691738	0.794418	0.641938	0.600321	0.631805	0.650413	0.672258			0.365	NaN	NaN	0.660691	0.4808	0.447553	0.67789	0.654386	0.696566	0.81401	0.807408	0.843901	0.736858
0.366	NaN	NaN	0.693318	0.570098	0.703023	0.671697	0.777297	0.667518	0.656376	0.701371	0.650523	0.687601			0.366	NaN	NaN	0.556042	0.473256	0.520486	0.667357	0.645867	0.719084	0.802088	0.887078	0.84057	0.773672
0.367	NaN	NaN	0.692953	0.585293	0.691535	0.642533	0.78121	0.625414	0.667137	0.668277	0.659713	0.671028			0.367	NaN	NaN	0.543962	0.472385	0.521723	0.632176	0.633811	0.692746	0.738814	0.81538	0.831158	0.742011
0.368	NaN	NaN	0.716563	0.597777	0.638772	0.66767	0.777213	0.662036	0.660664	0.6822	0.670579	0.645504			0.368	NaN	NaN	0.591021	0.486736	0.531355	0.613808	0.594756	0.688283	0.80537	0.815033	0.813252	0.709633
0.369	NaN	NaN	0.7158	0.540911	0.651333	0.671422	0.790584	0.679977	0.649876	0.695057	0.711617	0.636908			0.369	NaN	NaN	0.579528	0.425039	0.574104	0.596809	0.625718	0.691816	0.792627	0.800021	0.800876	0.715346
0.37	NaN	NaN	0.720311	0.573222	0.656187	0.684421	0.791774	0.69801	0.573333	0.656757	0.630212	0.671232			0.37	NaN	NaN	0.544453	0.509033	0.61192	0.593549	0.644865	0.695555	0.78572	0.76995	0.803744	0.670095
0.371	NaN	NaN	0.727607	0.633876	0.662466	0.764418	0.78653	0.732501	0.596428	0.678564	0.645221	0.645384			0.371	NaN	NaN	0.533235	0.450136	0.555204	0.733926	0.599357	0.70834	0.779226	0.781853	0.82487	0.67816
0.372	NaN	NaN	0.7137	0.556978	0.610616	0.727504	0.76114	0.724468	0.565684	0.644469	0.631004	0.697151			0.372	NaN	NaN	0.572589	0.439581	0.553593	0.582439	0.617646	0.709274	0.786362	0.775148	0.818693	0.756209
0.373	NaN	NaN	0.695502	0.507751	0.589931	0.7237	0.761397	0.695712	0.578288	0.728914	0.66542	0.669741			0.373	NaN	NaN	0.568483	0.477144	0.546605	0.561775	0.605178	0.703532	0.754775	0.818942	0.806876	0.71816
0.374	NaN	NaN	0.629255	0.504525	0.613612	0.74857	0.763208	0.674612	0.62139	0.692459	0.649388	0.706678			0.374	NaN	NaN	0.507642	0.480006	0.499536	0.553004	0.576727	0.704406	0.769219	0.807422	0.788581	0.739602
0.375	NaN	NaN	0.609132	0.538767	0.605706	0.751838	0.735052	0.676323	0.63407	0.684758	0.641416	0.707635			0.375	NaN	NaN	0.571085	0.461706	0.454492	0.555946	0.607916	0.676542	0.789705	0.801016	0.824392	0.74503
0.376	NaN	NaN	0.572418	0.551108	0.612603	0.704879	0.732834	0.684544	0.66505	0.689252	0.659142	0.640127			0.376	NaN	NaN	0.646077	0.442827	0.464772	0.537627	0.579994	0.640554	0.748334	0.811722	0.798239	0.72316
0.377	NaN	NaN	0.699787	0.547782	0.633778	0.653973	0.719399	0.664636	0.661502	0.676534	0.669225	0.712336			0.377	NaN	NaN	0.552368	0.423155	0.477881	0.552759	0.609739	0.662752	0.700672	0.75185	0.792861	0.731103
0.378	NaN	NaN	0.685277	0.574679	0.645414	0.625193	0.750995	0.680545	0.667967	0.67551	0.686578	0.732835			0.378	NaN	NaN	0.563909	0.455551	0.460184	0.544993	0.598016	0.689545	0.745315	0.759609	0.825689	0.706103
0.379	NaN	NaN	0.644194	0.588981	0.624771	0.669453	0.757267	0.702325	0.676866	0.68888	0.691572	0.738243			0.379	NaN	NaN	0.551934	0.473966	0.540768	0.557361	0.569678	0.703263	0.74778	0.780791	0.845213	0.686258
0.38	NaN	NaN	0.652859	0.55196	0.671459	0.592351	0.75522	0.71364	0.592894	0.6925	0.717118	0.722659			0.38	NaN	NaN	0.520704	0.492418	0.537756	0.503657	0.573802	0.729445	0.800998	0.727784	0.777482	0.744607
0.381	NaN	NaN	0.644369	0.601338	0.619675	0.607579	0.762746	0.740664	0.624412	0.689186	0.677488	0.687741			0.381	NaN	NaN	0.553836	0.447354	0.515072	0.533121	0.550913	0.682309	0.724599	0.810192	0.753558	0.729722
0.382	NaN	NaN	0.705608	0.528939	0.651344	0.634334	0.759732	0.732293	0.58511	0.690744	0.670994	0.746226			0.382	NaN	NaN	0.553465	0.488432	0.615237	0.565507	0.55842	0.667323	0.759276	0.808777	0.754988	0.771568
0.383	NaN	NaN	0.656868	0.565524	0.627167	0.64603	0.758238	0.741501	0.644531	0.739053	0.711004	0.749219			0.383	NaN	NaN	0.540868	0.432824	0.492761	0.522193	0.529769	0.636035	0.73889	0.74716	0.787192	0.757983
0.384	NaN	NaN	0.597322	0.490471	0.579842	0.618535	0.74128	0.706701	0.636449	0.692608	0.70462	0.730652			0.384	NaN	NaN	0.424398	0.439967	0.439081	0.541369	0.559043	0.617457	0.713479	0.738109	0.820263	0.790585
0.385	NaN	NaN	0.691045	0.505897	0.581634	0.657132	0.750564	0.697303	0.64128	0.723504	0.69396	0.770511			0.385	NaN	NaN	0.515864	0.468761	0.472552	0.527513	0.560625	0.60966	0.689737	0.755992	0.789209	0.781035
0.386	NaN	NaN	0.650662	0.516998	0.595158	0.660508	0.768502	0.695454	0.671159	0.7219	0.691509	0.726937			0.386	NaN	NaN	0.509272	0.415639	0.441617	0.502654	0.552905	0.616893	0.712496	0.726951	0.774605	0.75811
0.387	NaN	NaN	0.542759	0.507735	0.578388	0.678648	0.770752	0.677941	0.656992	0.722231	0.687115	0.745379			0.387	NaN	NaN	0.587623	0.425159	0.450562	0.473897	0.496529	0.627386	0.68956	0.723902	0.781975	0.747811
0.388	NaN	NaN	0.605193	0.463948	0.577877	0.754632	0.727037	0.689522	0.654605	0.753244	0.700779	0.812427			0.388	NaN	NaN	0.470782	0.396177	0.466203	0.526353	0.506101	0.603155	0.710785	0.754285	0.758508	0.688978
0.389	NaN	NaN	0.564929	0.535063	0.584345	0.655504	0.737956	0.700027	0.62866	0.740097	0.660137	0.699626			0.389	NaN	NaN	0.479701	0.428865	0.434538	0.459338	0.560528	0.599334	0.727517	0.717027	0.743941	0.707556
0.39	NaN	NaN	0.569081	0.563049	0.658329	0.632197	0.767685	0.720592	0.635116	0.732931	0.657614	0.689421			0.39	NaN	NaN	0.506571	0.452201	0.339026	0.461388	0.525465	0.591092	0.756481	0.733431	0.697746	0.73297
0.391	NaN	NaN	0.556435	0.560969	0.593284	0.605138	0.76523	0.701244	0.614672	0.718071	0.68172	0.674867			0.391	NaN	NaN	0.489731	0.493132	0.455172	0.488482	0.529314	0.62089	0.703547	0.702759	0.685806	0.754767
0.392	NaN	NaN	0.606549	0.592048	0.629378	0.575473	0.757224	0.738097	0.592826	0.701434	0.67114	0.709093			0.392	NaN	NaN	0.484417	0.424916	0.466382	0.491948	0.52941	0.601863	0.676653	0.710651	0.70476	0.767476
0.393	NaN	NaN	0.57617	0.544919	0.598911	0.552565	0.757949	0.701169	0.6268	0.685997	0.707865	0.780543			0.393	NaN	NaN	0.443068	0.445888	0.455136	0.493235	0.464481	0.628392	0.687822	0.68714	0.658798	0.776272
0.394	NaN	NaN	0.658721	0.525893	0.615739	0.599436	0.767213	0.70816	0.649999	0.705631	0.741488	0.742398			0.394	NaN	NaN	0.443331	0.466815	0.450134	0.46204	0.503623	0.590904	0.751768	0.669992	0.697261	0.774278
0.395	NaN	NaN	0.669964	0.530059	0.616567	0.610539	0.73103	0.711237	0.74628	0.762481	0.681667	0.771467			0.395	NaN	NaN	0.438555	0.430833	0.520305	0.457301	0.49449	0.585853	0.709889	0.630315	0.70287	0.739419
0.396	NaN	NaN	0.647232	0.50136	0.557018	0.642132	0.732451	0.745182	0.68135	0.76652	0.704018	0.702114			0.396	NaN	NaN	0.41	0.406296	0.454924	0.452645	0.51713	0.540406	0.736561	0.674779	0.728035	0.78062
0.397	NaN	NaN	0.622981	0.479194	0.568066	0.719347	0.748027	0.774143	0.693256	0.768569	0.700974	0.731782			0.397	NaN	NaN	0.370266	0.421222	0.459	0.505243	0.494166	0.547651	0.720907	0.64993	0.711289	0.683063
0.398	NaN	NaN	0.511573	0.501969	0.586493	0.664576	0.77355	0.763931	0.688035	0.761687	0.685847	0.737665			0.398	NaN	NaN	0.471483	0.385341	0.450146	0.371276	0.480793	0.530984	0.726547	0.654734	0.65317	0.698106
0.399	NaN	NaN	0.627292	0.481122	0.540115	0.681894	0.763681	0.802871	0.705746	0.70476	0.673344	0.712087			0.399	NaN	NaN	0.287859	0.418866	0.421157	0.445816	0.457968	0.515766	0.684114	0.642478	0.712943	0.765313
0.4	NaN	NaN	0.552767	0.544818	0.565068	0.63294	0.772188	0.759047	0.705697	0.789225	0.698241	0.739281			0.4	NaN	NaN	0.387743	0.420717	0.458636	0.456307	0.48416	0.558759	0.689313	0.687012	0.666293	0.788945
0.401	NaN	NaN	0.556251	0.521349	0.547624	0.571423	0.781307	0.79257	0.683977	0.76849	0.737974	0.728789			0.401	NaN	NaN	0.443473	0.41003	0.457354	0.442141	0.471516	0.548764	0.719743	0.639965	0.664354	0.753377
0.402	NaN	NaN	0.52793	0.501802	0.580569	0.580425	0.774296	0.78081	0.670324	0.750421	0.728079	0.725965			0.402	NaN	NaN	0.419437	0.335802	0.40583	0.436795	0.474493	0.588852	0.682552	0.653695	0.645431	0.729628
0.403	NaN	NaN	0.515042	0.526212	0.587647	0.585203	0.760722	0.760039	0.652361	0.793851	0.715231	0.699326			0.403	NaN	NaN	0.437006	0.383248	0.388087	0.42366	0.468061	0.557575	0.68673	0.671882	0.657121	0.699944
0.404	NaN	NaN	0.540668	0.508913	0.592197	0.601759	0.76773	0.762067	0.672103	0.744419	0.752032	0.704441			0.404	NaN	NaN	0.410803	0.392976	0.394064	0.43072	0.456275	0.586542	0.642477	0.619022	0.64503	0.753216
0.405	NaN	NaN	0.505348	0.469464	0.559317	0.623864	0.707856	0.764239	0.710433	0.732525	0.72623	0.651196			0.405	NaN	NaN	0.426729	0.417626	0.458708	0.46405	0.435999	0.567125	0.630314	0.577082	0.633768	0.738458
0.406	NaN	NaN	0.557284	0.445785	0.549948	0.606383	0.730043	0.727353	0.690616	0.716556	0.739082	0.724104			0.406	NaN	NaN	0.405916	0.368876	0.395369	0.43643	0.468321	0.585163	0.648094	0.590535	0.616952	0.749331
0.407	NaN	NaN	0.602492	0.529399	0.518627	0.637463	0.751031	0.73339	0.736552	0.844627	0.699467	0.715553			0.407	NaN	NaN	0.38858	0.473242	0.467602	0.419132	0.475566	0.581754	0.610063	0.619474	0.621181	0.7571
0.408	NaN	NaN	0.533877	0.493979	0.54374	0.649684	0.728084	0.768089	0.694305	0.762575	0.723297	0.743587			0.408	NaN	NaN	0.338002	0.371763	0.423542	0.446865	0.473877	0.559033	0.687602	0.567115	0.603654	0.761968
0.409	NaN	NaN	0.506086	0.446262	0.52353	0.684741	0.743249	0.794279	0.727249	0.809691	0.718071	0.697666			0.409	NaN	NaN	0.397645	0.370364	0.403363	0.397323	0.461375	0.510119	0.56857	0.598028	0.610506	0.697519
0.41	NaN	NaN	0.520301	0.463463	0.509062	0.643436	0.757509	0.815303	0.663421	0.807423	0.719677	0.712084			0.41	NaN	NaN	0.322195	0.383525	0.41324	0.40325	0.435104	0.498622	0.608889	0.593297	0.598505	0.704919
0.411	NaN	NaN	0.562396	0.473633	0.504016	0.607862	0.717077	0.815077	0.69429	0.83805	0.70423	0.708532			0.411	NaN	NaN	0.323719	0.376184	0.365173	0.367025	0.402187	0.503143	0.599395	0.571564	0.619021	0.664174
0.412	NaN	NaN	0.574253	0.523924	0.482351	0.605661	0.781554	0.797704	0.720188	0.810354	0.706945	0.64065			0.412	NaN	NaN	0.341281	0.343808	0.386566	0.36127	0.425997	0.475024	0.635736	0.532357	0.608951	0.698028
0.413	NaN	NaN	0.48592	0.479911	0.504307	0.61516	0.765111	0.820091	0.669703	0.771444	0.718041	0.661307			0.413	NaN	NaN	0.334509	0.39791	0.401871	0.392191	0.390023	0.464039	0.605831	0.542215	0.600519	0.694665
0.414	NaN	NaN	0.444737	0.416064	0.483149	0.688917	0.738352	0.801712	0.660134	0.816774	0.802378	0.675195			0.414	NaN	NaN	0.352307	0.406241	0.425303	0.60783	0.412283	0.477223	0.604353	0.556696	0.607725	0.609784
0.415	NaN	NaN	0.411765	0.437443	0.499478	0.581747	0.689872	0.796992	0.686727	0.76242	0.751608	0.683516			0.415	NaN	NaN	0.334534	0.384695	0.378995	0.404358	0.415494	0.503007	0.593279	0.533764	0.568115	0.714035
0.416	NaN	NaN	0.441633	0.411742	0.515444	0.605162	0.67261	0.749536	0.692632	0.779328	0.785625	0.657026			0.416	NaN	NaN	0.396349	0.375269	0.36768	0.418107	0.431246	0.442211	0.585446	0.531949	0.593248	0.624648
0.417	NaN	NaN	0.488669	0.414696	0.532208	0.583384	0.692462	0.740945	0.722157	0.771516	0.761997	0.582672			0.417	NaN	NaN	0.375328	0.376029	0.383417	0.386671	0.447849	0.499221	0.555769	0.511976	0.584381	0.683872
0.418	NaN	NaN	0.543443	0.441563	0.498528	0.549666	0.680549	0.761544	0.767714	0.856219	0.755982	0.667603			0.418	NaN	NaN	0.320003	0.350314	0.393153	0.394454	0.385434	0.454961	0.534536	0.527927	0.604081	0.644452
0.419	NaN	NaN	0.554081	0.444966	0.481627	0.579578	0.720854	0.678296	0.765753	0.769122	0.731209	0.67477			0.419	NaN	NaN	0.36688	0.317354	0.385923	0.406978	0.423616	0.487218	0.563803	0.541378	0.58075	0.657009
0.42	NaN	NaN	0.556121	0.423739	0.4615	0.583391	0.742966	0.746466	0.774746	0.810202	0.763476	0.653052			0.42	NaN	NaN	0.316357	0.330865	0.397022	0.359575	0.434711	0.470967	0.517951	0.51253	0.551741	0.701087
0.421	NaN	NaN	0.554766	0.423188	0.490838	0.603289	0.759399	0.786204	0.710692	0.748922	0.699944	0.685978			0.421	NaN	NaN	0.350221	0.329399	0.371891	0.374757	0.409626	0.409874	0.519543	0.541928	0.537513	0.644057
0.422	NaN	NaN	0.536167	0.475153	0.517709	0.582032	0.739621	0.768418	0.707881	0.798515	0.758837	0.688709			0.422	NaN	NaN	0.328118	0.32183	0.270781	0.342044	0.394376	0.417589	0.543803	0.495765	0.551184	0.685467
0.423	NaN	NaN	0.485896	0.461237	0.563909	0.570348	0.758974	0.738656	0.689348	0.823494	0.786165	0.646132			0.423	NaN	NaN	0.291796	0.362911	0.35939	0.401248	0.371496	0.422193	0.501637	0.531078	0.536271	0.648003
0.424	NaN	NaN	0.477745	0.449977	0.497562	0.579843	0.71934	0.73322	0.687658	0.770506	0.75686	0.634941			0.424	NaN	NaN	0.290757	0.355647	0.315775	0.32539	0.356385	0.425983	0.503606	0.50401	0.515517	0.655068
0.425	NaN	NaN	0.444378	0.462113	0.472404	0.599398	0.690115	0.774111	0.684035	0.772736	0.762321	0.652152			0.425	NaN	NaN	0.278272	0.377551	0.33301	0.336166	0.355411	0.419134	0.530606	0.479673	0.541426	0.67192
0.426	NaN	NaN	0.44295	0.451059	0.479547	0.581643	0.63898	0.789588	0.735908	0.789447	0.75546	0.658728			0.426	NaN	NaN	0.32656	0.355144	0.315951	0.367918	0.359726	0.434179	0.521957	0.539412	0.517598	0.66155
0.427	NaN	NaN	0.396264	0.445303	0.459704	0.540476	0.674618	0.790237	0.819541	0.836015	0.745082	0.638611			0.427	NaN	NaN	0.31825	0.391768	0.339198	0.323152	0.345148	0.431958	0.559592	0.464899	0.488014	0.689742
0.428	NaN	NaN	0.402069	0.40914	0.489588	0.534318	0.685876	0.749984	0.759879	0.801027	0.769143	0.69336			0.428	NaN	NaN	0.305229	0.365451	0.343313	0.350725	0.344941	0.466633	0.506072	0.460719	0.524915	0.673084
0.429	NaN	NaN	0.395989	0.387117	0.477726	0.544414	0.6953	0.751651	0.779227	0.850623	0.723515	0.666841			0.429	NaN	NaN	0.322902	0.379598	0.32899	0.347056	0.375687	0.403985	0.487878	0.375493	0.519604	0.622407
0.43	NaN	NaN	0.401552	0.341648	0.476291	0.563297	0.675109	0.74403	0.751448	0.886989	0.712982	0.672378			0.43	NaN	NaN	0.39303	0.378028	0.336536	0.346709	0.350322	0.408161	0.495875	0.428245	0.55239	0.685451
0.431	NaN	NaN	0.450343	0.35787	0.456611	0.56877	0.690922	0.719307	0.786896	0.862799	0.72289	0.616918			0.431	NaN	NaN	0.311813	0.377973	0.368743	0.358752	0.374544	0.432409	0.48493	0.428559	0.509623	0.613886
0.432	NaN	NaN	0.42991	0.374937	0.396565	0.490999	0.69449	0.716744	0.83619	0.837788	0.724558	0.611003			0.432	NaN	NaN	0.332698	0.344985	0.334561	0.262173	0.375632	0.388292	0.43651	0.401055	0.472771	0.603405
0.433	NaN	NaN	0.503137	0.380937	0.485922	0.523169	0.709946	0.7317	0.720841	0.800653	0.767234	0.659399			0.433	NaN	NaN	0.304884	0.322291	0.352615	0.33378	0.368503	0.373005	0.474929	0.477658	0.491867	0.621068
0.434	NaN	NaN	0.435654	0.392718	0.455545	0.508603	0.653197	0.692766	0.692373	0.792967	0.684968	0.669885			0.434	NaN	NaN	0.2875	0.368043	0.311616	0.326662	0.344473	0.357379	0.522487	0.362501	0.486129	0.623162
0.435	NaN	NaN	0.455609	0.40527	0.455093	0.490516	0.664764	0.702198	0.692268	0.781787	0.696401	0.674201			0.435	NaN	NaN	0.251781	0.354286	0.294349	0.307629	0.343381	0.363583	0.472541	0.418565	0.465543	0.597683
0.436	NaN	NaN	0.418882	0.397339	0.421789	0.51369	0.609152	0.74669	0.73314	0.772659	0.714697	0.724781			0.436	NaN	NaN	0.224162	0.348862	0.313364	0.294788	0.318571	0.342811	0.459316	0.403711	0.488133	0.571207
0.437	NaN	NaN	0.385871	0.383802	0.415542	0.498695	0.656251	0.695777	0.69339	0.734564	0.708851	0.6744			0.437	NaN	NaN	0.282849	0.352287	0.284713	0.308932	0.325194	0.338028	0.527281	0.305245	0.474029	0.611967
0.438	NaN	NaN	0.348028	0.448523	0.421099	0.531013	0.645717	0.74138	0.714634	0.742903	0.682515	0.669484			0.438	NaN	NaN	0.251452	0.363519	0.270145	0.258855	0.305679	0.363584	0.470344	0.372427	0.44304	0.691466
0.439	NaN	NaN	0.3542	0.469622	0.393154	0.506329	0.638365	0.742672	0.725581	0.747555	0.703227	0.681979			0.439	NaN	NaN	0.272539	0.384284	0.313542	0.274607	0.313282	0.387278	0.458357	0.385308	0.481819	0.646253
0.44	NaN	NaN	0.350258	0.461474	0.364968	0.494649	0.659023	0.747747	0.694368	0.741622	0.660826	0.685277			0.44	NaN	NaN	0.239951	0.374989	0.318989	0.332506	0.316407	0.385044	0.45192	0.350969	0.453498	0.624333
0.441	NaN	NaN	0.418221	0.469362	0.439971	0.464119	0.6685	0.71116	0.717517	0.793251	0.679667	0.685707			0.441	NaN	NaN	0.252138	0.34846	0.28653	0.280845	0.321701	0.361242	0.439193	0.408449	0.454484	0.598675
0.442	NaN	NaN	0.366124	0.406787	0.413492	0.479677	0.658037	0.69038	0.716826	0.813305	0.648439	0.683317			0.442	NaN	NaN	0.25452	0.339532	0.276132	0.298977	0.302051	0.357634	0.412241	0.374998	0.464425	0.613544
0.443	NaN	NaN	0.366295	0.404568	0.437048	0.511956	0.649973	0.65108	0.710559	0.712869	0.691265	0.634752			0.443	NaN	NaN	0.271903	0.283206	0.264112	0.285286	0.33693	0.361805	0.419299	0.403204	0.467447	0.568687
0.444	NaN	NaN	0.364284	0.425581	0.403483	0.507636	0.641633	0.646617	0.689135	0.78142	0.649983	0.652964			0.444	NaN	NaN	0.276849	0.418982	0.280462	0.298659	0.317189	0.336681	0.415978	0.35283	0.418079	0.578503
0.445	NaN	NaN	0.364207	0.36346	0.341309	0.469692	0.59182	0.636276	0.743866	0.74366	0.652919	0.660033			0.445	NaN	NaN	0.235979	0.330005	0.26734	0.299461	0.325001	0.35658	0.371064	0.372279	0.423035	0.617308
0.446	NaN	NaN	0.3751	0.324871	0.376582	0.457933	0.588771	0.633953	0.696096	0.71144	0.642896	0.71239			0.446	NaN	NaN	0.186665	0.334738	0.275924	0.313178	0.320606	0.331936	0.417975	0.349233	0.402934	0.542665
0.447	NaN	NaN	0.377991	0.320032	0.38666	0.431598	0.566368	0.65233	0.633483	0.69966	0.659456	0.707257			0.447	NaN	NaN	0.255336	0.347046	0.244311	0.307047	0.285409	0.334298	0.404827	0.365025	0.408444	0.589214
0.448	NaN	NaN	0.383851	0.347291	0.370939	0.443036	0.580392	0.638727	0.679378	0.666469	0.676606	0.654959			0.448	NaN	NaN	0.277522	0.302955	0.301799	0.28739	0.292413	0.316233	0.413328	0.404029	0.404245	0.563904
0.449	NaN	NaN	0.343704	0.38816	0.338498	0.445322	0.593718	0.645098	0.702318	0.752143	0.649182	0.67033			0.449	NaN	NaN	0.275235	0.369439	0.271707	0.336498	0.270635	0.291023	0.428222	0.363582	0.411566	0.543098
0.45	NaN	NaN	0.350691	0.386968	0.352671	0.401519	0.601418	0.634445	0.669679	0.658409	0.599009	0.642628			0.45	NaN	NaN	0.267001	0.337032	0.238441	0.275217	0.276065	0.303604	0.410228	0.385172	0.407189	0.534174
0.451	NaN	NaN	0.331003	0.413439	0.36605	0.390214	0.58906	0.618605	0.575431	0.679093	0.622566	0.616525			0.451	NaN	NaN	0.229439	0.321684	0.254473	0.28223	0.268351	0.323518	0.473685	0.279334	0.453818	0.502072
0.452	NaN	NaN	0.309867	0.415958	0.372795	0.388915	0.617602	0.621855	0.661157	0.657096	0.663396	0.598552			0.452	NaN	NaN	0.316116	0.356284	0.261217	0.261404	0.274586	0.316031	0.403548	0.361056	0.425023	0.528569
0.453	NaN	NaN	0.34415	0.400005	0.36102	0.41469	0.630705	0.613562	0.653751	0.661461	0.586736	0.641812			0.453	NaN	NaN	0.248073	0.299281	0.231618	0.281172	0.273684	0.32016	0.374111	0.364845	0.380734	0.551908
0.454	NaN	NaN	0.341916	0.353665	0.387665	0.42903	0.602356	0.578335	0.640803	0.681131	0.592078	0.636303			0.454	NaN	NaN	0.235447	0.302319	0.234863	0.27084	0.274591	0.33132	0.354223	0.318435	0.386969	0.516559
0.455	NaN	NaN	0.328514	0.329025	0.341656	0.415616	0.577003	0.580837	0.616724	0.666114	0.525203	0.677879			0.455	NaN	NaN	0.229478	0.320118	0.242306	0.266714	0.270008	0.318552	0.373991	0.315268	0.351605	0.526252
0.456	NaN	NaN	0.286507	0.342167	0.30514	0.429543	0.543549	0.56427	0.549341	0.666795	0.566586	0.613129			0.456	NaN	NaN	0.203572	0.323543	0.276383	0.263038	0.275804	0.295785	0.345291	0.397238	0.408181	0.457073
0.457	NaN	NaN	0.3146	0.324405	0.263816	0.427968	0.533057	0.570373	0.684716	0.637799	0.574001	0.584227			0.457	NaN	NaN	0.187587	0.311127	0.248296	0.266794	0.270193	0.286679	0.370259	0.347571	0.388671	0.505676
0.458	NaN	NaN	0.305588	0.301692	0.310524	0.477688	0.499392	0.543463	0.596217	0.623364	0.540575	0.54784			0.458	NaN	NaN	0.206587	0.271925	0.245997	0.378571	0.248866	0.242595	0.367435	0.317377	0.387545	0.47817
0.459	NaN	NaN	0.356525	0.303298	0.29811	0.38871	0.512819	0.566177	0.61893	0.62804	0.561371	0.588276			0.459	NaN	NaN	0.215148	0.327176	0.237291	0.278294	0.260991	0.265903	0.371255	0.296748	0.403039	0.465475
0.46	NaN	NaN	0.312853	0.301435	0.319205	0.378803	0.515552	0.572992	0.579146	0.606191	0.554614	0.566659			0.46	NaN	NaN	0.205457	0.315261	0.231586	0.285514	0.252543	0.297398	0.353439	0.281979	0.386484	0.458081
0.461	NaN	NaN	0.297076	0.334751	0.328517	0.316156	0.502887	0.551006	0.485519	0.581012	0.518607	0.556934			0.461	NaN	NaN	0.193238	0.301421	0.237713	0.272004	0.244307	0.285737	0.376198	0.287751	0.374693	0.47566
0.462	NaN	NaN	0.280089	0.33011	0.398947	0.320037	0.503521	0.509186	0.55954	0.565083	0.506725	0.587453			0.462	NaN	NaN	0.16752	0.33495	0.223864	0.246631	0.241635	0.298444	0.404774	0.278336	0.41556	0.483364
0.463	NaN	NaN	0.326537	0.334793	0.337275	0.306005	0.503268	0.525892	0.518201	0.563488	0.524567	0.597885			0.463	NaN	NaN	0.242908	0.319485	0.223883	0.233509	0.237702	0.286473	0.347719	0.314252	0.399831	0.521582
0.464	NaN	NaN	0.317515	0.323186	0.314434	0.339383	0.506659	0.53544	0.538171	0.563723	0.542025	0.55975			0.464	NaN	NaN	0.166579	0.287939	0.235461	0.254111	0.247525	0.270801	0.337002	0.313693	0.372152	0.443045
0.465	NaN	NaN	0.323597	0.325284	0.291341	0.342721	0.513074	0.526513	0.497357	0.575282	0.536298	0.574303			0.465	NaN	NaN	0.186932	0.288958	0.226041	0.250214	0.222372	0.259059	0.347939	0.266726	0.369815	0.447733
0.466	NaN	NaN	0.309665	0.296234	0.28116	0.380907	0.484127	0.516297	0.468505	0.560546	0.497612	0.618941			0.466	NaN	NaN	0.174754	0.305109	0.22644	0.246931	0.249025	0.241367	0.320091	0.285001	0.348272	0.397825
0.467	NaN	NaN	0.279543	0.261575	0.264233	0.250205	0.454518	0.506897	0.509812	0.55574	0.471873	0.553884			0.467	NaN	NaN	0.180348	0.23663	0.229217	0.175009	0.227198	0.23551	0.351365	0.297387	0.32915	0.422364
0.468	NaN	NaN	0.26722	0.231464	0.255565	0.336022	0.508045	0.495761	0.529694	0.523866	0.496202	0.530297			0.468	NaN	NaN	0.188196	0.267338	0.222306	0.242929	0.228595	0.257024	0.331496	0.276836	0.355277	0.415665
0.469	NaN	NaN	0.236242	0.239857	0.264989	0.344015	0.46912	0.493988	0.520272	0.526838	0.47877	0.524088			0.469	NaN	NaN	0.196958	0.284361	0.184984	0.229114	0.229382	0.254743	0.318647	0.288999	0.361349	0.410568
0.47	NaN	NaN	0.230977	0.242826	0.231723	0.34574	0.460839	0.501299	0.469866	0.5457	0.501167	0.507907			0.47	NaN	NaN	0.196861	0.273589	0.219606	0.251861	0.238188	0.26331	0.252852	0.26415	0.348109	0.437957
0.471	NaN	NaN	0.248762	0.289766	0.270137	0.342644	0.463207	0.479013	0.48352	0.477359	0.487989	0.501894			0.471	NaN	NaN	0.203104	0.257513	0.203861	0.271648	0.232525	0.282842	0.358745	0.306165	0.357024	0.430045
0.472	NaN	NaN	0.237772	0.254623	0.329342	0.307384	0.464788	0.462937	0.479655	0.4896	0.465474	0.514102			0.472	NaN	NaN	0.177367	0.26862	0.198801	0.253454	0.233001	0.241831	0.313378	0.314774	0.292707	0.406602
0.473	NaN	NaN	0.242671	0.245567	0.309105	0.306936	0.44746	0.48298	0.475781	0.472808	0.463894	0.524122			0.473	NaN	NaN	0.191742	0.288265	0.191406	0.259317	0.23007	0.228985	0.309672	0.238323	0.339465	0.384555
0.474	NaN	NaN	0.270693	0.266729	0.284274	0.264991	0.443945	0.490531	0.472728	0.501091	0.44255	0.545228			0.474	NaN	NaN	0.218576	0.244613	0.184201	0.235239	0.2218	0.241015	0.281472	0.293944	0.335862	0.375637
0.475	NaN	NaN	0.226201	0.272049	0.236242	0.312656	0.444443	0.467415	0.42606	0.47764	0.424892	0.489711			0.475	NaN	NaN	0.183447	0.195245	0.25933	0.274852	0.204039	0.225695	0.292906	0.272987	0.349995	0.377606
0.476	NaN	NaN	0.266926	0.253695	0.266902	0.281314	0.413943	0.462026	0.441979	0.466956	0.4037	0.522947			0.476	NaN	NaN	0.17114	0.212816	0.229144	0.229339	0.210267	0.230051	0.304222	0.277135	0.350866	0.370587
0.477	NaN	NaN	0.244338	0.253088	0.262895	0.268328	0.404766	0.449286	0.452747	0.485333	0.429546	0.477707			0.477	NaN	NaN	0.155426	0.260772	0.205663	0.227412	0.209488	0.233339	0.29306	0.311624	0.321296	0.352479
0.478	NaN	NaN	0.284872	0.228029	0.263304	0.286624	0.407191	0.437043	0.433793	0.433705	0.411896	0.478052			0.478	NaN	NaN	0.0979439	0.256612	0.206792	0.219229	0.211975	0.232627	0.283678	0.293624	0.307851	0.340822
0.479	NaN	NaN	0.273358	0.247238	0.240486	0.29181	0.369163	0.39126	0.437632	0.442194	0.417647	0.473468			0.479	NaN	NaN	0.152291	0.282864	0.181708	0.221371	0.18815	0.233392	0.30311	0.263409	0.315548	0.326252
0.48	NaN	NaN	0.259382	0.224007	0.259368	0.288958	0.405401	0.414256	0.378816	0.481	0.409186	0.495311			0.48	NaN	NaN	0.178083	0.223718	0.196281	0.235082	0.205627	0.20098	0.282817	0.257669	0.332575	0.294355
0.481	NaN	NaN	0.245877	0.24306	0.245846	0.27833	0.395915	0.403973	0.409748	0.455901	0.42517	0.455765			0.481	NaN	NaN	0.171744	0.263775	0.224666	0.223192	0.215681	0.246505	0.313271	0.246711	0.323027	0.342416
0.482	NaN	NaN	0.238758	0.214944	0.224587	0.274654	0.398311	0.39975	0.462683	0.445414	0.466453	0.46125			0.482	NaN	NaN	0.157381	0.29528	0.237889	0.249655	0.217957	0.210295	0.201246	0.231132	0.34186	0.330656
0.483	NaN	NaN	0.192848	0.224843	0.240403	0.249853	0.361649	0.382019	0.400685	0.396799	0.390567	0.408154			0.483	NaN	NaN	0.158021	0.257734	0.188228	0.241273	0.20676	0.215916	0.293012	0.21429	0.321377	0.316397
0.484	NaN	NaN	0.230863	0.25487	0.215118	0.25333	0.373456	0.377217	0.356635	0.426915	0.368812	0.432105			0.484	NaN	NaN	0.186457	0.229951	0.196756	0.253072	0.204921	0.235799	0.292006	0.194555	0.284908	0.350649
0.485	NaN	NaN	0.292364	0.238184	0.251718	0.235527	0.350357	0.406589	0.379977	0.423411	0.394678	0.435624			0.485	NaN	NaN	0.177462	0.212066	0.145479	0.2336	0.201317	0.20589	0.270022	0.197466	0.298973	0.395736
0.486	NaN	NaN	0.257557	0.276254	0.238293	0.235505	0.365216	0.384087	0.383892	0.358837	0.384293	0.456818			0.486	NaN	NaN	0.170504	0.284458	0.207287	0.230785	0.184945	0.218462	0.27041	0.300218	0.307402	0.384929
0.487	NaN	NaN	0.224201	0.24282	0.24899	0.23226	0.370014	0.365378	0.359144	0.421733	0.371503	0.442862			0.487	NaN	NaN	0.172049	0.230784	0.198439	0.236828	0.190674	0.232557	0.264496	0.219029	0.300955	0.364027
0.488	NaN	NaN	0.225351	0.255718	0.237348	0.244785	0.357881	0.35479	0.346058	0.403074	0.355891	0.418389			0.488	NaN	NaN	0.153306	0.251043	0.205177	0.193249	0.190741	0.24548	0.286483	0.194236	0.317845	0.36723
0.489	NaN	NaN	0.208636	0.23944	0.232399	0.268514	0.351092	0.333516	0.282196	0.381145	0.345754	0.462939			0.489	NaN	NaN	0.127697	0.250152	0.171843	0.215605	0.198009	0.223047	0.269286	0.234643	0.303537	0.367944
0.49	NaN	NaN	0.216816	0.220567	0.19149	0.267478	0.291895	0.335136	0.331986	0.382424	0.322094	0.414156			0.49	NaN	NaN	0.128866	0.244277	0.197784	0.210589	0.200232	0.206785	0.22923	0.225833	0.25567	0.335243
0.491	NaN	NaN	0.20657	0.206503	0.24666	0.227317	0.337858	0.327748	0.318888	0.411496	0.363739	0.425677			0.491	NaN	NaN	0.134597	0.242603	0.16517	0.221922	0.184902	0.226198	0.257749	0.212397	0.291621	0.36392
0.492	NaN	NaN	0.213135	0.225125	0.217619	0.26777	0.316987	0.286871	0.309605	0.399653	0.335838	0.433094			0.492	NaN	NaN	0.126673	0.245261	0.141476	0.294753	0.174441	0.187845	0.23521	0.207692	0.287165	0.346906
0.493	NaN	NaN	0.196105	0.234413	0.214918	0.261254	0.302842	0.297411	0.335166	0.385279	0.307552	0.431485			0.493	NaN	NaN	0.122559	0.228968	0.165063	0.219268	0.168379	0.192302	0.275711	0.253954	0.291036	0.335631
0.494	NaN	NaN	0.185555	0.211374	0.205969	0.23147	0.306957	0.311661	0.303786	0.440537	0.336842	0.409872			0.494	NaN	NaN	0.162858	0.231741	0.186313	0.241882	0.183903	0.198178	0.270876	0.253035	0.269675	0.329373
0.495	NaN	NaN	0.202289	0.212592	0.206512	0.205516	0.299096	0.296573	0.346123	0.334828	0.299169	0.425082			0.495	NaN	NaN	0.159447	0.26502	0.172199	0.264068	0.176746	0.190191	0.213742	0.214444	0.25737	0.352202
0.496	NaN	NaN	0.229018	0.192214	0.202442	0.236358	0.29847	0.30909	0.3061	0.351527	0.340164	0.44562			0.496	NaN	NaN	0.229204	0.199836	0.164837	0.231793	0.178727	0.19701	0.215379	0.177073	0.259057	0.36041
0.497	NaN	NaN	0.203656	0.235375	0.20082	0.210661	0.297255	0.308449	0.332635	0.34045	0.299675	0.399733			0.497	NaN	NaN	0.161867	0.249889	0.15562	0.218185	0.181857	0.202569	0.220336	0.201956	0.290619	0.290593
0.498	NaN	NaN	0.181909	0.232532	0.200223	0.205437	0.284367	0.293938	0.298261	0.349036	0.28542	0.368008			0.498	NaN	NaN	0.152894	0.250091	0.127576	0.20927	0.167968	0.190591	0.195476	0.199396	0.295797	0.302353
0.499	NaN	NaN	0.195578	0.251266	0.211342	0.189389	0.280881	0.287035	0.300626	0.328986	0.298318	0.371162			0.499	NaN	NaN	0.138468	0.256866	0.16248	0.212931	0.162528	0.188661	0.222708	0.20001	0.280217	0.288662
0.5	NaN	NaN	0.19072	0.245198	0.190136	0.182662	0.283913	0.290745	0.286702	0.319082	0.299723	0.337784			0.5	NaN	NaN	0.131314	0.24394	0.1591	0.192649	0.158027	0.194947	0.216753	0.168545	0.272143	0.265831
0.501	NaN	NaN	0.224277	0.224085	0.243491	0.190787	0.296124	0.280305	0.302033	0.284865	0.249652	0.362259			0.501	NaN	NaN	0.119541	0.323712	0.184768	0.201915	0.197047	0.154861	0.204446	0.260931	0.24701	0.271947
0.502	NaN	NaN	0.237148	0.232273	0.206775	0.197623	0.275698	0.264367	0.272433	0.309066	0.265866	0.352329			0.502	NaN	NaN	0.121076	0.249133	0.157116	0.200646	0.169993	0.175981	0.185151	0.192119	0.248017	0.295722
0.503	NaN	NaN	0.193182	0.189798	0.201899	0.202858	0.243041	0.258266	0.223872	0.297588	0.270852	0.345797			0.503	NaN	NaN	0.100997	0.237797	0.165402	0.186211	0.175845	0.173693	0.200631	0.187123	0.252156	0.312634
0.504	NaN	NaN	0.167158	0.226632	0.184926	0.198943	0.243582	0.260505	0.256849	0.291814	0.28132	0.37617			0.504	NaN	NaN	0.133886	0.240553	0.150369	0.221548	0.163638	0.152545	0.198642	0.2344	0.264185	0.339161
0.505	NaN	NaN	0.143263	0.215679	0.18293	0.206816	0.239107	0.243678	0.248179	0.271114	0.285474	0.36642			0.505	NaN	NaN	0.125426	0.245204	0.140628	0.230493	0.153184	0.168911	0.185986	0.231015	0.283993	0.304626
0.506	NaN	NaN	0.156504	0.197414	0.205918	0.169476	0.229448	0.248766	0.241135	0.266793	0.282926	0.430232			0.506	NaN	NaN	0.181657	0.176776	0.148833	0.236403	0.164988	0.145322	0.188626	0.205462	0.272757	0.374461
0.507	NaN	NaN	0.136536	0.210044	0.197127	0.169555	0.242212	0.23363	0.253692	0.256059	0.224832	0.368364			0.507	NaN	NaN	0.132963	0.23176	0.165808	0.210583	0.158813	0.153091	0.166511	0.202389	0.253294	0.329535
0.508	NaN	NaN	0.15267	0.231013	0.210196	0.168444	0.252968	0.231228	0.207485	0.268777	0.247819	0.338232			0.508	NaN	NaN	0.163935	0.273331	0.153492	0.19259	0.162054	0.158132	0.250326	0.307744	0.272021	0.339014
0.509	NaN	NaN	0.155189	0.223495	0.215199	0.158558	0.233552	0.249078	0.248986	0.241981	0.262943	0.318596			0.509	NaN	NaN	0.121026	0.226282	0.151776	0.194771	0.169606	0.15206	0.221063	0.224021	0.254429	0.355898
0.51	NaN	NaN	0.160621	0.261213	0.176913	0.161032	0.256958	0.223434	0.239873	0.288292	0.240733	0.299401			0.51	NaN	NaN	0.158337	0.213831	0.156379	0.23465	0.17082	0.160301	0.219594	0.21078	0.248505	0.26855
0.511	NaN	NaN	0.179773	0.22536	0.260156	0.172998	0.251823	0.224816	0.2233	0.268785	0.263947	0.317624			0.511	NaN	NaN	0.158768	0.211523	0.185109	0.17945	0.157086	0.13655	0.201874	0.207431	0.264634	0.286147
0.512	NaN	NaN	0.174996	0.175219	0.211724	0.184206	0.21775	0.240332	0.235765	0.259936	0.176718	0.296837			0.512	NaN	NaN	0.134416	0.220452	0.163633	0.195008	0.167412	0.148172	0.193131	0.229374	0.222873	0.267603
0.513	NaN	NaN	0.198502	0.178671	0.190922	0.170261	0.216857	0.229787	0.214479	0.246253	0.227818	0.301709			0.513	NaN	NaN	0.13789	0.219827	0.162525	0.189874	0.142509	0.12518	0.179311	0.23685	0.252173	0.237859
0.514	NaN	NaN	0.174191	0.242778	0.2009	0.157303	0.208302	0.232438	0.226203	0.239516	0.226268	0.306954			0.514	NaN	NaN	0.114893	0.181202	0.149928	0.187916	0.149293	0.140374	0.206555	0.212342	0.241896	0.319012
0.515	NaN	NaN	0.144243	0.189072	0.173723	0.177079	0.204081	0.229661	0.212806	0.253969	0.238655	0.294347			0.515	NaN	NaN	0.0900195	0.227963	0.146718	0.189451	0.141762	0.15037	0.184533	0.214957	0.255165	0.294374
0.516	NaN	NaN	0.167765	0.225779	0.20681	0.160358	0.197128	0.215573	0.211991	0.242698	0.247986	0.295565			0.516	NaN	NaN	0.132657	0.222692	0.148012	0.189604	0.148046	0.124516	0.184282	0.234626	0.276255	0.336573
0.517	NaN	NaN	0.159005	0.158851	0.159154	0.161591	0.189431	0.194324	0.205053	0.261763	0.230235	0.275393			0.517	NaN	NaN	0.16075	0.13767	0.0924469	0.192184	0.148534	0.119793	0.171617	0.166603	0.264627	0.260922
0.518	NaN	NaN	0.159642	0.16149	0.161609	0.159082	0.192076	0.172987	0.16342	0.253754	0.176657	0.27166			0.518	NaN	NaN	0.140978	0.242949	0.16205	0.207368	0.150292	0.118909	0.16349	0.131025	0.230078	0.238131
0.519	NaN	NaN	0.167245	0.196937	0.162044	0.148347	0.192925	0.196918	0.193159	0.255905	0.205678	0.254669			0.519	NaN	NaN	0.141603	0.231365	0.144026	0.172986	0.150727	0.101282	0.199203	0.176825	0.295202	0.253536
0.52	NaN	NaN	0.16411	0.216332	0.198928	0.139555	0.208416	0.209174	0.180421	0.229757	0.225808	0.27294			0.52	NaN	NaN	0.15563	0.273789	0.203336	0.184155	0.152938	0.12199	0.131326	0.184493	0.282989	0.197447
0.521	NaN	NaN	0.158831	0.216001	0.172735	0.156857	0.205709	0.196417	0.172491	0.208736	0.197727	0.278832			0.521	NaN	NaN	0.128928	0.217184	0.154452	0.185605	0.142183	0.115364	0.17718	0.207189	0.273892	0.264529
0.522	NaN	NaN	0.162586	0.184191	0.130158	0.123155	0.190324	0.168675	0.185825	0.238356	0.211513	0.251208			0.522	NaN	NaN	0.1284	0.252138	0.147441	0.182765	0.149244	0.125723	0.215558	0.147123	0.236593	0.226635
0.523	NaN	NaN	0.145998	0.204277	0.158894	0.130198	0.15059	0.17373	0.187211	0.232363	0.214924	0.275416			0.523	NaN	NaN	0.110803	0.230789	0.131296	0.190686	0.137191	0.114693	0.189018	0.228586	0.23813	0.268379
0.524	NaN	NaN	0.147457	0.184966	0.157496	0.133114	0.16931	0.177899	0.177478	0.189183	0.16813	0.282652			0.524	NaN	NaN	0.11778	0.239656	0.152122	0.180908	0.133088	0.132637	0.177404	0.20485	0.195775	0.22469
0.525	NaN	NaN	0.16247	0.206261	0.146049	0.154082	0.166014	0.188026	0.165489	0.209106	0.190344	0.25583			0.525	NaN	NaN	0.096826	0.231337	0.13917	0.182371	0.131258	0.116072	0.190827	0.190439	0.188645	0.207367
0.526	NaN	NaN	0.150869	0.189157	0.153947	0.133693	0.156773	0.183879	0.137789	0.208204	0.200471	0.265678			0.526	NaN	NaN	0.133308	0.237178	0.134238	0.221729	0.149301	0.127822	0.181627	0.225994	0.236693	0.280291
0.527	NaN	NaN	0.169967	0.190796	0.145009	0.178183	0.159784	0.168831	0.161495	0.205111	0.188139	0.257557			0.527	NaN	NaN	0.11461	0.221811	0.144765	0.232652	0.136217	0.121069	0.178129	0.211997	0.225029	0.207714
0.528	NaN	NaN	0.162339	0.173563	0.146461	0.140235	0.155559	0.15702	0.151771	0.196236	0.159069	0.299141			0.528	NaN	NaN	0.221932	0.206657	0.13	0.193136	0.136661	0.128591	0.166309	0.212723	0.25887	0.257531
0.529	NaN	NaN	0.138096	0.166478	0.159305	0.152679	0.167743	0.159653	0.145703	0.185482	0.17496	0.278158			0.529	NaN	NaN	0.127744	0.218002	0.102696	0.173572	0.148307	0.109052	0.166276	0.157307	0.260614	0.274841
0.53	NaN	NaN	0.128843	0.159048	0.191253	0.148068	0.153409	0.148705	0.156726	0.188051	0.162119	0.267022			0.53	NaN	NaN	0.14726	0.242804	0.173944	0.188986	0.121434	0.121184	0.167449	0.210664	0.259715	0.244164
0.531	NaN	NaN	0.15066	0.162032	0.170426	0.116763	0.166749	0.182916	0.155837	0.172188	0.181921	0.248237			0.531	NaN	NaN	0.132889	0.227495	0.149858	0.189848	0.124423	0.109598	0.167726	0.160512	0.249791	0.25187
0.532	NaN	NaN	0.123742	0.178969	0.167539	0.11805	0.145748	0.169055	0.133977	0.160354	0.200266	0.242864			0.532	NaN	NaN	0.112255	0.205621	0.134979	0.183084	0.129735	0.1143	0.14758	0.171984	0.229342	0.218148
0.533	NaN	NaN	0.134589	0.223252	0.152867	0.122543	0.15375	0.166087	0.147416	0.170894	0.185632	0.234673			0.533	NaN	NaN	0.129768	0.25274	0.133981	0.196326	0.120841	0.0963325	0.169464	0.18009	0.261657	0.240902
0.534	NaN	NaN	0.135951	0.210661	0.158426	0.118189	0.137527	0.151709	0.148882	0.164519	0.189673	0.226598			0.534	NaN	NaN	0.133864	0.243357	0.133245	0.214903	0.123364	0.100546	0.140691	0.210956	0.249881	0.220545
0.535	NaN	NaN	0.165281	0.210728	0.151005	0.0907052	0.137711	0.148753	0.141881	0.164471	0.145383	0.251666			0.535	NaN	NaN	0.117076	0.225603	0.134223	0.14057	0.136985	0.108557	0.154816	0.206018	0.192384	0.202429
0.536	NaN	NaN	0.134624	0.1628	0.135207	0.138068	0.142236	0.148544	0.126334	0.154729	0.181576	0.31191			0.536	NaN	NaN	0.118505	0.172899	0.125109	0.214833	0.136376	0.126898	0.166279	0.183798	0.216427	0.248431
0.537	NaN	NaN	0.147588	0.18872	0.144516	0.133303	0.136248	0.137449	0.166508	0.197607	0.182755	0.265033			0.537	NaN	NaN	0.131062	0.170417	0.128013	0.182979	0.116963	0.111989	0.182829	0.213043	0.238503	0.223256
0.538	NaN	NaN	0.126554	0.180639	0.148983	0.105844	0.138481	0.125888	0.152768	0.153126	0.161669	0.222385			0.538	NaN	NaN	0.153923	0.204142	0.128167	0.162235	0.120434	0.10271	0.136922	0.141225	0.246006	0.217171
0.539	NaN	NaN	0.13782	0.170439	0.14379	0.0889005	0.140233	0.115501	0.132921	0.147637	0.161695	0.227857			0.539	NaN	NaN	0.219974	0.242211	0.144926	0.170385	0.104781	0.12559	0.13096	0.127467	0.256812	0.207622
0.54	NaN	NaN	0.0795473	0.179819	0.162064	0.102947	0.13469	0.118305	0.14208	0.141733	0.177621	0.211324			0.54	NaN	NaN	0.0706542	0.22121	0.141498	0.207497	0.110958	0.106342	0.143204	0.140904	0.25602	0.234073
0.541	NaN	NaN	0.110294	0.150206	0.140741	0.111675	0.129797	0.097151	0.120151	0.155777	0.154686	0.201426			0.541	NaN	NaN	0.158653	0.204242	0.135658	0.218913	0.133756	0.110195	0.179742	0.136339	0.219657	0.251301
0.542	NaN	NaN	0.130642	0.151182	0.132373	0.119618	0.135664	0.109745	0.125406	0.161347	0.161985	0.174483			0.542	NaN	NaN	0.100779	0.223886	0.11365	0.212258	0.124771	0.111492	0.164372	0.139618	0.240823	0.19624
0.543	NaN	NaN	0.112057	0.155703	0.137832	0.107483	0.129381	0.12452	0.141938	0.16828	0.158637	0.230379			0.543	NaN	NaN	0.0899491	0.230784	0.135136	0.207179	0.120951	0.11887	0.18863	0.142227	0.210928	0.175447
0.544	NaN	NaN	0.129087	0.137622	0.118186	0.177689	0.113402	0.119859	0.120083	0.163421	0.161147	0.219917			0.544	NaN	NaN	0.102719	0.189397	0.130538	0.29157	0.117026	0.0917639	0.164544	0.140326	0.226942	0.202946
0.545	NaN	NaN	0.128108	0.165675	0.122851	0.130046	0.128599	0.128711	0.120979	0.177178	0.166504	0.24461			0.545	NaN	NaN	0.131579	0.183503	0.134811	0.21339	0.103149	0.105626	0.181283	0.209342	0.237315	0.186142
0.546	NaN	NaN	0.130449	0.157935	0.140558	0.103348	0.115747	0.115682	0.112873	0.138593	0.180809	0.254577			0.546	NaN	NaN	0.113602	0.229581	0.137943	0.21271	0.115618	0.130084	0.138204	0.174108	0.222901	0.234352
0.547	NaN	NaN	0.1277	0.16047	0.147705	0.111523	0.117563	0.119815	0.128448	0.149056	0.133715	0.205687			0.547	NaN	NaN	0.120182	0.241476	0.130462	0.196788	0.116715	0.112251	0.135508	0.198821	0.193122	0.245271
0.548	NaN	NaN	0.133033	0.103798	0.13485	0.102692	0.124421	0.113201	0.117348	0.16073	0.181394	0.223704			0.548	NaN	NaN	0.122106	0.175082	0.116297	0.193669	0.117304	0.110803	0.13632	0.167524	0.181972	0.271847
0.549	NaN	NaN	0.127311	0.151364	0.132042	0.102312	0.121172	0.113228	0.128809	0.147847	0.163171	0.217305			0.549	NaN	NaN	0.135255	0.21694	0.132669	0.184416	0.111345	0.117631	0.139825	0.1758	0.214193	0.249664
0.55	NaN	NaN	0.179009	0.129857	0.161295	0.124708	0.11448	0.108515	0.129686	0.148963	0.167705	0.180288			0.55	NaN	NaN	0.143899	0.191071	0.143534	0.205624	0.0997527	0.0903054	0.153891	0.160845	0.231039	0.20069
0.551	NaN	NaN	0.109923	0.134713	0.142769	0.120334	0.11775	0.105061	0.114104	0.140058	0.166516	0.193572			0.551	NaN	NaN	0.106643	0.195147	0.124727	0.202337	0.112651	0.0989589	0.179201	0.137337	0.228644	0.204717
0.552	NaN	NaN	0.119078	0.157579	0.143028	0.105051	0.124232	0.106767	0.142394	0.126662	0.146079	0.194135			0.552	NaN	NaN	0.110851	0.186393	0.132118	0.210119	0.10878	0.0949092	0.164938	0.172721	0.201866	0.239501
0.553	NaN	NaN	0.104444	0.15081	0.120715	0.134725	0.117622	0.110255	0.129097	0.141786	0.159512	0.204913			0.553	NaN	NaN	0.101608	0.17569	0.137737	0.236351	0.125798	0.0924392	0.146415	0.12338	0.205176	0.206695
0.554	NaN	NaN	0.115833	0.137031	0.140627	0.102375	0.115463	0.101631	0.120214	0.119727	0.155106	0.192864			0.554	NaN	NaN	0.0785822	0.194139	0.126462	0.200447	0.122117	0.0863911	0.140726	0.128274	0.219106	0.212859
0.555	NaN	NaN	0.121868	0.141547	0.132428	0.0878199	0.114381	0.0912775	0.10432	0.146221	0.176869	0.146435			0.555	NaN	NaN	0.0673177	0.211357	0.1099	0.194033	0.115512	0.0601025	0.164953	0.151034	0.256468	0.149786
0.556	NaN	NaN	0.0773155	0.14029	0.13623	0.0955438	0.107395	0.108007	0.113703	0.131914	0.16454	0.207106			0.556	NaN	NaN	0.060075	0.209068	0.112619	0.16613	0.115288	0.0716603	0.173149	0.162918	0.199218	0.196474
0.557	NaN	NaN	0.109825	0.129405	0.138373	0.0975616	0.105784	0.109407	0.0896224	0.164272	0.167801	0.170702			0.557	NaN	NaN	0.0990137	0.210775	0.109121	0.199518	0.116148	0.0732958	0.143288	0.14591	0.219144	0.195312
0.558	NaN	NaN	0.138818	0.256016	0.119167	0.0873228	0.109472	0.0972366	0.101302	0.156259	0.139477	0.185294			0.558	NaN	NaN	0.0851988	0.219388	0.117544	0.15797	0.115033	0.0870151	0.12982	0.169768	0.162204	0.202182
0.559	NaN	NaN	0.117653	0.127848	0.154585	0.091959	0.103169	0.101107	0.0945215	0.150057	0.171527	0.206544			0.559	NaN	NaN	0.105638	0.189961	0.14471	0.161267	0.104624	0.0917829	0.120958	0.170307	0.233619	0.197011
0.56	NaN	NaN	0.136108	0.160732	0.142549	0.0975341	0.100142	0.0979292	0.112194	0.139775	0.147755	0.189405			0.56	NaN	NaN	0.0917087	0.194339	0.127809	0.172543	0.110592	0.0982472	0.12395	0.123514	0.206375	0.192655
0.561	NaN	NaN	0.154004	0.139699	0.122197	0.089707	0.09387	0.090484	0.0964663	0.108888	0.145826	0.20501			0.561	NaN	NaN	0.115371	0.228036	0.130117	0.170079	0.104278	0.0967783	0.121285	0.156849	0.190002	0.182538
0.562	NaN	NaN	0.111716	0.139854	0.119782	0.0968377	0.100743	0.0851867	0.0880152	0.109317	0.144146	0.183999			0.562	NaN	NaN	0.103437	0.207131	0.133882	0.247558	0.104394	0.104772	0.130306	0.107977	0.210498	0.153791
0.563	NaN	NaN	0.119795	0.142348	0.118241	0.0684218	0.0919627	0.0837236	0.0952018	0.128716	0.134744	0.156482			0.563	NaN	NaN	0.101952	0.180981	0.133586	0.180777	0.0951744	0.102714	0.138556	0.158601	0.217491	0.178215
0.564	NaN	NaN	0.10929	0.163193	0.134999	0.075508	0.0884093	0.0811519	0.112968	0.111726	0.112079	0.137094			0.564	NaN	NaN	0.122506	0.177979	0.115035	0.163865	0.0858719	0.0960983	0.122787	0.156295	0.18657	0.255617
0.565	NaN	NaN	0.106409	0.146311	0.12322	0.0810765	0.0881496	0.0855519	0.087442	0.115534	0.145285	0.163703			0.565	NaN	NaN	0.133562	0.201499	0.124508	0.202781	0.106231	0.0940698	0.105375	0.131367	0.210398	0.186926
0.566	NaN	NaN	0.0948999	0.160976	0.116174	0.0910962	0.100492	0.0805214	0.10753	0.143717	0.148676	0.190142			0.566	NaN	NaN	0.126638	0.202507	0.122287	0.191223	0.114234	0.0792785	0.131476	0.15698	0.211413	0.168564
0.567	NaN	NaN	0.108063	0.152486	0.11149	0.0880811	0.0885166	0.0856943	0.110135	0.120947	0.174983	0.211574			0.567	NaN	NaN	0.0887571	0.207594	0.0736695	0.179347	0.114961	0.102028	0.153626	0.171316	0.228331	0.231322
0.568	NaN	NaN	0.12363	0.13307	0.123823	0.0851583	0.092634	0.0809558	0.0981553	0.124828	0.137033	0.201984			0.568	NaN	NaN	0.118135	0.213507	0.145398	0.190997	0.110958	0.0984259	0.12758	0.148412	0.211021	0.235337
0.569	NaN	NaN	0.108703	0.188425	0.148534	0.0962488	0.100337	0.0831802	0.0980527	0.130275	0.1666	0.177273			0.569	NaN	NaN	0.143355	0.163928	0.166877	0.167851	0.0960341	0.093435	0.110704	0.164024	0.218445	0.221659
0.57	NaN	NaN	0.125434	0.124882	0.112357	0.0682983	0.0936935	0.0705061	0.0729925	0.129918	0.107906	0.20123			0.57	NaN	NaN	0.137044	0.252298	0.13104	0.117946	0.106625	0.0899736	0.133991	0.165791	0.176505	0.179123
0.571	NaN	NaN	0.0970827	0.151417	0.134244	0.112405	0.0916695	0.0767144	0.0845841	0.0923718	0.131655	0.173846			0.571	NaN	NaN	0.117269	0.238472	0.0901252	0.190412	0.108383	0.0851203	0.115755	0.123262	0.164236	0.146529
0.572	NaN	NaN	0.172341	0.176377	0.121984	0.0705615	0.0859804	0.0823501	0.0968033	0.116561	0.128211	0.15295			0.572	NaN	NaN	0.201794	0.215722	0.127439	0.189335	0.0984895	0.0917914	0.121041	0.1559	0.179166	0.175738
0.573	NaN	NaN	0.123093	0.129776	0.139169	0.0566488	0.0858284	0.0676722	0.0843376	0.0953834	0.130717	0.164219			0.573	NaN	NaN	0.147925	0.175616	0.11632	0.219989	0.0970531	0.0821065	0.120754	0.128682	0.184616	0.192549
0.574	NaN	NaN	0.112281	0.152467	0.119278	0.0781628	0.0888703	0.0798966	0.0932852	0.133726	0.142651	0.183978			0.574	NaN	NaN	0.124826	0.225636	0.106698	0.19631	0.0921872	0.0860967	0.124914	0.139111	0.188397	0.177195
0.575	NaN	NaN	0.0959451	0.130644	0.116644	0.0719291	0.0908231	0.0750031	0.0953731	0.146094	0.122417	0.155418			0.575	NaN	NaN	0.108421	0.2025	0.132803	0.198349	0.100971	0.0963534	0.124697	0.117504	0.157351	0.171278
0.576	NaN	NaN	0.0989596	0.184094	0.110599	0.0667679	0.0892526	0.0793631	0.0947572	0.124261	0.134895	0.164226			0.576	NaN	NaN	0.0927186	0.245214	0.125037	0.183658	0.101426	0.0891499	0.130999	0.133948	0.174412	0.178902
0.577	NaN	NaN	0.115948	0.146539	0.110665	0.0901538	0.0897138	0.0658764	0.106978	0.126982	0.13642	0.136543			0.577	NaN	NaN	0.101987	0.186899	0.136834	0.199712	0.0981105	0.0865385	0.100897	0.11767	0.158686	0.190433
0.578	NaN	NaN	0.107348	0.146992	0.120686	0.0959117	0.0954007	0.0698515	0.103613	0.122341	0.136292	0.174419			0.578	NaN	NaN	0.116435	0.20168	0.114684	0.171767	0.0987757	0.0829751	0.100899	0.139438	0.182826	0.174782
0.579	NaN	NaN	0.101454	0.130432	0.165183	0.0996528	0.0897965	0.0677182	0.0917913	0.119	0.15395	0.159336			0.579	NaN	NaN	0.119081	0.197471	0.134366	0.22832	0.0881504	0.0842091	0.10329	0.154702	0.207274	0.167994
0.58	NaN	NaN	0.145042	0.144974	0.100885	0.0789778	0.0896113	0.0707909	0.090686	0.118115	0.134386	0.159199			0.58	NaN	NaN	0.112369	0.204819	0.0912768	0.192359	0.091901	0.0783952	0.111095	0.21733	0.176607	0.151441
0.581	NaN	NaN	0.112205	0.105535	0.122175	0.0748329	0.0887713	0.0702609	0.0789731	0.12399	0.114396	0.173024			0.581	NaN	NaN	0.0970059	0.179015	0.123065	0.187349	0.101515	0.0998659	0.0929279	0.156438	0.174853	0.15303
0.582	NaN	NaN	0.0949317	0.137184	0.122557	0.0665246	0.0799396	0.0803341	0.102298	0.140881	0.134274	0.206152			0.582	NaN	NaN	0.108399	0.160349	0.135511	0.182042	0.100345	0.0805538	0.117152	0.170529	0.202837	0.161558
0.583	NaN	NaN	0.166506	0.11883	0.120343	0.086406	0.0861662	0.072249	0.0864615	0.0932164	0.143056	0.192267			0.583	NaN	NaN	0.163827	0.211688	0.112694	0.178912	0.10419	0.0838416	0.0981822	0.117697	0.167597	0.18474
0.584	NaN	NaN	0.114949	0.13312	0.116997	0.0896062	0.0754694	0.0765011	0.0877887	0.074481	0.129654	0.180505			0.584	NaN	NaN	0.128299	0.221517	0.114786	0.158816	0.107124	0.0987819	0.092379	0.10632	0.15439	0.239063
0.585	NaN	NaN	0.107384	0.153309	0.131683	0.0865242	0.0793356	0.0710109	0.0927406	0.102554	0.123652	0.177727			0.585	NaN	NaN	0.129082	0.200516	0.111487	0.174684	0.100938	0.0755258	0.126911	0.106905	0.165717	0.220536
0.586	NaN	NaN	0.086558	0.170394	0.111935	0.0955496	0.0711821	0.0684378	0.0908128	0.0899777	0.127969	0.163766			0.586	NaN	NaN	0.12307	0.201458	0.122535	0.173343	0.0953172	0.0947457	0.106097	0.131427	0.156527	0.191324
0.587	NaN	NaN	0.0795473	0.155565	0.118512	0.0750771	0.0720268	0.0621651	0.083681	0.110213	0.111922	0.185167			0.587	NaN	NaN	0.118501	0.217764	0.127401	0.174287	0.0791441	0.0840088	0.116025	0.109816	0.15415	0.205522
0.588	NaN	NaN	0.0984388	0.143491	0.104167	0.0861034	0.091894	0.0780197	0.0894004	0.143551	0.127203	0.209985			0.588	NaN	NaN	0.12085	0.213168	0.103497	0.384839	0.089809	0.0760647	0.161265	0.148667	0.168894	0.175225
0.589	NaN	NaN	0.11354	0.171263	0.0986415	0.0578879	0.0878169	0.0683683	0.0922311	0.14354	0.146457	0.170007			0.589	NaN	NaN	0.116284	0.186558	0.105689	0.1789	0.0915522	0.0978379	0.122952	0.219331	0.211675	0.160798
0.59	NaN	NaN	0.10914	0.140025	0.101556	0.0657437	0.0894589	0.0711314	0.0836389	0.102997	0.131863	0.17792			0.59	NaN	NaN	0.116233	0.216569	0.118536	0.181596	0.0765023	0.0809064	0.110942	0.159771	0.204464	0.182597
0.591	NaN	NaN	0.123983	0.151275	0.10192	0.0736771	0.0844401	0.0791069	0.0724059	0.092398	0.128789	0.192874			0.591	NaN	NaN	0.107062	0.207885	0.119924	0.193042	0.105026	0.103027	0.132074	0.126697	0.203936	0.191114
0.592	NaN	NaN	0.0984364	0.16129	0.0960092	0.080332	0.0753421	0.0782392	0.0924219	0.101853	0.0966841	0.176316			0.592	NaN	NaN	0.107916	0.213743	0.114137	0.179504	0.0834892	0.103778	0.123083	0.1485	0.162013	0.192037
0.593	NaN	NaN	0.0731551	0.152106	0.101033	0.0586943	0.0726813	0.0550545	0.0830617	0.0870223	0.126511	0.16748			0.593	NaN	NaN	0.16991	0.215131	0.104595	0.172045	0.103894	0.0940882	0.155762	0.156833	0.182997	0.194719
0.594	NaN	NaN	0.0883252	0.141571	0.11578	0.0799777	0.0795962	0.0584931	0.0668732	0.120268	0.117246	0.16374			0.594	NaN	NaN	0.105616	0.223611	0.110454	0.15796	0.098894	0.0952564	0.139359	0.142397	0.160032	0.156724
0.595	NaN	NaN	0.0846838	0.137645	0.106498	0.084321	0.0656351	0.0654498	0.057071	0.0647558	0.122832	0.157881			0.595	NaN	NaN	0.117852	0.271213	0.11113	0.179216	0.0722011	0.0785657	0.103254	0.0797353	0.150604	0.18321
0.596	NaN	NaN	0.0786488	0.127045	0.113779	0.0774176	0.0785285	0.0696477	0.0674024	0.112971	0.138933	0.166904			0.596	NaN	NaN	0.0966879	0.207464	0.0998872	0.179699	0.0740063	0.0942169	0.115058	0.184873	0.179684	0.233627
0.597	NaN	NaN	0.0678481	0.119862	0.10304	0.0981204	0.0845165	0.070467	0.0677301	0.0831414	0.132914	0.129151			0.597	NaN	NaN	0.0693285	0.196436	0.119219	0.211172	0.0867388	0.0841532	0.0787606	0.127519	0.169965	0.189513
0.598	NaN	NaN	0.100884	0.129409	0.118507	0.0657086	0.0590111	0.0584893	0.0779636	0.0958644	0.107255	0.178971			0.598	NaN	NaN	0.0959004	0.199703	0.123944	0.179186	0.0623974	0.0619613	0.133448	0.151655	0.210321	0.202898
0.599	NaN	NaN	0.0910751	0.129316	0.0734142	0.0698634	0.062567	0.069565	0.0919812	0.0906954	0.121033	0.188408			0.599	NaN	NaN	0.111772	0.221897	0.0995174	0.179643	0.0790792	0.0952155	0.117657	0.155061	0.18876	0.233033
0.6	NaN	NaN	0.0803786	0.139632	0.08552	0.0578602	0.0726385	0.0695617	0.0671498	0.125259	0.103537	0.188583			0.6	NaN	NaN	0.118283	0.225765	0.121698	0.191366	0.0729086	0.0884039	0.112297	0.120528	0.159939	0.22522
0.601	NaN	NaN	0.0984655	0.164747	0.0904374	0.0723017	0.064726	0.0607391	0.0855413	0.0885415	0.105568	0.173993			0.601	NaN	NaN	0.0864956	0.223453	0.125808	0.174364	0.0733354	0.0799239	0.129754	0.130066	0.167535	0.248435
0.602	NaN	NaN	0.0919189	0.102899	0.0987232	0.0621572	0.0745501	0.0738275	0.101022	0.0692099	0.123987	0.167964			0.602	NaN	NaN	0.0766202	0.192838	0.118208	0.18487	0.0736592	0.0667806	0.133254	0.115576	0.160163	0.211503
0.603	NaN	NaN	0.0808226	0.149996	0.0848475	0.0811207	0.07381	0.0724964	0.0750715	0.106912	0.103074	0.17068			0.603	NaN	NaN	0.049616	0.190932	0.114232	0.18564	0.0753222	0.0626572	0.126501	0.135515	0.171805	0.183252
0.604	NaN	NaN	0.0789895	0.162003	0.0867047	0.0549532	0.0767035	0.0691194	0.0769685	0.0974491	0.105953	0.153117			0.604	NaN	NaN	0.0927163	0.188073	0.116547	0.1124	0.0791729	0.0826248	0.118161	0.145552	0.174381	0.179064
0.605	NaN	NaN	0.0937453	0.118318	0.0765609	0.0777232	0.0704079	0.0773175	0.0680643	0.0965946	0.116389	0.114469			0.605	NaN	NaN	0.0774298	0.178297	0.0857225	0.210463	0.0882107	0.0863175	0.104861	0.159153	0.196851	0.151013
0.606	NaN	NaN	0.0768271	0.120438	0.106812	0.0567051	0.0741833	0.0567183	0.0723015	0.099713	0.0971993	0.160576			0.606	NaN	NaN	0.0840989	0.149134	0.10685	0.169044	0.0779666	0.0721331	0.103278	0.115701	0.182649	0.22939
0.607	NaN	NaN	0.0942325	0.117522	0.100411	0.0592907	0.0676188	0.0594148	0.0673155	0.105282	0.107944	0.153254			0.607	NaN	NaN	0.106159	0.166969	0.105455	0.158185	0.0589974	0.0813404	0.133944	0.118185	0.168087	0.217468
0.608	NaN	NaN	0.0753422	0.117211	0.122403	0.0627334	0.0780403	0.0531119	0.0761761	0.130805	0.0993225	0.140007			0.608	NaN	NaN	0.112045	0.21047	0.0954973	0.181965	0.0661532	0.0900216	0.142396	0.0700035	0.140628	0.177401
0.609	NaN	NaN	0.0848044	0.128357	0.0971717	0.061795	0.0656722	0.0587976	0.0817147	0.133147	0.10275	0.168425			0.609	NaN	NaN	0.0622979	0.199398	0.114033	0.18267	0.0796169	0.0636289	0.118303	0.0935442	0.131753	0.171513
0.61	NaN	NaN	0.078617	0.118561	0.101423	0.0458934	0.061668	0.0547694	0.0811366	0.147476	0.0964651	0.135057			0.61	NaN	NaN	0.0848287	0.123281	0.117591	0.182111	0.073588	0.0960072	0.0878571	0.133799	0.110992	0.15429
0.611	NaN	NaN	0.0874827	0.105888	0.121165	0.0600224	0.0664616	0.066078	0.0739569	0.112718	0.0869582	0.147504			0.611	NaN	NaN	0.095733	0.159833	0.10397	0.186604	0.0761647	0.0949317	0.125363	0.10408	0.149825	0.171136
0.612	NaN	NaN	0.0827618	0.103171	0.0948857	0.0820569	0.0665815	0.0669125	0.0759092	0.0944834	0.125781	0.151686			0.612	NaN	NaN	0.111307	0.129129	0.0989919	0.185879	0.0862341	0.078863	0.117858	0.131024	0.15933	0.169953
0.613	NaN	NaN	0.0803365	0.107	0.112309	0.0373743	0.0817454	0.0628314	0.0558459	0.0779704	0.119341	0.18302			0.613	NaN	NaN	0.094697	0.169963	0.101969	0.137754	0.0909038	0.0746799	0.0932822	0.145694	0.149615	0.169171
0.614	NaN	NaN	0.0826502	0.107197	0.0948923	0.0859523	0.0726599	0.0676515	0.0609456	0.0864278	0.125421	0.174602			0.614	NaN	NaN	0.0956684	0.218423	0.106726	0.20551	0.079633	0.0807825	0.102169	0.136148	0.173511	0.201773
0.615	NaN	NaN	0.0789895	0.127922	0.0887275	0.0715564	0.070853	0.0569357	0.0581882	0.0771017	0.118159	0.144851			0.615	NaN	NaN	0.176622	0.16272	0.116681	0.166053	0.0794369	0.0751716	0.104096	0.169422	0.190543	0.153503
0.616	NaN	NaN	0.0948565	0.114551	0.107818	0.0694903	0.0616355	0.06078	0.0784067	0.0877938	0.139363	0.161727			0.616	NaN	NaN	0.103831	0.177814	0.127812	0.177136	0.0873024	0.0805734	0.106867	0.164888	0.166225	0.150158
0.617	NaN	NaN	0.0958881	0.0599631	0.107658	0.0668932	0.0657419	0.0511462	0.0649736	0.0884623	0.116436	0.182739			0.617	NaN	NaN	0.0996942	0.183869	0.116312	0.153286	0.0809666	0.0802058	0.125707	0.14467	0.161839	0.18848
0.618	NaN	NaN	0.0623306	0.109073	0.0801863	0.0654682	0.0663147	0.0441438	0.0683592	0.0857223	0.0987118	0.146415			0.618	NaN	NaN	0.0511487	0.18	0.103899	0.161821	0.0674553	0.0614151	0.124345	0.159335	0.17945	0.164162
0.619	NaN	NaN	0.0792864	0.121198	0.0723097	0.0736801	0.0637687	0.0384691	0.0627637	0.115459	0.11311	0.13348			0.619	NaN	NaN	0.0699092	0.173297	0.0925325	0.189661	0.0755358	0.0669432	0.0979676	0.125838	0.17088	0.181317
0.62	NaN	NaN	0.0733905	0.159105	0.100581	0.0701033	0.0686919	0.063964	0.0440789	0.104951	0.111277	0.172505			0.62	NaN	NaN	0.0640358	0.153729	0.108105	0.180341	0.0808351	0.0846565	0.105899	0.117674	0.155044	0.224665
0.621	NaN	NaN	0.0794846	0.154923	0.0977422	0.0699854	0.0656045	0.0834567	0.0777623	0.102504	0.0983719	0.137593			0.621	NaN	NaN	0.0796063	0.0846104	0.0828374	0.172998	0.0832705	0.0808319	0.114772	0.118633	0.12459	0.241947
0.622	NaN	NaN	0.0919643	0.12974	0.0924514	0.0523746	0.0733155	0.0700235	0.076019	0.114834	0.11529	0.128302			0.622	NaN	NaN	0.0839954	0.158421	0.0727127	0.181316	0.0761638	0.071346	0.0949398	0.138355	0.156704	0.255016
0.623	NaN	NaN	0.0814501	0.0989978	0.0994754	0.0703453	0.0819634	0.0623321	0.0565694	0.0881033	0.107709	0.182438			0.623	NaN	NaN	0.0741249	0.151156	0.0756771	0.2271	0.0987184	0.0751865	0.0816241	0.125251	0.143954	0.234788
0.624	NaN	NaN	0.0938569	0.0714504	0.0693961	0.0695019	0.0633453	0.0547891	0.0582604	0.100504	0.101967	0.190093			0.624	NaN	NaN	0.0838233	0.180884	0.0961982	0.158644	0.0716807	0.0957085	0.0966473	0.109542	0.159348	0.199735
0.625	NaN	NaN	0.0825158	0.0710847	0.097861	0.0684858	0.0737676	0.0602766	0.0636549	0.117159	0.0753069	0.20234			0.625	NaN	NaN	0.10878	0.183613	0.114109	0.169755	0.0823576	0.0705485	0.104903	0.149026	0.154364	0.230044
0.626	NaN	NaN	0.109829	0.0835508	0.101598	0.0914599	0.0551007	0.0472703	0.063333	0.0741073	0.0970175	0.16317			0.626	NaN	NaN	0.137187	0.187409	0.113002	0.14443	0.0824284	0.080642	0.0876681	0.120123	0.159888	0.208786
0.627	NaN	NaN	0.082074	0.085571	0.111845	0.0671573	0.06115	0.0446094	0.0571436	0.105899	0.061167	0.183966			0.627	NaN	NaN	0.141234	0.193202	0.138812	0.144172	0.0765826	0.0683801	0.0951517	0.145415	0.142675	0.210252
0.628	NaN	NaN	0.102866	0.0883983	0.103589	0.0469686	0.0633641	0.047377	0.050659	0.094997	0.0789854	0.161584			0.628	NaN	NaN	0.0883204	0.185403	0.102125	0.163533	0.07543	0.059721	0.0797651	0.150836	0.1749	0.209463
0.629	NaN	NaN	0.0844993	0.102491	0.0854688	0.0603246	0.0544872	0.0566182	0.0732825	0.0538019	0.0764401	0.141834			0.629	NaN	NaN	0.0895114	0.171716	0.0978552	0.14679	0.0725086	0.0640148	0.11145	0.072379	0.152211	0.227382
0.63	NaN	NaN	0.0805892	0.108401	0.0826015	0.0592691	0.0658195	0.0636621	0.076879	0.118905	0.0888464	0.152868			0.63	NaN	NaN	0.0746948	0.197369	0.110142	0.153903	0.083247	0.0540534	0.123787	0.161655	0.133416	0.206557
0.631	NaN	NaN	0.0738413	0.102811	0.0650052	0.0749569	0.0624711	0.0457671	0.0831452	0.0919841	0.0980318	0.138835			0.631	NaN	NaN	0.0970504	0.116735	0.0687912	0.26893	0.0759222	0.0561521	0.1099	0.163178	0.127098	0.171628
0.632	NaN	NaN	0.0707921	0.125867	0.0928734	0.0622641	0.051566	0.0590945	0.0644559	0.111026	0.0946703	0.145086			0.632	NaN	NaN	0.10963	0.191056	0.104339	0.158079	0.0776499	0.0721728	0.134724	0.16788	0.131023	0.192571
0.633	NaN	NaN	0.0867401	0.078737	0.0867274	0.0578171	0.0628684	0.0627107	0.0664475	0.0429354	0.104018	0.137837			0.633	NaN	NaN	0.0915989	0.241452	0.10528	0.166746	0.0715829	0.070885	0.10507	0.131057	0.105479	0.154789
0.634	NaN	NaN	0.0530846	0.0904957	0.085071	0.0576671	0.0542881	0.059869	0.062305	0.0612649	0.0831988	0.137089			0.634	NaN	NaN	0.0342881	0.215293	0.0818432	0.173083	0.0826934	0.0807263	0.0855423	0.115785	0.148505	0.145395
0.635	NaN	NaN	0.0664198	0.085268	0.102422	0.0474112	0.0584812	0.0442761	0.0412602	0.0533995	0.0867269	0.174455			0.635	NaN	NaN	0.0866336	0.174448	0.0867162	0.153149	0.0701607	0.0976982	0.0950183	0.128534	0.118571	0.154974
0.636	NaN	NaN	0.0720196	0.0976616	0.100896	0.0707816	0.0570083	0.0515621	0.0564477	0.0562876	0.0788788	0.174294			0.636	NaN	NaN	0.0867625	0.183079	0.094223	0.17997	0.0728155	0.0819284	0.0880114	0.114882	0.141747	0.184389
0.637	NaN	NaN	0.140668	0.110519	0.0877085	0.050555	0.0570582	0.0511291	0.0791943	0.0681111	0.102215	0.14372			0.637	NaN	NaN	0.106141	0.213508	0.123295	0.179655	0.0740365	0.0933476	0.113698	0.139854	0.147359	0.144796
0.638	NaN	NaN	0.0976029	0.0983227	0.105276	0.0551682	0.0482833	0.0556338	0.0675324	0.0767512	0.0851988	0.136045			0.638	NaN	NaN	0.096784	0.196464	0.10488	0.152049	0.0901422	0.0667972	0.102707	0.142286	0.158901	0.147925
0.639	NaN	NaN	0.0978125	0.100715	0.0919169	0.0247392	0.0508167	0.0696412	0.0655824	0.0821142	0.102787	0.166063			0.639	NaN	NaN	0.112845	0.150496	0.113249	0.0736729	0.0761179	0.0631359	0.105934	0.148973	0.152757	0.115039
0.64	NaN	NaN	0.0697902	0.117951	0.0711926	0.105455	0.0536665	0.0764966	0.0723717	0.104727	0.108717	0.140382			0.64	NaN	NaN	0.0871089	0.172715	0.0930962	0.194845	0.0900078	0.093165	0.0905646	0.146046	0.148785	0.147482
0.641	NaN	NaN	0.0811152	0.127934	0.091897	0.0743732	0.0570356	0.0584305	0.0838528	0.099942	0.119407	0.143229			0.641	NaN	NaN	0.0828315	0.179793	0.0901205	0.188962	0.0820779	0.0718266	0.111887	0.167948	0.158357	0.173509
0.642	NaN	NaN	0.0666473	0.0859868	0.0775524	0.0642328	0.0498385	0.0601967	0.0745497	0.111239	0.0979603	0.145334			0.642	NaN	NaN	0.0880974	0.094679	0.0982271	0.177513	0.0754385	0.0738638	0.0941169	0.10755	0.118065	0.134843
0.643	NaN	NaN	0.0640149	0.131018	0.0688954	0.0729779	0.0453023	0.05888	0.0583152	0.0830028	0.103376	0.140587			0.643	NaN	NaN	0.0918631	0.161809	0.083738	0.16592	0.0699746	0.0694483	0.0982214	0.0973989	0.14362	0.175515
0.644	NaN	NaN	0.0791384	0.128162	0.0803907	0.0671922	0.0563466	0.0624515	0.0707777	0.0564529	0.0984918	0.128795			0.644	NaN	NaN	0.111217	0.183533	0.105335	0.157273	0.0837039	0.0830488	0.0886882	0.139502	0.139213	0.150402
0.645	NaN	NaN	0.0741876	0.109696	0.0639431	0.0798618	0.0544827	0.0589848	0.0468429	0.0605959	0.100383	0.148232			0.645	NaN	NaN	0.0974988	0.142812	0.0986807	0.154192	0.075414	0.0777004	0.102323	0.102883	0.153475	0.13154
0.646	NaN	NaN	0.0910168	0.103474	0.077771	0.0482844	0.0518546	0.0646045	0.0430021	0.0703687	0.0960839	0.148488			0.646	NaN	NaN	0.0700891	0.157439	0.0964162	0.158187	0.0867778	0.0510576	0.105924	0.106535	0.15582	0.163251
0.647	NaN	NaN	0.0733153	0.114306	0.10294	0.0624183	0.0510988	0.0537937	0.0563087	0.0893599	0.109056	0.102294			0.647	NaN	NaN	0.0866568	0.167702	0.103482	0.143448	0.0703664	0.0735748	0.117821	0.12464	0.182414	0.105255
0.648	NaN	NaN	0.112329	0.0666695	0.096066	0.0721621	0.0468577	0.055743	0.0795105	0.0825228	0.10082	0.162631			0.648	NaN	NaN	0.113833	0.178333	0.0904521	0.136601	0.0731982	0.071902	0.0789361	0.126803	0.143947	0.146727
0.649	NaN	NaN	0.0699825	0.0946558	0.0636308	0.0876955	0.0519051	0.0567838	0.0650936	0.10195	0.106347	0.142051			0.649	NaN	NaN	0.0468509	0.143895	0.100287	0.206268	0.0746845	0.096768	0.104747	0.138111	0.168199	0.125813
0.65	NaN	NaN	0.082698	0.0979496	0.0725882	0.0623397	0.0513009	0.0319598	0.0725131	0.0752635	0.0876201	0.111329			0.65	NaN	NaN	0.0895721	0.180691	0.0684457	0.169938	0.0745675	0.0634435	0.106213	0.110169	0.132972	0.160193
0.651	NaN	NaN	0.0804799	0.12632	0.0699716	0.0733188	0.057547	0.0611149	0.0878601	0.0574795	0.106631	0.130925			0.651	NaN	NaN	0.0774204	0.172854	0.0959869	0.178723	0.0803286	0.0808161	0.098906	0.134254	0.12614	0.174915
0.652	NaN	NaN	0.0822675	0.123256	0.0834018	0.0620421	0.0533528	0.0674942	0.0566748	0.0840226	0.104398	0.1258			0.652	NaN	NaN	0.0900674	0.229286	0.0964058	0.183652	0.0834808	0.0790888	0.0619337	0.0918649	0.123281	0.15995
0.653	NaN	NaN	0.0933669	0.104509	0.0815323	0.0481986	0.0503654	0.0457385	0.0691635	0.0599252	0.0866263	0.118439			0.653	NaN	NaN	0.0827514	0.155039	0.0980305	0.159933	0.0772739	0.0724444	0.0830005	0.109092	0.122291	0.173217
0.654	NaN	NaN	0.0825135	0.0868142	0.0833308	0.0536509	0.0537631	0.052313	0.0668473	0.115055	0.0926956	0.113071			0.654	NaN	NaN	0.0702534	0.168213	0.0902599	0.149507	0.0723809	0.0767349	0.0936585	0.153895	0.126403	0.196653
0.655	NaN	NaN	0.0819397	0.117627	0.0793021	0.061176	0.0468833	0.0503459	0.0751465	0.0744024	0.080593	0.0767044			0.655	NaN	NaN	0.0804382	0.142465	0.0914463	0.153048	0.0715992	0.0834245	0.107428	0.111104	0.132366	0.158651
0.656	NaN	NaN	0.0893408	0.10854	0.0923856	0.0765278	0.0490583	0.0538647	0.0486701	0.0519448	0.0854573	0.139228			0.656	NaN	NaN	0.0924793	0.181176	0.092555	0.177244	0.066536	0.0698575	0.0887179	0.137678	0.150724	0.187753
0.657	NaN	NaN	0.0930414	0.108551	0.0812644	0.0657285	0.0490606	0.0361787	0.0377162	0.0646346	0.0711908	0.110505			0.657	NaN	NaN	0.0955121	0.179927	0.0965114	0.165459	0.0724831	0.0745611	0.121437	0.0988891	0.135281	0.146332
0.658	NaN	NaN	0.0890537	0.115747	0.0784626	0.0762251	0.0494182	0.0568098	0.0644327	0.0626773	0.0820298	0.123593			0.658	NaN	NaN	0.0664467	0.163443	0.0850455	0.204667	0.0999698	0.0912161	0.122511	0.134471	0.140745	0.132226
0.659	NaN	NaN	0.0896861	0.108307	0.0797673	0.0793908	0.0484065	0.0539309	0.0473349	0.100533	0.0735346	0.123975			0.659	NaN	NaN	0.0561472	0.176132	0.0939993	0.165777	0.0745726	0.0681252	0.104333	0.110686	0.141184	0.160786
0.66	NaN	NaN	0.0677002	0.0883966	0.0830089	0.0629738	0.0514807	0.0675121	0.0565053	0.0978233	0.0918948	0.114386			0.66	NaN	NaN	0.0831487	0.160779	0.108813	0.179407	0.0758623	0.0711242	0.116323	0.0749158	0.133051	0.160501
0.661	NaN	NaN	0.0473398	0.0920414	0.0721162	0.0564521	0.0490701	0.0550974	0.0521288	0.110177	0.0718553	0.136269			0.661	NaN	NaN	0.116957	0.117188	0.106384	0.160827	0.0699035	0.0679008	0.0892646	0.100287	0.103887	0.142962
0.662	NaN	NaN	0.075916	0.116036	0.0745095	0.0629137	0.0463963	0.0471343	0.057886	0.0905342	0.10327	0.131887			0.662	NaN	NaN	0.0994356	0.101544	0.07474	0.165365	0.0669691	0.0632575	0.102227	0.0926383	0.140381	0.107556
0.663	NaN	NaN	0.0781251	0.101113	0.0744671	0.045387	0.0462105	0.0554794	0.0783712	0.0918727	0.0874294	0.100931			0.663	NaN	NaN	0.0965952	0.139174	0.110163	0.129191	0.0663275	0.0726383	0.0726892	0.102873	0.112298	0.162257
0.664	NaN	NaN	0.0509954	0.123863	0.0668145	0.0550438	0.0609082	0.0562699	0.0563285	0.0826478	0.0709748	0.113765			0.664	NaN	NaN	0.0980052	0.129023	0.0996332	0.12673	0.0719392	0.0790384	0.0656781	0.0873998	0.131536	0.134412
0.665	NaN	NaN	0.0435198	0.11531	0.0783841	0.0476057	0.0580921	0.0525157	0.0926537	0.0740793	0.0747549	0.137833			0.665	NaN	NaN	0.0580914	0.137656	0.103611	0.153469	0.0735134	0.0728915	0.0917652	0.102482	0.119049	0.169041
0.666	NaN	NaN	0.0677793	0.0800615	0.0907522	0.0726313	0.0616991	0.0380956	0.0808938	0.0822442	0.0669112	0.136769			0.666	NaN	NaN	0.0868489	0.169824	0.105498	0.199273	0.0642423	0.0764311	0.0768922	0.0591626	0.125887	0.189473
0.667	NaN	NaN	0.0683531	0.113323	0.0868006	0.0546633	0.057284	0.0499883	0.0851779	0.0904887	0.0767498	0.134709			0.667	NaN	NaN	0.0749039	0.15981	0.116025	0.142518	0.0665104	0.0840241	0.0976885	0.070907	0.104234	0.14511
0.668	NaN	NaN	0.0799151	0.0996102	0.081261	0.0653047	0.0488631	0.0417139	0.0546979	0.0970089	0.08767	0.128241			0.668	NaN	NaN	0.084363	0.1737	0.111688	0.174786	0.0663557	0.0911317	0.106404	0.11138	0.121171	0.209372
0.669	NaN	NaN	0.108995	0.126757	0.0636444	0.0702674	0.055077	0.0600095	0.0678348	0.112412	0.0831547	0.145506			0.669	NaN	NaN	0.129985	0.14872	0.099044	0.168593	0.0740027	0.0801465	0.116638	0.0638558	0.133515	0.190427
0.67	NaN	NaN	0.0835679	0.117671	0.0761876	0.0669227	0.0522837	0.0580452	0.0562426	0.130954	0.0867647	0.130805			0.67	NaN	NaN	0.0834893	0.170956	0.123211	0.184749	0.075475	0.0798648	0.135103	0.0879251	0.120196	0.159048
0.671	NaN	NaN	0.0836681	0.116262	0.0824476	0.0536332	0.0416794	0.0578119	0.0792325	0.112473	0.0863566	0.129987			0.671	NaN	NaN	0.10772	0.201749	0.0959835	0.169884	0.0681485	0.0748559	0.0940892	0.100254	0.135182	0.166968
0.672	NaN	NaN	0.0867538	0.107547	0.0788686	0.0660596	0.0429581	0.0478703	0.0773279	0.110975	0.103263	0.12813			0.672	NaN	NaN	0.08949	0.137251	0.0952502	0.180118	0.0596265	0.0884194	0.105556	0.0870208	0.113743	0.187302
0.673	NaN	NaN	0.0655589	0.114591	0.0599791	0.0446078	0.0448327	0.0419574	0.0872719	0.0996473	0.0982505	0.145539			0.673	NaN	NaN	0.0770684	0.0910413	0.110201	0.10354	0.0746541	0.0494301	0.102789	0.107997	0.103981	0.158077
0.674	NaN	NaN	0.0695054	0.102356	0.070367	0.0551136	0.0504823	0.055012	0.0584709	0.0710843	0.096198	0.144622			0.674	NaN	NaN	0.0901485	0.101979	0.0886269	0.169552	0.059741	0.0761223	0.077476	0.112778	0.0922996	0.149323
0.675	NaN	NaN	0.0754264	0.0596023	0.0710567	0.0563402	0.0421781	0.0493567	0.0677764	0.0650288	0.108009	0.144534			0.675	NaN	NaN	0.10482	0.163201	0.0682953	0.272927	0.0768111	0.0744208	0.0916329	0.11753	0.122393	0.169525
0.676	NaN	NaN	0.0607173	0.0838336	0.0840016	0.0551285	0.0449498	0.0369809	0.0645688	0.0823625	0.0974622	0.152475			0.676	NaN	NaN	0.108547	0.140761	0.12582	0.165338	0.0546736	0.055922	0.0704676	0.155513	0.153713	0.158947
0.677	NaN	NaN	0.0453819	0.0789739	0.065838	0.0582225	0.0500879	0.0588472	0.0655325	0.0953484	0.0784314	0.106583			0.677	NaN	NaN	0.0736422	0.133596	0.0937692	0.152604	0.0911345	0.0822148	0.0805033	0.11267	0.134154	0.149822
0.678	NaN	NaN	0.0812245	0.0982052	0.0856698	0.0643351	0.0513386	0.0435675	0.0772922	0.0933564	0.087718	0.0938353			0.678	NaN	NaN	0.0670604	0.109109	0.0857838	0.158202	0.0831318	0.0961249	0.0763569	0.0909291	0.127497	0.184688
0.679	NaN	NaN	0.0878309	0.110073	0.0859521	0.0812339	0.0537439	0.0351615	0.0642285	0.0979249	0.0902207	0.0967569			0.679	NaN	NaN	0.0795455	0.146538	0.105911	0.159182	0.0644446	0.0739642	0.0977325	0.104864	0.142963	0.174219
0.68	NaN	NaN	0.11483	0.0796007	0.0899106	0.0556479	0.0391257	0.053534	0.0762692	0.108485	0.0846011	0.134584			0.68	NaN	NaN	0.159212	0.150147	0.0955763	0.159477	0.0681233	0.0740938	0.132772	0.0966147	0.138958	0.187585
0.681	NaN	NaN	0.0489399	0.0904493	0.0594272	0.0619666	0.032755	0.0596578	0.069089	0.0907509	0.0913371	0.148919			0.681	NaN	NaN	0.035911	0.165445	0.0820268	0.174314	0.078476	0.0755022	0.126349	0.096262	0.120559	0.160508
0.682	NaN	NaN	0.0575905	0.0544756	0.0882009	0.0595828	0.0404806	0.0337032	0.0691853	0.107383	0.0986507	0.143921			0.682	NaN	NaN	0.106085	0.19131	0.108823	0.184105	0.0725815	0.0752013	0.1189	0.11126	0.135184	0.146586
0.683	NaN	NaN	0.0717736	0.0614756	0.0587347	0.0563608	0.0404445	0.0349632	0.0747106	0.124485	0.102823	0.136904			0.683	NaN	NaN	0.107727	0.119159	0.103136	0.171449	0.0679287	0.0681367	0.108372	0.109257	0.125856	0.133218
0.684	NaN	NaN	0.0809354	0.0910169	0.0711675	0.0665762	0.0501221	0.0490303	0.0791155	0.0645833	0.0798378	0.151775			0.684	NaN	NaN	0.108267	0.118716	0.104761	0.210136	0.0637896	0.0630725	0.0941834	0.108942	0.13011	0.120858
0.685	NaN	NaN	0.0615144	0.0933941	0.0745525	0.0648943	0.0502378	0.0389538	0.0575418	0.069864	0.0601317	0.147328			0.685	NaN	NaN	0.0993276	0.154931	0.108714	0.170475	0.0619061	0.0709741	0.112355	0.0881235	0.13543	0.143765
0.686	NaN	NaN	0.0630106	0.0914776	0.0673618	0.0641439	0.0430524	0.0534849	0.0583333	0.0721796	0.0804508	0.173079			0.686	NaN	NaN	0.10308	0.14835	0.130282	0.157324	0.0548352	0.0988397	0.0863389	0.0977743	0.131123	0.178352
0.687	NaN	NaN	0.0826568	0.0913723	0.0654108	0.0613667	0.0443419	0.0468566	0.0471352	0.096714	0.0850414	0.129536			0.687	NaN	NaN	0.0784309	0.13326	0.126116	0.168311	0.0551695	0.0756605	0.0673478	0.0987606	0.110135	0.126231
0.688	NaN	NaN	0.057652	0.104926	0.0484049	0.0633319	0.0394409	0.036636	0.0610469	0.100262	0.0728191	0.177413			0.688	NaN	NaN	0.0762333	0.143704	0.0908248	0.150878	0.0663913	0.0722243	0.0877011	0.0748226	0.130191	0.2131
0.689	NaN	NaN	0.060977	0.0469224	0.0681753	0.0370255	0.0410981	0.0367302	0.0750874	0.0799332	0.0720529	0.140383			0.689	NaN	NaN	0.0705117	0.148792	0.123711	0.137392	0.072699	0.070585	0.0859644	0.0591952	0.120327	0.217303
0.69	NaN	NaN	0.0477116	0.12859	0.0665781	0.0459757	0.0445456	0.0487627	0.0671293	0.130543	0.0922503	0.162882			0.69	NaN	NaN	0.0652187	0.181757	0.101168	0.151117	0.0671658	0.0599565	0.100304	0.0892567	0.1268	0.184169
0.691	NaN	NaN	0.0448163	0.0786048	0.0828391	0.0513658	0.0474762	0.0610186	0.0733021	0.117605	0.0762112	0.144971			0.691	NaN	NaN	0.164876	0.159352	0.101258	0.152437	0.0748314	0.0866068	0.0781941	0.123884	0.127029	0.150612
0.692	NaN	NaN	0.0705688	0.0802373	0.0575673	0.0768219	0.0510377	0.0398818	0.0930916	0.104296	0.0945822	0.179194			0.692	NaN	NaN	0.0581885	0.159381	0.0900957	0.180831	0.0675014	0.0796161	0.108356	0.0992105	0.131152	0.144163
0.693	NaN	NaN	0.0647914	0.0926846	0.0619558	0.0689515	0.0527737	0.0519034	0.0774893	0.105611	0.0876773	0.170577			0.693	NaN	NaN	0.0512333	0.152796	0.097571	0.166614	0.0608553	0.0882548	0.105575	0.102865	0.149051	0.145748
0.694	NaN	NaN	0.0747284	0.108965	0.0686627	0.0570946	0.0495104	0.0468254	0.0663849	0.115796	0.0884928	0.153049			0.694	NaN	NaN	0.0633567	0.163644	0.0726652	0.148922	0.0602825	0.0881453	0.137871	0.131122	0.161222	0.132353
0.695	NaN	NaN	0.0962691	0.105377	0.0964742	0.0708042	0.038916	0.0535727	0.0539081	0.0800364	0.0863423	0.1854			0.695	NaN	NaN	0.0800645	0.181915	0.128697	0.1578	0.0618275	0.0753805	0.115173	0.0911912	0.181293	0.155512
0.696	NaN	NaN	0.0508529	0.0891173	0.0670861	0.0659156	0.0400693	0.0473645	0.0611279	0.107994	0.0772047	0.213906			0.696	NaN	NaN	0.0577608	0.143585	0.0985693	0.164267	0.0749601	0.0828267	0.103218	0.0542789	0.148454	0.160817
0.697	NaN	NaN	0.0546701	0.0988259	0.0808189	0.051328	0.0507535	0.035807	0.090193	0.0952227	0.066603	0.111112			0.697	NaN	NaN	0.0995197	0.159614	0.102421	0.152449	0.0609352	0.0727874	0.0821761	0.0989563	0.151933	0.1239
0.698	NaN	NaN	0.0668365	0.0698603	0.0809596	0.0474208	0.0409294	0.056518	0.0805126	0.161142	0.0639743	0.15809			0.698	NaN	NaN	0.0966288	0.136383	0.102749	0.13683	0.0842753	0.0609738	0.0753438	0.0722342	0.126398	0.179743
0.699	NaN	NaN	0.0832216	0.0841195	0.081735	0.038186	0.0350485	0.059509	0.0893049	0.106215	0.0822252	0.138593			0.699	NaN	NaN	0.0936707	0.173622	0.120655	0.150353	0.0568033	0.0744693	0.0766414	0.0795363	0.0854995	0.133093
0.7	NaN	NaN	0.0539377	0.109468	0.0600784	0.0680978	0.034075	0.0454485	0.0828525	0.128502	0.0885191	0.162705			0.7	NaN	NaN	0.10123	0.164513	0.0990062	0.141653	0.0606546	0.0592904	0.0994811	0.071439	0.0534369	0.165609
0.701	NaN	NaN	0.0767638	0.0969675	0.0764673	0.0937884	0.04064	0.0601109	0.0820345	0.0980133	0.093843	0.157281			0.701	NaN	NaN	0.0916057	0.164154	0.092369	0.209943	0.0698878	0.0784401	0.0741121	0.0795543	0.0649157	0.160862
0.702	NaN	NaN	0.066765	0.0966965	0.0734578	0.0687597	0.0379165	0.0593313	0.0696638	0.101093	0.0993276	0.12839			0.702	NaN	NaN	0.139983	0.168421	0.0830099	0.148662	0.0552416	0.0857843	0.0825985	0.106052	0.0908827	0.185445
0.703	NaN	NaN	0.0574288	0.0914805	0.0815113	0.0725982	0.0474056	0.0581686	0.0830294	0.107974	0.0985557	0.142804			0.703	NaN	NaN	0.0816865	0.180331	0.082859	0.155487	0.0562332	0.0653269	0.0953981	0.0722395	0.0982227	0.170258
0.704	NaN	NaN	0.0746914	0.0843195	0.0679506	0.0733477	0.0424825	0.0720058	0.0763491	0.139783	0.0929563	0.158462			0.704	NaN	NaN	0.0878105	0.057483	0.111599	0.165929	0.0646501	0.0539093	0.101783	0.103982	0.104533	0.142061
0.705	NaN	NaN	0.0691866	0.102009	0.0729547	0.0500372	0.0500256	0.0663393	0.0748062	0.150592	0.114266	0.124945			0.705	NaN	NaN	0.0927662	0.154793	0.110154	0.164579	0.0731219	0.0669831	0.135921	0.112936	0.134447	0.143618
0.706	NaN	NaN	0.0676426	0.0940235	0.062389	0.0758794	0.0407852	0.0638002	0.056512	0.101284	0.111677	0.123603			0.706	NaN	NaN	0.0878139	0.149586	0.0887903	0.165716	0.0587352	0.0644568	0.128378	0.104083	0.12795	0.130344
0.707	NaN	NaN	0.0911171	0.0912934	0.0680919	0.0621908	0.0483308	0.051085	0.0766531	0.124628	0.127037	0.155049			0.707	NaN	NaN	0.0790262	0.161338	0.0532091	0.150823	0.070267	0.0572469	0.108995	0.0721985	0.137157	0.134498
0.708	NaN	NaN	0.112135	0.0968315	0.0734435	0.0389583	0.0444392	0.0479702	0.0923636	0.112995	0.136186	0.159602			0.708	NaN	NaN	0.0791909	0.166453	0.090596	0.10495	0.0705183	0.0663099	0.0784969	0.0994832	0.118913	0.167001
0.709	NaN	NaN	0.0859089	0.125436	0.0616042	0.0833106	0.0452846	0.0418016	0.107406	0.140415	0.131796	0.160693			0.709	NaN	NaN	0.0975285	0.241203	0.102075	0.13062	0.0796932	0.044387	0.0740634	0.0760585	0.109087	0.154724
0.71	NaN	NaN	0.0727665	0.108859	0.0908287	0.0905029	0.043225	0.0591366	0.0973353	0.140587	0.124354	0.15801			0.71	NaN	NaN	0.100331	0.179942	0.0795912	0.165147	0.0671322	0.0579108	0.0808562	0.0897115	0.123379	0.176335
0.711	NaN	NaN	0.0587906	0.087175	0.0827376	0.0679148	0.0379455	0.0614414	0.0974823	0.10735	0.11906	0.143477			0.711	NaN	NaN	0.0999651	0.171417	0.0952533	0.124574	0.06918	0.0571699	0.0829306	0.0755374	0.10254	0.136277
0.712	NaN	NaN	0.0486211	0.0868149	0.0771595	0.0390515	0.0361837	0.0548068	0.0802383	0.12589	0.133343	0.135766			0.712	NaN	NaN	0.0442061	0.145955	0.0975765	0.131261	0.0769077	0.0618949	0.0855386	0.0987433	0.110432	0.172142
0.713	NaN	NaN	0.079823	0.0818194	0.0622392	0.0474307	0.0403312	0.0498288	0.0894292	0.128579	0.113533	0.0947443			0.713	NaN	NaN	0.111821	0.147433	0.0701344	0.134336	0.0758335	0.0645702	0.0812373	0.116903	0.101112	0.258262
0.714	NaN	NaN	0.0592211	0.117273	0.0654121	0.0577205	0.0425906	0.0603564	0.0846482	0.106591	0.147071	0.123947			0.714	NaN	NaN	0.0695165	0.163302	0.0926229	0.131405	0.0760669	0.0748887	0.0869729	0.093484	0.110063	0.154719
0.715	NaN	NaN	0.0552358	0.170236	0.0636944	0.0631413	0.0401016	0.0505239	0.101911	0.108308	0.135662	0.169977			0.715	NaN	NaN	0.0684436	0.103796	0.0930363	0.127733	0.064963	0.0532924	0.100538	0.10484	0.125667	0.166122
0.716	NaN	NaN	0.0619288	0.111796	0.0646877	0.0423409	0.0423876	0.0471625	0.081047	0.115924	0.144095	0.200427			0.716	NaN	NaN	0.0979427	0.206882	0.0829789	0.140982	0.0516077	0.0606193	0.107845	0.116391	0.130667	0.143606
0.717	NaN	NaN	0.095182	0.078062	0.0623983	0.0677847	0.0399607	0.060572	0.0967243	0.122431	0.1164	0.180465			0.717	NaN	NaN	0.0666322	0.161995	0.111291	0.15762	0.0563964	0.0728916	0.122771	0.078691	0.138314	0.165354
0.718	NaN	NaN	0.0714638	0.0604915	0.0450551	0.0808809	0.0479334	0.058606	0.105104	0.136434	0.114235	0.136205			0.718	NaN	NaN	0.0928701	0.151083	0.0695702	0.287526	0.0642331	0.0804477	0.118535	0.0812211	0.130256	0.158317
0.719	NaN	NaN	0.0582873	0.0824517	0.0537644	0.0602029	0.0522805	0.0623947	0.105759	0.134448	0.142058	0.165419			0.719	NaN	NaN	0.0615985	0.196693	0.0580933	0.145563	0.0717159	0.0761712	0.12163	0.0966004	0.146422	0.143193
0.72	NaN	NaN	0.0731194	0.0980515	0.0714799	0.0557415	0.0535054	0.0658551	0.0978247	0.141906	0.133641	0.133242			0.72	NaN	NaN	0.0830115	0.156522	0.103095	0.134746	0.0669472	0.0721242	0.0765329	0.0809865	0.120199	0.215089
0.721	NaN	NaN	0.0623665	0.088263	0.0548985	0.0506444	0.0438489	0.0297094	0.109835	0.120843	0.140871	0.127233			0.721	NaN	NaN	0.0870482	0.156254	0.0778638	0.12555	0.0559237	0.0514445	0.0592675	0.070776	0.0965178	0.165077
0.722	NaN	NaN	0.0630269	0.0984168	0.0602997	0.0460398	0.0466537	0.045119	0.0994132	0.13113	0.150699	0.185417			0.722	NaN	NaN	0.0773056	0.153407	0.0893633	0.129872	0.0692282	0.08112	0.0958025	0.108427	0.12366	0.229057
0.723	NaN	NaN	0.0486627	0.11557	0.0517816	0.0436561	0.0364046	0.0577231	0.115771	0.151152	0.162773	0.174924			0.723	NaN	NaN	0.075365	0.152091	0.0928795	0.121217	0.0708063	0.075414	0.0991193	0.0914786	0.120229	0.217477
0.724	NaN	NaN	0.022312	0.0938887	0.0723936	0.0332072	0.0477345	0.0641149	0.0902526	0.159427	0.140565	0.130835			0.724	NaN	NaN	0.119986	0.139221	0.118312	0.121485	0.0628325	0.0817781	0.108222	0.0625041	0.102656	0.17413
0.725	NaN	NaN	0.0756105	0.147704	0.0522943	0.049454	0.0444347	0.0690081	0.0804311	0.134926	0.159556	0.165232			0.725	NaN	NaN	0.0819185	0.120245	0.0846628	0.12602	0.0704321	0.0818775	0.0806488	0.0957635	0.0803866	0.213916
0.726	NaN	NaN	0.0709103	0.0713576	0.0709462	0.0443949	0.0333142	0.0705627	0.124217	0.163756	0.199569	0.225859			0.726	NaN	NaN	0.0546386	0.148835	0.0823994	0.128367	0.0585703	0.0749058	0.0980579	0.0802775	0.108001	0.207893
0.727	NaN	NaN	0.0728775	0.0547344	0.0492797	0.0856402	0.047073	0.0689219	0.107625	0.179069	0.16352	0.211429			0.727	NaN	NaN	0.0522241	0.175742	0.0815587	0.159007	0.0686275	0.0683784	0.113283	0.118925	0.128212	0.202645
0.728	NaN	NaN	0.0521282	0.0640717	0.04773	0.0527484	0.0444096	0.0524722	0.101022	0.152437	0.180604	0.118135			0.728	NaN	NaN	0.0442061	0.161825	0.0795246	0.113297	0.045442	0.08792	0.143854	0.113235	0.147502	0.178957
0.729	NaN	NaN	0.0673699	0.105825	0.0728749	0.0710598	0.0475587	0.0439931	0.118023	0.180101	0.177746	0.130658			0.729	NaN	NaN	0.0587028	0.149211	0.0735659	0.124781	0.0571681	0.0871299	0.114848	0.0729196	0.124548	0.198627
0.73	NaN	NaN	0.0358074	0.0908954	0.0744911	0.0564079	0.0515603	0.0598776	0.0954853	0.152786	0.179787	0.217754			0.73	NaN	NaN	0.0569262	0.14788	0.0649988	0.159603	0.0502843	0.0990576	0.0833275	0.103018	0.153543	0.196397
0.731	NaN	NaN	0.0603284	0.0664922	0.0635855	0.0697441	0.0465441	0.0761185	0.142239	0.156481	0.189049	0.191434			0.731	NaN	NaN	0.0703579	0.137132	0.0882421	0.140823	0.066503	0.0998035	0.10442	0.106363	0.126467	0.206005
0.732	NaN	NaN	0.0745154	0.0610071	0.0504486	0.0680154	0.0393695	0.0479447	0.129788	0.16716	0.169171	0.176274			0.732	NaN	NaN	0.0725268	0.141873	0.0853036	0.0997339	0.0715053	0.0784307	0.121469	0.0987279	0.152093	0.168345
0.733	NaN	NaN	0.0850343	0.0543827	0.0591201	0.0617117	0.0345043	0.055839	0.142231	0.162449	0.195096	0.188318			0.733	NaN	NaN	0.0667759	0.161909	0.084322	0.09136	0.0687553	0.0615891	0.0787564	0.0706146	0.13735	0.159511
0.734	NaN	NaN	0.0497064	0.10225	0.0712407	0.0453982	0.0401191	0.0641943	0.141112	0.166683	0.192119	0.208199			0.734	NaN	NaN	0.0718107	0.169357	0.080801	0.0958182	0.049702	0.0632999	0.106883	0.0381606	0.119348	0.171264
0.735	NaN	NaN	0.0756556	0.0723836	0.0553268	0.045365	0.0478219	0.0660527	0.123635	0.176647	0.170242	0.210194			0.735	NaN	NaN	0.076914	0.0907159	0.0929944	0.0937356	0.0659303	0.0716829	0.0912257	0.104191	0.114712	0.207991
0.736	NaN	NaN	0.0635366	0.0924083	0.0615315	0.0635398	0.0523249	0.0612814	0.126285	0.179848	0.187681	0.125582			0.736	NaN	NaN	0.0485606	0.143324	0.0814396	0.13013	0.0732252	0.0489445	0.11555	0.0705812	0.0835341	0.170665
0.737	NaN	NaN	0.0725069	0.112876	0.0489337	0.0550646	0.0465969	0.0740346	0.139902	0.181602	0.194225	0.221537			0.737	NaN	NaN	0.0673951	0.128508	0.0779234	0.090879	0.0665305	0.0707833	0.0886831	0.079817	0.117243	0.184013
0.738	NaN	NaN	0.0890561	0.0724691	0.0498291	0.0329954	0.0432322	0.0715089	0.140776	0.187296	0.190202	0.284303			0.738	NaN	NaN	0.0800788	0.164468	0.0853106	0.061189	0.054444	0.0987669	0.0827264	0.0867269	0.109055	0.219771
0.739	NaN	NaN	0.0852051	0.0917111	0.0285709	0.0460299	0.0559213	0.0751767	0.125187	0.185299	0.193332	0.223862			0.739	NaN	NaN	0.0872776	0.155679	0.0983125	0.0903689	0.0561213	0.0883064	0.0992243	0.0664652	0.124025	0.191211
0.74	NaN	NaN	0.0737822	0.0509197	0.0514094	0.0447786	0.0537981	0.0624479	0.158139	0.178375	0.230171	0.230804			0.74	NaN	NaN	0.0711333	0.140337	0.0968424	0.107047	0.058526	0.0849101	0.101436	0.105799	0.168057	0.205385
0.741	NaN	NaN	0.0768451	0.0688843	0.0721369	0.0667757	0.0562684	0.0686832	0.145644	0.166677	0.184978	0.214584			0.741	NaN	NaN	0.0704	0.149781	0.0955972	0.104871	0.0562129	0.0761577	0.108167	0.0851568	0.124839	0.210741
0.742	NaN	NaN	0.067663	0.0625557	0.0471518	0.0566667	0.0528965	0.0615202	0.149463	0.19535	0.187046	0.213999			0.742	NaN	NaN	0.0648411	0.163045	0.0961789	0.08561	0.0582338	0.0635887	0.107843	0.169148	0.132724	0.211308
0.743	NaN	NaN	0.0272597	0.0725291	0.0547886	0.0598499	0.0446599	0.0716767	0.139698	0.186528	0.21284	0.16985			0.743	NaN	NaN	0.0514794	0.175089	0.0802599	0.0879178	0.0494213	0.069127	0.125052	0.141103	0.113613	0.262742
0.744	NaN	NaN	0.0406359	0.0575273	0.0639768	0.0643464	0.0471557	0.081352	0.136115	0.198767	0.213447	0.187162			0.744	NaN	NaN	0.0789688	0.159815	0.0980027	0.105539	0.0551976	0.101444	0.117947	0.123805	0.156917	0.212928
0.745	NaN	NaN	0.0565384	0.0750952	0.0405163	0.0578558	0.0543495	0.0729251	0.213961	0.191586	0.245927	0.231176			0.745	NaN	NaN	0.0627694	0.135722	0.0796122	0.083031	0.062854	0.0985114	0.0972394	0.106557	0.139356	0.21481
0.746	NaN	NaN	0.110315	0.0772497	0.0600317	0.0389244	0.0534488	0.0717845	0.143489	0.208585	0.227613	0.273538			0.746	NaN	NaN	0.07153	0.216978	0.0815296	0.0989804	0.0593172	0.101318	0.101637	0.0725132	0.115471	0.188027
0.747	NaN	NaN	0.0475566	0.0665823	0.0614631	0.0516379	0.0513541	0.07398	0.144893	0.215127	0.218061	0.232078			0.747	NaN	NaN	0.040225	0.174956	0.0670223	0.0947214	0.0556175	0.080049	0.0903174	0.0745199	0.10784	0.215851
0.748	NaN	NaN	0.0581268	0.0627333	0.0467759	0.0452332	0.041685	0.074952	0.169532	0.203045	0.233689	0.224718			0.748	NaN	NaN	0.0619334	0.184275	0.07869	0.0739102	0.049485	0.0893078	0.102306	0.0969353	0.10479	0.22269
0.749	NaN	NaN	0.0384844	0.0799765	0.0571848	0.0574205	0.0467992	0.0719201	0.15056	0.205968	0.239862	0.228627			0.749	NaN	NaN	0.0691579	0.152233	0.0668284	0.0962094	0.0594971	0.0772589	0.0885688	0.111735	0.107097	0.198475
0.75	NaN	NaN	0.0633194	0.0757055	0.0455576	0.0719047	0.0441496	0.0703767	0.152499	0.20118	0.243469	0.264168			0.75	NaN	NaN	0.0528126	0.194176	0.0795998	0.096979	0.0539044	0.0738056	0.105384	0.103815	0.126549	0.212969
0.751	NaN	NaN	0.0577555	0.0978112	0.0469782	0.0615358	0.0530825	0.080823	0.160265	0.186111	0.24149	0.176208			0.751	NaN	NaN	0.0804497	0.161783	0.0603958	0.0819173	0.0484178	0.0800098	0.106717	0.0719072	0.105916	0.211996
0.752	NaN	NaN	0.0512391	0.0714204	0.0661488	0.0361828	0.0517109	0.0840834	0.164335	0.200226	0.239232	0.273492			0.752	NaN	NaN	0.0882741	0.199148	0.0771328	0.0722502	0.0477472	0.0670885	0.111596	0.0912185	0.149908	0.249978
0.753	NaN	NaN	0.0541184	0.0848622	0.0565243	0.0486565	0.0631223	0.0810643	0.15409	0.211217	0.270268	0.26036			0.753	NaN	NaN	0.0625934	0.165221	0.0830872	0.060605	0.0510184	0.062852	0.0838476	0.0840169	0.162862	0.248889
0.754	NaN	NaN	0.044701	0.0650921	0.0555367	0.060645	0.0645308	0.0920031	0.171181	0.189817	0.27209	0.259868			0.754	NaN	NaN	0.0634605	0.14732	0.0453289	0.0460678	0.0518691	0.0531766	0.134599	0.0868263	0.152949	0.262058
0.755	NaN	NaN	0.0420115	0.0707064	0.0585561	0.0595244	0.05646	0.0838907	0.165769	0.230999	0.288503	0.255666			0.755	NaN	NaN	0.0761079	0.154764	0.0756564	0.0517076	0.053209	0.0884876	0.140799	0.0940943	0.144022	0.254188
0.756	NaN	NaN	0.022312	0.0659841	0.0640769	0.0567124	0.0581954	0.0991347	0.179418	0.219416	0.279874	0.278503			0.756	NaN	NaN	0.13312	0.184889	0.0846851	0.0584503	0.052694	0.0782463	0.0960242	0.119204	0.138669	0.220614
0.757	NaN	NaN	0.0508725	0.0745899	0.0590808	0.0547823	0.0493047	0.10176	0.203594	0.263108	0.272164	0.239925			0.757	NaN	NaN	0.0456426	0.189848	0.0635011	0.0650883	0.057827	0.0646715	0.104175	0.0817282	0.125511	0.239352
0.758	NaN	NaN	0.052935	0.0706643	0.0567269	0.0488045	0.0543674	0.100155	0.170054	0.247814	0.260812	0.22458			0.758	NaN	NaN	0.0577034	0.144293	0.0748973	0.0794509	0.062317	0.0703701	0.0921746	0.0823772	0.117064	0.219361
0.759	NaN	NaN	0.050534	0.0793108	0.0523206	0.0576728	0.0507694	0.0826393	0.20337	0.205568	0.288573	0.178789			0.759	NaN	NaN	0.0213946	0.146567	0.0516674	0.0619707	0.0546291	0.0753678	0.109749	0.0927084	0.0968944	0.310877
0.76	NaN	NaN	0.0400757	0.0386577	0.0534937	0.0786579	0.0518768	0.0952126	0.203973	0.244589	0.277559	0.263485			0.76	NaN	NaN	0.0639956	0.140217	0.0655437	0.0875825	0.0586135	0.0823786	0.0867211	0.0957787	0.123362	0.233567
0.761	NaN	NaN	0.0499507	0.0789671	0.0534936	0.0615347	0.0530226	0.080392	0.190379	0.220035	0.285991	0.25002			0.761	NaN	NaN	0.050983	0.165152	0.0580055	0.0714522	0.0629113	0.0737938	0.104045	0.0867557	0.130081	0.276065
0.762	NaN	NaN	0.0671171	0.0399249	0.0501634	0.0839507	0.0567662	0.0804728	0.191841	0.222381	0.306893	0.281939			0.762	NaN	NaN	0.0371213	0.128911	0.0528252	0.135241	0.0694674	0.0613103	0.112908	0.0946915	0.127676	0.29649
0.763	NaN	NaN	0.0525918	0.0809576	0.0490909	0.0447854	0.0619244	0.0983007	0.152066	0.241045	0.30415	0.329151			0.763	NaN	NaN	0.0558905	0.147365	0.0857881	0.0406287	0.0588019	0.0646564	0.0904715	0.0910786	0.123129	0.286657
0.764	NaN	NaN	0.0796895	0.0638495	0.0368223	0.0458752	0.0594003	0.0932964	0.200794	0.236069	0.305092	0.329473			0.764	NaN	NaN	0.0356506	0.130425	0.0546636	0.037577	0.0504377	0.0545955	0.146775	0.0882582	0.0957724	0.25424
0.765	NaN	NaN	0.0717826	0.1239	0.0455548	0.0654566	0.064344	0.0975848	0.207911	0.275277	0.338003	0.277758			0.765	NaN	NaN	0.0441372	0.156408	0.0830277	0.0786298	0.0562174	0.0675915	0.145916	0.13118	0.116938	0.250971
0.766	NaN	NaN	0.0312078	0.0780326	0.0336445	0.0765877	0.0642964	0.100489	0.19643	0.247202	0.318468	0.208412			0.766	NaN	NaN	0.0551885	0.160111	0.0555409	0.0751354	0.0547077	0.0820238	0.119493	0.109503	0.157068	0.154629
0.767	NaN	NaN	0.022312	0.0631973	0.0463136	0.067866	0.0636434	0.0901757	0.206044	0.271403	0.319332	0.27922			0.767	NaN	NaN	0.0770323	0.115266	0.0464865	0.0761312	0.0608727	0.0827248	0.134306	0.080802	0.146297	0.242474
0.768	NaN	NaN	0.0381455	0.0735716	0.0496955	0.0579187	0.0625737	0.104504	0.176565	0.273243	0.326112	0.278389			0.768	NaN	NaN	0.0428823	0.117118	0.087436	0.0688571	0.0558333	0.0731624	0.110515	0.0874744	0.140858	0.221175
0.769	NaN	NaN	0.029577	0.0716283	0.0581882	0.070244	0.0559706	0.0964969	0.223745	0.259192	0.343047	0.302604			0.769	NaN	NaN	0.0555404	0.0990971	0.0706245	0.112396	0.0638322	0.0655362	0.119763	0.0965029	0.133395	0.25811
[truncated: 231 more rows]

## Sheet: HbProfiles-WT
Figure 1-source data
[truncated: 1,002 more rows]

## Sheet: Hbstau(rawposition)
Figure 1-source data
[truncated: 70 more rows]

## Sheet: HbWT(rawposition)
Figure 1-source data
[truncated: 48 more rows]

[truncated: 2 more sheets: HbcompareWT&stauHL54-sam, HbcompareWT&stauHL54&D3-time]
