# Supplementary material for: The dynamic transmission of positional information in stau- mutants during Drosophila embryogenesis
Source: eLife. 2020 Jun 8;9:e54276. doi: 10.7554/eLife.54276 (PMC7332292; doi:10.7554/eLife.54276)
Supplement: Figure 2—source data 1. — Source data for Figure 2A and B. [file elife-54276-fig2-data1.xlsx]

## Sheet: BcdProfiles-stau
Figure 2-source data
x/L	Intenstity(a.u.)	Intenstity error(a.u.)	Intenstity relative error	std of relative error
0.025	243.194	60.5738	0.249076	0.0147592
0.035	278.934	63.0107	0.225898	0.0190913
0.045	296.048	51.945	0.175461	0.0140805
0.055	281.61	50.21	0.178297	0.0126171
0.065	272.753	47.635	0.174645	0.0126197
0.075	271.7	44.5013	0.163788	0.0152121
0.085	268.891	48.4987	0.180365	0.0147099
0.095	259.162	43.8462	0.169185	0.0112907
0.105	265.748	48.8842	0.18395	0.0180886
0.115	254.211	38.5825	0.151773	0.0126141
0.125	255.37	43.0889	0.168731	0.0105928
0.135	248.504	42.4283	0.170735	0.0141298
0.145	247.7	41.4282	0.167252	0.011183
0.155	231.56	39.7584	0.171698	0.0157045
0.165	222.547	39.8205	0.178931	0.0159943
0.175	220.615	36.2536	0.164329	0.0142111
0.185	214.002	42.4903	0.198551	0.0158686
0.195	205.177	34.1658	0.166519	0.0144064
0.205	196.466	32.3153	0.164483	0.01219
0.215	192.808	32.8125	0.170182	0.0158909
0.225	184.093	32.4671	0.176362	0.0124414
0.235	174.091	31.469	0.180761	0.0138455
0.245	169.847	26.9046	0.158405	0.0167949
0.255	158.906	25.9289	0.163172	0.022574
0.265	154.308	27.5208	0.17835	0.0121546
0.275	142.851	23.9448	0.167621	0.0174297
0.285	139.102	24.3063	0.174737	0.0171674
0.295	130.949	24.3275	0.185779	0.01625
0.305	126.167	21.423	0.169799	0.0130879
0.315	117.495	19.3621	0.16479	0.0164039
0.325	109.478	20.7797	0.189807	0.0165813
0.335	107.51	18.614	0.173138	0.0200488
0.345	102.275	22.3075	0.218114	0.0181983
0.355	94.443	16.86	0.17852	0.0183541
0.365	89.0806	16.1207	0.180968	0.0193139
0.375	85.4515	17.794	0.208235	0.0207307
0.385	79.5013	15.045	0.189242	0.0189594
0.395	74.53	13.8359	0.185643	0.0169556
0.405	71.3145	15.2837	0.214314	0.018991
0.415	67.649	12.7881	0.189036	0.0136902
0.425	66.817	13.8196	0.206828	0.0223084
0.435	60.2413	12.2223	0.20289	0.0175513
0.445	61.3682	13.5878	0.221414	0.0182291
0.455	56.4574	13.046	0.231077	0.022727
0.465	55.4172	8.87606	0.160168	0.0129294
0.475	51.9949	11.3012	0.217351	0.0175545
0.485	49.434	10.609	0.21461	0.0199093
0.495	45.5581	9.19552	0.201842	0.0182242
0.505	46.4033	8.80248	0.189695	0.0182534
0.515	41.6644	8.90699	0.213779	0.0209773
0.525	39.3308	7.60856	0.19345	0.0202557
0.535	39.1842	7.49962	0.191394	0.0252837
0.545	35.2298	6.75704	0.191799	0.018739
0.555	32.5929	7.06837	0.216868	0.0206793
0.565	30.4718	6.87569	0.225641	0.0226596
0.575	30.6632	6.60606	0.215439	0.0205821
0.585	27.2725	5.72847	0.210045	0.017307
0.595	27.2701	4.17629	0.153146	0.013741
0.605	23.5027	5.21751	0.221996	0.0200138
0.615	24.2541	4.7993	0.197876	0.0162372
0.625	21.8019	3.99228	0.183116	0.0161858
0.635	21.6601	5.10199	0.235547	0.022656
0.645	21.1046	4.42833	0.209828	0.0133862
0.655	19.2667	4.0678	0.211131	0.0329715
0.665	18.2199	4.08442	0.224173	0.017557
0.675	18.1069	3.51852	0.194319	0.0229177
0.685	16.7894	3.79616	0.226105	0.0210065
0.695	16.7377	3.68207	0.219987	0.0223562
0.705	15.5119	3.54373	0.228453	0.0212185
0.715	15.1056	3.58288	0.237189	0.018833
0.725	15.1605	3.45147	0.227662	0.0288195
0.735	14.3678	3.25185	0.226329	0.0193306
0.745	13.9842	3.34232	0.239007	0.0300177
0.755	14.1306	3.22389	0.228151	0.0209185
0.765	13.2065	3.60821	0.273214	0.0242022
0.775	13.7045	3.57909	0.261161	0.0195066
0.785	13.3694	3.9876	0.298262	0.0281318
0.795	13.8183	3.71244	0.268661	0.0246338
0.805	13.2199	3.35313	0.253643	0.0246868
0.815	12.8395	3.47543	0.270682	0.0221154
0.825	12.4325	3.45193	0.277654	0.0234388
0.835	13.3269	3.12595	0.234559	0.0269307
0.845	12.4233	3.43808	0.276745	0.0194805
0.855	12.7113	3.88564	0.305685	0.0252272
0.865	12.2692	3.07609	0.250718	0.0230506
0.875	12.5942	3.95765	0.314244	0.0375192
0.885	11.8133	3.83821	0.324906	0.0313574
0.895	12.0075	3.44797	0.287152	0.0283323
0.905	11.8599	3.55426	0.299688	0.0270886
0.915	11.7013	3.65117	0.312032	0.0251064
0.925	11.91	4.01695	0.337276	0.0383883
0.935	11.0733	2.89068	0.261049	0.0175979
0.945	11.641	3.55034	0.304985	0.0257663
0.955	11.0845	3.44241	0.310561	0.0265039
0.965	10.5287	3.39115	0.322086	0.0197294
0.975	10.791	3.36921	0.312224	0.0151808
0.985	9.0856	2.39046	0.263104	0.0411186
Note:Average bin in figure2 A

## Sheet: BcdProfiles-WT
Figure 2-source data
x/L	Intenstity(a.u.)	Intenstity error(a.u.)	Intenstity relative error	std of relative error
0.025	613.174	140.022	0.228356	0.0163676
0.035	747.039	155.613	0.208306	0.0152948
0.045	771.15	169.56	0.21988	0.0190766
0.055	747.949	137.056	0.183242	0.0204855
0.065	735.888	120.644	0.163944	0.0167594
0.075	730.648	108.542	0.148556	0.010967
0.085	697.19	138.965	0.199322	0.0173986
0.095	655.231	122.94	0.187629	0.017814
0.105	682.023	128.793	0.188839	0.0169693
0.115	631.568	122.669	0.19423	0.0205118
0.125	608.462	116.251	0.191057	0.0158629
0.135	581.532	107.688	0.185179	0.0242091
0.145	578.837	96.9154	0.167431	0.0154417
0.155	536.943	80.8092	0.150499	0.018321
0.165	520.907	97.3796	0.186943	0.0149059
0.175	492.941	106.955	0.216973	0.024035
0.185	471.118	80.9413	0.171807	0.0195555
0.195	443.794	77.5879	0.174829	0.0180903
0.205	423.412	76.9548	0.181749	0.0230473
0.215	407.189	80.2123	0.19699	0.0206704
0.225	371.693	73.1301	0.196749	0.0290909
0.235	359.256	58.9035	0.16396	0.0165636
0.245	336.923	60.452	0.179424	0.0185498
0.255	347.735	46.2813	0.133094	0.0127623
0.265	311.162	59.018	0.18967	0.0145616
0.275	312.354	58.146	0.186154	0.0225175
0.285	291.987	56.0155	0.191842	0.0195323
0.295	276.668	47.3997	0.171323	0.0204044
0.305	260.71	44.5881	0.171026	0.0204117
0.315	248.263	48.7032	0.196176	0.0231032
0.325	238.047	43.5128	0.18279	0.0174066
0.335	224.644	38.6082	0.171864	0.0206969
0.345	214.336	40.1872	0.187496	0.014627
0.355	198.984	39.8365	0.2002	0.020794
0.365	201.008	39.4201	0.196112	0.0275417
0.375	182.031	31.4813	0.172945	0.0226667
0.385	177.131	36.9943	0.208852	0.0322305
0.395	170.449	30.031	0.176188	0.0224107
0.405	162.32	31.9254	0.196682	0.0193083
0.415	149.987	30.5467	0.203663	0.0296705
0.425	148.524	28.247	0.190185	0.0219063
0.435	138.744	24.145	0.174025	0.0180918
0.445	136.153	29.2201	0.214612	0.0233336
0.455	131.906	23.3809	0.177254	0.0158448
0.465	132.082	24.2142	0.183326	0.0179313
0.475	123.395	21.2812	0.172465	0.0218035
0.485	112.073	16.9315	0.151076	0.0144646
0.495	110.623	19.3068	0.174528	0.0245826
0.505	103.889	18.3717	0.176839	0.0137204
0.515	98.0409	19.9685	0.203675	0.0217369
0.525	90.8962	11.7094	0.128822	0.0156768
0.535	88.6561	13.694	0.154462	0.0130049
0.545	85.2462	14.3828	0.16872	0.0111732
0.555	76.9331	15.9384	0.207172	0.0216909
0.565	76.1778	14.4214	0.189312	0.0147768
0.575	68.7033	9.65652	0.140554	0.0147144
0.585	67.9401	10.4322	0.153549	0.0143878
0.595	62.1286	9.34007	0.150334	0.0142344
0.605	59.6798	9.61854	0.161169	0.0172625
0.615	55.0938	9.23912	0.167698	0.0165508
0.625	49.7487	7.92922	0.159385	0.0157561
0.635	49.5287	10.0904	0.203729	0.0217445
0.645	44.3753	9.07743	0.20456	0.0246048
0.655	42.9826	8.13907	0.189357	0.0186936
0.665	40.2259	6.80398	0.169144	0.0156761
0.675	38.0467	6.39259	0.16802	0.0195223
0.685	35.318	6.31327	0.178755	0.0217128
0.695	35.761	5.37877	0.150409	0.0178718
0.705	30.7012	5.58152	0.181801	0.0187817
0.715	31.1466	5.01576	0.161037	0.0166201
0.725	28.7759	5.23536	0.181935	0.026955
0.735	27.3193	4.81987	0.176427	0.019244
0.745	26.0567	3.70009	0.142002	0.0196037
0.755	24.3035	4.40257	0.18115	0.023786
0.765	22.4704	3.85377	0.171505	0.0216243
0.775	22.6677	4.58539	0.202287	0.0406065
0.785	20.9721	5.47029	0.260837	0.0681016
0.795	19.9079	5.06045	0.254192	0.0740732
0.805	20.1674	4.49609	0.222939	0.0670923
0.815	18.4446	4.59353	0.249045	0.064389
0.825	18.9263	4.57968	0.241974	0.0730398
0.835	16.8057	5.43696	0.32352	0.0670407
0.845	17.9637	3.69376	0.205624	0.0238741
0.855	16.0472	4.96679	0.309512	0.0597875
0.865	16.7477	3.94254	0.235408	0.0502376
0.875	16.9098	3.88259	0.229606	0.0643671
0.885	14.1374	5.00848	0.354273	0.0720097
0.895	14.7749	4.02004	0.272085	0.0436889
0.905	13.229	5.8307	0.440751	0.0765373
0.915	13.0672	5.2109	0.398776	0.0615332
0.925	13.2444	4.18904	0.316288	0.0406374
0.935	13.6952	3.74331	0.273329	0.0291669
0.945	12.1324	3.78522	0.311992	0.0264164
0.955	10.609	4.147	0.390893	0.0272016
0.965	8.25743	4.19524	0.508056	0.0331358
0.975	4.48154	2.15397	0.480633	0.0530998
0.985	9.0856	2.39046	0.263104	0.0411186
Note:Average bin in figure2 A

## Sheet: Bcd-dynamic profiles-stau
	Figure 2-source data
Time(min,AED)	102				110				118				126				134				142				150				158				166				174
	x/L	Intenstity(a.u.)	Intenstity error(a.u.)		x/L	Intenstity(a.u.)	Intenstity error(a.u.)		x/L	Intenstity(a.u.)	Intenstity error(a.u.)		x/L	Intenstity(a.u.)	Intenstity error(a.u.)		x/L	Intenstity(a.u.)	Intenstity error(a.u.)		x/L	Intenstity(a.u.)	Intenstity error(a.u.)		x/L	Intenstity(a.u.)	Intenstity error(a.u.)		x/L	Intenstity(a.u.)	Intenstity error(a.u.)		x/L	Intenstity(a.u.)	Intenstity error(a.u.)		x/L	Intenstity(a.u.)	Intenstity error(a.u.)
	0.02	202.694	81.8649		0.02	409.178	145.503		0.02	457.803	137.412		0.02	500.474	138.903		0.02	799.843	177.03		0.02	870.307	183.681		0.02	863.784	165.105		0.03	813.196	130.994		0.03	706.252	116.337		0.03	617.68	130.371
	0.04	183.804	91.7726		0.04	410.516	118.279		0.04	534.49	107.81		0.04	487.221	137.491		0.04	857.417	203.43		0.04	867.206	210.297		0.04	897.856	141.428		0.05	870.49	149.218		0.05	780.092	123.558		0.05	649.208	149.34
	0.06	230.739	94.166		0.06	493.021	140.356		0.06	557.448	139.917		0.06	578.089	124.823		0.06	854.707	199.652		0.06	855.609	217.951		0.06	851.433	185.497		0.07	885.529	184.65		0.07	765.094	145.508		0.07	622.238	116.681
	0.08	217.687	76.4237		0.08	450.024	168.763		0.08	531.612	155.763		0.08	585.346	177.852		0.08	813.973	185.563		0.08	844.806	210.268		0.08	841.799	176.967		0.09	853.484	182.186		0.09	790.55	153.71		0.09	687.881	145.46
	0.1	201.586	82.1836		0.1	446.094	88.4918		0.1	573.365	95.0642		0.1	604.352	135.078		0.1	809.672	202.149		0.1	847.11	180.795		0.1	880.491	195.018		0.11	842.018	160.807		0.11	764.297	128.267		0.11	692.989	158.259
	0.12	181.692	55.748		0.12	397.194	98.1007		0.12	530.77	98.7675		0.12	598.73	166.213		0.12	765.077	166.59		0.12	796.842	158.082		0.12	782.093	164.145		0.13	818.652	156.208		0.13	789.94	142.882		0.13	666.866	96.5404
	0.14	177.028	56.527		0.14	382.67	78.0182		0.14	546.817	139.297		0.14	558.483	154.267		0.14	791.497	184.724		0.14	784.284	153.986		0.14	805.71	173.098		0.15	803.595	147.688		0.15	730.661	132.942		0.15	663.373	119.512
	0.16	154.321	43.2215		0.16	355.605	78.718		0.16	499.064	105.221		0.16	538.074	132.725		0.16	700.246	118.981		0.16	719.229	150.087		0.16	767.913	149.283		0.17	719.15	142.523		0.17	745.843	147.227		0.17	653.796	150.413
	0.18	153.383	47.2934		0.18	319.648	81.7389		0.18	459.705	85.7015		0.18	502.466	125.125		0.18	648.576	132.213		0.18	669.018	145.6		0.18	708.456	163.34		0.19	673.625	147.344		0.19	635.158	113.651		0.19	617.604	114.517
	0.2	159.332	48.5793		0.2	278.18	64.2814		0.2	434.257	107.725		0.2	466.737	129.613		0.2	676.971	127.915		0.2	618.754	144.308		0.2	637.67	172.788		0.21	626.406	129.353		0.21	639.178	113.615		0.21	552.713	108.638
	0.22	128.841	37.0929		0.22	273.72	29.9742		0.22	403.222	93.531		0.22	456.375	111.001		0.22	590.973	106.635		0.22	634.23	129.694		0.22	612.787	150.891		0.23	629.715	92.0575		0.23	580.661	96.0143		0.23	580.322	99.2577
	0.24	116.748	41.8028		0.24	231.286	44.1194		0.24	381.736	93.0999		0.24	438.177	114.343		0.24	539.909	136.473		0.24	580.811	147.17		0.24	596.275	149.831		0.25	572.587	143.695		0.25	553.397	115.732		0.25	496.638	91.0828
	0.26	107.35	39.1763		0.26	205.03	43.0898		0.26	372.106	93.9666		0.26	360.046	90.8489		0.26	510.309	133.559		0.26	505.335	89.1593		0.26	538.093	114.792		0.27	532.319	123.773		0.27	493.248	83.6238		0.27	480.989	108.874
	0.28	122.919	41.7334		0.28	190.876	49.0174		0.28	322.675	66.2208		0.28	331.239	73.8414		0.28	468.553	108.548		0.28	482.281	98.1464		0.28	507.869	96.2651		0.29	494.442	107.604		0.29	457.218	73.9578		0.29	430.993	95.0105
	0.3	94.9906	34.4755		0.3	164.222	25.8832		0.3	290.581	65.5685		0.3	320.418	76.4883		0.3	420.952	113.61		0.3	431.423	76.9566		0.3	444.245	89.6407		0.31	421.062	113.992		0.31	403.903	64.4125		0.31	382.192	80.6881
	0.32	87.8203	30.6452		0.32	161.963	42.3356		0.32	261.897	65.7012		0.32	267.314	63.9757		0.32	403.445	88.2825		0.32	391.522	100.681		0.32	392.135	94.3058		0.33	374.379	76.2695		0.33	355.096	70.9829		0.33	355.443	73.9107
	0.34	66.945	26.5671		0.34	126.256	31.3613		0.34	241.932	45.444		0.34	242.881	61.345		0.34	345.319	92.2898		0.34	343.308	70.9703		0.34	354.014	73.6855		0.35	329.589	81.5448		0.35	302.956	52.1611		0.35	290.705	39.1821
	0.36	49.5382	21.2098		0.36	118.85	24.1299		0.36	198.569	49.6074		0.36	200.118	49.4785		0.36	312.69	70.039		0.36	315.164	65.7931		0.36	313.95	73.5968		0.37	291.729	54.822		0.37	251.592	48.2829		0.37	265.994	54.0807
	0.38	58.3735	33.0373		0.38	104.214	28.5398		0.38	195.247	43.0375		0.38	175.472	43.6383		0.38	258.695	58.968		0.38	263.185	59.8983		0.38	283.736	62.9441		0.39	268.789	55.8414		0.39	242.64	54.8148		0.39	233.373	50.0537
	0.4	51.2032	30.4844		0.4	87.1578	35.1384		0.4	161.59	34.1372		0.4	179.062	64.2367		0.4	241.542	54.7791		0.4	244.244	61.2666		0.4	255.718	64.0082		0.41	241.653	49.6981		0.41	216.499	50.1021		0.41	204.712	59.2713
	0.42	41.8368	18.738		0.42	78.8788	22.5997		0.42	136.981	36.159		0.42	153.681	55.7514		0.42	233.124	56.4832		0.42	215.309	55.4224		0.42	229.413	50.0296		0.43	201.257	51.004		0.43	186.343	33.5771		0.43	168.936	44.1584
	0.44	47.8556	25.6604		0.44	61.2822	23.5535		0.44	127.209	35.3485		0.44	126.77	44.5193		0.44	182.344	49.7075		0.44	197.521	46.7015		0.44	207.397	42.7182		0.45	186.107	49.0925		0.45	159.792	40.2853		0.45	155.655	44.9866
	0.46	43.3537	24.1519		0.46	57.4442	36.6326		0.46	118.501	27.9477		0.46	131.526	48.0081		0.46	179	39.2562		0.46	172.978	45.6848		0.46	179.371	35.7236		0.47	151.582	46.559		0.47	140.274	25.6956		0.47	139.682	32.352
	0.48	36.4622	31.8386		0.48	54.7242	28.5272		0.48	104.504	38.3279		0.48	104.754	39.42		0.48	154.195	45.5278		0.48	157.644	36.5379		0.48	164.892	53.2483		0.49	143.362	37.0525		0.49	136.888	39.4519		0.49	116.082	42.5529
	0.5	27.4068	22.8097		0.5	43.1251	24.8673		0.5	84.1021	28.6352		0.5	75.3627	41.4103		0.5	145.391	47.337		0.5	132.417	42.7498		0.5	128.415	39.9748		0.51	120.988	33.2712		0.51	103.326	36.2832		0.51	104.984	38.6113
	0.52	25.1304	17.8909		0.52	38.0268	25.2224		0.52	70.6762	21.0584		0.52	74.0842	36.1199		0.52	127.881	40.1577		0.52	139.114	41.6672		0.52	132.036	43.8281		0.53	108.473	31.438		0.53	84.9628	26.0234		0.53	83.8375	36.8531
	0.54	26.4644	20.9439		0.54	41.1615	21.6503		0.54	65.9459	31.4137		0.54	64.6421	29.6099		0.54	106.314	38.2193		0.54	117.473	37.5323		0.54	107.357	40.8012		0.55	81.8563	33.7293		0.55	76.8952	29.0212		0.55	61.8173	32.0655
	0.56	17.5144	21.4513		0.56	27.8629	25.9293		0.56	57.7691	19.2447		0.56	42.4604	35.0338		0.56	96.9059	42.0437		0.56	83.3044	39.3728		0.56	100.19	23.2056		0.57	86.3006	26.3322		0.57	65.4685	22.2338		0.57	58.4449	27.1768
	0.58	17.4582	13.6515		0.58	21.6422	18.4917		0.58	40.8319	26.0851		0.58	54.2027	30.7696		0.58	83.9318	37.0531		0.58	84.8327	32.1836		0.58	77.7403	28.5811		0.59	66.2938	19.9919		0.59	53.4873	23.5901		0.59	44.8183	24.4599
	0.6	18.9947	21.5013		0.6	30.2328	20.8433		0.6	44.6381	31.1726		0.6	34.8515	30.934		0.6	69.5324	32.1573		0.6	68.622	28.2104		0.6	64.0391	31.1096		0.61	47.6354	28.2971		0.61	59.2167	27.6314		0.61	44.2819	27.8929
	0.62	12.817	22.2344		0.62	21.0316	17.1306		0.62	32.0139	16.2862		0.62	33.2288	28.4444		0.62	68.0874	35.5251		0.62	73.5472	21.9563		0.62	51.0155	31.74		0.63	52.52	26.6199		0.63	40.6039	17.6637		0.63	33.5425	23.4352
	0.64	16.5314	17.9941		0.64	25.5749	25.5086		0.64	35.0191	25.2238		0.64	39.9542	30.0011		0.64	58.3104	29.1484		0.64	44.1107	28.2596		0.64	47.3002	26.9413		0.65	53.7689	25.8197		0.65	32.4227	23.3463		0.65	29.8295	22.2563
	0.66	11.6117	15.2636		0.66	18.6065	20.1282		0.66	30.6217	24.6333		0.66	25.0282	25.0061		0.66	42.5517	30.4967		0.66	54.9277	30.4535		0.66	47.6451	28.9527		0.67	43.4532	26.0163		0.67	30.6909	22.6682		0.67	30.7128	22.8927
	0.68	6.16227	15.0563		0.68	22.6462	21.4454		0.68	26.216	19.1971		0.68	26.8109	20.9213		0.68	44.4259	28.0999		0.68	51.9575	33.284		0.68	46.155	17.0844		0.69	34.0912	20.4457		0.69	27.7602	18.0874		0.69	19.9233	15.1046
	0.7	23.1757	27.5195		0.7	24.6253	29.3888		0.7	25.4589	22.237		0.7	25.4618	23.9883		0.7	45.8425	34.9169		0.7	51.0853	28.9776		0.7	44.023	28.6814		0.71	32.5467	20.2999		0.71	24.7112	17.3115		0.71	19.0102	15.978
	0.72	23.0505	24.0814		0.72	23.7147	22.1845		0.72	24.8835	24.1818		0.72	21.7878	21.5464		0.72	42.475	22.7098		0.72	30.2025	26.542		0.72	33.0185	24.8469		0.73	30.255	20.9963		0.73	22.521	16.5262		0.73	14.3265	12.6192
	0.74	12.0645	18.6453		0.74	27.3919	31.3563		0.74	22.9966	18.6811		0.74	26.2879	24.2795		0.74	43.1137	25.7592		0.74	41.2176	27.1072		0.74	33.3054	25.1773		0.75	26.4464	20.383		0.75	20.6394	13.945		0.75	12.4953	17.2692
	0.76	14.4946	13.7026		0.76	12.6415	17.535		0.76	23.0438	19.7161		0.76	16.3584	22.3621		0.76	29.8446	24.6205		0.76	30.4639	23.1312		0.76	24.4055	23.3886		0.77	26.0714	19.1946		0.77	27.7508	28.503		0.77	11.6571	12.4287
	0.78	7.76151	16.4397		0.78	19.9136	18.1166		0.78	32.6737	23.5847		0.78	13.9311	18.4281		0.78	29.5093	19.2973		0.78	37.7526	20.5178		0.78	37.823	28.9796		0.79	16.748	17.1012		0.79	29.5631	19.073		0.79	13.7885	15.098
	0.8	15.327	22.9619		0.8	20.8885	26.2863		0.8	33.748	17.8312		0.8	15.6655	36.1255		0.8	17.8625	24.6395		0.8	36.7542	31.0652		0.8	39.3737	28.7619		0.81	16.4422	14.6617		0.81	19.6419	27.206		0.81	14.1315	17.3525
	0.82	14.3365	20.8809		0.82	24.8544	21.5967		0.82	28.0397	27.6448		0.82	12.1356	22.1873		0.82	25.0715	19.2254		0.82	34.0019	18.5566		0.82	30.0059	23.3315		0.83	45.1896	10.4916		0.83	7.55327	0		0.83	10.2185	11.7181
	0.84	11.6902	21.43		0.84	21.948	24.9405		0.84	38.7043	28.4756		0.84	24.0781	30.2114		0.84	23.1075	16.9602		0.84	27.2871	21.1774		0.84	39.0612	19.7316		0.85	15.1384	11.5672		0.85	7.67053	10.8478		0.85	5.88005	9.77457
	0.86	12.6631	16.7371		0.86	28.9151	23.4631		0.86	20.7284	19.6422		0.86	19.7743	29.5547		0.86	20.3669	28.8032		0.86	27.9516	25.9695		0.86	72.2527	0.65985		0.87	20.246	12.0288		0.87	9.66161	0		0.87	20.8371	18.0868
	0.88	12.7353	21.4514		0.88	23.2134	26.49		0.88	21.5335	19.2832		0.88	14.6114	22.8857		0.88	37.5557	0		0.88	21.1243	18.2152		0.88	46.671	0		0.89	9.40825	18.578		0.91	21.3142	19.7119		0.89	2.74182	5.48365
	0.9	13.0285	20.3851		0.9	24.3651	25.345		0.9	19.2926	17.8569		0.9	19.8165	24.2701		0.9	32.13	18.9942		0.9	29.5488	27.8339		0.9	34.9804	20.1249		0.91	34.0923	29.5005		0.93	22.8536	19.3863		0.91	14.5392	15.085
	0.92	5.67625	13.2545		0.92	20.603	21.3182		0.92	30.1955	21.68		0.92	14.4018	17.1343		0.92	25.2954	26.9389		0.92	30.453	18.7492		0.92	32.644	25.1875		0.93	29.7696	22.703		0.95	21.7826	24.2918		0.93	14.4708	15.5713
	0.94	18.3363	24.6041		0.94	12.794	14.0943		0.94	15.7488	17.0556		0.94	19.2936	18.464		0.94	31.5535	19.2633		0.94	39.3896	20.8409		0.94	23.6262	25.2182		0.95	23.2748	17.769						0.95	15.1458	19.9488
	0.96	16.2035	24.8995		0.96	12.6727	14.9964		0.96	24.1115	22.5644		0.96	16.5014	22.1595		0.96	31.6926	25.8699		0.96	27.814	27.5063		0.96	33.0868	18.7869		0.97	23.4425	16.0261						0.97	12.451	14.4345
	0.98	17.5997	25.4641		0.98	15.1116	23.0049
