# Supplementary material for: The dynamic transmission of positional information in stau- mutants during Drosophila embryogenesis
Source: eLife. 2020 Jun 8;9:e54276. doi: 10.7554/eLife.54276 (PMC7332292; doi:10.7554/eLife.54276)
Supplement: Figure 3—source data 1. [file elife-54276-fig3-data1.xlsx]

## Sheet: BcdProfiles-stau (correct)
Figure 3-source data (bin 0.01, Figure 0.02)
x/L	Intenstity(a.u.)	Intenstity error(a.u.)
0.025	550.178	137.036
0.035	637.474	144.004
0.045	684.429	120.091
0.055	658.608	117.428
0.065	644.48	112.555
0.075	646.986	105.969
0.085	643.14	116
0.095	620.457	104.972
0.105	634.866	116.783
0.115	604.483	91.7443
0.125	603.2	101.779
0.135	582.168	99.3962
0.145	574.842	96.1434
0.155	531.883	91.3233
0.165	505.61	90.4692
0.175	495.471	81.4204
0.185	474.796	94.2711
0.195	449.36	74.8267
0.205	424.464	69.817
0.215	410.762	69.9044
0.225	386.708	68.2007
0.235	360.612	65.1847
0.245	346.857	54.9438
0.255	319.78	52.179
0.265	305.858	54.5499
0.275	278.788	46.7308
0.285	267.211	46.6916
0.295	247.576	45.9943
0.305	234.819	39.8721
0.315	215.394	35.4949
0.325	197.831	37.5498
0.335	191.628	33.1781
0.345	179.908	39.2403
0.355	164.034	29.2834
0.365	152.818	27.6551
0.375	144.804	30.1533
0.385	133.089	25.186
0.395	123.302	22.8902
0.405	116.674	25.005
0.415	109.509	20.7011
0.425	107.04	22.1388
0.435	95.5164	19.3793
0.445	96.3652	21.3366
0.455	87.8806	20.3072
0.465	85.5628	13.7044
0.475	79.6523	17.3125
0.485	75.1676	16.1317
0.495	68.8049	13.8877
0.505	69.625	13.2075
0.515	62.0642	13.268
0.525	58.1052	11.2405
0.535	57.3778	10.9817
0.545	51.1177	9.80434
0.555	46.8492	10.1601
0.565	43.3841	9.78926
0.575	43.2436	9.31636
0.585	38.1028	8.00332
0.595	37.7429	5.78016
0.605	32.2261	7.15407
0.615	32.957	6.52139
0.625	29.3666	5.3775
0.635	28.9291	6.81418
0.645	27.9561	5.86598
0.655	25.3188	5.3456
0.665	23.7586	5.32604
0.675	23.4344	4.55375
0.685	21.5711	4.87732
0.695	21.3525	4.69728
0.705	19.6526	4.48969
0.715	19.0097	4.50889
0.725	18.9545	4.31521
0.735	17.8493	4.03982
0.745	17.2653	4.12652
0.755	17.3408	3.95631
0.765	16.1116	4.4019
0.775	16.6234	4.34137
0.785	16.1263	4.80988
0.795	16.5772	4.45364
0.805	15.7753	4.0013
0.815	15.2426	4.1259
0.825	14.6857	4.07753
0.835	15.666	3.67461
0.845	14.5355	4.02262
0.855	14.8055	4.52581
0.865	14.2288	3.56742
0.875	14.5456	4.57088
0.885	13.5905	4.41564
0.895	13.7633	3.95215
0.905	13.5477	4.06008
0.915	13.3246	4.15771
0.925	13.5238	4.56126
0.935	12.5422	3.27412
0.945	13.1565	4.01254
0.955	12.5049	3.88352
0.965	11.8609	3.82023
0.975	12.1438	3.79159
0.985	10.2183	2.68846

## Sheet: BcdProfiles-WT (correct)
Figure 3-source data (bin 0.01, Figure 0.02)
x/L	Intenstity(a.u.)	Intenstity error(a.u.)
0.025	1439.49	265.482
0.035	1688.39	195.785
0.045	1699.34	459.169
0.055	1900.18	319.453
0.065	1862.31	260.373
0.075	1800.83	192.899
0.085	1719.53	198.888
0.095	1832.12	101.44
0.105	1740.44	260.483
0.115	1803.92	45.6291
0.125	1619.43	216.754
0.135	1609.04	117.715
0.145	1434.01	166.297
0.155	1447.37	92.5087
0.165	1268.97	136.395
0.175	1116.7	238.472
0.185	1222.9	157.97
0.195	927.051	157.542
0.205	944.068	190.308
0.215	927.445	174.773
0.225	770.513	0
0.235	816.066	114.079
0.245	764.57	189.344
0.255	753.156	195.383
0.275	685.69	142.758
0.285	623.268	139.666
0.295	591.873	134.926
0.305	629.924	78.5709
0.315	538.597	57.2199
0.325	450.849	61.3864
0.335	455.149	71.828
0.345	462.188	28.4363
0.355	401.473	69.1869
0.365	474.539	0
0.375	359.715	51.1219
0.395	349.145	51.9313
0.405	302.945	41.071
0.425	246.712	22.9989
0.435	261.769	31.137
0.445	199.428	11.5901
0.455	213.579	17.2727
0.465	204.171	34.4517
0.475	211.517	15.0932
0.485	174.12	0
0.495	179.304	21.7148
0.505	143.487	5.27003
0.515	133.945	14.4612
0.525	138.22	34.0719
0.535	129.667	4.97335
0.545	124.021	18.7527
0.555	125.447	32.5276
0.565	105.925	21.2225
0.575	93.4166	18.6654
0.585	101.378	22.4864
0.595	88.9234	0
0.605	86.6462	19.7151
0.615	91.083	19.4781
0.625	79.3637	9.59816
0.635	66.573	13.79
0.645	54.2434	16.1653
0.655	65.5189	5.97017
0.665	61.4288	16.6695
0.675	59.5223	14.7084
0.685	44.1705	14.6275
0.695	28.1237	0
0.705	53.8571	13.9226
0.715	39.4657	12.6886
0.725	27.8056	0
0.735	31.1102	9.7203
0.745	40.9207	7.5969
0.755	34.3668	4.04837
0.765	20.097	7.98274
0.775	23.5125	8.2815
0.785	28.3856	12.5785
0.795	20.598	0
0.805	23.2336	12.8714
0.815	15.7932	3.79854
0.825	17.2394	1.32217
0.845	7.8357	3.62218
0.855	18.9946	10.0742
0.865	17.3422	0
0.875	9.52969	4.02903
0.895	12.2916	10.6613
0.905	18.6628	8.65054
0.915	10.1189	1.52117
0.925	16.139	6.10704
0.935	17.5469	7.91545
0.945	11.9629	13.5344
0.955	7.88006	8.04101
0.965	13.1167	9.79044
0.975	7.21352	7.35939

## Sheet: MaturationCorrectionFactor-WT
Figure 3-source data
x/L	Maturation correction factor
0	2.46726
0.01	2.46726
0.02	2.4807
0.03	2.50024
0.04	2.51898
0.05	2.53228
0.06	2.53745
0.07	2.53292
0.08	2.51775
0.09	2.49276
0.1	2.45967
0.11	2.42028
0.12	2.3763
0.13	2.32929
0.14	2.28068
0.15	2.23174
0.16	2.18353
0.17	2.13692
0.18	2.09241
0.19	2.05013
0.2	2.00977
0.21	1.97095
0.22	1.9335
0.23	1.89748
0.24	1.86291
0.25	1.82987
0.26	1.79845
0.27	1.7685
0.28	1.73969
0.29	1.71204
0.3	1.68571
0.31	1.66071
0.32	1.6371
0.33	1.61486
0.34	1.59372
0.35	1.57338
0.36	1.55351
0.37	1.534
0.38	1.51505
0.39	1.49685
0.4	1.47944
0.41	1.46287
0.42	1.44717
0.43	1.43229
0.44	1.41819
0.45	1.40446
0.46	1.39084
0.47	1.37781
0.48	1.36534
0.49	1.3534
0.5	1.34196
0.51	1.33098
0.52	1.32045
0.53	1.31034
0.54	1.30062
0.55	1.29128
0.56	1.2823
0.57	1.27365
0.58	1.26533
0.59	1.25731
0.6	1.24957
0.61	1.24211
0.62	1.23491
0.63	1.22796
0.64	1.22124
0.65	1.21474
0.66	1.20845
0.67	1.20237
0.68	1.19647
0.69	1.19076
0.7	1.18522
0.71	1.17984
0.72	1.17462
0.73	1.16954
0.74	1.16461
0.75	1.15982
0.76	1.15516
0.77	1.15063
0.78	1.14621
0.79	1.14192
0.8	1.13776
0.81	1.13371
0.82	1.12978
0.83	1.12597
0.84	1.12229
0.85	1.11875
0.86	1.11535
0.87	1.1121
0.88	1.10901
0.89	1.10609
0.9	1.10337
0.91	1.10085
0.92	1.09856
0.93	1.0965
0.94	1.0947
0.95	1.09316
0.96	1.09192
0.97	1.09098
0.98	1.09034
0.99	1.09002
1	1.09002

## Sheet: MaturationCorrectionFactor-stau
Figure 3-source data
x/L	Maturation correction factor
0	2.2417
0.01	2.2417
0.02	2.25201
0.03	2.27259
0.04	2.2982
0.05	2.32557
0.06	2.35189
0.07	2.37384
0.08	2.38866
0.09	2.39498
0.1	2.3932
0.11	2.38476
0.12	2.37099
0.13	2.35313
0.14	2.33224
0.15	2.30921
0.16	2.2847
0.17	2.25914
0.18	2.23258
0.19	2.20472
0.2	2.17549
0.21	2.1455
0.22	2.11534
0.23	2.08588
0.24	2.05691
0.25	2.02744
0.26	1.99733
0.27	1.96693
0.28	1.93628
0.29	1.90566
0.3	1.87561
0.31	1.84675
0.32	1.81968
0.33	1.7944
0.34	1.77045
0.35	1.74769
0.36	1.72604
0.37	1.70497
0.38	1.68418
0.39	1.6639
0.4	1.64489
0.41	1.62722
0.42	1.61034
0.43	1.59363
0.44	1.57749
0.45	1.56306
0.46	1.5501
0.47	1.53785
0.48	1.526
0.49	1.51513
0.5	1.5054
0.51	1.49546
0.52	1.48378
0.53	1.47091
0.54	1.45771
0.55	1.44425
0.56	1.43056
0.57	1.41694
0.58	1.40361
0.59	1.39061
0.6	1.37747
0.61	1.36487
0.62	1.35278
0.63	1.34117
0.64	1.33001
0.65	1.31929
0.66	1.30896
0.67	1.29902
0.68	1.28943
0.69	1.28018
0.7	1.27125
0.71	1.26263
0.72	1.25429
0.73	1.24622
0.74	1.23841
0.75	1.23085
0.76	1.22352
0.77	1.21642
0.78	1.20954
0.79	1.20288
0.8	1.19643
0.81	1.19018
0.82	1.18414
0.83	1.17832
0.84	1.17271
0.85	1.16733
0.86	1.16218
0.87	1.15727
0.88	1.15263
0.89	1.14826
0.9	1.14419
0.91	1.14044
0.92	1.13703
0.93	1.13398
0.94	1.13131
0.95	1.12906
0.96	1.12722
0.97	1.12583
0.98	1.1249
0.99	1.12443
1	1.12443
