# Supplementary material for: The dynamic transmission of positional information in stau- mutants during Drosophila embryogenesis
Source: eLife. 2020 Jun 8;9:e54276. doi: 10.7554/eLife.54276 (PMC7332292; doi:10.7554/eLife.54276)
Supplement: Figure 4—source data 1. [file elife-54276-fig4-data1.xlsx]

## Sheet: Kr&HbcompareWT&stau
Figure 4-source data
	Hb					Kr
	WT(%EL)		stau HL54(%EL)			WT(%EL)		stau HL54(%EL)
Time(min)	position	error	position	error		Time(min)	position	Time(min)	position
0-5	44.37	1.44	37.56	1.84619		18	44.35	9	34.15
5-10	45.93	1.81	39.9	2.64528		28	44.35	22	39.9
10-15	47.73	1.33	41.99	1.35157		48.3333	45.95	32.5	41.6567
15-20	46	2.12	41.75	1.3435		51.5	46.325	39	40.55
20-25	48.29	0.93	43.44	0.840015				45	43.1
25-30	46.67	1.1	44.59	1.20078				46	40.8
30-35	47.28	1.39	45.53	1.44135				50.5	40.8
35-40	47.1	2.03	46.53	1.60271
40-45	47.84	0.5	48	1.26194
45-50	47.63	1.14	47.19	1.7365
50-55	48.08	0.39	47.82	1.63921
55-60	47.2	1.59	47.85	0.925743

## Sheet: EveWT&stau
Figure 4-source data
WT(%EL)
Time(min)	peak1	peak2	peak3	peak4	peak5	peak6	peak7
30	34.3333	42.5333	50.7	57.1	64.5333	71.1667	79.8333
35	32.8	41.58	49.1	55.22	62.76	69.4	79.08
40	34.7	43.4167	50.5	56.625	63.325	69.0667	77.4667
45	33.8	42.4625	49.725	55.6937	62.1875	68.4562	76.4437
50	34.4857	42.7048	49.8286	55.4429	61.6476	67.5762	75.3857
55	33.9944	41.9833	49.1889	54.6889	60.7722	66.9444	74.5333
stau HL54(%EL)
Time(min)	peak1	peak2	peak3	peak4
25	0.285	0.4305	0.6735	0.796
35	0.253	0.396	0.58725	0.76625
40	0.267143	0.402857	0.578	0.788857
45	0.260667	0.38	0.562667	0.791667
50	0.2772	0.4002	0.5594	0.7614
55	0.28875	0.4075	0.56425	0.75
