# Supplementary material for: The dynamic transmission of positional information in stau- mutants during Drosophila embryogenesis
Source: eLife. 2020 Jun 8;9:e54276. doi: 10.7554/eLife.54276 (PMC7332292; doi:10.7554/eLife.54276)
Supplement: Figure 6—source data 1. [file elife-54276-fig6-data1.docx]

| Parameter | | WT | Bcd1.0 | *stau-* | Source |
| --- | --- | --- | --- | --- | --- |
| Hb degradation rate |  |  | | | (Papatsenko and Levine, 2008) |
| Hb diffusion rate |  |  | | | (Papatsenko and Levine, 2008) |
| Bcd decay rate |  |  | | | (Little et al., 2011) |
| Hill coefficient for Bcd |  |  | | | (Driever et al., 1989; Gregor et al., 2007a) |
| Hill coefficient for Hb |  |  | | | (Treisman and Desplan, 1989) |
| Bcd gradient amplitude |  | 2 |  |  | Measured |
| Bcd length constant |  |  | |  |
| Amplitude of initial Hb |  | 1 | | | Fixed |
| Steepness of initial Hb boundary |  |  | | |
| Bcd regulation strength |  |  | | | [0.1~0.5] |
| “Threshold” for Bcd |  |  | | | [0.01~0.31] |
| Hb regulation strength |  |  | | | [0.1~0.5] |
| “Threshold” for Hb |  |  | | | [1~2] |
| Time triggering Bcd decay |  |  | | | [-5~10] |
| Simulation time offset of the beginning of nc14 |  |  | | | [-20~20] |
| Boundary position of initial Hb distribution |  |  | | (Fixed) | [0.3~0.5] |
