# Supplementary material for: The dynamic transmission of positional information in stau- mutants during Drosophila embryogenesis
Source: eLife. 2020 Jun 8;9:e54276. doi: 10.7554/eLife.54276 (PMC7332292; doi:10.7554/eLife.54276)
Supplement: Figure 6—source data 2. [file elife-54276-fig6-data2.xlsx]

## Sheet: Fisure6D
time(min)	xhb_WT(EL)	xhb_Stau-(EL)	xhb_Bcd1.0(EL)
-10	0.3	0	0.3
-9.992	0.3	0.323	0.301
-9.984	0.3	0.323	0.301
-9.976	0.3	0.323	0.301
-9.968	0.3	0.323	0.302
-9.96	0.3	0.323	0.302
-9.952	0.3	0.323	0.303
-9.94399	0.3	0.323	0.303
-9.93599	0.301	0.323	0.303
-9.92799	0.301	0.323	0.304
-9.91999	0.301	0.323	0.304
-9.91199	0.301	0.323	0.305
-9.90399	0.301	0.323	0.305
-9.89599	0.301	0.323	0.305
-9.88799	0.301	0.323	0.306
-9.87999	0.301	0.323	0.306
-9.87199	0.301	0.323	0.307
-9.86399	0.301	0.323	0.307
-9.85599	0.301	0.323	0.307
-9.84798	0.301	0.323	0.308
-9.83998	0.301	0.323	0.308
-9.83198	0.301	0.323	0.309
-9.82398	0.301	0.323	0.309
-9.81598	0.301	0.323	0.309
-9.80798	0.301	0.323	0.31
-9.79998	0.301	0.323	0.31
-9.79198	0.301	0.323	0.31
-9.78398	0.301	0.323	0.311
-9.77598	0.301	0.324	0.311
-9.76798	0.301	0.324	0.312
-9.75998	0.301	0.324	0.312
-9.75198	0.301	0.324	0.312
-9.74397	0.301	0.324	0.313
-9.73597	0.301	0.324	0.313
-9.72797	0.301	0.324	0.313
-9.71997	0.301	0.324	0.314
-9.71197	0.301	0.324	0.314
-9.70397	0.301	0.324	0.314
-9.69597	0.301	0.324	0.315
-9.68797	0.301	0.324	0.315
-9.67997	0.302	0.324	0.315
-9.67197	0.302	0.324	0.316
-9.66397	0.302	0.324	0.316
-9.65597	0.302	0.324	0.316
-9.64796	0.302	0.324	0.317
-9.63996	0.302	0.324	0.317
-9.63196	0.302	0.324	0.317
-9.62396	0.302	0.324	0.317
-9.61596	0.302	0.324	0.318
-9.60796	0.302	0.324	0.318
-9.59996	0.302	0.324	0.318
-9.59196	0.302	0.324	0.319
-9.58396	0.302	0.324	0.319
-9.57596	0.302	0.324	0.319
-9.56796	0.302	0.324	0.319
-9.55996	0.302	0.324	0.32
-9.55196	0.302	0.324	0.32
-9.54395	0.302	0.324	0.32
-9.53595	0.302	0.324	0.32
-9.52795	0.302	0.324	0.321
-9.51995	0.302	0.324	0.321
-9.51195	0.302	0.324	0.321
-9.50395	0.302	0.324	0.321
-9.49595	0.302	0.324	0.322
-9.48795	0.302	0.324	0.322
-9.47995	0.302	0.324	0.322
-9.47195	0.302	0.324	0.322
-9.46395	0.302	0.324	0.323
-9.45595	0.303	0.324	0.323
-9.44794	0.303	0.324	0.323
-9.43994	0.303	0.324	0.323
-9.43194	0.303	0.324	0.323
-9.42394	0.303	0.324	0.324
-9.41594	0.303	0.324	0.324
-9.40794	0.303	0.324	0.324
-9.39994	0.303	0.324	0.324
-9.39194	0.303	0.324	0.324
-9.38394	0.303	0.324	0.325
-9.37594	0.303	0.324	0.325
-9.36794	0.303	0.324	0.325
-9.35994	0.303	0.324	0.325
-9.35194	0.303	0.324	0.325
-9.34393	0.303	0.324	0.325
-9.33593	0.303	0.324	0.326
-9.32793	0.303	0.324	0.326
-9.31993	0.303	0.324	0.326
-9.31193	0.303	0.324	0.326
-9.30393	0.303	0.325	0.326
-9.29593	0.303	0.325	0.326
-9.28793	0.303	0.325	0.327
-9.27993	0.303	0.325	0.327
-9.27193	0.303	0.325	0.327
-9.26393	0.303	0.325	0.327
-9.25593	0.304	0.325	0.327
-9.24792	0.304	0.325	0.327
-9.23992	0.304	0.325	0.327
-9.23192	0.304	0.325	0.328
-9.22392	0.304	0.325	0.328
-9.21592	0.304	0.325	0.328
-9.20792	0.304	0.325	0.328
-9.19992	0.304	0.325	0.328
-9.19192	0.304	0.325	0.328
-9.18392	0.304	0.325	0.328
-9.17592	0.304	0.325	0.328
-9.16792	0.304	0.325	0.329
-9.15992	0.304	0.325	0.329
-9.15192	0.304	0.325	0.329
-9.14391	0.304	0.325	0.329
-9.13591	0.304	0.325	0.329
-9.12791	0.304	0.325	0.329
-9.11991	0.304	0.325	0.329
-9.11191	0.304	0.325	0.329
-9.10391	0.304	0.325	0.33
-9.09591	0.304	0.325	0.33
-9.08791	0.304	0.325	0.33
-9.07991	0.305	0.325	0.33
-9.07191	0.305	0.325	0.33
-9.06391	0.305	0.325	0.33
-9.05591	0.305	0.325	0.33
-9.0479	0.305	0.325	0.33
-9.0399	0.305	0.325	0.33
-9.0319	0.305	0.325	0.331
-9.0239	0.305	0.325	0.331
-9.0159	0.305	0.325	0.331
-9.0079	0.305	0.325	0.331
-8.9999	0.305	0.325	0.331
-8.9919	0.305	0.325	0.331
-8.9839	0.305	0.325	0.331
-8.9759	0.305	0.325	0.331
-8.9679	0.305	0.325	0.331
-8.9599	0.305	0.325	0.331
-8.9519	0.305	0.325	0.331
-8.94389	0.305	0.325	0.332
-8.93589	0.305	0.325	0.332
-8.92789	0.305	0.325	0.332
-8.91989	0.305	0.325	0.332
-8.91189	0.306	0.325	0.332
-8.90389	0.306	0.325	0.332
-8.89589	0.306	0.325	0.332
-8.88789	0.306	0.325	0.332
-8.87989	0.306	0.325	0.332
-8.87189	0.306	0.325	0.332
-8.86389	0.306	0.325	0.332
-8.85589	0.306	0.325	0.332
-8.84788	0.306	0.326	0.333
-8.83988	0.306	0.326	0.333
-8.83188	0.306	0.326	0.333
-8.82388	0.306	0.326	0.333
-8.81588	0.306	0.326	0.333
-8.80788	0.306	0.326	0.333
-8.79988	0.306	0.326	0.333
-8.79188	0.306	0.326	0.333
-8.78388	0.306	0.326	0.333
-8.77588	0.306	0.326	0.333
-8.76788	0.307	0.326	0.333
-8.75988	0.307	0.326	0.333
-8.75188	0.307	0.326	0.333
-8.74387	0.307	0.326	0.333
-8.73587	0.307	0.326	0.334
-8.72787	0.307	0.326	0.334
-8.71987	0.307	0.326	0.334
-8.71187	0.307	0.326	0.334
-8.70387	0.307	0.326	0.334
-8.69587	0.433	0.326	0.334
-8.68787	0.433	0.326	0.334
-8.67987	0.433	0.326	0.334
-8.67187	0.433	0.326	0.334
-8.66387	0.433	0.326	0.334
-8.65587	0.433	0.326	0.334
-8.64786	0.434	0.326	0.334
-8.63986	0.434	0.326	0.334
-8.63186	0.434	0.326	0.334
-8.62386	0.434	0.326	0.334
-8.61586	0.434	0.326	0.335
-8.60786	0.434	0.326	0.335
-8.59986	0.434	0.326	0.335
-8.59186	0.434	0.326	0.335
-8.58386	0.434	0.326	0.335
-8.57586	0.435	0.326	0.335
-8.56786	0.435	0.326	0.335
-8.55986	0.435	0.326	0.335
-8.55186	0.435	0.326	0.335
-8.54385	0.435	0.326	0.335
-8.53585	0.435	0.326	0.335
-8.52785	0.435	0.326	0.335
-8.51985	0.435	0.326	0.335
-8.51185	0.435	0.326	0.335
-8.50385	0.435	0.326	0.335
-8.49585	0.435	0.326	0.335
-8.48785	0.436	0.326	0.335
-8.47985	0.436	0.326	0.335
-8.47185	0.436	0.326	0.335
-8.46385	0.436	0.326	0.336
-8.45585	0.436	0.326	0.336
-8.44784	0.436	0.326	0.336
-8.43984	0.436	0.326	0.336
-8.43184	0.436	0.326	0.336
-8.42384	0.436	0.327	0.336
-8.41584	0.436	0.327	0.336
-8.40784	0.436	0.327	0.336
-8.39984	0.436	0.327	0.336
-8.39184	0.436	0.327	0.336
-8.38384	0.437	0.327	0.336
-8.37584	0.437	0.327	0.336
-8.36784	0.437	0.327	0.336
-8.35984	0.437	0.327	0.336
-8.35184	0.437	0.327	0.336
-8.34383	0.437	0.327	0.336
-8.33583	0.437	0.327	0.336
-8.32783	0.437	0.327	0.336
-8.31983	0.437	0.327	0.336
-8.31183	0.437	0.327	0.336
-8.30383	0.437	0.327	0.336
-8.29583	0.437	0.327	0.337
-8.28783	0.437	0.327	0.337
-8.27983	0.437	0.327	0.337
-8.27183	0.437	0.327	0.337
-8.26383	0.437	0.327	0.337
-8.25583	0.438	0.327	0.337
-8.24782	0.438	0.327	0.337
-8.23982	0.438	0.327	0.337
-8.23182	0.438	0.327	0.337
-8.22382	0.438	0.327	0.337
-8.21582	0.438	0.327	0.337
-8.20782	0.438	0.327	0.337
-8.19982	0.438	0.327	0.337
-8.19182	0.438	0.327	0.337
-8.18382	0.438	0.327	0.337
-8.17582	0.438	0.327	0.337
-8.16782	0.438	0.327	0.337
-8.15982	0.438	0.327	0.337
-8.15182	0.438	0.327	0.337
-8.14381	0.438	0.327	0.337
-8.13581	0.438	0.327	0.337
-8.12781	0.438	0.327	0.337
-8.11981	0.438	0.327	0.337
-8.11181	0.438	0.327	0.337
-8.10381	0.439	0.327	0.337
-8.09581	0.439	0.327	0.338
-8.08781	0.439	0.327	0.338
-8.07981	0.439	0.327	0.338
-8.07181	0.439	0.327	0.338
-8.06381	0.439	0.327	0.338
-8.05581	0.439	0.327	0.338
-8.0478	0.439	0.327	0.338
-8.0398	0.439	0.327	0.338
-8.0318	0.439	0.327	0.338
-8.0238	0.439	0.327	0.338
-8.0158	0.439	0.328	0.338
-8.0078	0.439	0.328	0.338
-7.9998	0.439	0.328	0.338
-7.9918	0.439	0.328	0.338
-7.9838	0.439	0.328	0.338
-7.9758	0.439	0.328	0.338
-7.9678	0.439	0.328	0.338
-7.9598	0.439	0.328	0.338
-7.9518	0.439	0.328	0.338
-7.94379	0.439	0.328	0.338
-7.93579	0.439	0.328	0.338
-7.92779	0.439	0.328	0.338
-7.91979	0.439	0.328	0.338
-7.91179	0.44	0.328	0.338
-7.90379	0.44	0.328	0.338
-7.89579	0.44	0.328	0.338
-7.88779	0.44	0.328	0.338
-7.87979	0.44	0.328	0.338
-7.87179	0.44	0.328	0.338
-7.86379	0.44	0.328	0.339
-7.85579	0.44	0.328	0.339
-7.84778	0.44	0.328	0.339
-7.83978	0.44	0.328	0.339
-7.83178	0.44	0.328	0.339
-7.82378	0.44	0.328	0.339
-7.81578	0.44	0.328	0.339
-7.80778	0.44	0.328	0.339
-7.79978	0.44	0.328	0.339
-7.79178	0.44	0.328	0.339
-7.78378	0.44	0.328	0.339
-7.77578	0.44	0.328	0.339
-7.76778	0.44	0.328	0.339
-7.75978	0.44	0.328	0.339
-7.75178	0.44	0.328	0.339
-7.74377	0.44	0.328	0.339
-7.73577	0.44	0.328	0.339
-7.72777	0.44	0.328	0.339
-7.71977	0.44	0.328	0.339
-7.71177	0.44	0.328	0.339
-7.70377	0.44	0.328	0.339
-7.69577	0.44	0.328	0.339
-7.68777	0.441	0.328	0.339
-7.67977	0.441	0.328	0.339
-7.67177	0.441	0.328	0.339
-7.66377	0.441	0.328	0.339
-7.65577	0.441	0.328	0.339
-7.64776	0.441	0.328	0.339
-7.63976	0.441	0.328	0.339
-7.63176	0.441	0.328	0.339
-7.62376	0.441	0.329	0.339
-7.61576	0.441	0.329	0.339
-7.60776	0.441	0.329	0.339
-7.59976	0.441	0.329	0.339
-7.59176	0.441	0.329	0.34
-7.58376	0.441	0.329	0.34
-7.57576	0.441	0.329	0.34
-7.56776	0.441	0.329	0.34
-7.55976	0.441	0.329	0.34
-7.55176	0.441	0.329	0.34
-7.54375	0.441	0.329	0.34
-7.53575	0.441	0.329	0.34
-7.52775	0.441	0.329	0.34
-7.51975	0.441	0.329	0.34
-7.51175	0.441	0.329	0.34
-7.50375	0.441	0.329	0.34
-7.49575	0.441	0.329	0.34
-7.48775	0.441	0.329	0.34
-7.47975	0.441	0.329	0.34
-7.47175	0.441	0.329	0.34
-7.46375	0.441	0.329	0.34
-7.45575	0.441	0.329	0.34
-7.44774	0.441	0.329	0.34
-7.43974	0.441	0.329	0.34
-7.43174	0.441	0.329	0.34
-7.42374	0.441	0.329	0.34
-7.41574	0.441	0.329	0.34
-7.40774	0.441	0.329	0.34
-7.39974	0.442	0.329	0.34
-7.39174	0.442	0.329	0.34
-7.38374	0.442	0.329	0.34
-7.37574	0.442	0.329	0.34
-7.36774	0.442	0.329	0.34
-7.35974	0.442	0.329	0.34
-7.35174	0.442	0.329	0.34
-7.34373	0.442	0.329	0.34
-7.33573	0.442	0.329	0.34
-7.32773	0.442	0.329	0.34
-7.31973	0.442	0.329	0.34
-7.31173	0.442	0.329	0.34
-7.30373	0.442	0.329	0.34
-7.29573	0.442	0.329	0.34
-7.28773	0.442	0.329	0.34
-7.27973	0.442	0.329	0.341
-7.27173	0.442	0.329	0.341
-7.26373	0.442	0.329	0.341
-7.25573	0.442	0.329	0.341
-7.24772	0.442	0.329	0.341
-7.23972	0.442	0.33	0.341
-7.23172	0.442	0.33	0.341
-7.22372	0.442	0.33	0.341
-7.21572	0.442	0.33	0.341
-7.20772	0.442	0.33	0.341
-7.19972	0.442	0.33	0.341
-7.19172	0.442	0.33	0.341
-7.18372	0.442	0.33	0.341
-7.17572	0.442	0.33	0.341
-7.16772	0.442	0.33	0.341
-7.15972	0.442	0.33	0.341
-7.15172	0.442	0.33	0.341
-7.14371	0.442	0.33	0.341
-7.13571	0.442	0.33	0.341
-7.12771	0.442	0.33	0.341
-7.11971	0.442	0.33	0.341
-7.11171	0.442	0.33	0.341
-7.10371	0.442	0.33	0.341
-7.09571	0.442	0.33	0.341
-7.08771	0.442	0.33	0.341
-7.07971	0.442	0.33	0.341
-7.07171	0.442	0.33	0.341
-7.06371	0.442	0.33	0.341
-7.05571	0.442	0.33	0.341
-7.0477	0.442	0.33	0.341
-7.0397	0.443	0.33	0.341
-7.0317	0.443	0.33	0.341
-7.0237	0.443	0.33	0.341
-7.0157	0.443	0.33	0.341
-7.0077	0.443	0.33	0.341
-6.9997	0.443	0.33	0.341
-6.9917	0.443	0.33	0.341
-6.9837	0.443	0.33	0.341
-6.9757	0.443	0.33	0.341
-6.9677	0.443	0.33	0.341
-6.9597	0.443	0.33	0.341
-6.9517	0.443	0.33	0.341
-6.94369	0.443	0.33	0.341
-6.93569	0.443	0.33	0.341
-6.92769	0.443	0.33	0.341
-6.91969	0.443	0.33	0.341
-6.91169	0.443	0.33	0.342
-6.90369	0.443	0.33	0.342
-6.89569	0.443	0.33	0.342
-6.88769	0.443	0.33	0.342
-6.87969	0.443	0.33	0.342
-6.87169	0.443	0.331	0.342
-6.86369	0.443	0.331	0.342
-6.85569	0.443	0.331	0.342
-6.84768	0.443	0.331	0.342
-6.83968	0.443	0.331	0.342
-6.83168	0.443	0.331	0.342
-6.82368	0.443	0.331	0.342
-6.81568	0.443	0.331	0.342
-6.80768	0.443	0.331	0.342
-6.79968	0.443	0.331	0.342
-6.79168	0.443	0.331	0.342
-6.78368	0.443	0.331	0.342
-6.77568	0.443	0.331	0.342
-6.76768	0.443	0.331	0.342
-6.75968	0.443	0.331	0.342
-6.75168	0.443	0.331	0.342
-6.74367	0.443	0.331	0.342
-6.73567	0.443	0.331	0.342
-6.72767	0.443	0.331	0.342
-6.71967	0.443	0.331	0.342
-6.71167	0.443	0.331	0.342
-6.70367	0.443	0.331	0.342
-6.69567	0.443	0.331	0.342
-6.68767	0.443	0.331	0.342
-6.67967	0.443	0.331	0.342
-6.67167	0.443	0.331	0.342
-6.66367	0.443	0.331	0.342
-6.65567	0.443	0.331	0.342
-6.64766	0.443	0.331	0.342
-6.63966	0.443	0.331	0.342
-6.63166	0.443	0.331	0.342
-6.62366	0.443	0.331	0.342
-6.61566	0.443	0.331	0.342
-6.60766	0.443	0.331	0.342
-6.59966	0.444	0.331	0.342
-6.59166	0.444	0.331	0.342
-6.58366	0.444	0.331	0.342
-6.57566	0.444	0.331	0.342
-6.56766	0.444	0.331	0.342
-6.55966	0.444	0.331	0.342
-6.55166	0.444	0.331	0.342
-6.54365	0.444	0.331	0.342
-6.53565	0.444	0.331	0.342
-6.52765	0.444	0.331	0.342
-6.51965	0.444	0.332	0.342
-6.51165	0.444	0.332	0.342
-6.50365	0.444	0.332	0.342
-6.49565	0.444	0.332	0.342
-6.48765	0.444	0.332	0.343
-6.47965	0.444	0.332	0.343
-6.47165	0.444	0.332	0.343
-6.46365	0.444	0.332	0.343
-6.45565	0.444	0.332	0.343
-6.44764	0.444	0.332	0.343
-6.43964	0.444	0.332	0.343
-6.43164	0.444	0.332	0.343
-6.42364	0.444	0.332	0.343
-6.41564	0.444	0.332	0.343
-6.40764	0.444	0.332	0.343
-6.39964	0.444	0.332	0.343
-6.39164	0.444	0.332	0.343
-6.38364	0.444	0.332	0.343
-6.37564	0.444	0.332	0.343
-6.36764	0.444	0.332	0.343
-6.35964	0.444	0.332	0.343
-6.35164	0.444	0.332	0.343
-6.34363	0.444	0.332	0.343
-6.33563	0.444	0.332	0.343
-6.32763	0.444	0.332	0.343
-6.31963	0.444	0.332	0.343
-6.31163	0.444	0.332	0.343
-6.30363	0.444	0.332	0.343
-6.29563	0.444	0.332	0.343
-6.28763	0.444	0.332	0.343
-6.27963	0.444	0.332	0.343
-6.27163	0.444	0.332	0.343
-6.26363	0.444	0.332	0.343
-6.25563	0.444	0.332	0.343
-6.24762	0.444	0.332	0.343
-6.23962	0.444	0.332	0.343
-6.23162	0.444	0.332	0.343
-6.22362	0.444	0.332	0.343
-6.21562	0.444	0.332	0.343
-6.20762	0.444	0.332	0.343
-6.19962	0.444	0.332	0.343
-6.19162	0.444	0.332	0.343
-6.18362	0.444	0.332	0.343
-6.17562	0.444	0.333	0.343
-6.16762	0.444	0.333	0.343
-6.15962	0.444	0.333	0.343
-6.15162	0.444	0.333	0.343
-6.14361	0.444	0.333	0.343
-6.13561	0.444	0.333	0.343
-6.12761	0.444	0.333	0.343
-6.11961	0.444	0.333	0.343
-6.11161	0.444	0.333	0.343
-6.10361	0.444	0.333	0.343
-6.09561	0.444	0.333	0.343
-6.08761	0.444	0.333	0.343
-6.07961	0.444	0.333	0.343
-6.07161	0.445	0.333	0.343
-6.06361	0.445	0.333	0.343
-6.05561	0.445	0.333	0.343
-6.0476	0.445	0.333	0.343
-6.0396	0.445	0.333	0.343
-6.0316	0.445	0.333	0.343
-6.0236	0.445	0.333	0.343
-6.0156	0.445	0.333	0.344
-6.0076	0.445	0.333	0.344
-5.9996	0.445	0.333	0.344
-5.9916	0.445	0.333	0.344
-5.9836	0.445	0.333	0.344
-5.9756	0.445	0.333	0.344
-5.9676	0.445	0.333	0.344
-5.9596	0.445	0.333	0.344
-5.9516	0.445	0.333	0.344
-5.94359	0.445	0.333	0.344
-5.93559	0.445	0.333	0.344
-5.92759	0.445	0.333	0.344
-5.91959	0.445	0.333	0.344
-5.91159	0.445	0.333	0.344
-5.90359	0.445	0.333	0.344
-5.89559	0.445	0.333	0.344
-5.88759	0.445	0.333	0.344
-5.87959	0.445	0.333	0.344
-5.87159	0.445	0.333	0.344
-5.86359	0.445	0.333	0.344
-5.85559	0.445	0.333	0.344
-5.84758	0.445	0.333	0.344
-5.83958	0.445	0.333	0.344
-5.83158	0.445	0.334	0.344
-5.82358	0.445	0.334	0.344
-5.81558	0.445	0.334	0.344
-5.80758	0.445	0.334	0.344
-5.79958	0.445	0.334	0.344
-5.79158	0.445	0.334	0.344
-5.78358	0.445	0.334	0.344
-5.77558	0.445	0.334	0.344
-5.76758	0.445	0.334	0.344
-5.75958	0.445	0.334	0.344
-5.75158	0.445	0.334	0.344
-5.74357	0.445	0.334	0.344
-5.73557	0.445	0.334	0.344
-5.72757	0.445	0.334	0.344
-5.71957	0.445	0.334	0.344
-5.71157	0.445	0.334	0.344
-5.70357	0.445	0.334	0.344
-5.69557	0.445	0.334	0.344
-5.68757	0.445	0.334	0.344
-5.67957	0.445	0.334	0.344
-5.67157	0.445	0.334	0.344
-5.66357	0.445	0.334	0.344
-5.65557	0.445	0.334	0.344
-5.64756	0.445	0.334	0.344
-5.63956	0.445	0.334	0.344
-5.63156	0.445	0.334	0.344
-5.62356	0.445	0.334	0.344
-5.61556	0.445	0.334	0.344
-5.60756	0.445	0.334	0.344
-5.59956	0.445	0.334	0.344
-5.59156	0.445	0.334	0.344
-5.58356	0.445	0.334	0.344
-5.57556	0.445	0.334	0.344
-5.56756	0.445	0.334	0.344
-5.55956	0.445	0.334	0.344
-5.55156	0.445	0.334	0.344
-5.54355	0.445	0.334	0.344
-5.53555	0.445	0.334	0.344
-5.52755	0.445	0.334	0.344
-5.51955	0.445	0.334	0.344
-5.51155	0.445	0.334	0.344
-5.50355	0.445	0.335	0.345
-5.49555	0.445	0.335	0.345
-5.48755	0.445	0.335	0.345
-5.47955	0.445	0.335	0.345
-5.47155	0.445	0.335	0.345
-5.46355	0.445	0.335	0.345
-5.45555	0.446	0.335	0.345
-5.44754	0.446	0.335	0.345
-5.43954	0.446	0.335	0.345
-5.43154	0.446	0.335	0.345
-5.42354	0.446	0.335	0.345
-5.41554	0.446	0.335	0.345
-5.40754	0.446	0.335	0.345
-5.39954	0.446	0.335	0.345
-5.39154	0.446	0.335	0.345
-5.38354	0.446	0.335	0.345
-5.37554	0.446	0.335	0.345
-5.36754	0.446	0.335	0.345
-5.35954	0.446	0.335	0.345
-5.35154	0.446	0.335	0.345
-5.34353	0.446	0.335	0.345
-5.33553	0.446	0.335	0.345
-5.32753	0.446	0.335	0.345
-5.31953	0.446	0.335	0.345
-5.31153	0.446	0.335	0.345
-5.30353	0.446	0.335	0.345
-5.29553	0.446	0.335	0.345
-5.28753	0.446	0.335	0.345
-5.27953	0.446	0.335	0.345
-5.27153	0.446	0.335	0.345
-5.26353	0.446	0.335	0.345
-5.25553	0.446	0.335	0.345
-5.24752	0.446	0.335	0.345
-5.23952	0.446	0.335	0.345
-5.23152	0.446	0.335	0.345
-5.22352	0.446	0.335	0.345
-5.21552	0.446	0.335	0.345
-5.20752	0.446	0.335	0.345
-5.19952	0.446	0.335	0.345
-5.19152	0.446	0.335	0.345
-5.18352	0.446	0.336	0.345
-5.17552	0.446	0.336	0.345
-5.16752	0.446	0.336	0.345
-5.15952	0.446	0.336	0.345
-5.15152	0.446	0.336	0.345
-5.14351	0.446	0.336	0.345
-5.13551	0.446	0.336	0.345
-5.12751	0.446	0.336	0.345
-5.11951	0.446	0.336	0.345
-5.11151	0.446	0.336	0.345
-5.10351	0.446	0.336	0.345
-5.09551	0.446	0.336	0.345
-5.08751	0.446	0.336	0.345
-5.07951	0.446	0.336	0.345
-5.07151	0.446	0.336	0.345
-5.06351	0.446	0.336	0.345
-5.05551	0.446	0.336	0.345
-5.0475	0.446	0.336	0.345
-5.0395	0.446	0.336	0.345
-5.0315	0.446	0.336	0.345
-5.0235	0.446	0.336	0.345
-5.0155	0.446	0.336	0.345
-5.0075	0.446	0.336	0.345
-4.9995	0.446	0.336	0.345
-4.9915	0.446	0.336	0.345
-4.9835	0.446	0.336	0.345
-4.9755	0.446	0.336	0.345
-4.9675	0.446	0.336	0.345
-4.9595	0.446	0.336	0.345
-4.9515	0.446	0.336	0.345
-4.94349	0.446	0.336	0.346
-4.93549	0.446	0.336	0.346
-4.92749	0.446	0.336	0.346
-4.91949	0.446	0.336	0.346
-4.91149	0.446	0.336	0.346
-4.90349	0.446	0.336	0.346
-4.89549	0.446	0.336	0.346
-4.88749	0.446	0.336	0.346
-4.87949	0.446	0.336	0.346
-4.87149	0.446	0.336	0.346
-4.86349	0.446	0.337	0.346
-4.85549	0.446	0.337	0.346
-4.84748	0.446	0.337	0.346
-4.83948	0.446	0.337	0.346
-4.83148	0.446	0.337	0.346
-4.82348	0.446	0.337	0.346
-4.81548	0.446	0.337	0.346
-4.80748	0.446	0.337	0.346
-4.79948	0.446	0.337	0.346
-4.79148	0.446	0.337	0.346
-4.78348	0.446	0.337	0.346
-4.77548	0.447	0.337	0.346
-4.76748	0.447	0.337	0.346
-4.75948	0.447	0.337	0.346
-4.75148	0.447	0.337	0.346
-4.74347	0.447	0.337	0.346
-4.73547	0.447	0.337	0.346
-4.72747	0.447	0.337	0.346
-4.71947	0.447	0.337	0.346
-4.71147	0.447	0.337	0.346
-4.70347	0.447	0.337	0.346
-4.69547	0.447	0.337	0.346
-4.68747	0.447	0.337	0.346
-4.67947	0.447	0.337	0.346
-4.67147	0.447	0.337	0.346
-4.66347	0.447	0.337	0.346
-4.65547	0.447	0.337	0.346
-4.64746	0.447	0.337	0.346
-4.63946	0.447	0.337	0.346
-4.63146	0.447	0.337	0.346
-4.62346	0.447	0.337	0.346
-4.61546	0.447	0.337	0.346
-4.60746	0.447	0.337	0.346
-4.59946	0.447	0.337	0.346
-4.59146	0.447	0.337	0.346
-4.58346	0.447	0.337	0.346
-4.57546	0.447	0.337	0.346
-4.56746	0.447	0.337	0.346
-4.55946	0.447	0.337	0.346
-4.55146	0.447	0.338	0.346
-4.54345	0.447	0.338	0.346
-4.53545	0.447	0.338	0.346
-4.52745	0.447	0.338	0.346
-4.51945	0.447	0.338	0.346
-4.51145	0.447	0.338	0.346
-4.50345	0.447	0.338	0.346
-4.49545	0.447	0.338	0.346
-4.48745	0.447	0.338	0.346
-4.47945	0.447	0.338	0.346
-4.47145	0.447	0.338	0.346
-4.46345	0.447	0.338	0.346
-4.45545	0.447	0.338	0.346
-4.44744	0.447	0.338	0.346
-4.43944	0.447	0.338	0.346
-4.43144	0.447	0.338	0.346
-4.42344	0.447	0.338	0.346
-4.41544	0.447	0.338	0.346
-4.40744	0.447	0.338	0.346
-4.39944	0.447	0.338	0.346
-4.39144	0.447	0.338	0.346
-4.38344	0.447	0.338	0.346
-4.37544	0.447	0.338	0.346
-4.36744	0.447	0.338	0.346
-4.35944	0.447	0.338	0.346
-4.35144	0.447	0.338	0.346
-4.34343	0.447	0.338	0.347
-4.33543	0.447	0.338	0.347
-4.32743	0.447	0.338	0.347
-4.31943	0.447	0.338	0.347
-4.31143	0.447	0.338	0.347
-4.30343	0.447	0.338	0.347
-4.29543	0.447	0.338	0.347
-4.28743	0.447	0.338	0.347
-4.27943	0.447	0.338	0.347
-4.27143	0.447	0.338	0.347
-4.26343	0.447	0.338	0.347
-4.25543	0.447	0.338	0.347
-4.24742	0.447	0.339	0.347
-4.23942	0.447	0.339	0.347
-4.23142	0.447	0.339	0.347
-4.22342	0.447	0.339	0.347
-4.21542	0.447	0.339	0.347
-4.20742	0.447	0.339	0.347
-4.19942	0.447	0.339	0.347
-4.19142	0.447	0.339	0.347
-4.18342	0.447	0.339	0.347
-4.17542	0.447	0.339	0.347
-4.16742	0.447	0.339	0.347
-4.15942	0.447	0.339	0.347
-4.15142	0.447	0.339	0.347
-4.14341	0.447	0.339	0.347
-4.13541	0.447	0.339	0.347
-4.12741	0.447	0.339	0.347
-4.11941	0.447	0.339	0.347
-4.11141	0.447	0.339	0.347
-4.10341	0.447	0.339	0.347
-4.09541	0.447	0.339	0.347
-4.08741	0.447	0.339	0.347
-4.07941	0.447	0.339	0.347
-4.07141	0.447	0.339	0.347
-4.06341	0.447	0.339	0.347
-4.05541	0.448	0.339	0.347
-4.0474	0.448	0.339	0.347
-4.0394	0.448	0.339	0.347
-4.0314	0.448	0.339	0.347
-4.0234	0.448	0.339	0.347
-4.0154	0.448	0.339	0.347
-4.0074	0.448	0.339	0.347
-3.9994	0.448	0.339	0.347
-3.9914	0.448	0.339	0.347
-3.9834	0.448	0.339	0.347
-3.9754	0.448	0.339	0.347
-3.9674	0.448	0.339	0.347
-3.9594	0.448	0.339	0.347
-3.9514	0.448	0.34	0.347
-3.94339	0.448	0.34	0.347
-3.93539	0.448	0.34	0.347
-3.92739	0.448	0.34	0.347
-3.91939	0.448	0.34	0.347
-3.91139	0.448	0.34	0.347
-3.90339	0.448	0.34	0.347
-3.89539	0.448	0.34	0.347
-3.88739	0.448	0.34	0.347
-3.87939	0.448	0.34	0.347
-3.87139	0.448	0.34	0.347
-3.86339	0.448	0.34	0.347
-3.85539	0.448	0.34	0.347
-3.84738	0.448	0.34	0.347
-3.83938	0.448	0.34	0.347
-3.83138	0.448	0.34	0.347
-3.82338	0.448	0.34	0.347
-3.81538	0.448	0.34	0.347
-3.80738	0.448	0.34	0.347
-3.79938	0.448	0.34	0.347
-3.79138	0.448	0.34	0.347
-3.78338	0.448	0.34	0.347
-3.77538	0.448	0.34	0.347
-3.76738	0.448	0.34	0.347
-3.75938	0.448	0.34	0.347
-3.75138	0.448	0.34	0.347
-3.74337	0.448	0.34	0.347
-3.73537	0.448	0.34	0.347
-3.72737	0.448	0.34	0.348
-3.71937	0.448	0.34	0.348
-3.71137	0.448	0.34	0.348
-3.70337	0.448	0.34	0.348
-3.69537	0.448	0.34	0.348
-3.68737	0.448	0.34	0.348
-3.67937	0.448	0.34	0.348
-3.67137	0.448	0.34	0.348
-3.66337	0.448	0.34	0.348
-3.65537	0.448	0.341	0.348
-3.64736	0.448	0.341	0.348
-3.63936	0.448	0.341	0.348
-3.63136	0.448	0.341	0.348
-3.62336	0.448	0.341	0.348
-3.61536	0.448	0.341	0.348
-3.60736	0.448	0.341	0.348
-3.59936	0.448	0.341	0.348
-3.59136	0.448	0.341	0.348
-3.58336	0.448	0.341	0.348
-3.57536	0.448	0.341	0.348
-3.56736	0.448	0.341	0.348
-3.55936	0.448	0.341	0.348
-3.55136	0.448	0.341	0.348
-3.54335	0.448	0.341	0.348
-3.53535	0.448	0.341	0.348
-3.52735	0.448	0.341	0.348
-3.51935	0.448	0.341	0.348
-3.51135	0.448	0.341	0.348
-3.50335	0.448	0.341	0.348
-3.49535	0.448	0.341	0.348
-3.48735	0.448	0.341	0.348
-3.47935	0.448	0.341	0.348
-3.47135	0.448	0.341	0.348
-3.46335	0.448	0.341	0.348
-3.45535	0.448	0.341	0.348
-3.44734	0.448	0.341	0.348
-3.43934	0.448	0.341	0.348
-3.43134	0.448	0.341	0.348
-3.42334	0.448	0.341	0.348
-3.41534	0.448	0.341	0.348
-3.40734	0.448	0.341	0.348
-3.39934	0.448	0.341	0.348
-3.39134	0.448	0.341	0.348
-3.38334	0.448	0.341	0.348
-3.37534	0.448	0.341	0.348
-3.36734	0.448	0.342	0.348
-3.35934	0.448	0.342	0.348
-3.35134	0.448	0.342	0.348
-3.34333	0.448	0.342	0.348
-3.33533	0.448	0.342	0.348
-3.32733	0.448	0.342	0.348
-3.31933	0.448	0.342	0.348
-3.31133	0.449	0.342	0.348
-3.30333	0.449	0.342	0.348
-3.29533	0.449	0.342	0.348
-3.28733	0.449	0.342	0.348
-3.27933	0.449	0.342	0.348
-3.27133	0.449	0.342	0.348
-3.26333	0.449	0.342	0.348
-3.25533	0.449	0.342	0.348
-3.24732	0.449	0.342	0.348
-3.23932	0.449	0.342	0.348
-3.23132	0.449	0.342	0.348
-3.22332	0.449	0.342	0.348
-3.21532	0.449	0.342	0.348
-3.20732	0.449	0.342	0.348
-3.19932	0.449	0.342	0.348
-3.19132	0.449	0.342	0.348
-3.18332	0.449	0.342	0.348
-3.17532	0.449	0.342	0.348
-3.16732	0.449	0.342	0.348
-3.15932	0.449	0.342	0.348
-3.15132	0.449	0.342	0.348
-3.14331	0.449	0.342	0.348
-3.13531	0.449	0.342	0.348
-3.12731	0.449	0.342	0.348
-3.11931	0.449	0.342	0.348
-3.11131	0.449	0.342	0.348
-3.10331	0.449	0.342	0.348
-3.09531	0.449	0.342	0.348
-3.08731	0.449	0.342	0.348
-3.07931	0.449	0.343	0.349
-3.07131	0.449	0.343	0.349
-3.06331	0.449	0.343	0.349
-3.05531	0.449	0.343	0.349
-3.0473	0.449	0.343	0.349
-3.0393	0.449	0.343	0.349
-3.0313	0.449	0.343	0.349
-3.0233	0.449	0.343	0.349
-3.0153	0.449	0.343	0.349
-3.0073	0.449	0.343	0.349
-2.9993	0.449	0.343	0.349
-2.9913	0.449	0.343	0.349
-2.9833	0.449	0.343	0.349
-2.9753	0.449	0.343	0.349
-2.9673	0.449	0.343	0.349
-2.9593	0.449	0.343	0.349
-2.9513	0.449	0.343	0.349
-2.94329	0.449	0.343	0.349
-2.93529	0.449	0.343	0.349
-2.92729	0.449	0.343	0.349
-2.91929	0.449	0.343	0.349
-2.91129	0.449	0.343	0.349
-2.90329	0.449	0.343	0.349
-2.89529	0.449	0.343	0.349
-2.88729	0.449	0.343	0.349
-2.87929	0.449	0.343	0.349
-2.87129	0.449	0.343	0.349
-2.86329	0.449	0.343	0.349
-2.85529	0.449	0.343	0.349
-2.84728	0.449	0.343	0.349
-2.83928	0.449	0.343	0.349
-2.83128	0.449	0.343	0.349
-2.82328	0.449	0.343	0.349
-2.81528	0.449	0.343	0.349
-2.80728	0.449	0.343	0.349
-2.79928	0.449	0.344	0.349
-2.79128	0.449	0.344	0.349
-2.78328	0.449	0.344	0.349
-2.77528	0.449	0.344	0.349
-2.76728	0.449	0.344	0.349
-2.75928	0.449	0.344	0.349
-2.75128	0.449	0.344	0.349
-2.74327	0.449	0.344	0.349
-2.73527	0.449	0.344	0.349
-2.72727	0.449	0.344	0.349
-2.71927	0.449	0.344	0.349
-2.71127	0.449	0.344	0.349
-2.70327	0.449	0.344	0.349
-2.69527	0.449	0.344	0.349
-2.68727	0.449	0.344	0.349
-2.67927	0.449	0.344	0.349
-2.67127	0.449	0.344	0.349
-2.66327	0.449	0.344	0.349
-2.65527	0.449	0.344	0.349
-2.64726	0.449	0.344	0.349
-2.63926	0.449	0.344	0.349
-2.63126	0.449	0.344	0.349
-2.62326	0.449	0.344	0.349
-2.61526	0.449	0.344	0.349
-2.60726	0.449	0.344	0.349
-2.59926	0.449	0.344	0.349
-2.59126	0.449	0.344	0.349
-2.58326	0.449	0.344	0.349
-2.57526	0.449	0.344	0.349
-2.56726	0.449	0.344	0.349
-2.55926	0.45	0.344	0.349
-2.55126	0.45	0.344	0.349
-2.54325	0.45	0.344	0.349
-2.53525	0.45	0.344	0.349
-2.52725	0.45	0.345	0.349
-2.51925	0.45	0.345	0.349
-2.51125	0.45	0.345	0.349
-2.50325	0.45	0.345	0.349
-2.49525	0.45	0.345	0.349
-2.48725	0.45	0.345	0.349
-2.47925	0.45	0.345	0.349
-2.47125	0.45	0.345	0.349
-2.46325	0.45	0.345	0.349
-2.45525	0.45	0.345	0.349
-2.44724	0.45	0.345	0.349
-2.43924	0.45	0.345	0.349
-2.43124	0.45	0.345	0.349
-2.42324	0.45	0.345	0.349
-2.41524	0.45	0.345	0.35
-2.40724	0.45	0.345	0.35
-2.39924	0.45	0.345	0.35
-2.39124	0.45	0.345	0.35
-2.38324	0.45	0.345	0.35
-2.37524	0.45	0.345	0.35
-2.36724	0.45	0.345	0.35
-2.35924	0.45	0.345	0.35
-2.35124	0.45	0.345	0.35
-2.34323	0.45	0.345	0.35
-2.33523	0.45	0.345	0.35
-2.32723	0.45	0.345	0.35
-2.31923	0.45	0.345	0.35
-2.31123	0.45	0.345	0.35
-2.30323	0.45	0.345	0.35
-2.29523	0.45	0.345	0.35
-2.28723	0.45	0.345	0.35
-2.27923	0.45	0.345	0.35
-2.27123	0.45	0.345	0.35
-2.26323	0.45	0.345	0.35
-2.25523	0.45	0.345	0.35
-2.24722	0.45	0.346	0.35
-2.23922	0.45	0.346	0.35
-2.23122	0.45	0.346	0.35
-2.22322	0.45	0.346	0.35
-2.21522	0.45	0.346	0.35
-2.20722	0.45	0.346	0.35
-2.19922	0.45	0.346	0.35
-2.19122	0.45	0.346	0.35
-2.18322	0.45	0.346	0.35
-2.17522	0.45	0.346	0.35
-2.16722	0.45	0.346	0.35
-2.15922	0.45	0.346	0.35
-2.15122	0.45	0.346	0.35
-2.14321	0.45	0.346	0.35
-2.13521	0.45	0.346	0.35
-2.12721	0.45	0.346	0.35
-2.11921	0.45	0.346	0.35
-2.11121	0.45	0.346	0.35
-2.10321	0.45	0.346	0.35
-2.09521	0.45	0.346	0.35
-2.08721	0.45	0.346	0.35
-2.07921	0.45	0.346	0.35
-2.07121	0.45	0.346	0.35
-2.06321	0.45	0.346	0.35
-2.05521	0.45	0.346	0.35
-2.0472	0.45	0.346	0.35
-2.0392	0.45	0.346	0.35
-2.0312	0.45	0.346	0.35
-2.0232	0.45	0.346	0.35
-2.0152	0.45	0.346	0.35
-2.0072	0.45	0.346	0.35
-1.9992	0.45	0.346	0.35
-1.9912	0.45	0.346	0.35
-1.9832	0.45	0.346	0.35
-1.9752	0.45	0.347	0.35
-1.9672	0.45	0.347	0.35
-1.9592	0.45	0.347	0.35
-1.9512	0.45	0.347	0.35
-1.94319	0.45	0.347	0.35
-1.93519	0.45	0.347	0.35
-1.92719	0.45	0.347	0.35
-1.91919	0.45	0.347	0.35
-1.91119	0.45	0.347	0.35
-1.90319	0.45	0.347	0.35
-1.89519	0.45	0.347	0.35
-1.88719	0.45	0.347	0.35
-1.87919	0.45	0.347	0.35
-1.87119	0.45	0.347	0.35
-1.86319	0.45	0.347	0.35
-1.85519	0.45	0.347	0.35
-1.84718	0.45	0.347	0.35
-1.83918	0.45	0.347	0.35
-1.83118	0.45	0.347	0.35
-1.82318	0.45	0.347	0.35
-1.81518	0.45	0.347	0.35
-1.80718	0.451	0.347	0.35
-1.79918	0.451	0.347	0.35
-1.79118	0.451	0.347	0.35
-1.78318	0.451	0.347	0.35
-1.77518	0.451	0.347	0.35
-1.76718	0.451	0.347	0.35
-1.75918	0.451	0.347	0.35
-1.75118	0.451	0.347	0.35
-1.74317	0.451	0.347	0.35
-1.73517	0.451	0.347	0.351
-1.72717	0.451	0.347	0.351
-1.71917	0.451	0.347	0.351
-1.71117	0.451	0.348	0.351
-1.70317	0.451	0.348	0.351
-1.69517	0.451	0.348	0.351
-1.68717	0.451	0.348	0.351
-1.67917	0.451	0.348	0.351
-1.67117	0.451	0.348	0.351
-1.66317	0.451	0.348	0.351
-1.65517	0.451	0.348	0.351
-1.64716	0.451	0.348	0.351
-1.63916	0.451	0.348	0.351
-1.63116	0.451	0.348	0.351
-1.62316	0.451	0.348	0.351
-1.61516	0.451	0.348	0.351
-1.60716	0.451	0.348	0.351
-1.59916	0.451	0.348	0.351
-1.59116	0.451	0.348	0.351
-1.58316	0.451	0.348	0.351
-1.57516	0.451	0.348	0.351
-1.56716	0.451	0.348	0.351
-1.55916	0.451	0.348	0.351
-1.55116	0.451	0.348	0.351
-1.54315	0.451	0.348	0.351
-1.53515	0.451	0.348	0.351
-1.52715	0.451	0.348	0.351
-1.51915	0.451	0.348	0.351
-1.51115	0.451	0.348	0.351
-1.50315	0.451	0.348	0.351
-1.49515	0.451	0.348	0.351
-1.48715	0.451	0.348	0.351
-1.47915	0.451	0.348	0.351
-1.47115	0.451	0.348	0.351
-1.46315	0.451	0.348	0.351
-1.45515	0.451	0.348	0.351
-1.44714	0.451	0.349	0.351
-1.43914	0.451	0.349	0.351
-1.43114	0.451	0.349	0.351
-1.42314	0.451	0.349	0.351
-1.41514	0.451	0.349	0.351
-1.40714	0.451	0.349	0.351
-1.39914	0.451	0.349	0.351
-1.39114	0.451	0.349	0.351
-1.38314	0.451	0.349	0.351
-1.37514	0.451	0.349	0.351
-1.36714	0.451	0.349	0.351
-1.35914	0.451	0.349	0.351
-1.35114	0.451	0.349	0.351
-1.34313	0.451	0.349	0.351
-1.33513	0.451	0.349	0.351
-1.32713	0.451	0.349	0.351
-1.31913	0.451	0.349	0.351
-1.31113	0.451	0.349	0.351
-1.30313	0.451	0.349	0.351
-1.29513	0.451	0.349	0.351
-1.28713	0.451	0.349	0.351
-1.27913	0.451	0.349	0.351
-1.27113	0.451	0.349	0.351
-1.26313	0.451	0.349	0.351
-1.25513	0.451	0.349	0.351
-1.24712	0.451	0.349	0.351
-1.23912	0.451	0.349	0.351
-1.23112	0.451	0.349	0.351
-1.22312	0.451	0.349	0.351
-1.21512	0.451	0.349	0.351
-1.20712	0.451	0.349	0.351
-1.19912	0.451	0.349	0.351
-1.19112	0.451	0.349	0.351
-1.18312	0.451	0.35	0.351
-1.17512	0.451	0.35	0.351
-1.16712	0.451	0.35	0.351
-1.15912	0.451	0.35	0.351
-1.15112	0.451	0.35	0.351
-1.14311	0.451	0.35	0.351
-1.13511	0.451	0.35	0.351
-1.12711	0.451	0.35	0.351
-1.11911	0.451	0.35	0.351
-1.11111	0.451	0.35	0.351
-1.10311	0.451	0.35	0.351
-1.09511	0.451	0.35	0.351
-1.08711	0.451	0.35	0.351
-1.07911	0.451	0.35	0.351
-1.07111	0.451	0.35	0.351
-1.06311	0.451	0.35	0.351
-1.05511	0.452	0.35	0.351
-1.0471	0.452	0.35	0.351
-1.0391	0.452	0.35	0.352
-1.0311	0.452	0.35	0.352
-1.0231	0.452	0.35	0.352
-1.0151	0.452	0.35	0.352
-1.0071	0.452	0.35	0.352
-0.9991	0.452	0.35	0.352
-0.991099	0.452	0.35	0.352
-0.983098	0.452	0.35	0.352
-0.975098	0.452	0.35	0.352
-0.967097	0.452	0.35	0.352
-0.959096	0.452	0.35	0.352
-0.951095	0.452	0.35	0.352
-0.943094	0.452	0.35	0.352
-0.935094	0.452	0.35	0.352
-0.927093	0.452	0.351	0.352
-0.919092	0.452	0.351	0.352
-0.911091	0.452	0.351	0.352
-0.90309	0.452	0.351	0.352
-0.89509	0.452	0.351	0.352
-0.887089	0.452	0.351	0.352
-0.879088	0.452	0.351	0.352
-0.871087	0.452	0.351	0.352
-0.863086	0.452	0.351	0.352
-0.855086	0.452	0.351	0.352
-0.847085	0.452	0.351	0.352
-0.839084	0.452	0.351	0.352
-0.831083	0.452	0.351	0.352
-0.823082	0.452	0.351	0.352
-0.815082	0.452	0.351	0.352
-0.807081	0.452	0.351	0.352
-0.79908	0.452	0.351	0.352
-0.791079	0.452	0.351	0.352
-0.783078	0.452	0.351	0.352
-0.775078	0.452	0.351	0.352
-0.767077	0.452	0.351	0.352
-0.759076	0.452	0.351	0.352
-0.751075	0.452	0.351	0.352
-0.743074	0.452	0.351	0.352
-0.735074	0.452	0.351	0.352
-0.727073	0.452	0.351	0.352
-0.719072	0.452	0.351	0.352
-0.711071	0.452	0.351	0.352
-0.70307	0.452	0.351	0.352
-0.69507	0.452	0.351	0.352
-0.687069	0.452	0.351	0.352
-0.679068	0.452	0.351	0.352
-0.671067	0.452	0.352	0.352
-0.663066	0.452	0.352	0.352
-0.655066	0.452	0.352	0.352
-0.647065	0.452	0.352	0.352
-0.639064	0.452	0.352	0.352
-0.631063	0.452	0.352	0.352
-0.623062	0.452	0.352	0.352
-0.615062	0.452	0.352	0.352
-0.607061	0.452	0.352	0.352
-0.59906	0.452	0.352	0.352
-0.591059	0.452	0.352	0.352
-0.583058	0.452	0.352	0.352
-0.575058	0.452	0.352	0.352
-0.567057	0.452	0.352	0.352
-0.559056	0.452	0.352	0.352
-0.551055	0.452	0.352	0.352
-0.543054	0.452	0.352	0.352
-0.535054	0.452	0.352	0.352
-0.527053	0.452	0.352	0.352
-0.519052	0.452	0.352	0.352
-0.511051	0.452	0.352	0.352
-0.50305	0.452	0.352	0.352
-0.49505	0.452	0.352	0.352
-0.487049	0.452	0.352	0.352
-0.479048	0.452	0.352	0.352
-0.471047	0.452	0.352	0.352
-0.463046	0.452	0.352	0.352
-0.455046	0.452	0.352	0.352
-0.447045	0.452	0.352	0.352
-0.439044	0.452	0.352	0.352
-0.431043	0.452	0.352	0.352
-0.423042	0.452	0.352	0.352
-0.415042	0.452	0.353	0.352
-0.407041	0.452	0.353	0.352
-0.39904	0.452	0.353	0.352
-0.391039	0.452	0.353	0.352
-0.383038	0.452	0.353	0.352
-0.375038	0.452	0.353	0.352
-0.367037	0.452	0.353	0.352
-0.359036	0.452	0.353	0.352
-0.351035	0.452	0.353	0.352
-0.343034	0.452	0.353	0.352
-0.335034	0.452	0.353	0.352
-0.327033	0.452	0.353	0.353
-0.319032	0.452	0.353	0.353
-0.311031	0.453	0.353	0.353
-0.30303	0.453	0.353	0.353
-0.29503	0.453	0.353	0.353
-0.287029	0.453	0.353	0.353
-0.279028	0.453	0.353	0.353
-0.271027	0.453	0.353	0.353
-0.263026	0.453	0.353	0.353
-0.255026	0.453	0.353	0.353
-0.247025	0.453	0.353	0.353
-0.239024	0.453	0.353	0.353
-0.231023	0.453	0.353	0.353
-0.223022	0.453	0.353	0.353
-0.215022	0.453	0.353	0.353
-0.207021	0.453	0.353	0.353
-0.19902	0.453	0.353	0.353
-0.191019	0.453	0.353	0.353
-0.183018	0.453	0.353	0.353
-0.175018	0.453	0.353	0.353
-0.167017	0.453	0.353	0.353
-0.159016	0.453	0.354	0.353
-0.151015	0.453	0.354	0.353
-0.143014	0.453	0.354	0.353
-0.135014	0.453	0.354	0.353
-0.127013	0.453	0.354	0.353
-0.119012	0.453	0.354	0.353
-0.111011	0.453	0.354	0.353
-0.10301	0.453	0.354	0.353
-0.0950095	0.453	0.354	0.353
-0.0870087	0.453	0.354	0.353
-0.0790079	0.453	0.354	0.353
-0.0710071	0.453	0.354	0.353
-0.0630063	0.453	0.354	0.353
-0.0550055	0.453	0.354	0.353
-0.0470047	0.453	0.354	0.353
-0.0390039	0.453	0.354	0.353
-0.0310031	0.453	0.354	0.353
-0.0230023	0.453	0.354	0.353
-0.0150015	0.453	0.354	0.353
-0.0070007	0.453	0.354	0.353
0.0010001	0.453	0.354	0.353
0.0090009	0.453	0.354	0.353
0.0170017	0.453	0.354	0.353
0.0250025	0.453	0.354	0.353
0.0330033	0.453	0.354	0.353
0.0410041	0.453	0.354	0.353
0.0490049	0.453	0.354	0.353
0.0570057	0.453	0.354	0.353
0.0650065	0.453	0.354	0.353
0.0730073	0.453	0.354	0.353
0.0810081	0.453	0.354	0.353
0.0890089	0.453	0.355	0.353
0.0970097	0.453	0.355	0.353
0.105011	0.453	0.355	0.353
0.113011	0.453	0.355	0.353
0.121012	0.453	0.355	0.353
0.129013	0.453	0.355	0.353
0.137014	0.453	0.355	0.353
0.145015	0.453	0.355	0.353
0.153015	0.453	0.355	0.353
0.161016	0.453	0.355	0.353
0.169017	0.453	0.355	0.353
0.177018	0.453	0.355	0.353
0.185019	0.453	0.355	0.353
0.193019	0.453	0.355	0.353
0.20102	0.453	0.355	0.353
0.209021	0.453	0.355	0.353
0.217022	0.453	0.355	0.353
0.225023	0.453	0.355	0.353
0.233023	0.453	0.355	0.353
0.241024	0.453	0.355	0.353
0.249025	0.453	0.355	0.353
0.257026	0.453	0.355	0.353
0.265027	0.453	0.355	0.353
0.273027	0.453	0.355	0.353
0.281028	0.453	0.355	0.353
0.289029	0.453	0.355	0.353
0.29703	0.453	0.355	0.353
0.305031	0.453	0.355	0.353
0.313031	0.453	0.355	0.353
0.321032	0.453	0.355	0.353
0.329033	0.453	0.355	0.353
0.337034	0.453	0.356	0.353
0.345035	0.453	0.356	0.353
0.353035	0.453	0.356	0.353
0.361036	0.453	0.356	0.353
0.369037	0.453	0.356	0.353
0.377038	0.453	0.356	0.353
0.385039	0.453	0.356	0.353
0.393039	0.453	0.356	0.354
0.40104	0.453	0.356	0.354
0.409041	0.453	0.356	0.354
0.417042	0.453	0.356	0.354
0.425043	0.453	0.356	0.354
0.433043	0.453	0.356	0.354
0.441044	0.454	0.356	0.354
0.449045	0.454	0.356	0.354
0.457046	0.454	0.356	0.354
0.465047	0.454	0.356	0.354
0.473047	0.454	0.356	0.354
0.481048	0.454	0.356	0.354
0.489049	0.454	0.356	0.354
0.49705	0.454	0.356	0.354
0.505051	0.454	0.356	0.354
0.513051	0.454	0.356	0.354
0.521052	0.454	0.356	0.354
0.529053	0.454	0.356	0.354
0.537054	0.454	0.356	0.354
0.545055	0.454	0.356	0.354
0.553055	0.454	0.356	0.354
0.561056	0.454	0.356	0.354
0.569057	0.454	0.356	0.354
0.577058	0.454	0.356	0.354
0.585059	0.454	0.357	0.354
0.593059	0.454	0.357	0.354
0.60106	0.454	0.357	0.354
0.609061	0.454	0.357	0.354
0.617062	0.454	0.357	0.354
0.625063	0.454	0.357	0.354
0.633063	0.454	0.357	0.354
0.641064	0.454	0.357	0.354
0.649065	0.454	0.357	0.354
0.657066	0.454	0.357	0.354
0.665067	0.454	0.357	0.354
0.673067	0.454	0.357	0.354
0.681068	0.454	0.357	0.354
0.689069	0.454	0.357	0.354
0.69707	0.454	0.357	0.354
0.705071	0.454	0.357	0.354
0.713071	0.454	0.357	0.354
0.721072	0.454	0.357	0.354
0.729073	0.454	0.357	0.354
0.737074	0.454	0.357	0.354
0.745075	0.454	0.357	0.354
0.753075	0.454	0.357	0.354
0.761076	0.454	0.357	0.354
0.769077	0.454	0.357	0.354
0.777078	0.454	0.357	0.354
0.785079	0.454	0.357	0.354
0.793079	0.454	0.357	0.354
0.80108	0.454	0.357	0.354
0.809081	0.454	0.357	0.354
0.817082	0.454	0.357	0.354
0.825083	0.454	0.358	0.354
0.833083	0.454	0.358	0.354
0.841084	0.454	0.358	0.354
0.849085	0.454	0.358	0.354
0.857086	0.454	0.358	0.354
0.865087	0.454	0.358	0.354
0.873087	0.454	0.358	0.354
0.881088	0.454	0.358	0.354
0.889089	0.454	0.358	0.354
0.89709	0.454	0.358	0.354
0.905091	0.454	0.358	0.354
0.913091	0.454	0.358	0.354
0.921092	0.454	0.358	0.354
0.929093	0.454	0.358	0.354
0.937094	0.454	0.358	0.354
0.945095	0.454	0.358	0.354
0.953095	0.454	0.358	0.354
0.961096	0.454	0.358	0.354
0.969097	0.454	0.358	0.354
0.977098	0.454	0.358	0.354
0.985099	0.454	0.358	0.354
0.993099	0.454	0.358	0.354
1.0011	0.454	0.358	0.354
1.0091	0.454	0.358	0.354
1.0171	0.454	0.358	0.354
1.0251	0.454	0.358	0.354
1.0331	0.454	0.358	0.354
1.0411	0.454	0.358	0.354
1.0491	0.454	0.358	0.354
1.05711	0.454	0.358	0.354
1.06511	0.454	0.358	0.354
1.07311	0.454	0.359	0.354
1.08111	0.454	0.359	0.354
1.08911	0.454	0.359	0.354
1.09711	0.454	0.359	0.354
1.10511	0.454	0.359	0.354
1.11311	0.454	0.359	0.354
1.12111	0.454	0.359	0.354
1.12911	0.454	0.359	0.355
1.13711	0.454	0.359	0.355
1.14511	0.454	0.359	0.355
1.15312	0.454	0.359	0.355
1.16112	0.454	0.359	0.355
1.16912	0.454	0.359	0.355
1.17712	0.454	0.359	0.355
1.18512	0.455	0.359	0.355
1.19312	0.455	0.359	0.355
1.20112	0.455	0.359	0.355
1.20912	0.455	0.359	0.355
1.21712	0.455	0.359	0.355
1.22512	0.455	0.359	0.355
1.23312	0.455	0.359	0.355
1.24112	0.455	0.359	0.355
1.24912	0.455	0.359	0.355
1.25713	0.455	0.359	0.355
1.26513	0.455	0.359	0.355
1.27313	0.455	0.359	0.355
1.28113	0.455	0.359	0.355
1.28913	0.455	0.359	0.355
1.29713	0.455	0.359	0.355
1.30513	0.455	0.359	0.355
1.31313	0.455	0.36	0.355
1.32113	0.455	0.36	0.355
1.32913	0.455	0.36	0.355
1.33713	0.455	0.36	0.355
1.34513	0.455	0.36	0.355
1.35314	0.455	0.36	0.355
1.36114	0.455	0.36	0.355
1.36914	0.455	0.36	0.355
1.37714	0.455	0.36	0.355
1.38514	0.455	0.36	0.355
1.39314	0.455	0.36	0.355
1.40114	0.455	0.36	0.355
1.40914	0.455	0.36	0.355
1.41714	0.455	0.36	0.355
1.42514	0.455	0.36	0.355
1.43314	0.455	0.36	0.355
1.44114	0.455	0.36	0.355
1.44914	0.455	0.36	0.355
1.45715	0.455	0.36	0.355
1.46515	0.455	0.36	0.355
1.47315	0.455	0.36	0.355
1.48115	0.455	0.36	0.355
1.48915	0.455	0.36	0.355
1.49715	0.455	0.36	0.355
1.50515	0.455	0.36	0.355
1.51315	0.455	0.36	0.355
1.52115	0.455	0.36	0.355
1.52915	0.455	0.36	0.355
1.53715	0.455	0.36	0.355
1.54515	0.455	0.36	0.355
1.55316	0.455	0.361	0.355
1.56116	0.455	0.361	0.355
1.56916	0.455	0.361	0.355
1.57716	0.455	0.361	0.355
1.58516	0.455	0.361	0.355
1.59316	0.455	0.361	0.355
1.60116	0.455	0.361	0.355
1.60916	0.455	0.361	0.355
1.61716	0.455	0.361	0.355
1.62516	0.455	0.361	0.355
1.63316	0.455	0.361	0.355
1.64116	0.455	0.361	0.355
1.64916	0.455	0.361	0.355
1.65717	0.455	0.361	0.355
1.66517	0.455	0.361	0.355
1.67317	0.455	0.361	0.355
1.68117	0.455	0.361	0.355
1.68917	0.455	0.361	0.355
1.69717	0.455	0.361	0.355
1.70517	0.455	0.361	0.355
1.71317	0.455	0.361	0.355
1.72117	0.455	0.361	0.355
1.72917	0.455	0.361	0.355
1.73717	0.455	0.361	0.355
1.74517	0.455	0.361	0.355
1.75318	0.455	0.361	0.355
1.76118	0.455	0.361	0.355
1.76918	0.455	0.361	0.355
1.77718	0.455	0.361	0.355
1.78518	0.455	0.362	0.355
1.79318	0.455	0.362	0.355
1.80118	0.455	0.362	0.355
1.80918	0.455	0.362	0.355
1.81718	0.455	0.362	0.355
1.82518	0.455	0.362	0.355
1.83318	0.455	0.362	0.355
1.84118	0.455	0.362	0.355
1.84918	0.455	0.362	0.355
1.85719	0.455	0.362	0.355
1.86519	0.455	0.362	0.355
1.87319	0.455	0.362	0.355
1.88119	0.455	0.362	0.356
1.88919	0.455	0.362	0.356
1.89719	0.455	0.362	0.356
1.90519	0.455	0.362	0.356
1.91319	0.455	0.362	0.356
1.92119	0.455	0.362	0.356
1.92919	0.455	0.362	0.356
1.93719	0.456	0.362	0.356
1.94519	0.456	0.362	0.356
1.9532	0.456	0.362	0.356
1.9612	0.456	0.362	0.356
1.9692	0.456	0.362	0.356
1.9772	0.456	0.362	0.356
1.9852	0.456	0.362	0.356
1.9932	0.456	0.362	0.356
2.0012	0.456	0.362	0.356
2.0092	0.456	0.362	0.356
2.0172	0.456	0.362	0.356
2.0252	0.456	0.363	0.356
2.0332	0.456	0.363	0.356
2.0412	0.456	0.363	0.356
2.0492	0.456	0.363	0.356
2.05721	0.456	0.363	0.356
2.06521	0.456	0.363	0.356
2.07321	0.456	0.363	0.356
2.08121	0.456	0.363	0.356
2.08921	0.456	0.363	0.356
2.09721	0.456	0.363	0.356
2.10521	0.456	0.363	0.356
2.11321	0.456	0.363	0.356
2.12121	0.456	0.363	0.356
2.12921	0.456	0.363	0.356
2.13721	0.456	0.363	0.356
2.14521	0.456	0.363	0.356
2.15322	0.456	0.363	0.356
2.16122	0.456	0.363	0.356
2.16922	0.456	0.363	0.356
2.17722	0.456	0.363	0.356
2.18522	0.456	0.363	0.356
2.19322	0.456	0.363	0.356
2.20122	0.456	0.363	0.356
2.20922	0.456	0.363	0.356
2.21722	0.456	0.363	0.356
2.22522	0.456	0.363	0.356
2.23322	0.456	0.363	0.356
2.24122	0.456	0.363	0.356
2.24922	0.456	0.363	0.356
2.25723	0.456	0.364	0.356
2.26523	0.456	0.364	0.356
2.27323	0.456	0.364	0.356
2.28123	0.456	0.364	0.356
2.28923	0.456	0.364	0.356
2.29723	0.456	0.364	0.356
2.30523	0.456	0.364	0.356
2.31323	0.456	0.364	0.356
2.32123	0.456	0.364	0.356
2.32923	0.456	0.364	0.356
2.33723	0.456	0.364	0.356
2.34523	0.456	0.364	0.356
2.35324	0.456	0.364	0.356
2.36124	0.456	0.364	0.356
2.36924	0.456	0.364	0.356
2.37724	0.456	0.364	0.356
2.38524	0.456	0.364	0.356
2.39324	0.456	0.364	0.356
2.40124	0.456	0.364	0.356
2.40924	0.456	0.364	0.356
2.41724	0.456	0.364	0.356
2.42524	0.456	0.364	0.356
2.43324	0.456	0.364	0.356
2.44124	0.456	0.364	0.356
2.44924	0.456	0.364	0.356
2.45725	0.456	0.364	0.356
2.46525	0.456	0.364	0.356
2.47325	0.456	0.364	0.356
2.48125	0.456	0.364	0.356
2.48925	0.456	0.365	0.356
2.49725	0.456	0.365	0.356
2.50525	0.456	0.365	0.356
2.51325	0.456	0.365	0.356
2.52125	0.456	0.365	0.356
2.52925	0.456	0.365	0.356
2.53725	0.456	0.365	0.356
2.54525	0.456	0.365	0.356
2.55326	0.456	0.365	0.356
2.56126	0.456	0.365	0.356
2.56926	0.456	0.365	0.356
2.57726	0.456	0.365	0.356
2.58526	0.456	0.365	0.356
2.59326	0.456	0.365	0.356
2.60126	0.456	0.365	0.356
2.60926	0.456	0.365	0.356
2.61726	0.456	0.365	0.356
2.62526	0.456	0.365	0.356
2.63326	0.456	0.365	0.356
2.64126	0.456	0.365	0.356
2.64926	0.456	0.365	0.357
2.65727	0.456	0.365	0.357
2.66527	0.456	0.365	0.357
2.67327	0.456	0.365	0.357
2.68127	0.456	0.365	0.357
2.68927	0.457	0.365	0.357
2.69727	0.457	0.365	0.357
2.70527	0.457	0.365	0.357
2.71327	0.457	0.365	0.357
2.72127	0.457	0.366	0.357
2.72927	0.457	0.366	0.357
2.73727	0.457	0.366	0.357
2.74527	0.457	0.366	0.357
2.75328	0.457	0.366	0.357
2.76128	0.457	0.366	0.357
2.76928	0.457	0.366	0.357
2.77728	0.457	0.366	0.357
2.78528	0.457	0.366	0.357
2.79328	0.457	0.366	0.357
2.80128	0.457	0.366	0.357
2.80928	0.457	0.366	0.357
2.81728	0.457	0.366	0.357
2.82528	0.457	0.366	0.357
2.83328	0.457	0.366	0.357
2.84128	0.457	0.366	0.357
2.84928	0.457	0.366	0.357
2.85729	0.457	0.366	0.357
2.86529	0.457	0.366	0.357
2.87329	0.457	0.366	0.357
2.88129	0.457	0.366	0.357
2.88929	0.457	0.366	0.357
2.89729	0.457	0.366	0.357
2.90529	0.457	0.366	0.357
2.91329	0.457	0.366	0.357
2.92129	0.457	0.366	0.357
2.92929	0.457	0.366	0.357
2.93729	0.457	0.366	0.357
2.94529	0.457	0.366	0.357
2.9533	0.457	0.367	0.357
2.9613	0.457	0.367	0.357
2.9693	0.457	0.367	0.357
2.9773	0.457	0.367	0.357
2.9853	0.457	0.367	0.357
2.9933	0.457	0.367	0.357
3.0013	0.457	0.367	0.357
3.0093	0.457	0.367	0.357
3.0173	0.457	0.367	0.357
3.0253	0.457	0.367	0.357
3.0333	0.457	0.367	0.357
3.0413	0.457	0.367	0.357
3.0493	0.457	0.367	0.357
3.05731	0.457	0.367	0.357
3.06531	0.457	0.367	0.357
3.07331	0.457	0.367	0.357
3.08131	0.457	0.367	0.357
3.08931	0.457	0.367	0.357
3.09731	0.457	0.367	0.357
3.10531	0.457	0.367	0.357
3.11331	0.457	0.367	0.357
3.12131	0.457	0.367	0.357
3.12931	0.457	0.367	0.357
3.13731	0.457	0.367	0.357
3.14531	0.457	0.367	0.357
3.15332	0.457	0.367	0.357
3.16132	0.457	0.367	0.357
3.16932	0.457	0.367	0.357
3.17732	0.457	0.367	0.357
3.18532	0.457	0.368	0.357
3.19332	0.457	0.368	0.357
3.20132	0.457	0.368	0.357
3.20932	0.457	0.368	0.357
3.21732	0.457	0.368	0.357
3.22532	0.457	0.368	0.357
3.23332	0.457	0.368	0.357
3.24132	0.457	0.368	0.357
3.24932	0.457	0.368	0.357
3.25733	0.457	0.368	0.357
3.26533	0.457	0.368	0.357
3.27333	0.457	0.368	0.357
3.28133	0.457	0.368	0.357
3.28933	0.457	0.368	0.357
3.29733	0.457	0.368	0.357
3.30533	0.457	0.368	0.357
3.31333	0.457	0.368	0.357
3.32133	0.457	0.368	0.357
3.32933	0.457	0.368	0.357
3.33733	0.457	0.368	0.357
3.34533	0.457	0.368	0.357
3.35334	0.457	0.368	0.357
3.36134	0.457	0.368	0.357
3.36934	0.457	0.368	0.357
3.37734	0.457	0.368	0.357
3.38534	0.457	0.368	0.357
3.39334	0.457	0.368	0.357
3.40134	0.457	0.368	0.357
3.40934	0.457	0.368	0.357
3.41734	0.457	0.369	0.357
3.42534	0.457	0.369	0.358
3.43334	0.457	0.369	0.358
3.44134	0.458	0.369	0.358
3.44934	0.458	0.369	0.358
3.45735	0.458	0.369	0.358
3.46535	0.458	0.369	0.358
3.47335	0.458	0.369	0.358
3.48135	0.458	0.369	0.358
3.48935	0.458	0.369	0.358
3.49735	0.458	0.369	0.358
3.50535	0.458	0.369	0.358
3.51335	0.458	0.369	0.358
3.52135	0.458	0.369	0.358
3.52935	0.458	0.369	0.358
3.53735	0.458	0.369	0.358
3.54535	0.458	0.369	0.358
3.55336	0.458	0.369	0.358
3.56136	0.458	0.369	0.358
3.56936	0.458	0.369	0.358
3.57736	0.458	0.369	0.358
3.58536	0.458	0.369	0.358
3.59336	0.458	0.369	0.358
3.60136	0.458	0.369	0.358
3.60936	0.458	0.369	0.358
3.61736	0.458	0.369	0.358
3.62536	0.458	0.369	0.358
3.63336	0.458	0.369	0.358
3.64136	0.458	0.37	0.358
3.64936	0.458	0.37	0.358
3.65737	0.458	0.37	0.358
3.66537	0.458	0.37	0.358
3.67337	0.458	0.37	0.358
3.68137	0.458	0.37	0.358
3.68937	0.458	0.37	0.358
3.69737	0.458	0.37	0.358
3.70537	0.458	0.37	0.358
3.71337	0.458	0.37	0.358
3.72137	0.458	0.37	0.358
3.72937	0.458	0.37	0.358
3.73737	0.458	0.37	0.358
3.74537	0.458	0.37	0.358
3.75338	0.458	0.37	0.358
3.76138	0.458	0.37	0.358
3.76938	0.458	0.37	0.358
3.77738	0.458	0.37	0.358
3.78538	0.458	0.37	0.358
3.79338	0.458	0.37	0.358
3.80138	0.458	0.37	0.358
3.80938	0.458	0.37	0.358
3.81738	0.458	0.37	0.358
3.82538	0.458	0.37	0.358
3.83338	0.458	0.37	0.358
3.84138	0.458	0.37	0.358
3.84938	0.458	0.37	0.358
3.85739	0.458	0.37	0.358
3.86539	0.458	0.371	0.358
3.87339	0.458	0.371	0.358
3.88139	0.458	0.371	0.358
3.88939	0.458	0.371	0.358
3.89739	0.458	0.371	0.358
3.90539	0.458	0.371	0.358
3.91339	0.458	0.371	0.358
3.92139	0.458	0.371	0.358
3.92939	0.458	0.371	0.358
3.93739	0.458	0.371	0.358
3.94539	0.458	0.371	0.358
3.9534	0.458	0.371	0.358
3.9614	0.458	0.371	0.358
3.9694	0.458	0.371	0.358
3.9774	0.458	0.371	0.358
3.9854	0.458	0.371	0.358
3.9934	0.458	0.371	0.358
4.0014	0.458	0.371	0.358
4.0094	0.458	0.371	0.358
4.0174	0.458	0.371	0.358
4.0254	0.458	0.371	0.358
4.0334	0.458	0.371	0.358
4.0414	0.458	0.371	0.358
4.0494	0.458	0.371	0.358
4.05741	0.458	0.371	0.358
4.06541	0.458	0.371	0.358
4.07341	0.458	0.371	0.358
4.08141	0.458	0.371	0.358
4.08941	0.458	0.371	0.358
4.09741	0.458	0.372	0.358
4.10541	0.458	0.372	0.358
4.11341	0.458	0.372	0.358
4.12141	0.458	0.372	0.358
4.12941	0.458	0.372	0.358
4.13741	0.458	0.372	0.358
4.14541	0.458	0.372	0.358
4.15342	0.458	0.372	0.358
4.16142	0.458	0.372	0.358
4.16942	0.458	0.372	0.358
4.17742	0.458	0.372	0.358
4.18542	0.458	0.372	0.358
4.19342	0.458	0.372	0.358
4.20142	0.458	0.372	0.358
4.20942	0.459	0.372	0.358
4.21742	0.459	0.372	0.358
4.22542	0.459	0.372	0.359
4.23342	0.459	0.372	0.359
4.24142	0.459	0.372	0.359
4.24942	0.459	0.372	0.359
4.25743	0.459	0.372	0.359
4.26543	0.459	0.372	0.359
4.27343	0.459	0.372	0.359
4.28143	0.459	0.372	0.359
4.28943	0.459	0.372	0.359
4.29743	0.459	0.372	0.359
4.30543	0.459	0.372	0.359
4.31343	0.459	0.372	0.359
4.32143	0.459	0.373	0.359
4.32943	0.459	0.373	0.359
4.33743	0.459	0.373	0.359
4.34543	0.459	0.373	0.359
4.35344	0.459	0.373	0.359
4.36144	0.459	0.373	0.359
4.36944	0.459	0.373	0.359
4.37744	0.459	0.373	0.359
4.38544	0.459	0.373	0.359
4.39344	0.459	0.373	0.359
4.40144	0.459	0.373	0.359
4.40944	0.459	0.373	0.359
4.41744	0.459	0.373	0.359
4.42544	0.459	0.373	0.359
4.43344	0.459	0.373	0.359
4.44144	0.459	0.373	0.359
4.44944	0.459	0.373	0.359
4.45745	0.459	0.373	0.359
4.46545	0.459	0.373	0.359
4.47345	0.459	0.373	0.359
4.48145	0.459	0.373	0.359
4.48945	0.459	0.373	0.359
4.49745	0.459	0.373	0.359
4.50545	0.459	0.373	0.359
4.51345	0.459	0.373	0.359
4.52145	0.459	0.373	0.359
4.52945	0.459	0.373	0.359
4.53745	0.459	0.373	0.359
4.54545	0.459	0.374	0.359
4.55346	0.459	0.374	0.359
4.56146	0.459	0.374	0.359
4.56946	0.459	0.374	0.359
4.57746	0.459	0.374	0.359
4.58546	0.459	0.374	0.359
4.59346	0.459	0.374	0.359
4.60146	0.459	0.374	0.359
4.60946	0.459	0.374	0.359
4.61746	0.459	0.374	0.359
4.62546	0.459	0.374	0.359
4.63346	0.459	0.374	0.359
4.64146	0.459	0.374	0.359
4.64946	0.459	0.374	0.359
4.65747	0.459	0.374	0.359
4.66547	0.459	0.374	0.359
4.67347	0.459	0.374	0.359
4.68147	0.459	0.374	0.359
4.68947	0.459	0.374	0.359
4.69747	0.459	0.374	0.359
4.70547	0.459	0.374	0.359
4.71347	0.459	0.374	0.359
4.72147	0.459	0.374	0.359
4.72947	0.459	0.374	0.359
4.73747	0.459	0.374	0.359
4.74547	0.459	0.374	0.359
4.75348	0.459	0.374	0.359
4.76148	0.459	0.374	0.359
4.76948	0.459	0.375	0.359
4.77748	0.459	0.375	0.359
4.78548	0.459	0.375	0.359
4.79348	0.459	0.375	0.359
4.80148	0.459	0.375	0.359
4.80948	0.459	0.375	0.359
4.81748	0.459	0.375	0.359
4.82548	0.459	0.375	0.359
4.83348	0.459	0.375	0.359
4.84148	0.459	0.375	0.359
4.84948	0.459	0.375	0.359
4.85749	0.459	0.375	0.359
4.86549	0.459	0.375	0.359
4.87349	0.459	0.375	0.359
4.88149	0.459	0.375	0.359
4.88949	0.459	0.375	0.359
4.89749	0.459	0.375	0.359
4.90549	0.459	0.375	0.359
4.91349	0.459	0.375	0.359
4.92149	0.459	0.375	0.359
4.92949	0.459	0.375	0.359
4.93749	0.459	0.375	0.359
4.94549	0.459	0.375	0.359
4.9535	0.459	0.375	0.359
4.9615	0.459	0.375	0.359
4.9695	0.459	0.375	0.359
4.9775	0.459	0.375	0.359
4.9855	0.46	0.376	0.359
4.9935	0.46	0.376	0.359
5.0015	0.46	0.376	0.359
5.0095	0.46	0.376	0.359
5.0175	0.46	0.376	0.359
5.0255	0.46	0.376	0.359
5.0335	0.46	0.376	0.359
5.0415	0.46	0.376	0.36
5.0495	0.46	0.376	0.36
5.05751	0.46	0.376	0.36
5.06551	0.46	0.376	0.36
5.07351	0.46	0.376	0.36
5.08151	0.46	0.376	0.36
5.08951	0.46	0.376	0.36
5.09751	0.46	0.376	0.36
5.10551	0.46	0.376	0.36
5.11351	0.46	0.376	0.36
5.12151	0.46	0.376	0.36
5.12951	0.46	0.376	0.36
5.13751	0.46	0.376	0.36
5.14551	0.46	0.376	0.36
5.15352	0.46	0.376	0.36
5.16152	0.46	0.376	0.36
5.16952	0.46	0.376	0.36
5.17752	0.46	0.376	0.36
5.18552	0.46	0.376	0.36
5.19352	0.46	0.376	0.36
5.20152	0.46	0.376	0.36
5.20952	0.46	0.377	0.36
5.21752	0.46	0.377	0.36
5.22552	0.46	0.377	0.36
5.23352	0.46	0.377	0.36
5.24152	0.46	0.377	0.36
5.24952	0.46	0.377	0.36
5.25753	0.46	0.377	0.36
5.26553	0.46	0.377	0.36
5.27353	0.46	0.377	0.36
5.28153	0.46	0.377	0.36
5.28953	0.46	0.377	0.36
5.29753	0.46	0.377	0.36
5.30553	0.46	0.377	0.36
5.31353	0.46	0.377	0.36
5.32153	0.46	0.377	0.36
5.32953	0.46	0.377	0.36
5.33753	0.46	0.377	0.36
5.34553	0.46	0.377	0.36
5.35354	0.46	0.377	0.36
5.36154	0.46	0.377	0.36
5.36954	0.46	0.377	0.36
5.37754	0.46	0.377	0.36
5.38554	0.46	0.377	0.36
5.39354	0.46	0.377	0.36
5.40154	0.46	0.377	0.36
5.40954	0.46	0.377	0.36
5.41754	0.46	0.377	0.36
5.42554	0.46	0.377	0.36
5.43354	0.46	0.378	0.36
5.44154	0.46	0.378	0.36
5.44954	0.46	0.378	0.36
5.45755	0.46	0.378	0.36
5.46555	0.46	0.378	0.36
5.47355	0.46	0.378	0.36
5.48155	0.46	0.378	0.36
5.48955	0.46	0.378	0.36
5.49755	0.46	0.378	0.36
5.50555	0.46	0.378	0.36
5.51355	0.46	0.378	0.36
5.52155	0.46	0.378	0.36
5.52955	0.46	0.378	0.36
5.53755	0.46	0.378	0.36
5.54555	0.46	0.378	0.36
5.55356	0.46	0.378	0.36
5.56156	0.46	0.378	0.36
5.56956	0.46	0.378	0.36
5.57756	0.46	0.378	0.36
5.58556	0.46	0.378	0.36
5.59356	0.46	0.378	0.36
5.60156	0.46	0.378	0.36
5.60956	0.46	0.378	0.36
5.61756	0.46	0.378	0.36
5.62556	0.46	0.378	0.36
5.63356	0.46	0.378	0.36
5.64156	0.46	0.378	0.36
5.64956	0.46	0.378	0.36
5.65757	0.46	0.379	0.36
5.66557	0.46	0.379	0.36
5.67357	0.46	0.379	0.36
5.68157	0.46	0.379	0.36
5.68957	0.46	0.379	0.36
5.69757	0.46	0.379	0.36
5.70557	0.46	0.379	0.36
5.71357	0.46	0.379	0.36
5.72157	0.46	0.379	0.36
5.72957	0.46	0.379	0.36
5.73757	0.46	0.379	0.36
5.74557	0.46	0.379	0.36
5.75358	0.46	0.379	0.36
5.76158	0.46	0.379	0.36
5.76958	0.46	0.379	0.36
5.77758	0.46	0.379	0.36
5.78558	0.46	0.379	0.36
5.79358	0.46	0.379	0.36
5.80158	0.46	0.379	0.36
5.80958	0.46	0.379	0.36
5.81758	0.461	0.379	0.36
5.82558	0.461	0.379	0.36
5.83358	0.461	0.379	0.36
5.84158	0.461	0.379	0.36
5.84958	0.461	0.379	0.36
5.85759	0.461	0.379	0.36
5.86559	0.461	0.379	0.36
5.87359	0.461	0.38	0.36
5.88159	0.461	0.38	0.36
5.88959	0.461	0.38	0.36
5.89759	0.461	0.38	0.36
5.90559	0.461	0.38	0.36
5.91359	0.461	0.38	0.361
5.92159	0.461	0.38	0.361
5.92959	0.461	0.38	0.361
5.93759	0.461	0.38	0.361
5.94559	0.461	0.38	0.361
5.9536	0.461	0.38	0.361
5.9616	0.461	0.38	0.361
5.9696	0.461	0.38	0.361
5.9776	0.461	0.38	0.361
5.9856	0.461	0.38	0.361
[truncated: 8,001 more rows]

## Sheet: Figure6-S1B_exp. data
dorsal_x(EL)	dorsal_Bcd		ventral_x(EL)	ventral_Bcd
0.025	522.224		0.025	542.805
0.035	561.541		0.035	612.387
0.045	606.159		0.045	549.073
0.055	541.059		0.055	575.79
0.065	573.338		0.065	577.056
0.075	636.052		0.075	525.656
0.085	566.849		0.085	581.143
0.095	556.89		0.095	550.572
0.105	607.873		0.105	469.254
0.115	536.852		0.115	448.061
0.125	560.605		0.125	472.201
0.135	516.48		0.135	465.905
0.145	478.468		0.145	443.635
0.155	512.049		0.155	407.353
0.165	477.969		0.165	387.91
0.175	445.932		0.175	378.717
0.185	418.721		0.185	348.045
0.195	423.652		0.195	326.5
0.205	390.665		0.205	311.887
0.215	370.687		0.215	308.826
0.225	351.68		0.225	322.332
0.235	330.635		0.235	285.751
0.245	318.899		0.245	270.235
0.255	316.875		0.255	238.693
0.265	299.74		0.265	253.196
0.275	270.065		0.275	219.563
0.285	265.71		0.285	228.49
0.295	245.84		0.295	190.267
0.305	266.633		0.305	195.88
0.315	225.921		0.315	200.855
0.325	209.424		0.325	169.128
0.335	203.149		0.335	168.918
0.345	194.309		0.345	157.085
0.355	179.613		0.355	157.475
0.365	188.177		0.365	146.026
0.375	169.467		0.375	139.076
0.385	143.418		0.385	140.508
0.395	134.911		0.395	114.632
0.405	145.439		0.405	118.53
0.415	130.331		0.415	124.329
0.425	115.524		0.425	111.229
0.435	105.153		0.435	105.266
0.445	117.768		0.445	99.0352
0.455	100.218		0.455	101.621
0.465	87.571		0.465	90.0406
0.475	89.5218		0.475	85.4289
0.485	78.5066		0.485	76.9725
0.495	82.3293		0.495	83.1519
0.505	76.7159		0.505	73.0159
0.515	71.866		0.515	59.6172
0.525	70.966		0.525	76.4796
0.535	61.4832		0.535	60.8092
0.545	56.7718		0.545	61.5187
0.555	58.3998		0.555	56.4715
0.565	55.4046		0.565	55.5445
0.575	56.4633		0.575	50.4908
0.585	42.5902		0.585	46.4851
0.595	44.1138		0.595	43.7713
0.605	44.7247		0.605	44.8238
0.615	32.085		0.615	38.7603
0.625	36.1857		0.625	40.9066
0.635	31.8949		0.635	36.9012
0.645	23.8005		0.645	39.7532
0.655	29.2432		0.655	33.4366
0.675	28.8333		0.665	32.4591
0.685	22.5599		0.675	33.1376
0.695	27.2271		0.685	26.9133
0.705	25.7523		0.695	28.1194
0.715	22.7881		0.705	24.7456
0.725	23.1077		0.715	27.0163
0.735	21.7901		0.725	25.1136
0.745	19.8789		0.735	22.2242
0.755	15.6294		0.745	25.0033
0.765	18.5903		0.755	17.6304
0.775	15.4619		0.765	20.7997
0.785	15.3174		0.775	20.4416
0.795	15.9158		0.785	18.7743
0.805	14.9848		0.795	18.7985
0.815	15.9458		0.805	15.4985
0.825	16.5695		0.815	15.008
0.835	13.1567		0.825	14.4215
0.845	13.5624		0.835	16.3589
0.855	12.0573		0.845	16.5427
0.865	9.16679		0.855	13.2535
0.875	12.6037		0.865	12.4884
0.885	10.5161		0.875	13.1047
0.895	10.4823		0.885	12.0664
0.905	10.0587		0.895	11.5438
0.915	12.2149		0.905	9.06997
0.925	12.8733		0.915	11.731
0.935	13.0069		0.925	13.0449
0.945	10.0879		0.935	14.473
0.955	10.7924		0.945	10.1197
0.965	7.72338		0.955	12.8033
0.975	8.79423		0.965	11.6626
			0.975	10.6382

## Sheet: Figure6-S1C
time(min)	xhb_dorsal_WT(EL)	xhb_ventral_WT(EL)	xhb_dorsal_Stau-(EL)	xhb_ventral_Stau-(EL)
-10	0.3	0.3	0	0
-9.992	0.3	0.3	0.323	0.263
-9.984	0.3	0.3	0.323	0.263
-9.976	0.3	0.301	0.323	0.263
-9.968	0.3	0.301	0.323	0.263
-9.96	0.3	0.301	0.323	0.263
-9.952	0.3	0.301	0.323	0.263
-9.94399	0.3	0.301	0.323	0.263
-9.93599	0.301	0.301	0.323	0.263
-9.92799	0.301	0.301	0.323	0.263
-9.91999	0.301	0.301	0.323	0.263
-9.91199	0.301	0.301	0.323	0.263
-9.90399	0.301	0.301	0.323	0.263
-9.89599	0.301	0.302	0.323	0.263
-9.88799	0.301	0.302	0.323	0.263
-9.87999	0.301	0.302	0.323	0.263
-9.87199	0.301	0.302	0.323	0.263
-9.86399	0.301	0.302	0.323	0.263
-9.85599	0.301	0.302	0.323	0.263
-9.84798	0.301	0.302	0.323	0.263
-9.83998	0.301	0.302	0.323	0.263
-9.83198	0.301	0.302	0.323	0.263
-9.82398	0.301	0.303	0.323	0.264
-9.81598	0.301	0.303	0.323	0.264
-9.80798	0.301	0.303	0.323	0.264
-9.79998	0.301	0.303	0.323	0.264
-9.79198	0.301	0.303	0.323	0.264
-9.78398	0.301	0.303	0.323	0.264
-9.77598	0.301	0.303	0.324	0.264
-9.76798	0.301	0.303	0.324	0.264
-9.75998	0.301	0.303	0.324	0.264
-9.75198	0.301	0.304	0.324	0.264
-9.74397	0.301	0.304	0.324	0.264
-9.73597	0.301	0.304	0.324	0.264
-9.72797	0.301	0.304	0.324	0.264
-9.71997	0.301	0.304	0.324	0.264
-9.71197	0.301	0.304	0.324	0.264
-9.70397	0.301	0.304	0.324	0.264
-9.69597	0.301	0.304	0.324	0.264
-9.68797	0.301	0.305	0.324	0.264
-9.67997	0.302	0.305	0.324	0.264
-9.67197	0.302	0.305	0.324	0.264
-9.66397	0.302	0.305	0.324	0.264
-9.65597	0.302	0.305	0.324	0.264
-9.64796	0.302	0.305	0.324	0.264
-9.63996	0.302	0.305	0.324	0.264
-9.63196	0.302	0.306	0.324	0.264
-9.62396	0.302	0.306	0.324	0.264
-9.61596	0.302	0.306	0.324	0.264
-9.60796	0.302	0.306	0.324	0.264
-9.59996	0.302	0.306	0.324	0.264
-9.59196	0.302	0.306	0.324	0.264
-9.58396	0.302	0.306	0.324	0.264
-9.57596	0.302	0.307	0.324	0.264
-9.56796	0.302	0.307	0.324	0.264
-9.55996	0.302	0.307	0.324	0.264
-9.55196	0.302	0.307	0.324	0.264
-9.54395	0.302	0.307	0.324	0.264
-9.53595	0.302	0.307	0.324	0.264
-9.52795	0.302	0.307	0.324	0.264
-9.51995	0.302	0.308	0.324	0.264
-9.51195	0.302	0.308	0.324	0.264
-9.50395	0.302	0.308	0.324	0.264
-9.49595	0.302	0.308	0.324	0.264
-9.48795	0.302	0.308	0.324	0.264
-9.47995	0.302	0.308	0.324	0.264
-9.47195	0.302	0.309	0.324	0.264
-9.46395	0.302	0.309	0.324	0.264
-9.45595	0.303	0.309	0.324	0.264
-9.44794	0.303	0.309	0.324	0.264
-9.43994	0.303	0.309	0.324	0.264
-9.43194	0.303	0.309	0.324	0.264
-9.42394	0.303	0.31	0.324	0.264
-9.41594	0.303	0.31	0.324	0.264
-9.40794	0.303	0.31	0.324	0.264
-9.39994	0.303	0.31	0.324	0.264
-9.39194	0.303	0.31	0.324	0.265
-9.38394	0.303	0.311	0.324	0.265
-9.37594	0.303	0.311	0.324	0.265
-9.36794	0.303	0.311	0.324	0.265
-9.35994	0.303	0.311	0.324	0.265
-9.35194	0.303	0.311	0.324	0.265
-9.34393	0.303	0.312	0.324	0.265
-9.33593	0.303	0.312	0.324	0.265
-9.32793	0.303	0.312	0.324	0.265
-9.31993	0.303	0.312	0.324	0.265
-9.31193	0.303	0.312	0.324	0.265
-9.30393	0.303	0.313	0.325	0.265
-9.29593	0.303	0.313	0.325	0.265
-9.28793	0.303	0.313	0.325	0.265
-9.27993	0.303	0.313	0.325	0.265
-9.27193	0.303	0.314	0.325	0.265
-9.26393	0.303	0.314	0.325	0.265
-9.25593	0.304	0.314	0.325	0.265
-9.24792	0.304	0.314	0.325	0.265
-9.23992	0.304	0.315	0.325	0.265
-9.23192	0.304	0.315	0.325	0.265
-9.22392	0.304	0.315	0.325	0.265
-9.21592	0.304	0.315	0.325	0.265
-9.20792	0.304	0.316	0.325	0.265
-9.19992	0.304	0.316	0.325	0.265
-9.19192	0.304	0.316	0.325	0.265
-9.18392	0.304	0.316	0.325	0.265
-9.17592	0.304	0.317	0.325	0.265
-9.16792	0.304	0.317	0.325	0.265
-9.15992	0.304	0.317	0.325	0.265
-9.15192	0.304	0.318	0.325	0.265
-9.14391	0.304	0.318	0.325	0.265
-9.13591	0.304	0.318	0.325	0.265
-9.12791	0.304	0.319	0.325	0.265
-9.11991	0.304	0.319	0.325	0.265
-9.11191	0.304	0.319	0.325	0.265
-9.10391	0.304	0.32	0.325	0.265
-9.09591	0.304	0.32	0.325	0.265
-9.08791	0.304	0.321	0.325	0.265
-9.07991	0.305	0.321	0.325	0.265
-9.07191	0.305	0.321	0.325	0.265
-9.06391	0.305	0.322	0.325	0.265
-9.05591	0.305	0.322	0.325	0.265
-9.0479	0.305	0.323	0.325	0.265
-9.0399	0.305	0.323	0.325	0.265
-9.0319	0.305	0.324	0.325	0.265
-9.0239	0.305	0.324	0.325	0.265
-9.0159	0.305	0.325	0.325	0.265
-9.0079	0.305	0.326	0.325	0.265
-8.9999	0.305	0.326	0.325	0.265
-8.9919	0.305	0.327	0.325	0.265
-8.9839	0.305	0.328	0.325	0.265
-8.9759	0.305	0.328	0.325	0.266
-8.9679	0.305	0.329	0.325	0.266
-8.9599	0.305	0.33	0.325	0.266
-8.9519	0.305	0.331	0.325	0.266
-8.94389	0.305	0.333	0.325	0.266
-8.93589	0.305	0.334	0.325	0.266
-8.92789	0.305	0.336	0.325	0.266
-8.91989	0.305	0.339	0.325	0.266
-8.91189	0.306	0.366	0.325	0.266
-8.90389	0.306	0.368	0.325	0.266
-8.89589	0.306	0.37	0.325	0.266
-8.88789	0.306	0.372	0.325	0.266
-8.87989	0.306	0.373	0.325	0.266
-8.87189	0.306	0.374	0.325	0.266
-8.86389	0.306	0.375	0.325	0.266
-8.85589	0.306	0.376	0.325	0.266
-8.84788	0.306	0.377	0.326	0.266
-8.83988	0.306	0.377	0.326	0.266
-8.83188	0.306	0.378	0.326	0.266
-8.82388	0.306	0.379	0.326	0.266
-8.81588	0.306	0.379	0.326	0.266
-8.80788	0.306	0.38	0.326	0.266
-8.79988	0.306	0.38	0.326	0.266
-8.79188	0.306	0.381	0.326	0.266
-8.78388	0.306	0.381	0.326	0.266
-8.77588	0.306	0.382	0.326	0.266
-8.76788	0.307	0.382	0.326	0.266
-8.75988	0.307	0.383	0.326	0.266
-8.75188	0.307	0.383	0.326	0.266
-8.74387	0.307	0.384	0.326	0.266
-8.73587	0.307	0.384	0.326	0.266
-8.72787	0.307	0.384	0.326	0.266
-8.71987	0.307	0.385	0.326	0.266
-8.71187	0.307	0.385	0.326	0.266
-8.70387	0.307	0.385	0.326	0.266
-8.69587	0.433	0.386	0.326	0.266
-8.68787	0.433	0.386	0.326	0.266
-8.67987	0.433	0.386	0.326	0.266
-8.67187	0.433	0.387	0.326	0.266
-8.66387	0.433	0.387	0.326	0.266
-8.65587	0.433	0.387	0.326	0.266
-8.64786	0.434	0.387	0.326	0.266
-8.63986	0.434	0.388	0.326	0.266
-8.63186	0.434	0.388	0.326	0.266
-8.62386	0.434	0.388	0.326	0.266
-8.61586	0.434	0.388	0.326	0.266
-8.60786	0.434	0.389	0.326	0.266
-8.59986	0.434	0.389	0.326	0.266
-8.59186	0.434	0.389	0.326	0.266
-8.58386	0.434	0.389	0.326	0.267
-8.57586	0.435	0.39	0.326	0.267
-8.56786	0.435	0.39	0.326	0.267
-8.55986	0.435	0.39	0.326	0.267
-8.55186	0.435	0.39	0.326	0.267
-8.54385	0.435	0.39	0.326	0.267
-8.53585	0.435	0.391	0.326	0.267
-8.52785	0.435	0.391	0.326	0.267
-8.51985	0.435	0.391	0.326	0.267
-8.51185	0.435	0.391	0.326	0.267
-8.50385	0.435	0.391	0.326	0.267
-8.49585	0.435	0.392	0.326	0.267
-8.48785	0.436	0.392	0.326	0.267
-8.47985	0.436	0.392	0.326	0.267
-8.47185	0.436	0.392	0.326	0.267
-8.46385	0.436	0.392	0.326	0.267
-8.45585	0.436	0.392	0.326	0.267
-8.44784	0.436	0.393	0.326	0.267
-8.43984	0.436	0.393	0.326	0.267
-8.43184	0.436	0.393	0.326	0.267
-8.42384	0.436	0.393	0.327	0.267
-8.41584	0.436	0.393	0.327	0.267
-8.40784	0.436	0.393	0.327	0.267
-8.39984	0.436	0.394	0.327	0.267
-8.39184	0.436	0.394	0.327	0.267
-8.38384	0.437	0.394	0.327	0.267
-8.37584	0.437	0.394	0.327	0.267
-8.36784	0.437	0.394	0.327	0.267
-8.35984	0.437	0.394	0.327	0.267
-8.35184	0.437	0.394	0.327	0.267
-8.34383	0.437	0.395	0.327	0.267
-8.33583	0.437	0.395	0.327	0.267
-8.32783	0.437	0.395	0.327	0.267
-8.31983	0.437	0.395	0.327	0.267
-8.31183	0.437	0.395	0.327	0.267
-8.30383	0.437	0.395	0.327	0.267
-8.29583	0.437	0.395	0.327	0.267
-8.28783	0.437	0.395	0.327	0.267
-8.27983	0.437	0.396	0.327	0.267
-8.27183	0.437	0.396	0.327	0.267
-8.26383	0.437	0.396	0.327	0.267
-8.25583	0.438	0.396	0.327	0.267
-8.24782	0.438	0.396	0.327	0.267
-8.23982	0.438	0.396	0.327	0.267
-8.23182	0.438	0.396	0.327	0.267
-8.22382	0.438	0.396	0.327	0.267
-8.21582	0.438	0.396	0.327	0.267
-8.20782	0.438	0.397	0.327	0.267
-8.19982	0.438	0.397	0.327	0.268
-8.19182	0.438	0.397	0.327	0.268
-8.18382	0.438	0.397	0.327	0.268
-8.17582	0.438	0.397	0.327	0.268
-8.16782	0.438	0.397	0.327	0.268
-8.15982	0.438	0.397	0.327	0.268
-8.15182	0.438	0.397	0.327	0.268
-8.14381	0.438	0.397	0.327	0.268
-8.13581	0.438	0.397	0.327	0.268
-8.12781	0.438	0.398	0.327	0.268
-8.11981	0.438	0.398	0.327	0.268
-8.11181	0.438	0.398	0.327	0.268
-8.10381	0.439	0.398	0.327	0.268
-8.09581	0.439	0.398	0.327	0.268
-8.08781	0.439	0.398	0.327	0.268
-8.07981	0.439	0.398	0.327	0.268
-8.07181	0.439	0.398	0.327	0.268
-8.06381	0.439	0.398	0.327	0.268
-8.05581	0.439	0.398	0.327	0.268
-8.0478	0.439	0.398	0.327	0.268
-8.0398	0.439	0.399	0.327	0.268
-8.0318	0.439	0.399	0.327	0.268
-8.0238	0.439	0.399	0.327	0.268
-8.0158	0.439	0.399	0.328	0.268
-8.0078	0.439	0.399	0.328	0.268
-7.9998	0.439	0.399	0.328	0.268
-7.9918	0.439	0.399	0.328	0.268
-7.9838	0.439	0.399	0.328	0.268
-7.9758	0.439	0.399	0.328	0.268
-7.9678	0.439	0.399	0.328	0.268
-7.9598	0.439	0.399	0.328	0.268
-7.9518	0.439	0.399	0.328	0.268
-7.94379	0.439	0.399	0.328	0.268
-7.93579	0.439	0.4	0.328	0.268
-7.92779	0.439	0.4	0.328	0.268
-7.91979	0.439	0.4	0.328	0.268
-7.91179	0.44	0.4	0.328	0.268
-7.90379	0.44	0.4	0.328	0.268
-7.89579	0.44	0.4	0.328	0.268
-7.88779	0.44	0.4	0.328	0.268
-7.87979	0.44	0.4	0.328	0.268
-7.87179	0.44	0.4	0.328	0.268
-7.86379	0.44	0.4	0.328	0.268
-7.85579	0.44	0.4	0.328	0.268
-7.84778	0.44	0.4	0.328	0.268
-7.83978	0.44	0.4	0.328	0.269
-7.83178	0.44	0.4	0.328	0.269
-7.82378	0.44	0.401	0.328	0.269
-7.81578	0.44	0.401	0.328	0.269
-7.80778	0.44	0.401	0.328	0.269
-7.79978	0.44	0.401	0.328	0.269
-7.79178	0.44	0.401	0.328	0.269
-7.78378	0.44	0.401	0.328	0.269
-7.77578	0.44	0.401	0.328	0.269
-7.76778	0.44	0.401	0.328	0.269
-7.75978	0.44	0.401	0.328	0.269
-7.75178	0.44	0.401	0.328	0.269
-7.74377	0.44	0.401	0.328	0.269
-7.73577	0.44	0.401	0.328	0.269
-7.72777	0.44	0.401	0.328	0.269
-7.71977	0.44	0.401	0.328	0.269
-7.71177	0.44	0.401	0.328	0.269
-7.70377	0.44	0.401	0.328	0.269
-7.69577	0.44	0.402	0.328	0.269
-7.68777	0.441	0.402	0.328	0.269
-7.67977	0.441	0.402	0.328	0.269
-7.67177	0.441	0.402	0.328	0.269
-7.66377	0.441	0.402	0.328	0.269
-7.65577	0.441	0.402	0.328	0.269
-7.64776	0.441	0.402	0.328	0.269
-7.63976	0.441	0.402	0.328	0.269
-7.63176	0.441	0.402	0.328	0.269
-7.62376	0.441	0.402	0.329	0.269
-7.61576	0.441	0.402	0.329	0.269
-7.60776	0.441	0.402	0.329	0.269
-7.59976	0.441	0.402	0.329	0.269
-7.59176	0.441	0.402	0.329	0.269
-7.58376	0.441	0.402	0.329	0.269
-7.57576	0.441	0.402	0.329	0.269
-7.56776	0.441	0.402	0.329	0.269
-7.55976	0.441	0.402	0.329	0.269
-7.55176	0.441	0.402	0.329	0.269
-7.54375	0.441	0.403	0.329	0.269
-7.53575	0.441	0.403	0.329	0.269
-7.52775	0.441	0.403	0.329	0.269
-7.51975	0.441	0.403	0.329	0.269
-7.51175	0.441	0.403	0.329	0.269
-7.50375	0.441	0.403	0.329	0.269
-7.49575	0.441	0.403	0.329	0.269
-7.48775	0.441	0.403	0.329	0.27
-7.47975	0.441	0.403	0.329	0.27
-7.47175	0.441	0.403	0.329	0.27
-7.46375	0.441	0.403	0.329	0.27
-7.45575	0.441	0.403	0.329	0.27
-7.44774	0.441	0.403	0.329	0.27
-7.43974	0.441	0.403	0.329	0.27
-7.43174	0.441	0.403	0.329	0.27
-7.42374	0.441	0.403	0.329	0.27
-7.41574	0.441	0.403	0.329	0.27
-7.40774	0.441	0.403	0.329	0.27
-7.39974	0.442	0.403	0.329	0.27
-7.39174	0.442	0.403	0.329	0.27
-7.38374	0.442	0.403	0.329	0.27
-7.37574	0.442	0.403	0.329	0.27
-7.36774	0.442	0.404	0.329	0.27
-7.35974	0.442	0.404	0.329	0.27
-7.35174	0.442	0.404	0.329	0.27
-7.34373	0.442	0.404	0.329	0.27
-7.33573	0.442	0.404	0.329	0.27
-7.32773	0.442	0.404	0.329	0.27
-7.31973	0.442	0.404	0.329	0.27
-7.31173	0.442	0.404	0.329	0.27
-7.30373	0.442	0.404	0.329	0.27
-7.29573	0.442	0.404	0.329	0.27
-7.28773	0.442	0.404	0.329	0.27
-7.27973	0.442	0.404	0.329	0.27
-7.27173	0.442	0.404	0.329	0.27
-7.26373	0.442	0.404	0.329	0.27
-7.25573	0.442	0.404	0.329	0.27
-7.24772	0.442	0.404	0.329	0.27
-7.23972	0.442	0.404	0.33	0.27
-7.23172	0.442	0.404	0.33	0.27
-7.22372	0.442	0.404	0.33	0.27
-7.21572	0.442	0.404	0.33	0.27
-7.20772	0.442	0.404	0.33	0.27
-7.19972	0.442	0.404	0.33	0.27
-7.19172	0.442	0.404	0.33	0.27
-7.18372	0.442	0.404	0.33	0.27
-7.17572	0.442	0.405	0.33	0.27
-7.16772	0.442	0.405	0.33	0.27
-7.15972	0.442	0.405	0.33	0.27
-7.15172	0.442	0.405	0.33	0.27
-7.14371	0.442	0.405	0.33	0.271
-7.13571	0.442	0.405	0.33	0.271
-7.12771	0.442	0.405	0.33	0.271
-7.11971	0.442	0.405	0.33	0.271
-7.11171	0.442	0.405	0.33	0.271
-7.10371	0.442	0.405	0.33	0.271
-7.09571	0.442	0.405	0.33	0.271
-7.08771	0.442	0.405	0.33	0.271
-7.07971	0.442	0.405	0.33	0.271
-7.07171	0.442	0.405	0.33	0.271
-7.06371	0.442	0.405	0.33	0.271
-7.05571	0.442	0.405	0.33	0.271
-7.0477	0.442	0.405	0.33	0.271
-7.0397	0.443	0.405	0.33	0.271
-7.0317	0.443	0.405	0.33	0.271
-7.0237	0.443	0.405	0.33	0.271
-7.0157	0.443	0.405	0.33	0.271
-7.0077	0.443	0.405	0.33	0.271
-6.9997	0.443	0.405	0.33	0.271
-6.9917	0.443	0.405	0.33	0.271
-6.9837	0.443	0.405	0.33	0.271
-6.9757	0.443	0.405	0.33	0.271
-6.9677	0.443	0.405	0.33	0.271
-6.9597	0.443	0.405	0.33	0.271
-6.9517	0.443	0.405	0.33	0.271
-6.94369	0.443	0.406	0.33	0.271
-6.93569	0.443	0.406	0.33	0.271
-6.92769	0.443	0.406	0.33	0.271
-6.91969	0.443	0.406	0.33	0.271
-6.91169	0.443	0.406	0.33	0.271
-6.90369	0.443	0.406	0.33	0.271
-6.89569	0.443	0.406	0.33	0.271
-6.88769	0.443	0.406	0.33	0.271
-6.87969	0.443	0.406	0.33	0.271
-6.87169	0.443	0.406	0.331	0.271
-6.86369	0.443	0.406	0.331	0.271
-6.85569	0.443	0.406	0.331	0.271
-6.84768	0.443	0.406	0.331	0.271
-6.83968	0.443	0.406	0.331	0.271
-6.83168	0.443	0.406	0.331	0.271
-6.82368	0.443	0.406	0.331	0.271
-6.81568	0.443	0.406	0.331	0.272
-6.80768	0.443	0.406	0.331	0.272
-6.79968	0.443	0.406	0.331	0.272
-6.79168	0.443	0.406	0.331	0.272
-6.78368	0.443	0.406	0.331	0.272
-6.77568	0.443	0.406	0.331	0.272
-6.76768	0.443	0.406	0.331	0.272
-6.75968	0.443	0.406	0.331	0.272
-6.75168	0.443	0.406	0.331	0.272
-6.74367	0.443	0.406	0.331	0.272
-6.73567	0.443	0.406	0.331	0.272
-6.72767	0.443	0.406	0.331	0.272
-6.71967	0.443	0.406	0.331	0.272
-6.71167	0.443	0.406	0.331	0.272
-6.70367	0.443	0.406	0.331	0.272
-6.69567	0.443	0.406	0.331	0.272
-6.68767	0.443	0.406	0.331	0.272
-6.67967	0.443	0.407	0.331	0.272
-6.67167	0.443	0.407	0.331	0.272
-6.66367	0.443	0.407	0.331	0.272
-6.65567	0.443	0.407	0.331	0.272
-6.64766	0.443	0.407	0.331	0.272
-6.63966	0.443	0.407	0.331	0.272
-6.63166	0.443	0.407	0.331	0.272
-6.62366	0.443	0.407	0.331	0.272
-6.61566	0.443	0.407	0.331	0.272
-6.60766	0.443	0.407	0.331	0.272
-6.59966	0.444	0.407	0.331	0.272
-6.59166	0.444	0.407	0.331	0.272
-6.58366	0.444	0.407	0.331	0.272
-6.57566	0.444	0.407	0.331	0.272
-6.56766	0.444	0.407	0.331	0.272
-6.55966	0.444	0.407	0.331	0.272
-6.55166	0.444	0.407	0.331	0.272
-6.54365	0.444	0.407	0.331	0.272
-6.53565	0.444	0.407	0.331	0.272
-6.52765	0.444	0.407	0.331	0.272
-6.51965	0.444	0.407	0.332	0.272
-6.51165	0.444	0.407	0.332	0.272
-6.50365	0.444	0.407	0.332	0.272
-6.49565	0.444	0.407	0.332	0.272
-6.48765	0.444	0.407	0.332	0.273
-6.47965	0.444	0.407	0.332	0.273
-6.47165	0.444	0.407	0.332	0.273
-6.46365	0.444	0.407	0.332	0.273
-6.45565	0.444	0.407	0.332	0.273
-6.44764	0.444	0.407	0.332	0.273
-6.43964	0.444	0.407	0.332	0.273
-6.43164	0.444	0.407	0.332	0.273
-6.42364	0.444	0.407	0.332	0.273
-6.41564	0.444	0.407	0.332	0.273
-6.40764	0.444	0.407	0.332	0.273
-6.39964	0.444	0.407	0.332	0.273
-6.39164	0.444	0.407	0.332	0.273
-6.38364	0.444	0.408	0.332	0.273
-6.37564	0.444	0.408	0.332	0.273
-6.36764	0.444	0.408	0.332	0.273
-6.35964	0.444	0.408	0.332	0.273
-6.35164	0.444	0.408	0.332	0.273
-6.34363	0.444	0.408	0.332	0.273
-6.33563	0.444	0.408	0.332	0.273
-6.32763	0.444	0.408	0.332	0.273
-6.31963	0.444	0.408	0.332	0.273
-6.31163	0.444	0.408	0.332	0.273
-6.30363	0.444	0.408	0.332	0.273
-6.29563	0.444	0.408	0.332	0.273
-6.28763	0.444	0.408	0.332	0.273
-6.27963	0.444	0.408	0.332	0.273
-6.27163	0.444	0.408	0.332	0.273
-6.26363	0.444	0.408	0.332	0.273
-6.25563	0.444	0.408	0.332	0.273
-6.24762	0.444	0.408	0.332	0.273
-6.23962	0.444	0.408	0.332	0.273
-6.23162	0.444	0.408	0.332	0.273
-6.22362	0.444	0.408	0.332	0.273
-6.21562	0.444	0.408	0.332	0.273
-6.20762	0.444	0.408	0.332	0.273
-6.19962	0.444	0.408	0.332	0.273
-6.19162	0.444	0.408	0.332	0.273
-6.18362	0.444	0.408	0.332	0.273
-6.17562	0.444	0.408	0.333	0.274
-6.16762	0.444	0.408	0.333	0.274
-6.15962	0.444	0.408	0.333	0.274
-6.15162	0.444	0.408	0.333	0.274
-6.14361	0.444	0.408	0.333	0.274
-6.13561	0.444	0.408	0.333	0.274
-6.12761	0.444	0.408	0.333	0.274
-6.11961	0.444	0.408	0.333	0.274
-6.11161	0.444	0.408	0.333	0.274
-6.10361	0.444	0.408	0.333	0.274
-6.09561	0.444	0.408	0.333	0.274
-6.08761	0.444	0.408	0.333	0.274
-6.07961	0.444	0.408	0.333	0.274
-6.07161	0.445	0.408	0.333	0.274
-6.06361	0.445	0.408	0.333	0.274
-6.05561	0.445	0.408	0.333	0.274
-6.0476	0.445	0.408	0.333	0.274
-6.0396	0.445	0.409	0.333	0.274
-6.0316	0.445	0.409	0.333	0.274
-6.0236	0.445	0.409	0.333	0.274
-6.0156	0.445	0.409	0.333	0.274
-6.0076	0.445	0.409	0.333	0.274
-5.9996	0.445	0.409	0.333	0.274
-5.9916	0.445	0.409	0.333	0.274
-5.9836	0.445	0.409	0.333	0.274
-5.9756	0.445	0.409	0.333	0.274
-5.9676	0.445	0.409	0.333	0.274
-5.9596	0.445	0.409	0.333	0.274
-5.9516	0.445	0.409	0.333	0.274
-5.94359	0.445	0.409	0.333	0.274
-5.93559	0.445	0.409	0.333	0.274
-5.92759	0.445	0.409	0.333	0.274
-5.91959	0.445	0.409	0.333	0.274
-5.91159	0.445	0.409	0.333	0.274
-5.90359	0.445	0.409	0.333	0.274
-5.89559	0.445	0.409	0.333	0.274
-5.88759	0.445	0.409	0.333	0.274
-5.87959	0.445	0.409	0.333	0.274
-5.87159	0.445	0.409	0.333	0.274
-5.86359	0.445	0.409	0.333	0.275
-5.85559	0.445	0.409	0.333	0.275
-5.84758	0.445	0.409	0.333	0.275
-5.83958	0.445	0.409	0.333	0.275
-5.83158	0.445	0.409	0.334	0.275
-5.82358	0.445	0.409	0.334	0.275
-5.81558	0.445	0.409	0.334	0.275
-5.80758	0.445	0.409	0.334	0.275
-5.79958	0.445	0.409	0.334	0.275
-5.79158	0.445	0.409	0.334	0.275
-5.78358	0.445	0.409	0.334	0.275
-5.77558	0.445	0.409	0.334	0.275
-5.76758	0.445	0.409	0.334	0.275
-5.75958	0.445	0.409	0.334	0.275
-5.75158	0.445	0.409	0.334	0.275
-5.74357	0.445	0.409	0.334	0.275
-5.73557	0.445	0.409	0.334	0.275
-5.72757	0.445	0.409	0.334	0.275
-5.71957	0.445	0.409	0.334	0.275
-5.71157	0.445	0.409	0.334	0.275
-5.70357	0.445	0.409	0.334	0.275
-5.69557	0.445	0.409	0.334	0.275
-5.68757	0.445	0.409	0.334	0.275
-5.67957	0.445	0.409	0.334	0.275
-5.67157	0.445	0.409	0.334	0.275
-5.66357	0.445	0.409	0.334	0.275
-5.65557	0.445	0.409	0.334	0.275
-5.64756	0.445	0.41	0.334	0.275
-5.63956	0.445	0.41	0.334	0.275
-5.63156	0.445	0.41	0.334	0.275
-5.62356	0.445	0.41	0.334	0.275
-5.61556	0.445	0.41	0.334	0.275
-5.60756	0.445	0.41	0.334	0.275
-5.59956	0.445	0.41	0.334	0.275
-5.59156	0.445	0.41	0.334	0.275
-5.58356	0.445	0.41	0.334	0.275
-5.57556	0.445	0.41	0.334	0.275
-5.56756	0.445	0.41	0.334	0.276
-5.55956	0.445	0.41	0.334	0.276
-5.55156	0.445	0.41	0.334	0.276
-5.54355	0.445	0.41	0.334	0.276
-5.53555	0.445	0.41	0.334	0.276
-5.52755	0.445	0.41	0.334	0.276
-5.51955	0.445	0.41	0.334	0.276
-5.51155	0.445	0.41	0.334	0.276
-5.50355	0.445	0.41	0.335	0.276
-5.49555	0.445	0.41	0.335	0.276
-5.48755	0.445	0.41	0.335	0.276
-5.47955	0.445	0.41	0.335	0.276
-5.47155	0.445	0.41	0.335	0.276
-5.46355	0.445	0.41	0.335	0.276
-5.45555	0.446	0.41	0.335	0.276
-5.44754	0.446	0.41	0.335	0.276
-5.43954	0.446	0.41	0.335	0.276
-5.43154	0.446	0.41	0.335	0.276
-5.42354	0.446	0.41	0.335	0.276
-5.41554	0.446	0.41	0.335	0.276
-5.40754	0.446	0.41	0.335	0.276
-5.39954	0.446	0.41	0.335	0.276
-5.39154	0.446	0.41	0.335	0.276
-5.38354	0.446	0.41	0.335	0.276
-5.37554	0.446	0.41	0.335	0.276
-5.36754	0.446	0.41	0.335	0.276
-5.35954	0.446	0.41	0.335	0.276
-5.35154	0.446	0.41	0.335	0.276
-5.34353	0.446	0.41	0.335	0.276
-5.33553	0.446	0.41	0.335	0.276
-5.32753	0.446	0.41	0.335	0.276
-5.31953	0.446	0.41	0.335	0.276
-5.31153	0.446	0.41	0.335	0.276
-5.30353	0.446	0.41	0.335	0.276
-5.29553	0.446	0.41	0.335	0.276
-5.28753	0.446	0.41	0.335	0.276
-5.27953	0.446	0.41	0.335	0.276
-5.27153	0.446	0.41	0.335	0.277
-5.26353	0.446	0.41	0.335	0.277
-5.25553	0.446	0.41	0.335	0.277
-5.24752	0.446	0.41	0.335	0.277
-5.23952	0.446	0.41	0.335	0.277
-5.23152	0.446	0.41	0.335	0.277
-5.22352	0.446	0.41	0.335	0.277
-5.21552	0.446	0.411	0.335	0.277
-5.20752	0.446	0.411	0.335	0.277
-5.19952	0.446	0.411	0.335	0.277
-5.19152	0.446	0.411	0.335	0.277
-5.18352	0.446	0.411	0.336	0.277
-5.17552	0.446	0.411	0.336	0.277
-5.16752	0.446	0.411	0.336	0.277
-5.15952	0.446	0.411	0.336	0.277
-5.15152	0.446	0.411	0.336	0.277
-5.14351	0.446	0.411	0.336	0.277
-5.13551	0.446	0.411	0.336	0.277
-5.12751	0.446	0.411	0.336	0.277
-5.11951	0.446	0.411	0.336	0.277
-5.11151	0.446	0.411	0.336	0.277
-5.10351	0.446	0.411	0.336	0.277
-5.09551	0.446	0.411	0.336	0.277
-5.08751	0.446	0.411	0.336	0.277
-5.07951	0.446	0.411	0.336	0.277
-5.07151	0.446	0.411	0.336	0.277
-5.06351	0.446	0.411	0.336	0.277
-5.05551	0.446	0.411	0.336	0.277
-5.0475	0.446	0.411	0.336	0.277
-5.0395	0.446	0.411	0.336	0.277
-5.0315	0.446	0.411	0.336	0.277
-5.0235	0.446	0.411	0.336	0.277
-5.0155	0.446	0.411	0.336	0.277
-5.0075	0.446	0.411	0.336	0.277
-4.9995	0.446	0.411	0.336	0.277
-4.9915	0.446	0.411	0.336	0.277
-4.9835	0.446	0.411	0.336	0.278
-4.9755	0.446	0.411	0.336	0.278
-4.9675	0.446	0.411	0.336	0.278
-4.9595	0.446	0.411	0.336	0.278
-4.9515	0.446	0.411	0.336	0.278
-4.94349	0.446	0.411	0.336	0.278
-4.93549	0.446	0.411	0.336	0.278
-4.92749	0.446	0.411	0.336	0.278
-4.91949	0.446	0.411	0.336	0.278
-4.91149	0.446	0.411	0.336	0.278
-4.90349	0.446	0.411	0.336	0.278
-4.89549	0.446	0.411	0.336	0.278
-4.88749	0.446	0.411	0.336	0.278
-4.87949	0.446	0.411	0.336	0.278
-4.87149	0.446	0.411	0.336	0.278
-4.86349	0.446	0.411	0.337	0.278
-4.85549	0.446	0.411	0.337	0.278
-4.84748	0.446	0.411	0.337	0.278
-4.83948	0.446	0.411	0.337	0.278
-4.83148	0.446	0.411	0.337	0.278
-4.82348	0.446	0.411	0.337	0.278
-4.81548	0.446	0.411	0.337	0.278
-4.80748	0.446	0.411	0.337	0.278
-4.79948	0.446	0.411	0.337	0.278
-4.79148	0.446	0.411	0.337	0.278
-4.78348	0.446	0.411	0.337	0.278
-4.77548	0.447	0.411	0.337	0.278
-4.76748	0.447	0.411	0.337	0.278
-4.75948	0.447	0.411	0.337	0.278
-4.75148	0.447	0.411	0.337	0.278
-4.74347	0.447	0.412	0.337	0.278
-4.73547	0.447	0.412	0.337	0.278
-4.72747	0.447	0.412	0.337	0.278
-4.71947	0.447	0.412	0.337	0.278
-4.71147	0.447	0.412	0.337	0.278
-4.70347	0.447	0.412	0.337	0.278
-4.69547	0.447	0.412	0.337	0.279
-4.68747	0.447	0.412	0.337	0.279
-4.67947	0.447	0.412	0.337	0.279
-4.67147	0.447	0.412	0.337	0.279
-4.66347	0.447	0.412	0.337	0.279
-4.65547	0.447	0.412	0.337	0.279
-4.64746	0.447	0.412	0.337	0.279
-4.63946	0.447	0.412	0.337	0.279
-4.63146	0.447	0.412	0.337	0.279
-4.62346	0.447	0.412	0.337	0.279
-4.61546	0.447	0.412	0.337	0.279
-4.60746	0.447	0.412	0.337	0.279
-4.59946	0.447	0.412	0.337	0.279
-4.59146	0.447	0.412	0.337	0.279
-4.58346	0.447	0.412	0.337	0.279
-4.57546	0.447	0.412	0.337	0.279
-4.56746	0.447	0.412	0.337	0.279
-4.55946	0.447	0.412	0.337	0.279
-4.55146	0.447	0.412	0.338	0.279
-4.54345	0.447	0.412	0.338	0.279
-4.53545	0.447	0.412	0.338	0.279
-4.52745	0.447	0.412	0.338	0.279
-4.51945	0.447	0.412	0.338	0.279
-4.51145	0.447	0.412	0.338	0.279
-4.50345	0.447	0.412	0.338	0.279
-4.49545	0.447	0.412	0.338	0.279
-4.48745	0.447	0.412	0.338	0.279
-4.47945	0.447	0.412	0.338	0.279
-4.47145	0.447	0.412	0.338	0.279
-4.46345	0.447	0.412	0.338	0.279
-4.45545	0.447	0.412	0.338	0.279
-4.44744	0.447	0.412	0.338	0.279
-4.43944	0.447	0.412	0.338	0.279
-4.43144	0.447	0.412	0.338	0.279
-4.42344	0.447	0.412	0.338	0.279
-4.41544	0.447	0.412	0.338	0.28
-4.40744	0.447	0.412	0.338	0.28
-4.39944	0.447	0.412	0.338	0.28
-4.39144	0.447	0.412	0.338	0.28
-4.38344	0.447	0.412	0.338	0.28
-4.37544	0.447	0.412	0.338	0.28
-4.36744	0.447	0.412	0.338	0.28
-4.35944	0.447	0.412	0.338	0.28
-4.35144	0.447	0.412	0.338	0.28
-4.34343	0.447	0.412	0.338	0.28
-4.33543	0.447	0.412	0.338	0.28
-4.32743	0.447	0.412	0.338	0.28
-4.31943	0.447	0.412	0.338	0.28
-4.31143	0.447	0.412	0.338	0.28
-4.30343	0.447	0.412	0.338	0.28
-4.29543	0.447	0.412	0.338	0.28
-4.28743	0.447	0.412	0.338	0.28
-4.27943	0.447	0.412	0.338	0.28
-4.27143	0.447	0.412	0.338	0.28
-4.26343	0.447	0.412	0.338	0.28
-4.25543	0.447	0.412	0.338	0.28
-4.24742	0.447	0.412	0.339	0.28
-4.23942	0.447	0.412	0.339	0.28
-4.23142	0.447	0.413	0.339	0.28
-4.22342	0.447	0.413	0.339	0.28
-4.21542	0.447	0.413	0.339	0.28
-4.20742	0.447	0.413	0.339	0.28
-4.19942	0.447	0.413	0.339	0.28
-4.19142	0.447	0.413	0.339	0.28
-4.18342	0.447	0.413	0.339	0.28
-4.17542	0.447	0.413	0.339	0.28
-4.16742	0.447	0.413	0.339	0.28
-4.15942	0.447	0.413	0.339	0.28
-4.15142	0.447	0.413	0.339	0.28
-4.14341	0.447	0.413	0.339	0.281
-4.13541	0.447	0.413	0.339	0.281
-4.12741	0.447	0.413	0.339	0.281
-4.11941	0.447	0.413	0.339	0.281
-4.11141	0.447	0.413	0.339	0.281
-4.10341	0.447	0.413	0.339	0.281
-4.09541	0.447	0.413	0.339	0.281
-4.08741	0.447	0.413	0.339	0.281
-4.07941	0.447	0.413	0.339	0.281
-4.07141	0.447	0.413	0.339	0.281
-4.06341	0.447	0.413	0.339	0.281
-4.05541	0.448	0.413	0.339	0.281
-4.0474	0.448	0.413	0.339	0.281
-4.0394	0.448	0.413	0.339	0.281
-4.0314	0.448	0.413	0.339	0.281
-4.0234	0.448	0.413	0.339	0.281
-4.0154	0.448	0.413	0.339	0.281
-4.0074	0.448	0.413	0.339	0.281
-3.9994	0.448	0.413	0.339	0.281
-3.9914	0.448	0.413	0.339	0.281
-3.9834	0.448	0.413	0.339	0.281
-3.9754	0.448	0.413	0.339	0.281
-3.9674	0.448	0.413	0.339	0.281
-3.9594	0.448	0.413	0.339	0.281
-3.9514	0.448	0.413	0.34	0.281
-3.94339	0.448	0.413	0.34	0.281
-3.93539	0.448	0.413	0.34	0.281
-3.92739	0.448	0.413	0.34	0.281
-3.91939	0.448	0.413	0.34	0.281
-3.91139	0.448	0.413	0.34	0.281
-3.90339	0.448	0.413	0.34	0.281
-3.89539	0.448	0.413	0.34	0.281
-3.88739	0.448	0.413	0.34	0.281
-3.87939	0.448	0.413	0.34	0.281
-3.87139	0.448	0.413	0.34	0.282
-3.86339	0.448	0.413	0.34	0.282
-3.85539	0.448	0.413	0.34	0.282
-3.84738	0.448	0.413	0.34	0.282
-3.83938	0.448	0.413	0.34	0.282
-3.83138	0.448	0.413	0.34	0.282
-3.82338	0.448	0.413	0.34	0.282
-3.81538	0.448	0.413	0.34	0.282
-3.80738	0.448	0.413	0.34	0.282
-3.79938	0.448	0.413	0.34	0.282
-3.79138	0.448	0.413	0.34	0.282
-3.78338	0.448	0.413	0.34	0.282
-3.77538	0.448	0.413	0.34	0.282
-3.76738	0.448	0.413	0.34	0.282
-3.75938	0.448	0.413	0.34	0.282
-3.75138	0.448	0.413	0.34	0.282
-3.74337	0.448	0.413	0.34	0.282
-3.73537	0.448	0.413	0.34	0.282
-3.72737	0.448	0.413	0.34	0.282
-3.71937	0.448	0.413	0.34	0.282
-3.71137	0.448	0.413	0.34	0.282
-3.70337	0.448	0.413	0.34	0.282
-3.69537	0.448	0.413	0.34	0.282
-3.68737	0.448	0.414	0.34	0.282
-3.67937	0.448	0.414	0.34	0.282
-3.67137	0.448	0.414	0.34	0.282
-3.66337	0.448	0.414	0.34	0.282
-3.65537	0.448	0.414	0.341	0.282
-3.64736	0.448	0.414	0.341	0.282
-3.63936	0.448	0.414	0.341	0.282
-3.63136	0.448	0.414	0.341	0.282
-3.62336	0.448	0.414	0.341	0.282
-3.61536	0.448	0.414	0.341	0.282
-3.60736	0.448	0.414	0.341	0.283
-3.59936	0.448	0.414	0.341	0.283
-3.59136	0.448	0.414	0.341	0.283
-3.58336	0.448	0.414	0.341	0.283
-3.57536	0.448	0.414	0.341	0.283
-3.56736	0.448	0.414	0.341	0.283
-3.55936	0.448	0.414	0.341	0.283
-3.55136	0.448	0.414	0.341	0.283
-3.54335	0.448	0.414	0.341	0.283
-3.53535	0.448	0.414	0.341	0.283
-3.52735	0.448	0.414	0.341	0.283
-3.51935	0.448	0.414	0.341	0.283
-3.51135	0.448	0.414	0.341	0.283
-3.50335	0.448	0.414	0.341	0.283
-3.49535	0.448	0.414	0.341	0.283
-3.48735	0.448	0.414	0.341	0.283
-3.47935	0.448	0.414	0.341	0.283
-3.47135	0.448	0.414	0.341	0.283
-3.46335	0.448	0.414	0.341	0.283
-3.45535	0.448	0.414	0.341	0.283
-3.44734	0.448	0.414	0.341	0.283
-3.43934	0.448	0.414	0.341	0.283
-3.43134	0.448	0.414	0.341	0.283
-3.42334	0.448	0.414	0.341	0.283
-3.41534	0.448	0.414	0.341	0.283
-3.40734	0.448	0.414	0.341	0.283
-3.39934	0.448	0.414	0.341	0.283
-3.39134	0.448	0.414	0.341	0.283
-3.38334	0.448	0.414	0.341	0.283
-3.37534	0.448	0.414	0.341	0.283
-3.36734	0.448	0.414	0.342	0.283
-3.35934	0.448	0.414	0.342	0.283
-3.35134	0.448	0.414	0.342	0.283
-3.34333	0.448	0.414	0.342	0.284
-3.33533	0.448	0.414	0.342	0.284
-3.32733	0.448	0.414	0.342	0.284
-3.31933	0.448	0.414	0.342	0.284
-3.31133	0.449	0.414	0.342	0.284
-3.30333	0.449	0.414	0.342	0.284
-3.29533	0.449	0.414	0.342	0.284
-3.28733	0.449	0.414	0.342	0.284
-3.27933	0.449	0.414	0.342	0.284
-3.27133	0.449	0.414	0.342	0.284
-3.26333	0.449	0.414	0.342	0.284
-3.25533	0.449	0.414	0.342	0.284
-3.24732	0.449	0.414	0.342	0.284
-3.23932	0.449	0.414	0.342	0.284
-3.23132	0.449	0.414	0.342	0.284
-3.22332	0.449	0.414	0.342	0.284
-3.21532	0.449	0.414	0.342	0.284
-3.20732	0.449	0.414	0.342	0.284
-3.19932	0.449	0.414	0.342	0.284
-3.19132	0.449	0.414	0.342	0.284
-3.18332	0.449	0.414	0.342	0.284
-3.17532	0.449	0.414	0.342	0.284
-3.16732	0.449	0.414	0.342	0.284
-3.15932	0.449	0.414	0.342	0.284
-3.15132	0.449	0.414	0.342	0.284
-3.14331	0.449	0.414	0.342	0.284
-3.13531	0.449	0.414	0.342	0.284
-3.12731	0.449	0.414	0.342	0.284
-3.11931	0.449	0.415	0.342	0.284
-3.11131	0.449	0.415	0.342	0.284
-3.10331	0.449	0.415	0.342	0.284
-3.09531	0.449	0.415	0.342	0.284
-3.08731	0.449	0.415	0.342	0.284
-3.07931	0.449	0.415	0.343	0.285
-3.07131	0.449	0.415	0.343	0.285
-3.06331	0.449	0.415	0.343	0.285
-3.05531	0.449	0.415	0.343	0.285
-3.0473	0.449	0.415	0.343	0.285
-3.0393	0.449	0.415	0.343	0.285
-3.0313	0.449	0.415	0.343	0.285
-3.0233	0.449	0.415	0.343	0.285
-3.0153	0.449	0.415	0.343	0.285
-3.0073	0.449	0.415	0.343	0.285
-2.9993	0.449	0.415	0.343	0.285
-2.9913	0.449	0.415	0.343	0.285
-2.9833	0.449	0.415	0.343	0.285
-2.9753	0.449	0.415	0.343	0.285
-2.9673	0.449	0.415	0.343	0.285
-2.9593	0.449	0.415	0.343	0.285
-2.9513	0.449	0.415	0.343	0.285
-2.94329	0.449	0.415	0.343	0.285
-2.93529	0.449	0.415	0.343	0.285
-2.92729	0.449	0.415	0.343	0.285
-2.91929	0.449	0.415	0.343	0.285
-2.91129	0.449	0.415	0.343	0.285
-2.90329	0.449	0.415	0.343	0.285
-2.89529	0.449	0.415	0.343	0.285
-2.88729	0.449	0.415	0.343	0.285
-2.87929	0.449	0.415	0.343	0.285
-2.87129	0.449	0.415	0.343	0.285
-2.86329	0.449	0.415	0.343	0.285
-2.85529	0.449	0.415	0.343	0.285
-2.84728	0.449	0.415	0.343	0.285
-2.83928	0.449	0.415	0.343	0.285
-2.83128	0.449	0.415	0.343	0.285
-2.82328	0.449	0.415	0.343	0.286
-2.81528	0.449	0.415	0.343	0.286
-2.80728	0.449	0.415	0.343	0.286
-2.79928	0.449	0.415	0.344	0.286
-2.79128	0.449	0.415	0.344	0.286
-2.78328	0.449	0.415	0.344	0.286
-2.77528	0.449	0.415	0.344	0.286
-2.76728	0.449	0.415	0.344	0.286
-2.75928	0.449	0.415	0.344	0.286
-2.75128	0.449	0.415	0.344	0.286
-2.74327	0.449	0.415	0.344	0.286
-2.73527	0.449	0.415	0.344	0.286
-2.72727	0.449	0.415	0.344	0.286
-2.71927	0.449	0.415	0.344	0.286
-2.71127	0.449	0.415	0.344	0.286
-2.70327	0.449	0.415	0.344	0.286
-2.69527	0.449	0.415	0.344	0.286
-2.68727	0.449	0.415	0.344	0.286
-2.67927	0.449	0.415	0.344	0.286
-2.67127	0.449	0.415	0.344	0.286
-2.66327	0.449	0.415	0.344	0.286
-2.65527	0.449	0.415	0.344	0.286
-2.64726	0.449	0.415	0.344	0.286
-2.63926	0.449	0.415	0.344	0.286
-2.63126	0.449	0.415	0.344	0.286
-2.62326	0.449	0.415	0.344	0.286
-2.61526	0.449	0.415	0.344	0.286
-2.60726	0.449	0.415	0.344	0.286
-2.59926	0.449	0.415	0.344	0.286
-2.59126	0.449	0.415	0.344	0.286
-2.58326	0.449	0.415	0.344	0.286
-2.57526	0.449	0.415	0.344	0.287
-2.56726	0.449	0.415	0.344	0.287
-2.55926	0.45	0.415	0.344	0.287
-2.55126	0.45	0.415	0.344	0.287
-2.54325	0.45	0.415	0.344	0.287
-2.53525	0.45	0.416	0.344	0.287
-2.52725	0.45	0.416	0.345	0.287
-2.51925	0.45	0.416	0.345	0.287
-2.51125	0.45	0.416	0.345	0.287
-2.50325	0.45	0.416	0.345	0.287
-2.49525	0.45	0.416	0.345	0.287
-2.48725	0.45	0.416	0.345	0.287
-2.47925	0.45	0.416	0.345	0.287
-2.47125	0.45	0.416	0.345	0.287
-2.46325	0.45	0.416	0.345	0.287
-2.45525	0.45	0.416	0.345	0.287
-2.44724	0.45	0.416	0.345	0.287
-2.43924	0.45	0.416	0.345	0.287
-2.43124	0.45	0.416	0.345	0.287
-2.42324	0.45	0.416	0.345	0.287
-2.41524	0.45	0.416	0.345	0.287
-2.40724	0.45	0.416	0.345	0.287
-2.39924	0.45	0.416	0.345	0.287
-2.39124	0.45	0.416	0.345	0.287
-2.38324	0.45	0.416	0.345	0.287
-2.37524	0.45	0.416	0.345	0.287
-2.36724	0.45	0.416	0.345	0.287
-2.35924	0.45	0.416	0.345	0.287
-2.35124	0.45	0.416	0.345	0.287
-2.34323	0.45	0.416	0.345	0.287
-2.33523	0.45	0.416	0.345	0.287
-2.32723	0.45	0.416	0.345	0.287
-2.31923	0.45	0.416	0.345	0.288
-2.31123	0.45	0.416	0.345	0.288
-2.30323	0.45	0.416	0.345	0.288
-2.29523	0.45	0.416	0.345	0.288
-2.28723	0.45	0.416	0.345	0.288
-2.27923	0.45	0.416	0.345	0.288
-2.27123	0.45	0.416	0.345	0.288
-2.26323	0.45	0.416	0.345	0.288
-2.25523	0.45	0.416	0.345	0.288
-2.24722	0.45	0.416	0.346	0.288
-2.23922	0.45	0.416	0.346	0.288
-2.23122	0.45	0.416	0.346	0.288
-2.22322	0.45	0.416	0.346	0.288
-2.21522	0.45	0.416	0.346	0.288
-2.20722	0.45	0.416	0.346	0.288
-2.19922	0.45	0.416	0.346	0.288
-2.19122	0.45	0.416	0.346	0.288
-2.18322	0.45	0.416	0.346	0.288
-2.17522	0.45	0.416	0.346	0.288
-2.16722	0.45	0.416	0.346	0.288
-2.15922	0.45	0.416	0.346	0.288
-2.15122	0.45	0.416	0.346	0.288
-2.14321	0.45	0.416	0.346	0.288
-2.13521	0.45	0.416	0.346	0.288
-2.12721	0.45	0.416	0.346	0.288
-2.11921	0.45	0.416	0.346	0.288
-2.11121	0.45	0.416	0.346	0.288
-2.10321	0.45	0.416	0.346	0.288
-2.09521	0.45	0.416	0.346	0.288
-2.08721	0.45	0.416	0.346	0.288
-2.07921	0.45	0.416	0.346	0.288
-2.07121	0.45	0.416	0.346	0.289
-2.06321	0.45	0.416	0.346	0.289
-2.05521	0.45	0.416	0.346	0.289
-2.0472	0.45	0.416	0.346	0.289
-2.0392	0.45	0.416	0.346	0.289
-2.0312	0.45	0.416	0.346	0.289
-2.0232	0.45	0.416	0.346	0.289
-2.0152	0.45	0.416	0.346	0.289
-2.0072	0.45	0.416	0.346	0.289
-1.9992	0.45	0.416	0.346	0.289
-1.9912	0.45	0.416	0.346	0.289
-1.9832	0.45	0.416	0.346	0.289
-1.9752	0.45	0.416	0.347	0.289
-1.9672	0.45	0.416	0.347	0.289
-1.9592	0.45	0.416	0.347	0.289
-1.9512	0.45	0.416	0.347	0.289
-1.94319	0.45	0.416	0.347	0.289
-1.93519	0.45	0.417	0.347	0.289
-1.92719	0.45	0.417	0.347	0.289
-1.91919	0.45	0.417	0.347	0.289
-1.91119	0.45	0.417	0.347	0.289
-1.90319	0.45	0.417	0.347	0.289
-1.89519	0.45	0.417	0.347	0.289
-1.88719	0.45	0.417	0.347	0.289
-1.87919	0.45	0.417	0.347	0.289
-1.87119	0.45	0.417	0.347	0.289
-1.86319	0.45	0.417	0.347	0.289
-1.85519	0.45	0.417	0.347	0.289
-1.84718	0.45	0.417	0.347	0.289
-1.83918	0.45	0.417	0.347	0.289
-1.83118	0.45	0.417	0.347	0.29
-1.82318	0.45	0.417	0.347	0.29
-1.81518	0.45	0.417	0.347	0.29
-1.80718	0.451	0.417	0.347	0.29
-1.79918	0.451	0.417	0.347	0.29
-1.79118	0.451	0.417	0.347	0.29
-1.78318	0.451	0.417	0.347	0.29
-1.77518	0.451	0.417	0.347	0.29
-1.76718	0.451	0.417	0.347	0.29
-1.75918	0.451	0.417	0.347	0.29
-1.75118	0.451	0.417	0.347	0.29
-1.74317	0.451	0.417	0.347	0.29
-1.73517	0.451	0.417	0.347	0.29
-1.72717	0.451	0.417	0.347	0.29
-1.71917	0.451	0.417	0.347	0.29
-1.71117	0.451	0.417	0.348	0.29
-1.70317	0.451	0.417	0.348	0.29
-1.69517	0.451	0.417	0.348	0.29
-1.68717	0.451	0.417	0.348	0.29
-1.67917	0.451	0.417	0.348	0.29
-1.67117	0.451	0.417	0.348	0.29
-1.66317	0.451	0.417	0.348	0.29
-1.65517	0.451	0.417	0.348	0.29
-1.64716	0.451	0.417	0.348	0.29
-1.63916	0.451	0.417	0.348	0.29
-1.63116	0.451	0.417	0.348	0.29
-1.62316	0.451	0.417	0.348	0.29
-1.61516	0.451	0.417	0.348	0.29
-1.60716	0.451	0.417	0.348	0.29
-1.59916	0.451	0.417	0.348	0.29
-1.59116	0.451	0.417	0.348	0.29
-1.58316	0.451	0.417	0.348	0.291
-1.57516	0.451	0.417	0.348	0.291
-1.56716	0.451	0.417	0.348	0.291
-1.55916	0.451	0.417	0.348	0.291
-1.55116	0.451	0.417	0.348	0.291
-1.54315	0.451	0.417	0.348	0.291
-1.53515	0.451	0.417	0.348	0.291
-1.52715	0.451	0.417	0.348	0.291
-1.51915	0.451	0.417	0.348	0.291
-1.51115	0.451	0.417	0.348	0.291
-1.50315	0.451	0.417	0.348	0.291
-1.49515	0.451	0.417	0.348	0.291
-1.48715	0.451	0.417	0.348	0.291
-1.47915	0.451	0.417	0.348	0.291
-1.47115	0.451	0.417	0.348	0.291
-1.46315	0.451	0.417	0.348	0.291
-1.45515	0.451	0.417	0.348	0.291
-1.44714	0.451	0.417	0.349	0.291
-1.43914	0.451	0.417	0.349	0.291
-1.43114	0.451	0.417	0.349	0.291
-1.42314	0.451	0.417	0.349	0.291
-1.41514	0.451	0.417	0.349	0.291
-1.40714	0.451	0.417	0.349	0.291
-1.39914	0.451	0.417	0.349	0.291
-1.39114	0.451	0.417	0.349	0.291
-1.38314	0.451	0.417	0.349	0.291
-1.37514	0.451	0.417	0.349	0.291
-1.36714	0.451	0.417	0.349	0.291
-1.35914	0.451	0.417	0.349	0.291
-1.35114	0.451	0.417	0.349	0.291
-1.34313	0.451	0.417	0.349	0.292
-1.33513	0.451	0.417	0.349	0.292
-1.32713	0.451	0.417	0.349	0.292
-1.31913	0.451	0.418	0.349	0.292
-1.31113	0.451	0.418	0.349	0.292
-1.30313	0.451	0.418	0.349	0.292
-1.29513	0.451	0.418	0.349	0.292
-1.28713	0.451	0.418	0.349	0.292
-1.27913	0.451	0.418	0.349	0.292
-1.27113	0.451	0.418	0.349	0.292
-1.26313	0.451	0.418	0.349	0.292
-1.25513	0.451	0.418	0.349	0.292
-1.24712	0.451	0.418	0.349	0.292
-1.23912	0.451	0.418	0.349	0.292
-1.23112	0.451	0.418	0.349	0.292
-1.22312	0.451	0.418	0.349	0.292
-1.21512	0.451	0.418	0.349	0.292
-1.20712	0.451	0.418	0.349	0.292
-1.19912	0.451	0.418	0.349	0.292
-1.19112	0.451	0.418	0.349	0.292
-1.18312	0.451	0.418	0.35	0.292
-1.17512	0.451	0.418	0.35	0.292
-1.16712	0.451	0.418	0.35	0.292
-1.15912	0.451	0.418	0.35	0.292
-1.15112	0.451	0.418	0.35	0.292
-1.14311	0.451	0.418	0.35	0.292
-1.13511	0.451	0.418	0.35	0.292
-1.12711	0.451	0.418	0.35	0.292
-1.11911	0.451	0.418	0.35	0.292
-1.11111	0.451	0.418	0.35	0.293
-1.10311	0.451	0.418	0.35	0.293
-1.09511	0.451	0.418	0.35	0.293
-1.08711	0.451	0.418	0.35	0.293
-1.07911	0.451	0.418	0.35	0.293
-1.07111	0.451	0.418	0.35	0.293
-1.06311	0.451	0.418	0.35	0.293
-1.05511	0.452	0.418	0.35	0.293
-1.0471	0.452	0.418	0.35	0.293
-1.0391	0.452	0.418	0.35	0.293
-1.0311	0.452	0.418	0.35	0.293
-1.0231	0.452	0.418	0.35	0.293
-1.0151	0.452	0.418	0.35	0.293
-1.0071	0.452	0.418	0.35	0.293
-0.9991	0.452	0.418	0.35	0.293
-0.991099	0.452	0.418	0.35	0.293
-0.983098	0.452	0.418	0.35	0.293
-0.975098	0.452	0.418	0.35	0.293
-0.967097	0.452	0.418	0.35	0.293
-0.959096	0.452	0.418	0.35	0.293
-0.951095	0.452	0.418	0.35	0.293
-0.943094	0.452	0.418	0.35	0.293
-0.935094	0.452	0.418	0.35	0.293
-0.927093	0.452	0.418	0.351	0.293
-0.919092	0.452	0.418	0.351	0.293
-0.911091	0.452	0.418	0.351	0.293
-0.90309	0.452	0.418	0.351	0.293
-0.89509	0.452	0.418	0.351	0.293
-0.887089	0.452	0.418	0.351	0.293
-0.879088	0.452	0.418	0.351	0.293
-0.871087	0.452	0.418	0.351	0.294
-0.863086	0.452	0.418	0.351	0.294
-0.855086	0.452	0.418	0.351	0.294
-0.847085	0.452	0.418	0.351	0.294
-0.839084	0.452	0.418	0.351	0.294
-0.831083	0.452	0.418	0.351	0.294
-0.823082	0.452	0.418	0.351	0.294
-0.815082	0.452	0.418	0.351	0.294
-0.807081	0.452	0.418	0.351	0.294
-0.79908	0.452	0.418	0.351	0.294
-0.791079	0.452	0.418	0.351	0.294
-0.783078	0.452	0.418	0.351	0.294
-0.775078	0.452	0.418	0.351	0.294
-0.767077	0.452	0.418	0.351	0.294
-0.759076	0.452	0.418	0.351	0.294
-0.751075	0.452	0.418	0.351	0.294
-0.743074	0.452	0.418	0.351	0.294
-0.735074	0.452	0.418	0.351	0.294
-0.727073	0.452	0.418	0.351	0.294
-0.719072	0.452	0.418	0.351	0.294
-0.711071	0.452	0.418	0.351	0.294
-0.70307	0.452	0.418	0.351	0.294
-0.69507	0.452	0.419	0.351	0.294
-0.687069	0.452	0.419	0.351	0.294
-0.679068	0.452	0.419	0.351	0.294
-0.671067	0.452	0.419	0.352	0.294
-0.663066	0.452	0.419	0.352	0.294
-0.655066	0.452	0.419	0.352	0.294
-0.647065	0.452	0.419	0.352	0.294
-0.639064	0.452	0.419	0.352	0.295
-0.631063	0.452	0.419	0.352	0.295
-0.623062	0.452	0.419	0.352	0.295
-0.615062	0.452	0.419	0.352	0.295
-0.607061	0.452	0.419	0.352	0.295
-0.59906	0.452	0.419	0.352	0.295
-0.591059	0.452	0.419	0.352	0.295
-0.583058	0.452	0.419	0.352	0.295
-0.575058	0.452	0.419	0.352	0.295
-0.567057	0.452	0.419	0.352	0.295
-0.559056	0.452	0.419	0.352	0.295
-0.551055	0.452	0.419	0.352	0.295
-0.543054	0.452	0.419	0.352	0.295
-0.535054	0.452	0.419	0.352	0.295
-0.527053	0.452	0.419	0.352	0.295
-0.519052	0.452	0.419	0.352	0.295
-0.511051	0.452	0.419	0.352	0.295
-0.50305	0.452	0.419	0.352	0.295
-0.49505	0.452	0.419	0.352	0.295
-0.487049	0.452	0.419	0.352	0.295
-0.479048	0.452	0.419	0.352	0.295
-0.471047	0.452	0.419	0.352	0.295
-0.463046	0.452	0.419	0.352	0.295
-0.455046	0.452	0.419	0.352	0.295
-0.447045	0.452	0.419	0.352	0.295
-0.439044	0.452	0.419	0.352	0.295
-0.431043	0.452	0.419	0.352	0.295
-0.423042	0.452	0.419	0.352	0.295
-0.415042	0.452	0.419	0.353	0.295
-0.407041	0.452	0.419	0.353	0.296
-0.39904	0.452	0.419	0.353	0.296
-0.391039	0.452	0.419	0.353	0.296
-0.383038	0.452	0.419	0.353	0.296
-0.375038	0.452	0.419	0.353	0.296
-0.367037	0.452	0.419	0.353	0.296
-0.359036	0.452	0.419	0.353	0.296
-0.351035	0.452	0.419	0.353	0.296
-0.343034	0.452	0.419	0.353	0.296
-0.335034	0.452	0.419	0.353	0.296
-0.327033	0.452	0.419	0.353	0.296
-0.319032	0.452	0.419	0.353	0.296
-0.311031	0.453	0.419	0.353	0.296
-0.30303	0.453	0.419	0.353	0.296
-0.29503	0.453	0.419	0.353	0.296
-0.287029	0.453	0.419	0.353	0.296
-0.279028	0.453	0.419	0.353	0.296
-0.271027	0.453	0.419	0.353	0.296
-0.263026	0.453	0.419	0.353	0.296
-0.255026	0.453	0.419	0.353	0.296
-0.247025	0.453	0.419	0.353	0.296
-0.239024	0.453	0.419	0.353	0.296
-0.231023	0.453	0.419	0.353	0.296
-0.223022	0.453	0.419	0.353	0.296
-0.215022	0.453	0.419	0.353	0.296
-0.207021	0.453	0.419	0.353	0.296
-0.19902	0.453	0.419	0.353	0.296
-0.191019	0.453	0.419	0.353	0.296
-0.183018	0.453	0.419	0.353	0.296
-0.175018	0.453	0.419	0.353	0.297
-0.167017	0.453	0.419	0.353	0.297
-0.159016	0.453	0.419	0.354	0.297
-0.151015	0.453	0.419	0.354	0.297
-0.143014	0.453	0.419	0.354	0.297
-0.135014	0.453	0.419	0.354	0.297
-0.127013	0.453	0.419	0.354	0.297
-0.119012	0.453	0.419	0.354	0.297
-0.111011	0.453	0.419	0.354	0.297
-0.10301	0.453	0.419	0.354	0.297
-0.0950095	0.453	0.419	0.354	0.297
-0.0870087	0.453	0.419	0.354	0.297
-0.0790079	0.453	0.419	0.354	0.297
-0.0710071	0.453	0.419	0.354	0.297
-0.0630063	0.453	0.42	0.354	0.297
-0.0550055	0.453	0.42	0.354	0.297
-0.0470047	0.453	0.42	0.354	0.297
-0.0390039	0.453	0.42	0.354	0.297
-0.0310031	0.453	0.42	0.354	0.297
-0.0230023	0.453	0.42	0.354	0.297
-0.0150015	0.453	0.42	0.354	0.297
-0.0070007	0.453	0.42	0.354	0.297
0.0010001	0.453	0.42	0.354	0.297
0.0090009	0.453	0.42	0.354	0.297
0.0170017	0.453	0.42	0.354	0.297
0.0250025	0.453	0.42	0.354	0.297
0.0330033	0.453	0.42	0.354	0.297
0.0410041	0.453	0.42	0.354	0.297
0.0490049	0.453	0.42	0.354	0.297
0.0570057	0.453	0.42	0.354	0.298
0.0650065	0.453	0.42	0.354	0.298
0.0730073	0.453	0.42	0.354	0.298
0.0810081	0.453	0.42	0.354	0.298
0.0890089	0.453	0.42	0.355	0.298
0.0970097	0.453	0.42	0.355	0.298
0.105011	0.453	0.42	0.355	0.298
0.113011	0.453	0.42	0.355	0.298
0.121012	0.453	0.42	0.355	0.298
0.129013	0.453	0.42	0.355	0.298
0.137014	0.453	0.42	0.355	0.298
0.145015	0.453	0.42	0.355	0.298
0.153015	0.453	0.42	0.355	0.298
0.161016	0.453	0.42	0.355	0.298
0.169017	0.453	0.42	0.355	0.298
0.177018	0.453	0.42	0.355	0.298
0.185019	0.453	0.42	0.355	0.298
0.193019	0.453	0.42	0.355	0.298
0.20102	0.453	0.42	0.355	0.298
0.209021	0.453	0.42	0.355	0.298
0.217022	0.453	0.42	0.355	0.298
0.225023	0.453	0.42	0.355	0.298
0.233023	0.453	0.42	0.355	0.298
0.241024	0.453	0.42	0.355	0.298
0.249025	0.453	0.42	0.355	0.298
0.257026	0.453	0.42	0.355	0.298
0.265027	0.453	0.42	0.355	0.298
0.273027	0.453	0.42	0.355	0.298
0.281028	0.453	0.42	0.355	0.299
0.289029	0.453	0.42	0.355	0.299
0.29703	0.453	0.42	0.355	0.299
0.305031	0.453	0.42	0.355	0.299
0.313031	0.453	0.42	0.355	0.299
0.321032	0.453	0.42	0.355	0.299
0.329033	0.453	0.42	0.355	0.299
0.337034	0.453	0.42	0.356	0.299
0.345035	0.453	0.42	0.356	0.299
0.353035	0.453	0.42	0.356	0.299
0.361036	0.453	0.42	0.356	0.299
0.369037	0.453	0.42	0.356	0.299
0.377038	0.453	0.42	0.356	0.299
0.385039	0.453	0.42	0.356	0.299
0.393039	0.453	0.42	0.356	0.299
0.40104	0.453	0.42	0.356	0.299
0.409041	0.453	0.42	0.356	0.299
0.417042	0.453	0.42	0.356	0.299
0.425043	0.453	0.42	0.356	0.299
0.433043	0.453	0.42	0.356	0.299
0.441044	0.454	0.42	0.356	0.299
0.449045	0.454	0.42	0.356	0.299
0.457046	0.454	0.42	0.356	0.299
0.465047	0.454	0.42	0.356	0.299
0.473047	0.454	0.42	0.356	0.299
0.481048	0.454	0.42	0.356	0.299
0.489049	0.454	0.42	0.356	0.299
0.49705	0.454	0.42	0.356	0.299
0.505051	0.454	0.42	0.356	0.3
0.513051	0.454	0.42	0.356	0.3
0.521052	0.454	0.42	0.356	0.3
0.529053	0.454	0.42	0.356	0.3
0.537054	0.454	0.42	0.356	0.3
0.545055	0.454	0.42	0.356	0.3
0.553055	0.454	0.42	0.356	0.3
0.561056	0.454	0.42	0.356	0.3
0.569057	0.454	0.42	0.356	0.3
0.577058	0.454	0.42	0.356	0.3
0.585059	0.454	0.421	0.357	0.3
0.593059	0.454	0.421	0.357	0.3
0.60106	0.454	0.421	0.357	0.3
0.609061	0.454	0.421	0.357	0.3
0.617062	0.454	0.421	0.357	0.3
0.625063	0.454	0.421	0.357	0.3
0.633063	0.454	0.421	0.357	0.3
0.641064	0.454	0.421	0.357	0.3
0.649065	0.454	0.421	0.357	0.3
0.657066	0.454	0.421	0.357	0.3
0.665067	0.454	0.421	0.357	0.3
0.673067	0.454	0.421	0.357	0.3
0.681068	0.454	0.421	0.357	0.3
0.689069	0.454	0.421	0.357	0.3
0.69707	0.454	0.421	0.357	0.3
0.705071	0.454	0.421	0.357	0.3
0.713071	0.454	0.421	0.357	0.3
0.721072	0.454	0.421	0.357	0.3
0.729073	0.454	0.421	0.357	0.301
0.737074	0.454	0.421	0.357	0.301
0.745075	0.454	0.421	0.357	0.301
0.753075	0.454	0.421	0.357	0.301
0.761076	0.454	0.421	0.357	0.301
0.769077	0.454	0.421	0.357	0.301
0.777078	0.454	0.421	0.357	0.301
0.785079	0.454	0.421	0.357	0.301
0.793079	0.454	0.421	0.357	0.301
0.80108	0.454	0.421	0.357	0.301
0.809081	0.454	0.421	0.357	0.301
0.817082	0.454	0.421	0.357	0.301
0.825083	0.454	0.421	0.358	0.301
0.833083	0.454	0.421	0.358	0.301
0.841084	0.454	0.421	0.358	0.301
0.849085	0.454	0.421	0.358	0.301
0.857086	0.454	0.421	0.358	0.301
0.865087	0.454	0.421	0.358	0.301
0.873087	0.454	0.421	0.358	0.301
0.881088	0.454	0.421	0.358	0.301
0.889089	0.454	0.421	0.358	0.301
0.89709	0.454	0.421	0.358	0.301
0.905091	0.454	0.421	0.358	0.301
0.913091	0.454	0.421	0.358	0.301
0.921092	0.454	0.421	0.358	0.301
0.929093	0.454	0.421	0.358	0.301
0.937094	0.454	0.421	0.358	0.301
0.945095	0.454	0.421	0.358	0.301
0.953095	0.454	0.421	0.358	0.302
0.961096	0.454	0.421	0.358	0.302
0.969097	0.454	0.421	0.358	0.302
0.977098	0.454	0.421	0.358	0.302
0.985099	0.454	0.421	0.358	0.302
0.993099	0.454	0.421	0.358	0.302
1.0011	0.454	0.421	0.358	0.302
1.0091	0.454	0.421	0.358	0.302
1.0171	0.454	0.421	0.358	0.302
1.0251	0.454	0.421	0.358	0.302
1.0331	0.454	0.421	0.358	0.302
1.0411	0.454	0.421	0.358	0.302
1.0491	0.454	0.421	0.358	0.302
1.05711	0.454	0.421	0.358	0.302
1.06511	0.454	0.421	0.358	0.302
1.07311	0.454	0.421	0.359	0.302
1.08111	0.454	0.421	0.359	0.302
1.08911	0.454	0.421	0.359	0.302
1.09711	0.454	0.421	0.359	0.302
1.10511	0.454	0.421	0.359	0.302
1.11311	0.454	0.421	0.359	0.302
1.12111	0.454	0.421	0.359	0.302
1.12911	0.454	0.421	0.359	0.302
1.13711	0.454	0.421	0.359	0.302
1.14511	0.454	0.421	0.359	0.302
1.15312	0.454	0.421	0.359	0.302
1.16112	0.454	0.421	0.359	0.302
1.16912	0.454	0.421	0.359	0.303
1.17712	0.454	0.421	0.359	0.303
1.18512	0.455	0.421	0.359	0.303
1.19312	0.455	0.421	0.359	0.303
1.20112	0.455	0.421	0.359	0.303
1.20912	0.455	0.421	0.359	0.303
1.21712	0.455	0.421	0.359	0.303
1.22512	0.455	0.421	0.359	0.303
1.23312	0.455	0.422	0.359	0.303
1.24112	0.455	0.422	0.359	0.303
1.24912	0.455	0.422	0.359	0.303
1.25713	0.455	0.422	0.359	0.303
1.26513	0.455	0.422	0.359	0.303
1.27313	0.455	0.422	0.359	0.303
1.28113	0.455	0.422	0.359	0.303
1.28913	0.455	0.422	0.359	0.303
1.29713	0.455	0.422	0.359	0.303
1.30513	0.455	0.422	0.359	0.303
1.31313	0.455	0.422	0.36	0.303
1.32113	0.455	0.422	0.36	0.303
1.32913	0.455	0.422	0.36	0.303
1.33713	0.455	0.422	0.36	0.303
1.34513	0.455	0.422	0.36	0.303
1.35314	0.455	0.422	0.36	0.303
1.36114	0.455	0.422	0.36	0.303
1.36914	0.455	0.422	0.36	0.303
1.37714	0.455	0.422	0.36	0.303
1.38514	0.455	0.422	0.36	0.303
1.39314	0.455	0.422	0.36	0.304
1.40114	0.455	0.422	0.36	0.304
1.40914	0.455	0.422	0.36	0.304
1.41714	0.455	0.422	0.36	0.304
1.42514	0.455	0.422	0.36	0.304
1.43314	0.455	0.422	0.36	0.304
1.44114	0.455	0.422	0.36	0.304
1.44914	0.455	0.422	0.36	0.304
1.45715	0.455	0.422	0.36	0.304
1.46515	0.455	0.422	0.36	0.304
1.47315	0.455	0.422	0.36	0.304
1.48115	0.455	0.422	0.36	0.304
1.48915	0.455	0.422	0.36	0.304
1.49715	0.455	0.422	0.36	0.304
1.50515	0.455	0.422	0.36	0.304
1.51315	0.455	0.422	0.36	0.304
1.52115	0.455	0.422	0.36	0.304
1.52915	0.455	0.422	0.36	0.304
1.53715	0.455	0.422	0.36	0.304
1.54515	0.455	0.422	0.36	0.304
1.55316	0.455	0.422	0.361	0.304
1.56116	0.455	0.422	0.361	0.304
1.56916	0.455	0.422	0.361	0.304
1.57716	0.455	0.422	0.361	0.304
1.58516	0.455	0.422	0.361	0.304
1.59316	0.455	0.422	0.361	0.304
1.60116	0.455	0.422	0.361	0.304
1.60916	0.455	0.422	0.361	0.305
1.61716	0.455	0.422	0.361	0.305
1.62516	0.455	0.422	0.361	0.305
1.63316	0.455	0.422	0.361	0.305
1.64116	0.455	0.422	0.361	0.305
1.64916	0.455	0.422	0.361	0.305
1.65717	0.455	0.422	0.361	0.305
1.66517	0.455	0.422	0.361	0.305
1.67317	0.455	0.422	0.361	0.305
1.68117	0.455	0.422	0.361	0.305
1.68917	0.455	0.422	0.361	0.305
1.69717	0.455	0.422	0.361	0.305
1.70517	0.455	0.422	0.361	0.305
1.71317	0.455	0.422	0.361	0.305
1.72117	0.455	0.422	0.361	0.305
1.72917	0.455	0.422	0.361	0.305
1.73717	0.455	0.422	0.361	0.305
1.74517	0.455	0.422	0.361	0.305
1.75318	0.455	0.422	0.361	0.305
1.76118	0.455	0.422	0.361	0.305
1.76918	0.455	0.422	0.361	0.305
1.77718	0.455	0.422	0.361	0.305
1.78518	0.455	0.422	0.362	0.305
1.79318	0.455	0.422	0.362	0.305
1.80118	0.455	0.422	0.362	0.305
1.80918	0.455	0.422	0.362	0.305
1.81718	0.455	0.422	0.362	0.305
1.82518	0.455	0.422	0.362	0.306
1.83318	0.455	0.422	0.362	0.306
1.84118	0.455	0.422	0.362	0.306
1.84918	0.455	0.422	0.362	0.306
1.85719	0.455	0.422	0.362	0.306
1.86519	0.455	0.422	0.362	0.306
1.87319	0.455	0.422	0.362	0.306
1.88119	0.455	0.422	0.362	0.306
1.88919	0.455	0.423	0.362	0.306
1.89719	0.455	0.423	0.362	0.306
1.90519	0.455	0.423	0.362	0.306
1.91319	0.455	0.423	0.362	0.306
1.92119	0.455	0.423	0.362	0.306
1.92919	0.455	0.423	0.362	0.306
1.93719	0.456	0.423	0.362	0.306
1.94519	0.456	0.423	0.362	0.306
1.9532	0.456	0.423	0.362	0.306
1.9612	0.456	0.423	0.362	0.306
1.9692	0.456	0.423	0.362	0.306
1.9772	0.456	0.423	0.362	0.306
1.9852	0.456	0.423	0.362	0.306
1.9932	0.456	0.423	0.362	0.306
2.0012	0.456	0.423	0.362	0.306
2.0092	0.456	0.423	0.362	0.306
2.0172	0.456	0.423	0.362	0.306
2.0252	0.456	0.423	0.363	0.306
2.0332	0.456	0.423	0.363	0.306
2.0412	0.456	0.423	0.363	0.307
2.0492	0.456	0.423	0.363	0.307
2.05721	0.456	0.423	0.363	0.307
2.06521	0.456	0.423	0.363	0.307
2.07321	0.456	0.423	0.363	0.307
2.08121	0.456	0.423	0.363	0.307
2.08921	0.456	0.423	0.363	0.307
2.09721	0.456	0.423	0.363	0.307
2.10521	0.456	0.423	0.363	0.307
2.11321	0.456	0.423	0.363	0.307
2.12121	0.456	0.423	0.363	0.307
2.12921	0.456	0.423	0.363	0.307
2.13721	0.456	0.423	0.363	0.307
2.14521	0.456	0.423	0.363	0.307
2.15322	0.456	0.423	0.363	0.307
2.16122	0.456	0.423	0.363	0.307
2.16922	0.456	0.423	0.363	0.307
2.17722	0.456	0.423	0.363	0.307
2.18522	0.456	0.423	0.363	0.307
2.19322	0.456	0.423	0.363	0.307
2.20122	0.456	0.423	0.363	0.307
2.20922	0.456	0.423	0.363	0.307
2.21722	0.456	0.423	0.363	0.307
2.22522	0.456	0.423	0.363	0.307
2.23322	0.456	0.423	0.363	0.307
2.24122	0.456	0.423	0.363	0.307
2.24922	0.456	0.423	0.363	0.307
2.25723	0.456	0.423	0.364	0.308
2.26523	0.456	0.423	0.364	0.308
2.27323	0.456	0.423	0.364	0.308
2.28123	0.456	0.423	0.364	0.308
2.28923	0.456	0.423	0.364	0.308
2.29723	0.456	0.423	0.364	0.308
2.30523	0.456	0.423	0.364	0.308
2.31323	0.456	0.423	0.364	0.308
2.32123	0.456	0.423	0.364	0.308
2.32923	0.456	0.423	0.364	0.308
2.33723	0.456	0.423	0.364	0.308
2.34523	0.456	0.423	0.364	0.308
2.35324	0.456	0.423	0.364	0.308
2.36124	0.456	0.423	0.364	0.308
2.36924	0.456	0.423	0.364	0.308
2.37724	0.456	0.423	0.364	0.308
2.38524	0.456	0.423	0.364	0.308
2.39324	0.456	0.423	0.364	0.308
2.40124	0.456	0.423	0.364	0.308
2.40924	0.456	0.423	0.364	0.308
2.41724	0.456	0.423	0.364	0.308
2.42524	0.456	0.423	0.364	0.308
2.43324	0.456	0.423	0.364	0.308
2.44124	0.456	0.423	0.364	0.308
2.44924	0.456	0.423	0.364	0.308
2.45725	0.456	0.423	0.364	0.308
2.46525	0.456	0.423	0.364	0.308
2.47325	0.456	0.423	0.364	0.309
2.48125	0.456	0.423	0.364	0.309
2.48925	0.456	0.423	0.365	0.309
2.49725	0.456	0.423	0.365	0.309
2.50525	0.456	0.423	0.365	0.309
2.51325	0.456	0.423	0.365	0.309
2.52125	0.456	0.423	0.365	0.309
2.52925	0.456	0.423	0.365	0.309
2.53725	0.456	0.423	0.365	0.309
2.54525	0.456	0.423	0.365	0.309
2.55326	0.456	0.423	0.365	0.309
2.56126	0.456	0.424	0.365	0.309
2.56926	0.456	0.424	0.365	0.309
2.57726	0.456	0.424	0.365	0.309
2.58526	0.456	0.424	0.365	0.309
2.59326	0.456	0.424	0.365	0.309
2.60126	0.456	0.424	0.365	0.309
2.60926	0.456	0.424	0.365	0.309
2.61726	0.456	0.424	0.365	0.309
2.62526	0.456	0.424	0.365	0.309
2.63326	0.456	0.424	0.365	0.309
2.64126	0.456	0.424	0.365	0.309
2.64926	0.456	0.424	0.365	0.309
2.65727	0.456	0.424	0.365	0.309
2.66527	0.456	0.424	0.365	0.309
2.67327	0.456	0.424	0.365	0.309
2.68127	0.456	0.424	0.365	0.309
2.68927	0.457	0.424	0.365	0.31
2.69727	0.457	0.424	0.365	0.31
2.70527	0.457	0.424	0.365	0.31
2.71327	0.457	0.424	0.365	0.31
2.72127	0.457	0.424	0.366	0.31
2.72927	0.457	0.424	0.366	0.31
2.73727	0.457	0.424	0.366	0.31
2.74527	0.457	0.424	0.366	0.31
2.75328	0.457	0.424	0.366	0.31
2.76128	0.457	0.424	0.366	0.31
2.76928	0.457	0.424	0.366	0.31
2.77728	0.457	0.424	0.366	0.31
2.78528	0.457	0.424	0.366	0.31
2.79328	0.457	0.424	0.366	0.31
2.80128	0.457	0.424	0.366	0.31
2.80928	0.457	0.424	0.366	0.31
2.81728	0.457	0.424	0.366	0.31
2.82528	0.457	0.424	0.366	0.31
2.83328	0.457	0.424	0.366	0.31
2.84128	0.457	0.424	0.366	0.31
2.84928	0.457	0.424	0.366	0.31
2.85729	0.457	0.424	0.366	0.31
2.86529	0.457	0.424	0.366	0.31
2.87329	0.457	0.424	0.366	0.31
2.88129	0.457	0.424	0.366	0.31
2.88929	0.457	0.424	0.366	0.31
2.89729	0.457	0.424	0.366	0.311
2.90529	0.457	0.424	0.366	0.311
2.91329	0.457	0.424	0.366	0.311
2.92129	0.457	0.424	0.366	0.311
2.92929	0.457	0.424	0.366	0.311
2.93729	0.457	0.424	0.366	0.311
2.94529	0.457	0.424	0.366	0.311
2.9533	0.457	0.424	0.367	0.311
2.9613	0.457	0.424	0.367	0.311
2.9693	0.457	0.424	0.367	0.311
2.9773	0.457	0.424	0.367	0.311
2.9853	0.457	0.424	0.367	0.311
2.9933	0.457	0.424	0.367	0.311
3.0013	0.457	0.424	0.367	0.311
3.0093	0.457	0.424	0.367	0.311
3.0173	0.457	0.424	0.367	0.311
3.0253	0.457	0.424	0.367	0.311
3.0333	0.457	0.424	0.367	0.311
3.0413	0.457	0.424	0.367	0.311
3.0493	0.457	0.424	0.367	0.311
3.05731	0.457	0.424	0.367	0.311
3.06531	0.457	0.424	0.367	0.311
3.07331	0.457	0.424	0.367	0.311
3.08131	0.457	0.424	0.367	0.311
3.08931	0.457	0.424	0.367	0.311
3.09731	0.457	0.424	0.367	0.311
3.10531	0.457	0.424	0.367	0.311
3.11331	0.457	0.424	0.367	0.312
3.12131	0.457	0.424	0.367	0.312
3.12931	0.457	0.424	0.367	0.312
3.13731	0.457	0.424	0.367	0.312
3.14531	0.457	0.424	0.367	0.312
3.15332	0.457	0.424	0.367	0.312
3.16132	0.457	0.424	0.367	0.312
3.16932	0.457	0.424	0.367	0.312
3.17732	0.457	0.424	0.367	0.312
3.18532	0.457	0.424	0.368	0.312
3.19332	0.457	0.424	0.368	0.312
3.20132	0.457	0.424	0.368	0.312
3.20932	0.457	0.424	0.368	0.312
3.21732	0.457	0.424	0.368	0.312
3.22532	0.457	0.424	0.368	0.312
3.23332	0.457	0.424	0.368	0.312
3.24132	0.457	0.425	0.368	0.312
3.24932	0.457	0.425	0.368	0.312
3.25733	0.457	0.425	0.368	0.312
3.26533	0.457	0.425	0.368	0.312
3.27333	0.457	0.425	0.368	0.312
3.28133	0.457	0.425	0.368	0.312
3.28933	0.457	0.425	0.368	0.312
3.29733	0.457	0.425	0.368	0.312
3.30533	0.457	0.425	0.368	0.312
3.31333	0.457	0.425	0.368	0.312
3.32133	0.457	0.425	0.368	0.313
3.32933	0.457	0.425	0.368	0.313
3.33733	0.457	0.425	0.368	0.313
3.34533	0.457	0.425	0.368	0.313
3.35334	0.457	0.425	0.368	0.313
3.36134	0.457	0.425	0.368	0.313
3.36934	0.457	0.425	0.368	0.313
3.37734	0.457	0.425	0.368	0.313
3.38534	0.457	0.425	0.368	0.313
3.39334	0.457	0.425	0.368	0.313
3.40134	0.457	0.425	0.368	0.313
3.40934	0.457	0.425	0.368	0.313
3.41734	0.457	0.425	0.369	0.313
3.42534	0.457	0.425	0.369	0.313
3.43334	0.457	0.425	0.369	0.313
3.44134	0.458	0.425	0.369	0.313
3.44934	0.458	0.425	0.369	0.313
3.45735	0.458	0.425	0.369	0.313
3.46535	0.458	0.425	0.369	0.313
3.47335	0.458	0.425	0.369	0.313
3.48135	0.458	0.425	0.369	0.313
3.48935	0.458	0.425	0.369	0.313
3.49735	0.458	0.425	0.369	0.313
3.50535	0.458	0.425	0.369	0.313
3.51335	0.458	0.425	0.369	0.313
3.52135	0.458	0.425	0.369	0.313
3.52935	0.458	0.425	0.369	0.314
3.53735	0.458	0.425	0.369	0.314
3.54535	0.458	0.425	0.369	0.314
3.55336	0.458	0.425	0.369	0.314
3.56136	0.458	0.425	0.369	0.314
3.56936	0.458	0.425	0.369	0.314
3.57736	0.458	0.425	0.369	0.314
3.58536	0.458	0.425	0.369	0.314
3.59336	0.458	0.425	0.369	0.314
3.60136	0.458	0.425	0.369	0.314
3.60936	0.458	0.425	0.369	0.314
3.61736	0.458	0.425	0.369	0.314
3.62536	0.458	0.425	0.369	0.314
3.63336	0.458	0.425	0.369	0.314
3.64136	0.458	0.425	0.37	0.314
3.64936	0.458	0.425	0.37	0.314
3.65737	0.458	0.425	0.37	0.314
3.66537	0.458	0.425	0.37	0.314
3.67337	0.458	0.425	0.37	0.314
3.68137	0.458	0.425	0.37	0.314
3.68937	0.458	0.425	0.37	0.314
3.69737	0.458	0.425	0.37	0.314
3.70537	0.458	0.425	0.37	0.314
3.71337	0.458	0.425	0.37	0.314
3.72137	0.458	0.425	0.37	0.314
3.72937	0.458	0.425	0.37	0.314
3.73737	0.458	0.425	0.37	0.315
3.74537	0.458	0.425	0.37	0.315
3.75338	0.458	0.425	0.37	0.315
3.76138	0.458	0.425	0.37	0.315
3.76938	0.458	0.425	0.37	0.315
3.77738	0.458	0.425	0.37	0.315
3.78538	0.458	0.425	0.37	0.315
3.79338	0.458	0.425	0.37	0.315
3.80138	0.458	0.425	0.37	0.315
3.80938	0.458	0.425	0.37	0.315
3.81738	0.458	0.425	0.37	0.315
3.82538	0.458	0.425	0.37	0.315
3.83338	0.458	0.425	0.37	0.315
3.84138	0.458	0.425	0.37	0.315
3.84938	0.458	0.425	0.37	0.315
3.85739	0.458	0.425	0.37	0.315
3.86539	0.458	0.425	0.371	0.315
3.87339	0.458	0.425	0.371	0.315
3.88139	0.458	0.425	0.371	0.315
3.88939	0.458	0.425	0.371	0.315
3.89739	0.458	0.425	0.371	0.315
3.90539	0.458	0.425	0.371	0.315
3.91339	0.458	0.425	0.371	0.315
3.92139	0.458	0.425	0.371	0.315
3.92939	0.458	0.426	0.371	0.315
3.93739	0.458	0.426	0.371	0.315
3.94539	0.458	0.426	0.371	0.316
3.9534	0.458	0.426	0.371	0.316
3.9614	0.458	0.426	0.371	0.316
3.9694	0.458	0.426	0.371	0.316
3.9774	0.458	0.426	0.371	0.316
3.9854	0.458	0.426	0.371	0.316
3.9934	0.458	0.426	0.371	0.316
4.0014	0.458	0.426	0.371	0.316
4.0094	0.458	0.426	0.371	0.316
4.0174	0.458	0.426	0.371	0.316
4.0254	0.458	0.426	0.371	0.316
4.0334	0.458	0.426	0.371	0.316
4.0414	0.458	0.426	0.371	0.316
4.0494	0.458	0.426	0.371	0.316
4.05741	0.458	0.426	0.371	0.316
4.06541	0.458	0.426	0.371	0.316
4.07341	0.458	0.426	0.371	0.316
4.08141	0.458	0.426	0.371	0.316
4.08941	0.458	0.426	0.371	0.316
4.09741	0.458	0.426	0.372	0.316
4.10541	0.458	0.426	0.372	0.316
4.11341	0.458	0.426	0.372	0.316
4.12141	0.458	0.426	0.372	0.316
4.12941	0.458	0.426	0.372	0.316
4.13741	0.458	0.426	0.372	0.316
4.14541	0.458	0.426	0.372	0.316
4.15342	0.458	0.426	0.372	0.317
4.16142	0.458	0.426	0.372	0.317
4.16942	0.458	0.426	0.372	0.317
4.17742	0.458	0.426	0.372	0.317
4.18542	0.458	0.426	0.372	0.317
4.19342	0.458	0.426	0.372	0.317
4.20142	0.458	0.426	0.372	0.317
4.20942	0.459	0.426	0.372	0.317
4.21742	0.459	0.426	0.372	0.317
4.22542	0.459	0.426	0.372	0.317
4.23342	0.459	0.426	0.372	0.317
4.24142	0.459	0.426	0.372	0.317
4.24942	0.459	0.426	0.372	0.317
4.25743	0.459	0.426	0.372	0.317
4.26543	0.459	0.426	0.372	0.317
4.27343	0.459	0.426	0.372	0.317
4.28143	0.459	0.426	0.372	0.317
4.28943	0.459	0.426	0.372	0.317
4.29743	0.459	0.426	0.372	0.317
4.30543	0.459	0.426	0.372	0.317
4.31343	0.459	0.426	0.372	0.317
4.32143	0.459	0.426	0.373	0.317
4.32943	0.459	0.426	0.373	0.317
4.33743	0.459	0.426	0.373	0.317
4.34543	0.459	0.426	0.373	0.317
4.35344	0.459	0.426	0.373	0.317
4.36144	0.459	0.426	0.373	0.318
4.36944	0.459	0.426	0.373	0.318
4.37744	0.459	0.426	0.373	0.318
4.38544	0.459	0.426	0.373	0.318
4.39344	0.459	0.426	0.373	0.318
4.40144	0.459	0.426	0.373	0.318
4.40944	0.459	0.426	0.373	0.318
4.41744	0.459	0.426	0.373	0.318
4.42544	0.459	0.426	0.373	0.318
4.43344	0.459	0.426	0.373	0.318
4.44144	0.459	0.426	0.373	0.318
4.44944	0.459	0.426	0.373	0.318
4.45745	0.459	0.426	0.373	0.318
4.46545	0.459	0.426	0.373	0.318
4.47345	0.459	0.426	0.373	0.318
4.48145	0.459	0.426	0.373	0.318
4.48945	0.459	0.426	0.373	0.318
4.49745	0.459	0.426	0.373	0.318
4.50545	0.459	0.426	0.373	0.318
4.51345	0.459	0.426	0.373	0.318
4.52145	0.459	0.426	0.373	0.318
4.52945	0.459	0.426	0.373	0.318
4.53745	0.459	0.426	0.373	0.318
4.54545	0.459	0.426	0.374	0.318
4.55346	0.459	0.426	0.374	0.318
4.56146	0.459	0.426	0.374	0.319
4.56946	0.459	0.426	0.374	0.319
4.57746	0.459	0.426	0.374	0.319
4.58546	0.459	0.426	0.374	0.319
4.59346	0.459	0.426	0.374	0.319
4.60146	0.459	0.426	0.374	0.319
4.60946	0.459	0.426	0.374	0.319
4.61746	0.459	0.426	0.374	0.319
4.62546	0.459	0.427	0.374	0.319
4.63346	0.459	0.427	0.374	0.319
4.64146	0.459	0.427	0.374	0.319
4.64946	0.459	0.427	0.374	0.319
4.65747	0.459	0.427	0.374	0.319
4.66547	0.459	0.427	0.374	0.319
4.67347	0.459	0.427	0.374	0.319
4.68147	0.459	0.427	0.374	0.319
4.68947	0.459	0.427	0.374	0.319
4.69747	0.459	0.427	0.374	0.319
4.70547	0.459	0.427	0.374	0.319
4.71347	0.459	0.427	0.374	0.319
4.72147	0.459	0.427	0.374	0.319
4.72947	0.459	0.427	0.374	0.319
4.73747	0.459	0.427	0.374	0.319
4.74547	0.459	0.427	0.374	0.319
4.75348	0.459	0.427	0.374	0.319
4.76148	0.459	0.427	0.374	0.319
4.76948	0.459	0.427	0.375	0.32
4.77748	0.459	0.427	0.375	0.32
4.78548	0.459	0.427	0.375	0.32
4.79348	0.459	0.427	0.375	0.32
4.80148	0.459	0.427	0.375	0.32
4.80948	0.459	0.427	0.375	0.32
4.81748	0.459	0.427	0.375	0.32
4.82548	0.459	0.427	0.375	0.32
4.83348	0.459	0.427	0.375	0.32
4.84148	0.459	0.427	0.375	0.32
4.84948	0.459	0.427	0.375	0.32
4.85749	0.459	0.427	0.375	0.32
4.86549	0.459	0.427	0.375	0.32
4.87349	0.459	0.427	0.375	0.32
4.88149	0.459	0.427	0.375	0.32
4.88949	0.459	0.427	0.375	0.32
4.89749	0.459	0.427	0.375	0.32
4.90549	0.459	0.427	0.375	0.32
4.91349	0.459	0.427	0.375	0.32
4.92149	0.459	0.427	0.375	0.32
4.92949	0.459	0.427	0.375	0.32
4.93749	0.459	0.427	0.375	0.32
4.94549	0.459	0.427	0.375	0.32
4.9535	0.459	0.427	0.375	0.32
4.9615	0.459	0.427	0.375	0.32
4.9695	0.459	0.427	0.375	0.32
4.9775	0.459	0.427	0.375	0.321
4.9855	0.46	0.427	0.376	0.321
4.9935	0.46	0.427	0.376	0.321
5.0015	0.46	0.427	0.376	0.321
5.0095	0.46	0.427	0.376	0.321
5.0175	0.46	0.427	0.376	0.321
5.0255	0.46	0.427	0.376	0.321
5.0335	0.46	0.427	0.376	0.321
5.0415	0.46	0.427	0.376	0.321
5.0495	0.46	0.427	0.376	0.321
5.05751	0.46	0.427	0.376	0.321
5.06551	0.46	0.427	0.376	0.321
5.07351	0.46	0.427	0.376	0.321
5.08151	0.46	0.427	0.376	0.321
5.08951	0.46	0.427	0.376	0.321
5.09751	0.46	0.427	0.376	0.321
5.10551	0.46	0.427	0.376	0.321
5.11351	0.46	0.427	0.376	0.321
5.12151	0.46	0.427	0.376	0.321
5.12951	0.46	0.427	0.376	0.321
5.13751	0.46	0.427	0.376	0.321
5.14551	0.46	0.427	0.376	0.321
5.15352	0.46	0.427	0.376	0.321
5.16152	0.46	0.427	0.376	0.321
5.16952	0.46	0.427	0.376	0.321
5.17752	0.46	0.427	0.376	0.322
5.18552	0.46	0.427	0.376	0.322
5.19352	0.46	0.427	0.376	0.322
5.20152	0.46	0.427	0.376	0.322
5.20952	0.46	0.427	0.377	0.322
5.21752	0.46	0.427	0.377	0.322
5.22552	0.46	0.427	0.377	0.322
5.23352	0.46	0.427	0.377	0.322
5.24152	0.46	0.427	0.377	0.322
5.24952	0.46	0.427	0.377	0.322
5.25753	0.46	0.427	0.377	0.322
5.26553	0.46	0.427	0.377	0.322
5.27353	0.46	0.427	0.377	0.322
5.28153	0.46	0.427	0.377	0.322
5.28953	0.46	0.427	0.377	0.322
5.29753	0.46	0.427	0.377	0.322
5.30553	0.46	0.427	0.377	0.322
5.31353	0.46	0.427	0.377	0.322
5.32153	0.46	0.427	0.377	0.322
5.32953	0.46	0.427	0.377	0.322
5.33753	0.46	0.427	0.377	0.322
5.34553	0.46	0.427	0.377	0.322
5.35354	0.46	0.428	0.377	0.322
5.36154	0.46	0.428	0.377	0.322
5.36954	0.46	0.428	0.377	0.322
5.37754	0.46	0.428	0.377	0.322
5.38554	0.46	0.428	0.377	0.323
5.39354	0.46	0.428	0.377	0.323
5.40154	0.46	0.428	0.377	0.323
5.40954	0.46	0.428	0.377	0.323
5.41754	0.46	0.428	0.377	0.323
5.42554	0.46	0.428	0.377	0.323
5.43354	0.46	0.428	0.378	0.323
5.44154	0.46	0.428	0.378	0.323
5.44954	0.46	0.428	0.378	0.323
5.45755	0.46	0.428	0.378	0.323
5.46555	0.46	0.428	0.378	0.323
5.47355	0.46	0.428	0.378	0.323
5.48155	0.46	0.428	0.378	0.323
5.48955	0.46	0.428	0.378	0.323
5.49755	0.46	0.428	0.378	0.323
5.50555	0.46	0.428	0.378	0.323
5.51355	0.46	0.428	0.378	0.323
5.52155	0.46	0.428	0.378	0.323
5.52955	0.46	0.428	0.378	0.323
5.53755	0.46	0.428	0.378	0.323
5.54555	0.46	0.428	0.378	0.323
5.55356	0.46	0.428	0.378	0.323
5.56156	0.46	0.428	0.378	0.323
5.56956	0.46	0.428	0.378	0.323
5.57756	0.46	0.428	0.378	0.323
5.58556	0.46	0.428	0.378	0.324
5.59356	0.46	0.428	0.378	0.324
5.60156	0.46	0.428	0.378	0.324
5.60956	0.46	0.428	0.378	0.324
5.61756	0.46	0.428	0.378	0.324
5.62556	0.46	0.428	0.378	0.324
5.63356	0.46	0.428	0.378	0.324
5.64156	0.46	0.428	0.378	0.324
5.64956	0.46	0.428	0.378	0.324
5.65757	0.46	0.428	0.379	0.324
5.66557	0.46	0.428	0.379	0.324
5.67357	0.46	0.428	0.379	0.324
5.68157	0.46	0.428	0.379	0.324
5.68957	0.46	0.428	0.379	0.324
5.69757	0.46	0.428	0.379	0.324
5.70557	0.46	0.428	0.379	0.324
5.71357	0.46	0.428	0.379	0.324
5.72157	0.46	0.428	0.379	0.324
5.72957	0.46	0.428	0.379	0.324
5.73757	0.46	0.428	0.379	0.324
5.74557	0.46	0.428	0.379	0.324
5.75358	0.46	0.428	0.379	0.324
5.76158	0.46	0.428	0.379	0.324
5.76958	0.46	0.428	0.379	0.324
5.77758	0.46	0.428	0.379	0.324
5.78558	0.46	0.428	0.379	0.324
5.79358	0.46	0.428	0.379	0.325
5.80158	0.46	0.428	0.379	0.325
5.80958	0.46	0.428	0.379	0.325
5.81758	0.461	0.428	0.379	0.325
5.82558	0.461	0.428	0.379	0.325
5.83358	0.461	0.428	0.379	0.325
5.84158	0.461	0.428	0.379	0.325
5.84958	0.461	0.428	0.379	0.325
5.85759	0.461	0.428	0.379	0.325
5.86559	0.461	0.428	0.379	0.325
5.87359	0.461	0.428	0.38	0.325
5.88159	0.461	0.428	0.38	0.325
5.88959	0.461	0.428	0.38	0.325
5.89759	0.461	0.428	0.38	0.325
5.90559	0.461	0.428	0.38	0.325
5.91359	0.461	0.428	0.38	0.325
5.92159	0.461	0.428	0.38	0.325
5.92959	0.461	0.428	0.38	0.325
5.93759	0.461	0.428	0.38	0.325
5.94559	0.461	0.428	0.38	0.325
5.9536	0.461	0.428	0.38	0.325
5.9616	0.461	0.428	0.38	0.325
5.9696	0.461	0.428	0.38	0.325
5.9776	0.461	0.428	0.38	0.325
5.9856	0.461	0.428	0.38	0.325
[truncated: 8,001 more rows]

## Sheet: Figure-S1D
time(min)	xhb_WT(EL)	xhb_Stau-(EL)	xhb_Bcd1.0(EL)
-13	0.324	0	0.324
-12.992	0.324	0.313	0.324
-12.984	0.324	0.313	0.324
-12.976	0.324	0.313	0.324
-12.968	0.324	0.313	0.324
-12.96	0.324	0.313	0.324
-12.952	0.324	0.313	0.324
-12.944	0.324	0.313	0.325
-12.936	0.324	0.313	0.325
-12.928	0.324	0.313	0.325
-12.92	0.324	0.313	0.325
-12.912	0.324	0.313	0.325
-12.904	0.325	0.313	0.325
-12.896	0.325	0.313	0.325
-12.888	0.325	0.313	0.325
-12.88	0.325	0.313	0.326
-12.872	0.325	0.313	0.326
-12.864	0.325	0.313	0.326
-12.856	0.325	0.313	0.326
-12.848	0.325	0.313	0.326
-12.84	0.325	0.313	0.326
-12.832	0.325	0.313	0.326
-12.824	0.325	0.314	0.326
-12.816	0.325	0.314	0.326
-12.808	0.326	0.314	0.326
-12.8	0.326	0.314	0.327
-12.792	0.326	0.314	0.327
-12.784	0.326	0.314	0.327
-12.776	0.326	0.314	0.327
-12.768	0.326	0.314	0.327
-12.76	0.326	0.314	0.327
-12.752	0.326	0.314	0.327
-12.744	0.326	0.314	0.327
-12.736	0.326	0.314	0.327
-12.728	0.327	0.314	0.327
-12.72	0.327	0.314	0.327
-12.712	0.327	0.314	0.327
-12.704	0.327	0.314	0.328
-12.696	0.327	0.314	0.328
-12.688	0.327	0.314	0.328
-12.68	0.327	0.314	0.328
-12.672	0.327	0.314	0.328
-12.664	0.327	0.314	0.328
-12.656	0.327	0.314	0.328
-12.648	0.328	0.314	0.328
-12.64	0.328	0.314	0.328
-12.632	0.328	0.314	0.328
-12.624	0.328	0.314	0.328
-12.616	0.328	0.314	0.328
-12.608	0.328	0.314	0.328
-12.6	0.328	0.314	0.328
-12.592	0.328	0.314	0.328
-12.584	0.328	0.314	0.329
-12.576	0.329	0.314	0.329
-12.568	0.329	0.314	0.329
-12.56	0.329	0.314	0.329
-12.552	0.329	0.314	0.329
-12.544	0.329	0.314	0.329
-12.536	0.329	0.314	0.329
-12.528	0.329	0.314	0.329
-12.52	0.329	0.314	0.329
-12.512	0.33	0.314	0.329
-12.504	0.33	0.314	0.329
-12.4959	0.33	0.314	0.329
-12.4879	0.33	0.314	0.329
-12.4799	0.33	0.314	0.329
-12.4719	0.33	0.314	0.329
-12.4639	0.33	0.315	0.329
-12.4559	0.33	0.315	0.329
-12.4479	0.331	0.315	0.329
-12.4399	0.331	0.315	0.329
-12.4319	0.331	0.315	0.329
-12.4239	0.331	0.315	0.33
-12.4159	0.331	0.315	0.33
-12.4079	0.331	0.315	0.33
-12.3999	0.331	0.315	0.33
-12.3919	0.332	0.315	0.33
-12.3839	0.332	0.315	0.33
-12.3759	0.332	0.315	0.33
-12.3679	0.332	0.315	0.33
-12.3599	0.332	0.315	0.33
-12.3519	0.332	0.315	0.33
-12.3439	0.333	0.315	0.33
-12.3359	0.333	0.315	0.33
-12.3279	0.333	0.315	0.33
-12.3199	0.333	0.315	0.33
-12.3119	0.333	0.315	0.33
-12.3039	0.333	0.315	0.33
-12.2959	0.333	0.315	0.33
-12.2879	0.334	0.315	0.33
-12.2799	0.334	0.315	0.33
-12.2719	0.334	0.315	0.33
-12.2639	0.334	0.315	0.33
-12.2559	0.334	0.315	0.33
-12.2479	0.335	0.315	0.33
-12.2399	0.335	0.315	0.33
-12.2319	0.335	0.315	0.33
-12.2239	0.335	0.315	0.33
-12.2159	0.335	0.315	0.331
-12.2079	0.336	0.315	0.331
-12.1999	0.336	0.315	0.331
-12.1919	0.336	0.315	0.331
-12.1839	0.336	0.315	0.331
-12.1759	0.336	0.315	0.331
-12.1679	0.337	0.315	0.331
-12.1599	0.337	0.315	0.331
-12.1519	0.337	0.315	0.331
-12.1439	0.337	0.315	0.331
-12.1359	0.338	0.315	0.331
-12.1279	0.338	0.315	0.331
-12.1199	0.338	0.316	0.331
-12.1119	0.338	0.316	0.331
-12.1039	0.339	0.316	0.331
-12.0959	0.339	0.316	0.331
-12.0879	0.339	0.316	0.331
-12.0799	0.339	0.316	0.331
-12.0719	0.34	0.316	0.331
-12.0639	0.34	0.316	0.331
-12.0559	0.34	0.316	0.331
-12.0479	0.341	0.316	0.331
-12.0399	0.341	0.316	0.331
-12.0319	0.341	0.316	0.331
-12.0239	0.342	0.316	0.331
-12.0159	0.342	0.316	0.331
-12.0079	0.342	0.316	0.331
-11.9999	0.343	0.316	0.331
-11.9919	0.343	0.316	0.331
-11.9839	0.344	0.316	0.331
-11.9759	0.344	0.316	0.331
-11.9679	0.345	0.316	0.331
-11.9599	0.345	0.316	0.331
-11.9519	0.346	0.316	0.331
-11.9439	0.346	0.316	0.331
-11.9359	0.347	0.316	0.332
-11.9279	0.403	0.316	0.332
-11.9199	0.403	0.316	0.332
-11.9119	0.404	0.316	0.332
-11.9039	0.405	0.316	0.332
-11.8959	0.405	0.316	0.332
-11.8879	0.406	0.316	0.332
-11.8799	0.406	0.316	0.332
-11.8719	0.407	0.316	0.332
-11.8639	0.407	0.316	0.332
-11.8559	0.408	0.316	0.332
-11.8479	0.408	0.316	0.332
-11.8399	0.409	0.316	0.332
-11.8319	0.409	0.316	0.332
-11.8239	0.41	0.316	0.332
-11.8159	0.41	0.316	0.332
-11.8079	0.41	0.316	0.332
-11.7999	0.411	0.316	0.332
-11.7919	0.411	0.317	0.332
-11.7839	0.411	0.317	0.332
-11.7759	0.411	0.317	0.332
-11.7679	0.412	0.317	0.332
-11.7599	0.412	0.317	0.332
-11.7519	0.412	0.317	0.332
-11.7439	0.413	0.317	0.332
-11.7359	0.413	0.317	0.332
-11.7279	0.413	0.317	0.332
-11.7199	0.413	0.317	0.332
-11.7119	0.414	0.317	0.332
-11.7039	0.414	0.317	0.332
-11.6959	0.414	0.317	0.332
-11.6879	0.414	0.317	0.332
-11.6799	0.414	0.317	0.332
-11.6719	0.415	0.317	0.332
-11.6639	0.415	0.317	0.332
-11.6559	0.415	0.317	0.332
-11.6479	0.415	0.317	0.332
-11.6399	0.415	0.317	0.332
-11.6319	0.416	0.317	0.332
-11.6239	0.416	0.317	0.332
-11.6159	0.416	0.317	0.332
-11.6079	0.416	0.317	0.332
-11.5999	0.416	0.317	0.332
-11.5919	0.417	0.317	0.332
-11.5839	0.417	0.317	0.332
-11.5759	0.417	0.317	0.332
-11.5679	0.417	0.317	0.332
-11.5599	0.417	0.317	0.333
-11.5519	0.417	0.317	0.333
-11.5439	0.417	0.317	0.333
-11.5359	0.418	0.317	0.333
-11.5279	0.418	0.317	0.333
-11.5199	0.418	0.317	0.333
-11.5119	0.418	0.317	0.333
-11.5039	0.418	0.317	0.333
-11.4958	0.418	0.317	0.333
-11.4878	0.418	0.317	0.333
-11.4798	0.419	0.317	0.333
-11.4718	0.419	0.318	0.333
-11.4638	0.419	0.318	0.333
-11.4558	0.419	0.318	0.333
-11.4478	0.419	0.318	0.333
-11.4398	0.419	0.318	0.333
-11.4318	0.419	0.318	0.333
-11.4238	0.419	0.318	0.333
-11.4158	0.42	0.318	0.333
-11.4078	0.42	0.318	0.333
-11.3998	0.42	0.318	0.333
-11.3918	0.42	0.318	0.333
-11.3838	0.42	0.318	0.333
-11.3758	0.42	0.318	0.333
-11.3678	0.42	0.318	0.333
-11.3598	0.42	0.318	0.333
-11.3518	0.42	0.318	0.333
-11.3438	0.421	0.318	0.333
-11.3358	0.421	0.318	0.333
-11.3278	0.421	0.318	0.333
-11.3198	0.421	0.318	0.333
-11.3118	0.421	0.318	0.333
-11.3038	0.421	0.318	0.333
-11.2958	0.421	0.318	0.333
-11.2878	0.421	0.318	0.333
-11.2798	0.421	0.318	0.333
-11.2718	0.421	0.318	0.333
-11.2638	0.422	0.318	0.333
-11.2558	0.422	0.318	0.333
-11.2478	0.422	0.318	0.333
-11.2398	0.422	0.318	0.333
-11.2318	0.422	0.318	0.333
-11.2238	0.422	0.318	0.333
-11.2158	0.422	0.318	0.333
-11.2078	0.422	0.318	0.333
-11.1998	0.422	0.318	0.333
-11.1918	0.422	0.318	0.333
-11.1838	0.422	0.318	0.333
-11.1758	0.422	0.318	0.333
-11.1678	0.423	0.318	0.333
-11.1598	0.423	0.319	0.333
-11.1518	0.423	0.319	0.333
-11.1438	0.423	0.319	0.333
-11.1358	0.423	0.319	0.333
-11.1278	0.423	0.319	0.333
-11.1198	0.423	0.319	0.333
-11.1118	0.423	0.319	0.333
-11.1038	0.423	0.319	0.333
-11.0958	0.423	0.319	0.333
-11.0878	0.423	0.319	0.333
-11.0798	0.423	0.319	0.333
-11.0718	0.423	0.319	0.333
-11.0638	0.423	0.319	0.334
-11.0558	0.424	0.319	0.334
-11.0478	0.424	0.319	0.334
-11.0398	0.424	0.319	0.334
-11.0318	0.424	0.319	0.334
-11.0238	0.424	0.319	0.334
-11.0158	0.424	0.319	0.334
-11.0078	0.424	0.319	0.334
-10.9998	0.424	0.319	0.334
-10.9918	0.424	0.319	0.334
-10.9838	0.424	0.319	0.334
-10.9758	0.424	0.319	0.334
-10.9678	0.424	0.319	0.334
-10.9598	0.424	0.319	0.334
-10.9518	0.424	0.319	0.334
-10.9438	0.424	0.319	0.334
-10.9358	0.425	0.319	0.334
-10.9278	0.425	0.319	0.334
-10.9198	0.425	0.319	0.334
-10.9118	0.425	0.319	0.334
-10.9038	0.425	0.319	0.334
-10.8958	0.425	0.319	0.334
-10.8878	0.425	0.319	0.334
-10.8798	0.425	0.319	0.334
-10.8718	0.425	0.319	0.334
-10.8638	0.425	0.319	0.334
-10.8558	0.425	0.32	0.334
-10.8478	0.425	0.32	0.334
-10.8398	0.425	0.32	0.334
-10.8318	0.425	0.32	0.334
-10.8238	0.425	0.32	0.334
-10.8158	0.425	0.32	0.334
-10.8078	0.425	0.32	0.334
-10.7998	0.425	0.32	0.334
-10.7918	0.425	0.32	0.334
-10.7838	0.426	0.32	0.334
-10.7758	0.426	0.32	0.334
-10.7678	0.426	0.32	0.334
-10.7598	0.426	0.32	0.334
-10.7518	0.426	0.32	0.334
-10.7438	0.426	0.32	0.334
-10.7358	0.426	0.32	0.334
-10.7278	0.426	0.32	0.334
-10.7198	0.426	0.32	0.334
-10.7118	0.426	0.32	0.334
-10.7038	0.426	0.32	0.334
-10.6958	0.426	0.32	0.334
-10.6878	0.426	0.32	0.334
-10.6798	0.426	0.32	0.334
-10.6718	0.426	0.32	0.334
-10.6638	0.426	0.32	0.334
-10.6558	0.426	0.32	0.334
-10.6478	0.426	0.32	0.334
-10.6398	0.426	0.32	0.334
-10.6318	0.426	0.32	0.334
-10.6238	0.426	0.32	0.334
-10.6158	0.426	0.32	0.334
-10.6078	0.427	0.32	0.334
-10.5998	0.427	0.32	0.334
-10.5918	0.427	0.32	0.334
-10.5838	0.427	0.32	0.334
-10.5758	0.427	0.32	0.334
-10.5678	0.427	0.32	0.334
-10.5598	0.427	0.321	0.334
-10.5518	0.427	0.321	0.334
-10.5438	0.427	0.321	0.334
-10.5358	0.427	0.321	0.334
-10.5278	0.427	0.321	0.334
-10.5198	0.427	0.321	0.334
-10.5118	0.427	0.321	0.334
-10.5038	0.427	0.321	0.334
-10.4957	0.427	0.321	0.334
-10.4877	0.427	0.321	0.334
-10.4797	0.427	0.321	0.334
-10.4717	0.427	0.321	0.334
-10.4637	0.427	0.321	0.334
-10.4557	0.427	0.321	0.334
-10.4477	0.427	0.321	0.334
-10.4397	0.427	0.321	0.334
-10.4317	0.427	0.321	0.335
-10.4237	0.427	0.321	0.335
-10.4157	0.427	0.321	0.335
-10.4077	0.428	0.321	0.335
-10.3997	0.428	0.321	0.335
-10.3917	0.428	0.321	0.335
-10.3837	0.428	0.321	0.335
-10.3757	0.428	0.321	0.335
-10.3677	0.428	0.321	0.335
-10.3597	0.428	0.321	0.335
-10.3517	0.428	0.321	0.335
-10.3437	0.428	0.321	0.335
-10.3357	0.428	0.321	0.335
-10.3277	0.428	0.321	0.335
-10.3197	0.428	0.321	0.335
-10.3117	0.428	0.321	0.335
-10.3037	0.428	0.321	0.335
-10.2957	0.428	0.321	0.335
-10.2877	0.428	0.321	0.335
-10.2797	0.428	0.321	0.335
-10.2717	0.428	0.321	0.335
-10.2637	0.428	0.322	0.335
-10.2557	0.428	0.322	0.335
-10.2477	0.428	0.322	0.335
-10.2397	0.428	0.322	0.335
-10.2317	0.428	0.322	0.335
-10.2237	0.428	0.322	0.335
-10.2157	0.428	0.322	0.335
-10.2077	0.428	0.322	0.335
-10.1997	0.428	0.322	0.335
-10.1917	0.428	0.322	0.335
-10.1837	0.428	0.322	0.335
-10.1757	0.428	0.322	0.335
-10.1677	0.428	0.322	0.335
-10.1597	0.429	0.322	0.335
-10.1517	0.429	0.322	0.335
-10.1437	0.429	0.322	0.335
-10.1357	0.429	0.322	0.335
-10.1277	0.429	0.322	0.335
-10.1197	0.429	0.322	0.335
-10.1117	0.429	0.322	0.335
-10.1037	0.429	0.322	0.335
-10.0957	0.429	0.322	0.335
-10.0877	0.429	0.322	0.335
-10.0797	0.429	0.322	0.335
-10.0717	0.429	0.322	0.335
-10.0637	0.429	0.322	0.335
-10.0557	0.429	0.322	0.335
-10.0477	0.429	0.322	0.335
-10.0397	0.429	0.322	0.335
-10.0317	0.429	0.322	0.335
-10.0237	0.429	0.322	0.335
-10.0157	0.429	0.322	0.335
-10.0077	0.429	0.322	0.335
-9.9997	0.429	0.322	0.335
-9.9917	0.429	0.322	0.335
-9.9837	0.429	0.322	0.335
-9.9757	0.429	0.323	0.335
-9.9677	0.429	0.323	0.335
-9.9597	0.429	0.323	0.335
-9.9517	0.429	0.323	0.335
-9.94369	0.429	0.323	0.335
-9.93569	0.429	0.323	0.335
-9.92769	0.429	0.323	0.335
-9.91969	0.429	0.323	0.335
-9.91169	0.429	0.323	0.335
-9.90369	0.429	0.323	0.335
-9.89569	0.429	0.323	0.335
-9.88769	0.429	0.323	0.335
-9.87969	0.429	0.323	0.335
-9.87169	0.429	0.323	0.335
-9.86369	0.43	0.323	0.335
-9.85569	0.43	0.323	0.335
-9.84768	0.43	0.323	0.335
-9.83968	0.43	0.323	0.335
-9.83168	0.43	0.323	0.335
-9.82368	0.43	0.323	0.335
-9.81568	0.43	0.323	0.335
-9.80768	0.43	0.323	0.335
-9.79968	0.43	0.323	0.335
-9.79168	0.43	0.323	0.335
-9.78368	0.43	0.323	0.335
-9.77568	0.43	0.323	0.335
-9.76768	0.43	0.323	0.335
-9.75968	0.43	0.323	0.335
-9.75168	0.43	0.323	0.335
-9.74367	0.43	0.323	0.335
-9.73567	0.43	0.323	0.335
-9.72767	0.43	0.323	0.335
-9.71967	0.43	0.323	0.335
-9.71167	0.43	0.323	0.335
-9.70367	0.43	0.323	0.335
-9.69567	0.43	0.324	0.335
-9.68767	0.43	0.324	0.335
-9.67967	0.43	0.324	0.336
-9.67167	0.43	0.324	0.336
-9.66367	0.43	0.324	0.336
-9.65567	0.43	0.324	0.336
-9.64766	0.43	0.324	0.336
-9.63966	0.43	0.324	0.336
-9.63166	0.43	0.324	0.336
-9.62366	0.43	0.324	0.336
-9.61566	0.43	0.324	0.336
-9.60766	0.43	0.324	0.336
-9.59966	0.43	0.324	0.336
-9.59166	0.43	0.324	0.336
-9.58366	0.43	0.324	0.336
-9.57566	0.43	0.324	0.336
-9.56766	0.43	0.324	0.336
-9.55966	0.43	0.324	0.336
-9.55166	0.43	0.324	0.336
-9.54365	0.43	0.324	0.336
-9.53565	0.43	0.324	0.336
-9.52765	0.43	0.324	0.336
-9.51965	0.43	0.324	0.336
-9.51165	0.431	0.324	0.336
-9.50365	0.431	0.324	0.336
-9.49565	0.431	0.324	0.336
-9.48765	0.431	0.324	0.336
-9.47965	0.431	0.324	0.336
-9.47165	0.431	0.324	0.336
-9.46365	0.431	0.324	0.336
-9.45565	0.431	0.324	0.336
-9.44764	0.431	0.324	0.336
-9.43964	0.431	0.324	0.336
-9.43164	0.431	0.324	0.336
-9.42364	0.431	0.325	0.336
-9.41564	0.431	0.325	0.336
-9.40764	0.431	0.325	0.336
-9.39964	0.431	0.325	0.336
-9.39164	0.431	0.325	0.336
-9.38364	0.431	0.325	0.336
-9.37564	0.431	0.325	0.336
-9.36764	0.431	0.325	0.336
-9.35964	0.431	0.325	0.336
-9.35164	0.431	0.325	0.336
-9.34363	0.431	0.325	0.336
-9.33563	0.431	0.325	0.336
-9.32763	0.431	0.325	0.336
-9.31963	0.431	0.325	0.336
-9.31163	0.431	0.325	0.336
-9.30363	0.431	0.325	0.336
-9.29563	0.431	0.325	0.336
-9.28763	0.431	0.325	0.336
-9.27963	0.431	0.325	0.336
-9.27163	0.431	0.325	0.336
-9.26363	0.431	0.325	0.336
-9.25563	0.431	0.325	0.336
-9.24762	0.431	0.325	0.336
-9.23962	0.431	0.325	0.336
-9.23162	0.431	0.325	0.336
-9.22362	0.431	0.325	0.336
-9.21562	0.431	0.325	0.336
-9.20762	0.431	0.325	0.336
-9.19962	0.431	0.325	0.336
-9.19162	0.431	0.325	0.336
-9.18362	0.431	0.325	0.336
-9.17562	0.431	0.325	0.336
-9.16762	0.431	0.325	0.336
-9.15962	0.431	0.325	0.336
-9.15162	0.431	0.326	0.336
-9.14361	0.431	0.326	0.336
-9.13561	0.431	0.326	0.336
-9.12761	0.431	0.326	0.336
-9.11961	0.431	0.326	0.336
-9.11161	0.431	0.326	0.336
-9.10361	0.431	0.326	0.336
-9.09561	0.431	0.326	0.336
-9.08761	0.431	0.326	0.336
-9.07961	0.432	0.326	0.336
-9.07161	0.432	0.326	0.336
-9.06361	0.432	0.326	0.336
-9.05561	0.432	0.326	0.336
-9.0476	0.432	0.326	0.336
-9.0396	0.432	0.326	0.336
-9.0316	0.432	0.326	0.336
-9.0236	0.432	0.326	0.336
-9.0156	0.432	0.326	0.336
-9.0076	0.432	0.326	0.336
-8.9996	0.432	0.326	0.336
-8.9916	0.432	0.326	0.336
-8.9836	0.432	0.326	0.336
-8.9756	0.432	0.326	0.336
-8.9676	0.432	0.326	0.336
-8.9596	0.432	0.326	0.336
-8.9516	0.432	0.326	0.336
-8.94359	0.432	0.326	0.336
-8.93559	0.432	0.326	0.336
-8.92759	0.432	0.326	0.336
-8.91959	0.432	0.326	0.336
-8.91159	0.432	0.326	0.336
-8.90359	0.432	0.326	0.336
-8.89559	0.432	0.326	0.336
-8.88759	0.432	0.327	0.336
-8.87959	0.432	0.327	0.336
-8.87159	0.432	0.327	0.336
-8.86359	0.432	0.327	0.336
-8.85559	0.432	0.327	0.336
-8.84758	0.432	0.327	0.336
-8.83958	0.432	0.327	0.336
-8.83158	0.432	0.327	0.336
-8.82358	0.432	0.327	0.336
-8.81558	0.432	0.327	0.337
-8.80758	0.432	0.327	0.337
-8.79958	0.432	0.327	0.337
-8.79158	0.432	0.327	0.337
-8.78358	0.432	0.327	0.337
-8.77558	0.432	0.327	0.337
-8.76758	0.432	0.327	0.337
-8.75958	0.432	0.327	0.337
-8.75158	0.432	0.327	0.337
-8.74357	0.432	0.327	0.337
-8.73557	0.432	0.327	0.337
-8.72757	0.432	0.327	0.337
-8.71957	0.432	0.327	0.337
-8.71157	0.432	0.327	0.337
-8.70357	0.432	0.327	0.337
-8.69557	0.432	0.327	0.337
-8.68757	0.432	0.327	0.337
-8.67957	0.432	0.327	0.337
-8.67157	0.432	0.327	0.337
-8.66357	0.432	0.327	0.337
-8.65557	0.432	0.327	0.337
-8.64756	0.432	0.327	0.337
-8.63956	0.432	0.327	0.337
-8.63156	0.432	0.327	0.337
-8.62356	0.432	0.328	0.337
-8.61556	0.432	0.328	0.337
-8.60756	0.432	0.328	0.337
-8.59956	0.432	0.328	0.337
-8.59156	0.432	0.328	0.337
-8.58356	0.432	0.328	0.337
-8.57556	0.433	0.328	0.337
-8.56756	0.433	0.328	0.337
-8.55956	0.433	0.328	0.337
-8.55156	0.433	0.328	0.337
-8.54355	0.433	0.328	0.337
-8.53555	0.433	0.328	0.337
-8.52755	0.433	0.328	0.337
-8.51955	0.433	0.328	0.337
-8.51155	0.433	0.328	0.337
-8.50355	0.433	0.328	0.337
-8.49555	0.433	0.328	0.337
-8.48755	0.433	0.328	0.337
-8.47955	0.433	0.328	0.337
-8.47155	0.433	0.328	0.337
-8.46355	0.433	0.328	0.337
-8.45555	0.433	0.328	0.337
-8.44754	0.433	0.328	0.337
-8.43954	0.433	0.328	0.337
-8.43154	0.433	0.328	0.337
-8.42354	0.433	0.328	0.337
-8.41554	0.433	0.328	0.337
-8.40754	0.433	0.328	0.337
-8.39954	0.433	0.328	0.337
-8.39154	0.433	0.328	0.337
-8.38354	0.433	0.328	0.337
-8.37554	0.433	0.328	0.337
-8.36754	0.433	0.328	0.337
-8.35954	0.433	0.329	0.337
-8.35154	0.433	0.329	0.337
-8.34353	0.433	0.329	0.337
-8.33553	0.433	0.329	0.337
-8.32753	0.433	0.329	0.337
-8.31953	0.433	0.329	0.337
-8.31153	0.433	0.329	0.337
-8.30353	0.433	0.329	0.337
-8.29553	0.433	0.329	0.337
-8.28753	0.433	0.329	0.337
-8.27953	0.433	0.329	0.337
-8.27153	0.433	0.329	0.337
-8.26353	0.433	0.329	0.337
-8.25553	0.433	0.329	0.337
-8.24752	0.433	0.329	0.337
-8.23952	0.433	0.329	0.337
-8.23152	0.433	0.329	0.337
-8.22352	0.433	0.329	0.337
-8.21552	0.433	0.329	0.337
-8.20752	0.433	0.329	0.337
-8.19952	0.433	0.329	0.337
-8.19152	0.433	0.329	0.337
-8.18352	0.433	0.329	0.337
-8.17552	0.433	0.329	0.337
-8.16752	0.433	0.329	0.337
-8.15952	0.433	0.329	0.337
-8.15152	0.433	0.329	0.337
-8.14351	0.433	0.329	0.337
-8.13551	0.433	0.329	0.337
-8.12751	0.433	0.329	0.337
-8.11951	0.433	0.329	0.337
-8.11151	0.433	0.329	0.337
-8.10351	0.433	0.33	0.337
-8.09551	0.433	0.33	0.337
-8.08751	0.433	0.33	0.337
-8.07951	0.433	0.33	0.337
-8.07151	0.433	0.33	0.337
-8.06351	0.433	0.33	0.337
-8.05551	0.433	0.33	0.337
-8.0475	0.433	0.33	0.337
-8.0395	0.433	0.33	0.337
-8.0315	0.433	0.33	0.337
-8.0235	0.433	0.33	0.337
-8.0155	0.433	0.33	0.337
-8.0075	0.433	0.33	0.337
-7.9995	0.433	0.33	0.337
-7.9915	0.433	0.33	0.337
-7.9835	0.433	0.33	0.337
-7.9755	0.434	0.33	0.337
-7.9675	0.434	0.33	0.337
-7.9595	0.434	0.33	0.337
-7.9515	0.434	0.33	0.337
-7.94349	0.434	0.33	0.337
-7.93549	0.434	0.33	0.337
-7.92749	0.434	0.33	0.337
-7.91949	0.434	0.33	0.337
-7.91149	0.434	0.33	0.337
-7.90349	0.434	0.33	0.337
-7.89549	0.434	0.33	0.337
-7.88749	0.434	0.33	0.338
-7.87949	0.434	0.33	0.338
-7.87149	0.434	0.33	0.338
-7.86349	0.434	0.33	0.338
-7.85549	0.434	0.33	0.338
-7.84748	0.434	0.331	0.338
-7.83948	0.434	0.331	0.338
-7.83148	0.434	0.331	0.338
-7.82348	0.434	0.331	0.338
-7.81548	0.434	0.331	0.338
-7.80748	0.434	0.331	0.338
-7.79948	0.434	0.331	0.338
-7.79148	0.434	0.331	0.338
-7.78348	0.434	0.331	0.338
-7.77548	0.434	0.331	0.338
-7.76748	0.434	0.331	0.338
-7.75948	0.434	0.331	0.338
-7.75148	0.434	0.331	0.338
-7.74347	0.434	0.331	0.338
-7.73547	0.434	0.331	0.338
-7.72747	0.434	0.331	0.338
-7.71947	0.434	0.331	0.338
-7.71147	0.434	0.331	0.338
-7.70347	0.434	0.331	0.338
-7.69547	0.434	0.331	0.338
-7.68747	0.434	0.331	0.338
-7.67947	0.434	0.331	0.338
-7.67147	0.434	0.331	0.338
-7.66347	0.434	0.331	0.338
-7.65547	0.434	0.331	0.338
-7.64746	0.434	0.331	0.338
-7.63946	0.434	0.331	0.338
-7.63146	0.434	0.331	0.338
-7.62346	0.434	0.331	0.338
-7.61546	0.434	0.331	0.338
-7.60746	0.434	0.331	0.338
-7.59946	0.434	0.331	0.338
-7.59146	0.434	0.332	0.338
-7.58346	0.434	0.332	0.338
-7.57546	0.434	0.332	0.338
-7.56746	0.434	0.332	0.338
-7.55946	0.434	0.332	0.338
-7.55146	0.434	0.332	0.338
-7.54345	0.434	0.332	0.338
-7.53545	0.434	0.332	0.338
-7.52745	0.434	0.332	0.338
-7.51945	0.434	0.332	0.338
-7.51145	0.434	0.332	0.338
-7.50345	0.434	0.332	0.338
-7.49545	0.434	0.332	0.338
-7.48745	0.434	0.332	0.338
-7.47945	0.434	0.332	0.338
-7.47145	0.434	0.332	0.338
-7.46345	0.434	0.332	0.338
-7.45545	0.434	0.332	0.338
-7.44744	0.434	0.332	0.338
-7.43944	0.434	0.332	0.338
-7.43144	0.434	0.332	0.338
-7.42344	0.434	0.332	0.338
-7.41544	0.434	0.332	0.338
-7.40744	0.434	0.332	0.338
-7.39944	0.434	0.332	0.338
-7.39144	0.434	0.332	0.338
-7.38344	0.434	0.332	0.338
-7.37544	0.434	0.332	0.338
-7.36744	0.434	0.332	0.338
-7.35944	0.434	0.332	0.338
-7.35144	0.434	0.332	0.338
-7.34343	0.434	0.333	0.338
-7.33543	0.434	0.333	0.338
-7.32743	0.434	0.333	0.338
-7.31943	0.434	0.333	0.338
-7.31143	0.434	0.333	0.338
-7.30343	0.434	0.333	0.338
-7.29543	0.435	0.333	0.338
-7.28743	0.435	0.333	0.338
-7.27943	0.435	0.333	0.338
-7.27143	0.435	0.333	0.338
-7.26343	0.435	0.333	0.338
-7.25543	0.435	0.333	0.338
-7.24742	0.435	0.333	0.338
-7.23942	0.435	0.333	0.338
-7.23142	0.435	0.333	0.338
-7.22342	0.435	0.333	0.338
-7.21542	0.435	0.333	0.338
-7.20742	0.435	0.333	0.338
-7.19942	0.435	0.333	0.338
-7.19142	0.435	0.333	0.338
-7.18342	0.435	0.333	0.338
-7.17542	0.435	0.333	0.338
-7.16742	0.435	0.333	0.338
-7.15942	0.435	0.333	0.338
-7.15142	0.435	0.333	0.338
-7.14341	0.435	0.333	0.338
-7.13541	0.435	0.333	0.338
-7.12741	0.435	0.333	0.338
-7.11941	0.435	0.333	0.338
-7.11141	0.435	0.333	0.338
-7.10341	0.435	0.333	0.338
-7.09541	0.435	0.334	0.338
-7.08741	0.435	0.334	0.338
-7.07941	0.435	0.334	0.338
-7.07141	0.435	0.334	0.338
-7.06341	0.435	0.334	0.338
-7.05541	0.435	0.334	0.338
-7.0474	0.435	0.334	0.338
-7.0394	0.435	0.334	0.338
-7.0314	0.435	0.334	0.338
-7.0234	0.435	0.334	0.338
-7.0154	0.435	0.334	0.338
-7.0074	0.435	0.334	0.338
-6.9994	0.435	0.334	0.338
-6.9914	0.435	0.334	0.338
-6.9834	0.435	0.334	0.338
-6.9754	0.435	0.334	0.338
-6.9674	0.435	0.334	0.338
-6.9594	0.435	0.334	0.338
-6.9514	0.435	0.334	0.338
-6.94339	0.435	0.334	0.338
-6.93539	0.435	0.334	0.338
-6.92739	0.435	0.334	0.338
-6.91939	0.435	0.334	0.338
-6.91139	0.435	0.334	0.338
-6.90339	0.435	0.334	0.338
-6.89539	0.435	0.334	0.339
-6.88739	0.435	0.334	0.339
-6.87939	0.435	0.334	0.339
-6.87139	0.435	0.334	0.339
-6.86339	0.435	0.334	0.339
-6.85539	0.435	0.334	0.339
-6.84738	0.435	0.335	0.339
-6.83938	0.435	0.335	0.339
-6.83138	0.435	0.335	0.339
-6.82338	0.435	0.335	0.339
-6.81538	0.435	0.335	0.339
-6.80738	0.435	0.335	0.339
-6.79938	0.435	0.335	0.339
-6.79138	0.435	0.335	0.339
-6.78338	0.435	0.335	0.339
-6.77538	0.435	0.335	0.339
-6.76738	0.435	0.335	0.339
-6.75938	0.435	0.335	0.339
-6.75138	0.435	0.335	0.339
-6.74337	0.435	0.335	0.339
-6.73537	0.435	0.335	0.339
-6.72737	0.435	0.335	0.339
-6.71937	0.435	0.335	0.339
-6.71137	0.435	0.335	0.339
-6.70337	0.435	0.335	0.339
-6.69537	0.435	0.335	0.339
-6.68737	0.435	0.335	0.339
-6.67937	0.435	0.335	0.339
-6.67137	0.435	0.335	0.339
-6.66337	0.435	0.335	0.339
-6.65537	0.435	0.335	0.339
-6.64736	0.435	0.335	0.339
-6.63936	0.435	0.335	0.339
-6.63136	0.435	0.335	0.339
-6.62336	0.435	0.335	0.339
-6.61536	0.435	0.335	0.339
-6.60736	0.435	0.335	0.339
-6.59936	0.435	0.336	0.339
-6.59136	0.435	0.336	0.339
-6.58336	0.435	0.336	0.339
-6.57536	0.435	0.336	0.339
-6.56736	0.435	0.336	0.339
-6.55936	0.435	0.336	0.339
-6.55136	0.435	0.336	0.339
-6.54335	0.436	0.336	0.339
-6.53535	0.436	0.336	0.339
-6.52735	0.436	0.336	0.339
-6.51935	0.436	0.336	0.339
-6.51135	0.436	0.336	0.339
-6.50335	0.436	0.336	0.339
-6.49535	0.436	0.336	0.339
-6.48735	0.436	0.336	0.339
-6.47935	0.436	0.336	0.339
-6.47135	0.436	0.336	0.339
-6.46335	0.436	0.336	0.339
-6.45535	0.436	0.336	0.339
-6.44734	0.436	0.336	0.339
-6.43934	0.436	0.336	0.339
-6.43134	0.436	0.336	0.339
-6.42334	0.436	0.336	0.339
-6.41534	0.436	0.336	0.339
-6.40734	0.436	0.336	0.339
-6.39934	0.436	0.336	0.339
-6.39134	0.436	0.336	0.339
-6.38334	0.436	0.336	0.339
-6.37534	0.436	0.336	0.339
-6.36734	0.436	0.336	0.339
-6.35934	0.436	0.337	0.339
-6.35134	0.436	0.337	0.339
-6.34333	0.436	0.337	0.339
-6.33533	0.436	0.337	0.339
-6.32733	0.436	0.337	0.339
-6.31933	0.436	0.337	0.339
-6.31133	0.436	0.337	0.339
-6.30333	0.436	0.337	0.339
-6.29533	0.436	0.337	0.339
-6.28733	0.436	0.337	0.339
-6.27933	0.436	0.337	0.339
-6.27133	0.436	0.337	0.339
-6.26333	0.436	0.337	0.339
-6.25533	0.436	0.337	0.339
-6.24732	0.436	0.337	0.339
-6.23932	0.436	0.337	0.339
-6.23132	0.436	0.337	0.339
-6.22332	0.436	0.337	0.339
-6.21532	0.436	0.337	0.339
-6.20732	0.436	0.337	0.339
-6.19932	0.436	0.337	0.339
-6.19132	0.436	0.337	0.339
-6.18332	0.436	0.337	0.339
-6.17532	0.436	0.337	0.339
-6.16732	0.436	0.337	0.339
-6.15932	0.436	0.337	0.339
-6.15132	0.436	0.337	0.339
-6.14331	0.436	0.337	0.339
-6.13531	0.436	0.337	0.339
-6.12731	0.436	0.337	0.339
-6.11931	0.436	0.337	0.339
-6.11131	0.436	0.338	0.339
-6.10331	0.436	0.338	0.339
-6.09531	0.436	0.338	0.339
-6.08731	0.436	0.338	0.339
-6.07931	0.436	0.338	0.339
-6.07131	0.436	0.338	0.339
-6.06331	0.436	0.338	0.339
-6.05531	0.436	0.338	0.339
-6.0473	0.436	0.338	0.339
-6.0393	0.436	0.338	0.339
-6.0313	0.436	0.338	0.339
-6.0233	0.436	0.338	0.339
-6.0153	0.436	0.338	0.339
-6.0073	0.436	0.338	0.339
-5.9993	0.436	0.338	0.339
-5.9913	0.436	0.338	0.339
-5.9833	0.436	0.338	0.339
-5.9753	0.436	0.338	0.339
-5.9673	0.436	0.338	0.339
-5.9593	0.436	0.338	0.339
-5.9513	0.436	0.338	0.339
-5.94329	0.436	0.338	0.339
-5.93529	0.436	0.338	0.339
-5.92729	0.436	0.338	0.339
-5.91929	0.436	0.338	0.339
-5.91129	0.436	0.338	0.339
-5.90329	0.436	0.338	0.339
-5.89529	0.436	0.338	0.339
-5.88729	0.436	0.338	0.339
-5.87929	0.436	0.338	0.339
-5.87129	0.436	0.339	0.34
-5.86329	0.436	0.339	0.34
-5.85529	0.436	0.339	0.34
-5.84728	0.436	0.339	0.34
-5.83928	0.436	0.339	0.34
-5.83128	0.436	0.339	0.34
-5.82328	0.436	0.339	0.34
-5.81528	0.436	0.339	0.34
-5.80728	0.436	0.339	0.34
-5.79928	0.436	0.339	0.34
-5.79128	0.436	0.339	0.34
-5.78328	0.436	0.339	0.34
-5.77528	0.436	0.339	0.34
-5.76728	0.436	0.339	0.34
-5.75928	0.436	0.339	0.34
-5.75128	0.436	0.339	0.34
-5.74327	0.436	0.339	0.34
-5.73527	0.436	0.339	0.34
-5.72727	0.437	0.339	0.34
-5.71927	0.437	0.339	0.34
-5.71127	0.437	0.339	0.34
-5.70327	0.437	0.339	0.34
-5.69527	0.437	0.339	0.34
-5.68727	0.437	0.339	0.34
-5.67927	0.437	0.339	0.34
-5.67127	0.437	0.339	0.34
-5.66327	0.437	0.339	0.34
-5.65527	0.437	0.339	0.34
-5.64726	0.437	0.339	0.34
-5.63926	0.437	0.339	0.34
-5.63126	0.437	0.34	0.34
-5.62326	0.437	0.34	0.34
-5.61526	0.437	0.34	0.34
-5.60726	0.437	0.34	0.34
-5.59926	0.437	0.34	0.34
-5.59126	0.437	0.34	0.34
-5.58326	0.437	0.34	0.34
-5.57526	0.437	0.34	0.34
-5.56726	0.437	0.34	0.34
-5.55926	0.437	0.34	0.34
-5.55126	0.437	0.34	0.34
-5.54325	0.437	0.34	0.34
-5.53525	0.437	0.34	0.34
-5.52725	0.437	0.34	0.34
-5.51925	0.437	0.34	0.34
-5.51125	0.437	0.34	0.34
-5.50325	0.437	0.34	0.34
-5.49525	0.437	0.34	0.34
-5.48725	0.437	0.34	0.34
-5.47925	0.437	0.34	0.34
-5.47125	0.437	0.34	0.34
-5.46325	0.437	0.34	0.34
-5.45525	0.437	0.34	0.34
-5.44724	0.437	0.34	0.34
-5.43924	0.437	0.34	0.34
-5.43124	0.437	0.34	0.34
-5.42324	0.437	0.34	0.34
-5.41524	0.437	0.34	0.34
-5.40724	0.437	0.34	0.34
-5.39924	0.437	0.34	0.34
-5.39124	0.437	0.341	0.34
-5.38324	0.437	0.341	0.34
-5.37524	0.437	0.341	0.34
-5.36724	0.437	0.341	0.34
-5.35924	0.437	0.341	0.34
-5.35124	0.437	0.341	0.34
-5.34323	0.437	0.341	0.34
-5.33523	0.437	0.341	0.34
-5.32723	0.437	0.341	0.34
-5.31923	0.437	0.341	0.34
-5.31123	0.437	0.341	0.34
-5.30323	0.437	0.341	0.34
-5.29523	0.437	0.341	0.34
-5.28723	0.437	0.341	0.34
-5.27923	0.437	0.341	0.34
-5.27123	0.437	0.341	0.34
-5.26323	0.437	0.341	0.34
-5.25523	0.437	0.341	0.34
-5.24722	0.437	0.341	0.34
-5.23922	0.437	0.341	0.34
-5.23122	0.437	0.341	0.34
-5.22322	0.437	0.341	0.34
-5.21522	0.437	0.341	0.34
-5.20722	0.437	0.341	0.34
-5.19922	0.437	0.341	0.34
-5.19122	0.437	0.341	0.34
-5.18322	0.437	0.341	0.34
-5.17522	0.437	0.341	0.34
-5.16722	0.437	0.341	0.34
-5.15922	0.437	0.341	0.34
-5.15122	0.437	0.342	0.34
-5.14321	0.437	0.342	0.34
-5.13521	0.437	0.342	0.34
-5.12721	0.437	0.342	0.34
-5.11921	0.437	0.342	0.34
-5.11121	0.437	0.342	0.34
-5.10321	0.437	0.342	0.34
-5.09521	0.437	0.342	0.34
-5.08721	0.437	0.342	0.34
-5.07921	0.437	0.342	0.34
-5.07121	0.437	0.342	0.34
-5.06321	0.437	0.342	0.34
-5.05521	0.437	0.342	0.34
-5.0472	0.437	0.342	0.34
-5.0392	0.437	0.342	0.34
-5.0312	0.437	0.342	0.34
-5.0232	0.437	0.342	0.34
-5.0152	0.437	0.342	0.34
-5.0072	0.437	0.342	0.34
-4.9992	0.437	0.342	0.34
-4.9912	0.437	0.342	0.34
-4.9832	0.437	0.342	0.34
-4.9752	0.437	0.342	0.34
-4.9672	0.437	0.342	0.34
-4.9592	0.437	0.342	0.34
-4.9512	0.437	0.342	0.34
-4.94319	0.437	0.342	0.34
-4.93519	0.437	0.342	0.34
-4.92719	0.437	0.342	0.34
-4.91919	0.437	0.343	0.34
-4.91119	0.437	0.343	0.34
-4.90319	0.437	0.343	0.34
-4.89519	0.437	0.343	0.34
-4.88719	0.437	0.343	0.34
-4.87919	0.437	0.343	0.34
-4.87119	0.437	0.343	0.34
-4.86319	0.438	0.343	0.34
-4.85519	0.438	0.343	0.34
-4.84718	0.438	0.343	0.34
-4.83918	0.438	0.343	0.34
-4.83118	0.438	0.343	0.34
-4.82318	0.438	0.343	0.34
-4.81518	0.438	0.343	0.34
-4.80718	0.438	0.343	0.341
-4.79918	0.438	0.343	0.341
-4.79118	0.438	0.343	0.341
-4.78318	0.438	0.343	0.341
-4.77518	0.438	0.343	0.341
-4.76718	0.438	0.343	0.341
-4.75918	0.438	0.343	0.341
-4.75118	0.438	0.343	0.341
-4.74317	0.438	0.343	0.341
-4.73517	0.438	0.343	0.341
-4.72717	0.438	0.343	0.341
-4.71917	0.438	0.343	0.341
-4.71117	0.438	0.343	0.341
-4.70317	0.438	0.343	0.341
-4.69517	0.438	0.343	0.341
-4.68717	0.438	0.343	0.341
-4.67917	0.438	0.344	0.341
-4.67117	0.438	0.344	0.341
-4.66317	0.438	0.344	0.341
-4.65517	0.438	0.344	0.341
-4.64716	0.438	0.344	0.341
-4.63916	0.438	0.344	0.341
-4.63116	0.438	0.344	0.341
-4.62316	0.438	0.344	0.341
-4.61516	0.438	0.344	0.341
-4.60716	0.438	0.344	0.341
-4.59916	0.438	0.344	0.341
-4.59116	0.438	0.344	0.341
-4.58316	0.438	0.344	0.341
-4.57516	0.438	0.344	0.341
-4.56716	0.438	0.344	0.341
-4.55916	0.438	0.344	0.341
-4.55116	0.438	0.344	0.341
-4.54315	0.438	0.344	0.341
-4.53515	0.438	0.344	0.341
-4.52715	0.438	0.344	0.341
-4.51915	0.438	0.344	0.341
-4.51115	0.438	0.344	0.341
-4.50315	0.438	0.344	0.341
-4.49515	0.438	0.344	0.341
-4.48715	0.438	0.344	0.341
-4.47915	0.438	0.344	0.341
-4.47115	0.438	0.344	0.341
-4.46315	0.438	0.344	0.341
-4.45515	0.438	0.344	0.341
-4.44714	0.438	0.344	0.341
-4.43914	0.438	0.345	0.341
-4.43114	0.438	0.345	0.341
-4.42314	0.438	0.345	0.341
-4.41514	0.438	0.345	0.341
-4.40714	0.438	0.345	0.341
-4.39914	0.438	0.345	0.341
-4.39114	0.438	0.345	0.341
-4.38314	0.438	0.345	0.341
-4.37514	0.438	0.345	0.341
-4.36714	0.438	0.345	0.341
-4.35914	0.438	0.345	0.341
-4.35114	0.438	0.345	0.341
-4.34313	0.438	0.345	0.341
-4.33513	0.438	0.345	0.341
-4.32713	0.438	0.345	0.341
-4.31913	0.438	0.345	0.341
-4.31113	0.438	0.345	0.341
-4.30313	0.438	0.345	0.341
-4.29513	0.438	0.345	0.341
-4.28713	0.438	0.345	0.341
-4.27913	0.438	0.345	0.341
-4.27113	0.438	0.345	0.341
-4.26313	0.438	0.345	0.341
-4.25513	0.438	0.345	0.341
-4.24712	0.438	0.345	0.341
-4.23912	0.438	0.345	0.341
-4.23112	0.438	0.345	0.341
-4.22312	0.438	0.345	0.341
-4.21512	0.438	0.345	0.341
-4.20712	0.438	0.346	0.341
-4.19912	0.438	0.346	0.341
-4.19112	0.438	0.346	0.341
-4.18312	0.438	0.346	0.341
-4.17512	0.438	0.346	0.341
-4.16712	0.438	0.346	0.341
-4.15912	0.438	0.346	0.341
-4.15112	0.438	0.346	0.341
-4.14311	0.438	0.346	0.341
-4.13511	0.438	0.346	0.341
-4.12711	0.438	0.346	0.341
-4.11911	0.438	0.346	0.341
-4.11111	0.438	0.346	0.341
-4.10311	0.438	0.346	0.341
-4.09511	0.438	0.346	0.341
-4.08711	0.438	0.346	0.341
-4.07911	0.438	0.346	0.341
-4.07111	0.438	0.346	0.341
-4.06311	0.438	0.346	0.341
-4.05511	0.438	0.346	0.341
-4.0471	0.438	0.346	0.341
-4.0391	0.438	0.346	0.341
-4.0311	0.438	0.346	0.341
-4.0231	0.438	0.346	0.341
-4.0151	0.438	0.346	0.341
-4.0071	0.438	0.346	0.341
-3.9991	0.438	0.346	0.341
-3.9911	0.438	0.346	0.341
-3.9831	0.438	0.346	0.341
-3.9751	0.438	0.347	0.341
-3.9671	0.439	0.347	0.341
-3.9591	0.439	0.347	0.341
-3.9511	0.439	0.347	0.341
-3.94309	0.439	0.347	0.341
-3.93509	0.439	0.347	0.341
-3.92709	0.439	0.347	0.341
-3.91909	0.439	0.347	0.341
-3.91109	0.439	0.347	0.341
-3.90309	0.439	0.347	0.341
-3.89509	0.439	0.347	0.341
-3.88709	0.439	0.347	0.341
-3.87909	0.439	0.347	0.341
-3.87109	0.439	0.347	0.341
-3.86309	0.439	0.347	0.341
-3.85509	0.439	0.347	0.341
-3.84708	0.439	0.347	0.341
-3.83908	0.439	0.347	0.341
-3.83108	0.439	0.347	0.341
-3.82308	0.439	0.347	0.341
-3.81508	0.439	0.347	0.341
-3.80708	0.439	0.347	0.341
-3.79908	0.439	0.347	0.341
-3.79108	0.439	0.347	0.341
-3.78308	0.439	0.347	0.341
-3.77508	0.439	0.347	0.341
-3.76708	0.439	0.347	0.341
-3.75908	0.439	0.347	0.341
-3.75108	0.439	0.347	0.341
-3.74307	0.439	0.347	0.341
-3.73507	0.439	0.348	0.341
-3.72707	0.439	0.348	0.342
-3.71907	0.439	0.348	0.342
-3.71107	0.439	0.348	0.342
-3.70307	0.439	0.348	0.342
-3.69507	0.439	0.348	0.342
-3.68707	0.439	0.348	0.342
-3.67907	0.439	0.348	0.342
-3.67107	0.439	0.348	0.342
-3.66307	0.439	0.348	0.342
-3.65507	0.439	0.348	0.342
-3.64706	0.439	0.348	0.342
-3.63906	0.439	0.348	0.342
-3.63106	0.439	0.348	0.342
-3.62306	0.439	0.348	0.342
-3.61506	0.439	0.348	0.342
-3.60706	0.439	0.348	0.342
-3.59906	0.439	0.348	0.342
-3.59106	0.439	0.348	0.342
-3.58306	0.439	0.348	0.342
-3.57506	0.439	0.348	0.342
-3.56706	0.439	0.348	0.342
-3.55906	0.439	0.348	0.342
-3.55106	0.439	0.348	0.342
-3.54305	0.439	0.348	0.342
-3.53505	0.439	0.348	0.342
-3.52705	0.439	0.348	0.342
-3.51905	0.439	0.348	0.342
-3.51105	0.439	0.348	0.342
-3.50305	0.439	0.349	0.342
-3.49505	0.439	0.349	0.342
-3.48705	0.439	0.349	0.342
-3.47905	0.439	0.349	0.342
-3.47105	0.439	0.349	0.342
-3.46305	0.439	0.349	0.342
-3.45505	0.439	0.349	0.342
-3.44704	0.439	0.349	0.342
-3.43904	0.439	0.349	0.342
-3.43104	0.439	0.349	0.342
-3.42304	0.439	0.349	0.342
-3.41504	0.439	0.349	0.342
-3.40704	0.439	0.349	0.342
-3.39904	0.439	0.349	0.342
-3.39104	0.439	0.349	0.342
-3.38304	0.439	0.349	0.342
-3.37504	0.439	0.349	0.342
-3.36704	0.439	0.349	0.342
-3.35904	0.439	0.349	0.342
-3.35104	0.439	0.349	0.342
-3.34303	0.439	0.349	0.342
-3.33503	0.439	0.349	0.342
-3.32703	0.439	0.349	0.342
-3.31903	0.439	0.349	0.342
-3.31103	0.439	0.349	0.342
-3.30303	0.439	0.349	0.342
-3.29503	0.439	0.349	0.342
-3.28703	0.439	0.349	0.342
-3.27903	0.439	0.349	0.342
-3.27103	0.439	0.35	0.342
-3.26303	0.439	0.35	0.342
-3.25503	0.439	0.35	0.342
-3.24702	0.439	0.35	0.342
-3.23902	0.439	0.35	0.342
-3.23102	0.439	0.35	0.342
-3.22302	0.439	0.35	0.342
-3.21502	0.439	0.35	0.342
-3.20702	0.439	0.35	0.342
-3.19902	0.439	0.35	0.342
-3.19102	0.439	0.35	0.342
-3.18302	0.439	0.35	0.342
-3.17502	0.439	0.35	0.342
-3.16702	0.439	0.35	0.342
-3.15902	0.439	0.35	0.342
-3.15102	0.439	0.35	0.342
-3.14301	0.439	0.35	0.342
-3.13501	0.439	0.35	0.342
-3.12701	0.439	0.35	0.342
-3.11901	0.439	0.35	0.342
-3.11101	0.439	0.35	0.342
-3.10301	0.439	0.35	0.342
-3.09501	0.439	0.35	0.342
-3.08701	0.439	0.35	0.342
-3.07901	0.439	0.35	0.342
-3.07101	0.439	0.35	0.342
-3.06301	0.439	0.35	0.342
-3.05501	0.439	0.35	0.342
-3.047	0.439	0.35	0.342
-3.039	0.44	0.35	0.342
-3.031	0.44	0.351	0.342
-3.023	0.44	0.351	0.342
-3.015	0.44	0.351	0.342
-3.007	0.44	0.351	0.342
-2.999	0.44	0.351	0.342
-2.991	0.44	0.351	0.342
-2.983	0.44	0.351	0.342
-2.975	0.44	0.351	0.342
-2.967	0.44	0.351	0.342
-2.959	0.44	0.351	0.342
-2.951	0.44	0.351	0.342
-2.94299	0.44	0.351	0.342
-2.93499	0.44	0.351	0.342
-2.92699	0.44	0.351	0.342
-2.91899	0.44	0.351	0.342
-2.91099	0.44	0.351	0.342
-2.90299	0.44	0.351	0.342
-2.89499	0.44	0.351	0.342
-2.88699	0.44	0.351	0.342
-2.87899	0.44	0.351	0.342
-2.87099	0.44	0.351	0.342
-2.86299	0.44	0.351	0.342
-2.85499	0.44	0.351	0.342
-2.84698	0.44	0.351	0.342
-2.83898	0.44	0.351	0.342
-2.83098	0.44	0.351	0.342
-2.82298	0.44	0.351	0.342
-2.81498	0.44	0.351	0.342
-2.80698	0.44	0.351	0.342
-2.79898	0.44	0.352	0.342
-2.79098	0.44	0.352	0.342
-2.78298	0.44	0.352	0.342
-2.77498	0.44	0.352	0.342
-2.76698	0.44	0.352	0.342
-2.75898	0.44	0.352	0.342
-2.75098	0.44	0.352	0.342
-2.74297	0.44	0.352	0.342
-2.73497	0.44	0.352	0.342
-2.72697	0.44	0.352	0.342
-2.71897	0.44	0.352	0.342
-2.71097	0.44	0.352	0.342
-2.70297	0.44	0.352	0.342
-2.69497	0.44	0.352	0.342
-2.68697	0.44	0.352	0.342
-2.67897	0.44	0.352	0.342
-2.67097	0.44	0.352	0.342
-2.66297	0.44	0.352	0.342
-2.65497	0.44	0.352	0.342
-2.64696	0.44	0.352	0.342
-2.63896	0.44	0.352	0.342
-2.63096	0.44	0.352	0.342
-2.62296	0.44	0.352	0.342
-2.61496	0.44	0.352	0.343
-2.60696	0.44	0.352	0.343
-2.59896	0.44	0.352	0.343
-2.59096	0.44	0.352	0.343
-2.58296	0.44	0.352	0.343
-2.57496	0.44	0.352	0.343
-2.56696	0.44	0.353	0.343
-2.55896	0.44	0.353	0.343
-2.55096	0.44	0.353	0.343
-2.54295	0.44	0.353	0.343
-2.53495	0.44	0.353	0.343
-2.52695	0.44	0.353	0.343
-2.51895	0.44	0.353	0.343
-2.51095	0.44	0.353	0.343
-2.50295	0.44	0.353	0.343
-2.49495	0.44	0.353	0.343
-2.48695	0.44	0.353	0.343
-2.47895	0.44	0.353	0.343
-2.47095	0.44	0.353	0.343
-2.46295	0.44	0.353	0.343
-2.45495	0.44	0.353	0.343
-2.44694	0.44	0.353	0.343
-2.43894	0.44	0.353	0.343
-2.43094	0.44	0.353	0.343
-2.42294	0.44	0.353	0.343
-2.41494	0.44	0.353	0.343
-2.40694	0.44	0.353	0.343
-2.39894	0.44	0.353	0.343
-2.39094	0.44	0.353	0.343
-2.38294	0.44	0.353	0.343
-2.37494	0.44	0.353	0.343
-2.36694	0.44	0.353	0.343
-2.35894	0.44	0.353	0.343
-2.35094	0.44	0.353	0.343
-2.34293	0.44	0.353	0.343
-2.33493	0.44	0.354	0.343
-2.32693	0.44	0.354	0.343
-2.31893	0.44	0.354	0.343
-2.31093	0.44	0.354	0.343
-2.30293	0.44	0.354	0.343
-2.29493	0.44	0.354	0.343
-2.28693	0.44	0.354	0.343
-2.27893	0.44	0.354	0.343
-2.27093	0.44	0.354	0.343
-2.26293	0.44	0.354	0.343
-2.25493	0.44	0.354	0.343
-2.24692	0.44	0.354	0.343
-2.23892	0.44	0.354	0.343
-2.23092	0.44	0.354	0.343
-2.22292	0.44	0.354	0.343
-2.21492	0.44	0.354	0.343
-2.20692	0.44	0.354	0.343
-2.19892	0.44	0.354	0.343
-2.19092	0.44	0.354	0.343
-2.18292	0.44	0.354	0.343
-2.17492	0.44	0.354	0.343
-2.16692	0.44	0.354	0.343
-2.15892	0.44	0.354	0.343
-2.15092	0.44	0.354	0.343
-2.14291	0.44	0.354	0.343
-2.13491	0.44	0.354	0.343
-2.12691	0.44	0.354	0.343
-2.11891	0.44	0.354	0.343
-2.11091	0.44	0.354	0.343
-2.10291	0.441	0.354	0.343
-2.09491	0.441	0.355	0.343
-2.08691	0.441	0.355	0.343
-2.07891	0.441	0.355	0.343
-2.07091	0.441	0.355	0.343
-2.06291	0.441	0.355	0.343
-2.05491	0.441	0.355	0.343
-2.0469	0.441	0.355	0.343
-2.0389	0.441	0.355	0.343
-2.0309	0.441	0.355	0.343
-2.0229	0.441	0.355	0.343
-2.0149	0.441	0.355	0.343
-2.0069	0.441	0.355	0.343
-1.9989	0.441	0.355	0.343
-1.9909	0.441	0.355	0.343
-1.9829	0.441	0.355	0.343
-1.9749	0.441	0.355	0.343
-1.9669	0.441	0.355	0.343
-1.9589	0.441	0.355	0.343
-1.9509	0.441	0.355	0.343
-1.94289	0.441	0.355	0.343
-1.93489	0.441	0.355	0.343
-1.92689	0.441	0.355	0.343
-1.91889	0.441	0.355	0.343
-1.91089	0.441	0.355	0.343
-1.90289	0.441	0.355	0.343
-1.89489	0.441	0.355	0.343
-1.88689	0.441	0.355	0.343
-1.87889	0.441	0.355	0.343
-1.87089	0.441	0.355	0.343
-1.86289	0.441	0.356	0.343
-1.85489	0.441	0.356	0.343
-1.84688	0.441	0.356	0.343
-1.83888	0.441	0.356	0.343
-1.83088	0.441	0.356	0.343
-1.82288	0.441	0.356	0.343
-1.81488	0.441	0.356	0.343
-1.80688	0.441	0.356	0.343
-1.79888	0.441	0.356	0.343
-1.79088	0.441	0.356	0.343
-1.78288	0.441	0.356	0.343
-1.77488	0.441	0.356	0.343
-1.76688	0.441	0.356	0.343
-1.75888	0.441	0.356	0.343
-1.75088	0.441	0.356	0.343
-1.74287	0.441	0.356	0.343
-1.73487	0.441	0.356	0.343
-1.72687	0.441	0.356	0.343
-1.71887	0.441	0.356	0.343
-1.71087	0.441	0.356	0.343
-1.70287	0.441	0.356	0.343
-1.69487	0.441	0.356	0.343
-1.68687	0.441	0.356	0.343
-1.67887	0.441	0.356	0.343
-1.67087	0.441	0.356	0.343
-1.66287	0.441	0.356	0.343
-1.65487	0.441	0.356	0.343
-1.64686	0.441	0.356	0.343
-1.63886	0.441	0.356	0.343
-1.63086	0.441	0.357	0.343
-1.62286	0.441	0.357	0.343
-1.61486	0.441	0.357	0.343
-1.60686	0.441	0.357	0.343
-1.59886	0.441	0.357	0.343
-1.59086	0.441	0.357	0.343
-1.58286	0.441	0.357	0.343
-1.57486	0.441	0.357	0.343
-1.56686	0.441	0.357	0.343
-1.55886	0.441	0.357	0.343
-1.55086	0.441	0.357	0.343
-1.54285	0.441	0.357	0.343
-1.53485	0.441	0.357	0.343
-1.52685	0.441	0.357	0.343
-1.51885	0.441	0.357	0.343
-1.51085	0.441	0.357	0.343
-1.50285	0.441	0.357	0.343
-1.49485	0.441	0.357	0.344
-1.48685	0.441	0.357	0.344
-1.47885	0.441	0.357	0.344
-1.47085	0.441	0.357	0.344
-1.46285	0.441	0.357	0.344
-1.45485	0.441	0.357	0.344
-1.44684	0.441	0.357	0.344
-1.43884	0.441	0.357	0.344
-1.43084	0.441	0.357	0.344
-1.42284	0.441	0.357	0.344
-1.41484	0.441	0.357	0.344
-1.40684	0.441	0.357	0.344
-1.39884	0.441	0.358	0.344
-1.39084	0.441	0.358	0.344
-1.38284	0.441	0.358	0.344
-1.37484	0.441	0.358	0.344
-1.36684	0.441	0.358	0.344
-1.35884	0.441	0.358	0.344
-1.35084	0.441	0.358	0.344
-1.34283	0.441	0.358	0.344
-1.33483	0.441	0.358	0.344
-1.32683	0.441	0.358	0.344
-1.31883	0.441	0.358	0.344
-1.31083	0.441	0.358	0.344
-1.30283	0.441	0.358	0.344
-1.29483	0.441	0.358	0.344
-1.28683	0.441	0.358	0.344
-1.27883	0.441	0.358	0.344
-1.27083	0.441	0.358	0.344
-1.26283	0.441	0.358	0.344
-1.25483	0.441	0.358	0.344
-1.24682	0.441	0.358	0.344
-1.23882	0.441	0.358	0.344
-1.23082	0.441	0.358	0.344
-1.22282	0.441	0.358	0.344
-1.21482	0.441	0.358	0.344
-1.20682	0.441	0.358	0.344
-1.19882	0.441	0.358	0.344
-1.19082	0.441	0.358	0.344
-1.18282	0.441	0.358	0.344
-1.17482	0.441	0.358	0.344
-1.16682	0.441	0.359	0.344
-1.15882	0.441	0.359	0.344
-1.15082	0.441	0.359	0.344
-1.14281	0.442	0.359	0.344
-1.13481	0.442	0.359	0.344
-1.12681	0.442	0.359	0.344
-1.11881	0.442	0.359	0.344
-1.11081	0.442	0.359	0.344
-1.10281	0.442	0.359	0.344
-1.09481	0.442	0.359	0.344
-1.08681	0.442	0.359	0.344
-1.07881	0.442	0.359	0.344
-1.07081	0.442	0.359	0.344
-1.06281	0.442	0.359	0.344
-1.05481	0.442	0.359	0.344
-1.0468	0.442	0.359	0.344
-1.0388	0.442	0.359	0.344
-1.0308	0.442	0.359	0.344
-1.0228	0.442	0.359	0.344
-1.0148	0.442	0.359	0.344
-1.0068	0.442	0.359	0.344
-0.9988	0.442	0.359	0.344
-0.990799	0.442	0.359	0.344
-0.982798	0.442	0.359	0.344
-0.974797	0.442	0.359	0.344
-0.966797	0.442	0.359	0.344
-0.958796	0.442	0.359	0.344
-0.950795	0.442	0.359	0.344
-0.942794	0.442	0.359	0.344
-0.934793	0.442	0.36	0.344
-0.926793	0.442	0.36	0.344
-0.918792	0.442	0.36	0.344
-0.910791	0.442	0.36	0.344
-0.90279	0.442	0.36	0.344
-0.894789	0.442	0.36	0.344
-0.886789	0.442	0.36	0.344
-0.878788	0.442	0.36	0.344
-0.870787	0.442	0.36	0.344
-0.862786	0.442	0.36	0.344
-0.854785	0.442	0.36	0.344
-0.846785	0.442	0.36	0.344
-0.838784	0.442	0.36	0.344
-0.830783	0.442	0.36	0.344
-0.822782	0.442	0.36	0.344
-0.814781	0.442	0.36	0.344
-0.806781	0.442	0.36	0.344
-0.79878	0.442	0.36	0.344
-0.790779	0.442	0.36	0.344
-0.782778	0.442	0.36	0.344
-0.774777	0.442	0.36	0.344
-0.766777	0.442	0.36	0.344
-0.758776	0.442	0.36	0.344
-0.750775	0.442	0.36	0.344
-0.742774	0.442	0.36	0.344
-0.734773	0.442	0.36	0.344
-0.726773	0.442	0.36	0.344
-0.718772	0.442	0.36	0.344
-0.710771	0.442	0.36	0.344
-0.70277	0.442	0.36	0.344
-0.694769	0.442	0.361	0.344
-0.686769	0.442	0.361	0.344
-0.678768	0.442	0.361	0.344
-0.670767	0.442	0.361	0.344
-0.662766	0.442	0.361	0.344
-0.654765	0.442	0.361	0.344
-0.646765	0.442	0.361	0.344
-0.638764	0.442	0.361	0.344
-0.630763	0.442	0.361	0.344
-0.622762	0.442	0.361	0.344
-0.614761	0.442	0.361	0.344
-0.606761	0.442	0.361	0.344
-0.59876	0.442	0.361	0.344
-0.590759	0.442	0.361	0.344
-0.582758	0.442	0.361	0.344
-0.574757	0.442	0.361	0.344
-0.566757	0.442	0.361	0.344
-0.558756	0.442	0.361	0.344
-0.550755	0.442	0.361	0.344
-0.542754	0.442	0.361	0.344
-0.534753	0.442	0.361	0.344
-0.526753	0.442	0.361	0.344
-0.518752	0.442	0.361	0.344
-0.510751	0.442	0.361	0.344
-0.50275	0.442	0.361	0.344
-0.494749	0.442	0.361	0.344
-0.486749	0.442	0.361	0.344
-0.478748	0.442	0.361	0.344
-0.470747	0.442	0.361	0.344
-0.462746	0.442	0.362	0.344
-0.454745	0.442	0.362	0.344
-0.446745	0.442	0.362	0.344
-0.438744	0.442	0.362	0.344
-0.430743	0.442	0.362	0.344
-0.422742	0.442	0.362	0.344
-0.414741	0.442	0.362	0.344
-0.406741	0.442	0.362	0.344
-0.39874	0.442	0.362	0.344
-0.390739	0.442	0.362	0.344
-0.382738	0.442	0.362	0.344
-0.374737	0.442	0.362	0.344
-0.366737	0.442	0.362	0.344
-0.358736	0.442	0.362	0.345
-0.350735	0.442	0.362	0.345
-0.342734	0.442	0.362	0.345
-0.334733	0.442	0.362	0.345
-0.326733	0.442	0.362	0.345
-0.318732	0.442	0.362	0.345
-0.310731	0.442	0.362	0.345
-0.30273	0.442	0.362	0.345
-0.294729	0.442	0.362	0.345
-0.286729	0.442	0.362	0.345
-0.278728	0.442	0.362	0.345
-0.270727	0.442	0.362	0.345
-0.262726	0.442	0.362	0.345
-0.254725	0.442	0.362	0.345
-0.246725	0.442	0.362	0.345
-0.238724	0.442	0.362	0.345
-0.230723	0.442	0.363	0.345
-0.222722	0.442	0.363	0.345
-0.214721	0.442	0.363	0.345
-0.206721	0.442	0.363	0.345
-0.19872	0.442	0.363	0.345
-0.190719	0.442	0.363	0.345
-0.182718	0.442	0.363	0.345
-0.174717	0.443	0.363	0.345
-0.166717	0.443	0.363	0.345
-0.158716	0.443	0.363	0.345
-0.150715	0.443	0.363	0.345
-0.142714	0.443	0.363	0.345
-0.134713	0.443	0.363	0.345
-0.126713	0.443	0.363	0.345
-0.118712	0.443	0.363	0.345
-0.110711	0.443	0.363	0.345
-0.10271	0.443	0.363	0.345
-0.0947095	0.443	0.363	0.345
-0.0867087	0.443	0.363	0.345
-0.0787079	0.443	0.363	0.345
-0.0707071	0.443	0.363	0.345
-0.0627063	0.443	0.363	0.345
-0.0547055	0.443	0.363	0.345
-0.0467047	0.443	0.363	0.345
-0.0387039	0.443	0.363	0.345
-0.0307031	0.443	0.363	0.345
-0.0227023	0.443	0.363	0.345
-0.0147015	0.443	0.363	0.345
-0.00670067	0.443	0.363	0.345
0.00130013	0.443	0.364	0.345
0.00930093	0.443	0.364	0.345
0.0173017	0.443	0.364	0.345
0.0253025	0.443	0.364	0.345
0.0333033	0.443	0.364	0.345
0.0413041	0.443	0.364	0.345
0.0493049	0.443	0.364	0.345
0.0573057	0.443	0.364	0.345
0.0653065	0.443	0.364	0.345
0.0733073	0.443	0.364	0.345
0.0813081	0.443	0.364	0.345
0.0893089	0.443	0.364	0.345
0.0973097	0.443	0.364	0.345
0.105311	0.443	0.364	0.345
0.113311	0.443	0.364	0.345
0.121312	0.443	0.364	0.345
0.129313	0.443	0.364	0.345
0.137314	0.443	0.364	0.345
0.145315	0.443	0.364	0.345
0.153315	0.443	0.364	0.345
0.161316	0.443	0.364	0.345
0.169317	0.443	0.364	0.345
0.177318	0.443	0.364	0.345
0.185319	0.443	0.364	0.345
0.193319	0.443	0.364	0.345
0.20132	0.443	0.364	0.345
0.209321	0.443	0.364	0.345
0.217322	0.443	0.364	0.345
0.225323	0.443	0.364	0.345
0.233323	0.443	0.365	0.345
0.241324	0.443	0.365	0.345
0.249325	0.443	0.365	0.345
0.257326	0.443	0.365	0.345
0.265327	0.443	0.365	0.345
0.273327	0.443	0.365	0.345
0.281328	0.443	0.365	0.345
0.289329	0.443	0.365	0.345
0.29733	0.443	0.365	0.345
0.305331	0.443	0.365	0.345
0.313331	0.443	0.365	0.345
0.321332	0.443	0.365	0.345
0.329333	0.443	0.365	0.345
0.337334	0.443	0.365	0.345
0.345335	0.443	0.365	0.345
0.353335	0.443	0.365	0.345
0.361336	0.443	0.365	0.345
0.369337	0.443	0.365	0.345
0.377338	0.443	0.365	0.345
0.385339	0.443	0.365	0.345
0.393339	0.443	0.365	0.345
0.40134	0.443	0.365	0.345
0.409341	0.443	0.365	0.345
0.417342	0.443	0.365	0.345
0.425343	0.443	0.365	0.345
0.433343	0.443	0.365	0.345
0.441344	0.443	0.365	0.345
0.449345	0.443	0.365	0.345
0.457346	0.443	0.365	0.345
0.465347	0.443	0.366	0.345
0.473347	0.443	0.366	0.345
0.481348	0.443	0.366	0.345
0.489349	0.443	0.366	0.345
0.49735	0.443	0.366	0.345
0.505351	0.443	0.366	0.345
0.513351	0.443	0.366	0.345
0.521352	0.443	0.366	0.345
0.529353	0.443	0.366	0.345
0.537354	0.443	0.366	0.345
0.545355	0.443	0.366	0.345
0.553355	0.443	0.366	0.345
0.561356	0.443	0.366	0.345
0.569357	0.443	0.366	0.345
0.577358	0.443	0.366	0.345
0.585359	0.443	0.366	0.345
0.593359	0.443	0.366	0.345
0.60136	0.443	0.366	0.345
0.609361	0.443	0.366	0.345
0.617362	0.443	0.366	0.345
0.625363	0.443	0.366	0.345
0.633363	0.443	0.366	0.345
0.641364	0.443	0.366	0.345
0.649365	0.443	0.366	0.345
0.657366	0.443	0.366	0.345
0.665367	0.443	0.366	0.345
0.673367	0.443	0.366	0.345
0.681368	0.443	0.366	0.345
0.689369	0.443	0.366	0.345
0.69737	0.443	0.367	0.345
0.705371	0.443	0.367	0.345
0.713371	0.443	0.367	0.345
0.721372	0.443	0.367	0.345
0.729373	0.443	0.367	0.345
0.737374	0.443	0.367	0.345
0.745375	0.443	0.367	0.345
0.753375	0.443	0.367	0.345
0.761376	0.443	0.367	0.345
0.769377	0.443	0.367	0.345
0.777378	0.443	0.367	0.345
0.785379	0.443	0.367	0.345
0.793379	0.443	0.367	0.346
0.80138	0.443	0.367	0.346
0.809381	0.444	0.367	0.346
0.817382	0.444	0.367	0.346
0.825383	0.444	0.367	0.346
0.833383	0.444	0.367	0.346
0.841384	0.444	0.367	0.346
0.849385	0.444	0.367	0.346
0.857386	0.444	0.367	0.346
0.865387	0.444	0.367	0.346
0.873387	0.444	0.367	0.346
0.881388	0.444	0.367	0.346
0.889389	0.444	0.367	0.346
0.89739	0.444	0.367	0.346
0.905391	0.444	0.367	0.346
0.913391	0.444	0.367	0.346
0.921392	0.444	0.367	0.346
0.929393	0.444	0.367	0.346
0.937394	0.444	0.368	0.346
0.945395	0.444	0.368	0.346
0.953395	0.444	0.368	0.346
0.961396	0.444	0.368	0.346
0.969397	0.444	0.368	0.346
0.977398	0.444	0.368	0.346
0.985399	0.444	0.368	0.346
0.993399	0.444	0.368	0.346
1.0014	0.444	0.368	0.346
1.0094	0.444	0.368	0.346
1.0174	0.444	0.368	0.346
1.0254	0.444	0.368	0.346
1.0334	0.444	0.368	0.346
1.0414	0.444	0.368	0.346
1.0494	0.444	0.368	0.346
1.05741	0.444	0.368	0.346
1.06541	0.444	0.368	0.346
1.07341	0.444	0.368	0.346
1.08141	0.444	0.368	0.346
1.08941	0.444	0.368	0.346
1.09741	0.444	0.368	0.346
1.10541	0.444	0.368	0.346
1.11341	0.444	0.368	0.346
1.12141	0.444	0.368	0.346
1.12941	0.444	0.368	0.346
1.13741	0.444	0.368	0.346
1.14541	0.444	0.368	0.346
1.15342	0.444	0.368	0.346
1.16142	0.444	0.368	0.346
1.16942	0.444	0.369	0.346
1.17742	0.444	0.369	0.346
1.18542	0.444	0.369	0.346
1.19342	0.444	0.369	0.346
1.20142	0.444	0.369	0.346
1.20942	0.444	0.369	0.346
1.21742	0.444	0.369	0.346
1.22542	0.444	0.369	0.346
1.23342	0.444	0.369	0.346
1.24142	0.444	0.369	0.346
1.24942	0.444	0.369	0.346
1.25743	0.444	0.369	0.346
1.26543	0.444	0.369	0.346
1.27343	0.444	0.369	0.346
1.28143	0.444	0.369	0.346
1.28943	0.444	0.369	0.346
1.29743	0.444	0.369	0.346
1.30543	0.444	0.369	0.346
1.31343	0.444	0.369	0.346
1.32143	0.444	0.369	0.346
1.32943	0.444	0.369	0.346
1.33743	0.444	0.369	0.346
1.34543	0.444	0.369	0.346
1.35344	0.444	0.369	0.346
1.36144	0.444	0.369	0.346
1.36944	0.444	0.369	0.346
1.37744	0.444	0.369	0.346
1.38544	0.444	0.369	0.346
1.39344	0.444	0.369	0.346
1.40144	0.444	0.37	0.346
1.40944	0.444	0.37	0.346
1.41744	0.444	0.37	0.346
1.42544	0.444	0.37	0.346
1.43344	0.444	0.37	0.346
1.44144	0.444	0.37	0.346
1.44944	0.444	0.37	0.346
1.45745	0.444	0.37	0.346
1.46545	0.444	0.37	0.346
1.47345	0.444	0.37	0.346
1.48145	0.444	0.37	0.346
1.48945	0.444	0.37	0.346
1.49745	0.444	0.37	0.346
1.50545	0.444	0.37	0.346
1.51345	0.444	0.37	0.346
1.52145	0.444	0.37	0.346
1.52945	0.444	0.37	0.346
1.53745	0.444	0.37	0.346
1.54545	0.444	0.37	0.346
1.55346	0.444	0.37	0.346
1.56146	0.444	0.37	0.346
1.56946	0.444	0.37	0.346
1.57746	0.444	0.37	0.346
1.58546	0.444	0.37	0.346
1.59346	0.444	0.37	0.346
1.60146	0.444	0.37	0.346
1.60946	0.444	0.37	0.346
1.61746	0.444	0.37	0.346
1.62546	0.444	0.37	0.346
1.63346	0.444	0.371	0.346
1.64146	0.444	0.371	0.346
1.64946	0.444	0.371	0.346
1.65747	0.444	0.371	0.346
1.66547	0.444	0.371	0.346
1.67347	0.444	0.371	0.346
1.68147	0.444	0.371	0.346
1.68947	0.444	0.371	0.346
1.69747	0.444	0.371	0.346
1.70547	0.444	0.371	0.346
1.71347	0.444	0.371	0.346
1.72147	0.444	0.371	0.346
1.72947	0.444	0.371	0.346
1.73747	0.444	0.371	0.346
1.74547	0.444	0.371	0.346
1.75348	0.444	0.371	0.346
1.76148	0.444	0.371	0.346
1.76948	0.444	0.371	0.346
1.77748	0.444	0.371	0.346
1.78548	0.444	0.371	0.346
1.79348	0.444	0.371	0.346
1.80148	0.445	0.371	0.346
1.80948	0.445	0.371	0.346
1.81748	0.445	0.371	0.346
1.82548	0.445	0.371	0.346
1.83348	0.445	0.371	0.346
1.84148	0.445	0.371	0.346
1.84948	0.445	0.371	0.346
1.85749	0.445	0.371	0.346
1.86549	0.445	0.372	0.346
1.87349	0.445	0.372	0.346
1.88149	0.445	0.372	0.346
1.88949	0.445	0.372	0.346
1.89749	0.445	0.372	0.346
1.90549	0.445	0.372	0.346
1.91349	0.445	0.372	0.346
1.92149	0.445	0.372	0.346
1.92949	0.445	0.372	0.346
1.93749	0.445	0.372	0.346
1.94549	0.445	0.372	0.346
1.9535	0.445	0.372	0.347
1.9615	0.445	0.372	0.347
1.9695	0.445	0.372	0.347
1.9775	0.445	0.372	0.347
1.9855	0.445	0.372	0.347
1.9935	0.445	0.372	0.347
2.0015	0.445	0.372	0.347
2.0095	0.445	0.372	0.347
2.0175	0.445	0.372	0.347
2.0255	0.445	0.372	0.347
2.0335	0.445	0.372	0.347
2.0415	0.445	0.372	0.347
2.0495	0.445	0.372	0.347
2.05751	0.445	0.372	0.347
2.06551	0.445	0.372	0.347
2.07351	0.445	0.372	0.347
2.08151	0.445	0.372	0.347
2.08951	0.445	0.372	0.347
2.09751	0.445	0.373	0.347
2.10551	0.445	0.373	0.347
2.11351	0.445	0.373	0.347
2.12151	0.445	0.373	0.347
2.12951	0.445	0.373	0.347
2.13751	0.445	0.373	0.347
2.14551	0.445	0.373	0.347
2.15352	0.445	0.373	0.347
2.16152	0.445	0.373	0.347
2.16952	0.445	0.373	0.347
2.17752	0.445	0.373	0.347
2.18552	0.445	0.373	0.347
2.19352	0.445	0.373	0.347
2.20152	0.445	0.373	0.347
2.20952	0.445	0.373	0.347
2.21752	0.445	0.373	0.347
2.22552	0.445	0.373	0.347
2.23352	0.445	0.373	0.347
2.24152	0.445	0.373	0.347
2.24952	0.445	0.373	0.347
2.25753	0.445	0.373	0.347
2.26553	0.445	0.373	0.347
2.27353	0.445	0.373	0.347
2.28153	0.445	0.373	0.347
2.28953	0.445	0.373	0.347
2.29753	0.445	0.373	0.347
2.30553	0.445	0.373	0.347
2.31353	0.445	0.373	0.347
2.32153	0.445	0.373	0.347
2.32953	0.445	0.374	0.347
2.33753	0.445	0.374	0.347
2.34553	0.445	0.374	0.347
2.35354	0.445	0.374	0.347
2.36154	0.445	0.374	0.347
2.36954	0.445	0.374	0.347
2.37754	0.445	0.374	0.347
2.38554	0.445	0.374	0.347
2.39354	0.445	0.374	0.347
2.40154	0.445	0.374	0.347
2.40954	0.445	0.374	0.347
2.41754	0.445	0.374	0.347
2.42554	0.445	0.374	0.347
2.43354	0.445	0.374	0.347
2.44154	0.445	0.374	0.347
2.44954	0.445	0.374	0.347
2.45755	0.445	0.374	0.347
2.46555	0.445	0.374	0.347
2.47355	0.445	0.374	0.347
2.48155	0.445	0.374	0.347
2.48955	0.445	0.374	0.347
2.49755	0.445	0.374	0.347
2.50555	0.445	0.374	0.347
2.51355	0.445	0.374	0.347
2.52155	0.445	0.374	0.347
2.52955	0.445	0.374	0.347
2.53755	0.445	0.374	0.347
2.54555	0.445	0.374	0.347
2.55356	0.445	0.374	0.347
2.56156	0.445	0.374	0.347
2.56956	0.445	0.375	0.347
2.57756	0.445	0.375	0.347
2.58556	0.445	0.375	0.347
2.59356	0.445	0.375	0.347
2.60156	0.445	0.375	0.347
2.60956	0.445	0.375	0.347
2.61756	0.445	0.375	0.347
2.62556	0.445	0.375	0.347
2.63356	0.445	0.375	0.347
2.64156	0.445	0.375	0.347
2.64956	0.445	0.375	0.347
2.65757	0.445	0.375	0.347
2.66557	0.445	0.375	0.347
2.67357	0.445	0.375	0.347
2.68157	0.445	0.375	0.347
2.68957	0.445	0.375	0.347
2.69757	0.445	0.375	0.347
2.70557	0.445	0.375	0.347
2.71357	0.445	0.375	0.347
2.72157	0.445	0.375	0.347
2.72957	0.445	0.375	0.347
2.73757	0.445	0.375	0.347
2.74557	0.445	0.375	0.347
2.75358	0.445	0.375	0.347
2.76158	0.445	0.375	0.347
2.76958	0.445	0.375	0.347
2.77758	0.445	0.375	0.347
2.78558	0.445	0.375	0.347
2.79358	0.445	0.375	0.347
2.80158	0.445	0.376	0.347
2.80958	0.446	0.376	0.347
2.81758	0.446	0.376	0.347
2.82558	0.446	0.376	0.347
2.83358	0.446	0.376	0.347
2.84158	0.446	0.376	0.347
2.84958	0.446	0.376	0.347
2.85759	0.446	0.376	0.347
2.86559	0.446	0.376	0.347
2.87359	0.446	0.376	0.347
2.88159	0.446	0.376	0.347
2.88959	0.446	0.376	0.347
2.89759	0.446	0.376	0.347
2.90559	0.446	0.376	0.347
2.91359	0.446	0.376	0.347
2.92159	0.446	0.376	0.347
2.92959	0.446	0.376	0.347
2.93759	0.446	0.376	0.347
2.94559	0.446	0.376	0.347
2.9536	0.446	0.376	0.347
2.9616	0.446	0.376	0.347
2.9696	0.446	0.376	0.347
2.9776	0.446	0.376	0.347
2.9856	0.446	0.376	0.347
[truncated: 8,001 more rows]

## Sheet: Figure-S1E
time(min)	xhb_WT(EL)	xhb_Stau-(EL)	xhb_Bcd1.0(EL)
-10	0.3	0	0.3
-9.992	0.3	0.323	0.301
-9.984	0.3	0.323	0.301
-9.976	0.3	0.323	0.301
-9.968	0.3	0.323	0.302
-9.96	0.3	0.323	0.302
-9.952	0.3	0.323	0.303
-9.94399	0.3	0.323	0.303
-9.93599	0.301	0.323	0.303
-9.92799	0.301	0.323	0.304
-9.91999	0.301	0.323	0.304
-9.91199	0.301	0.323	0.305
-9.90399	0.301	0.323	0.305
-9.89599	0.301	0.323	0.305
-9.88799	0.301	0.323	0.306
-9.87999	0.301	0.323	0.306
-9.87199	0.301	0.323	0.307
-9.86399	0.301	0.323	0.307
-9.85599	0.301	0.323	0.307
-9.84798	0.301	0.323	0.308
-9.83998	0.301	0.323	0.308
-9.83198	0.301	0.323	0.309
-9.82398	0.301	0.323	0.309
-9.81598	0.301	0.323	0.309
-9.80798	0.301	0.323	0.31
-9.79998	0.301	0.323	0.31
-9.79198	0.301	0.323	0.31
-9.78398	0.301	0.323	0.311
-9.77598	0.301	0.324	0.311
-9.76798	0.301	0.324	0.312
-9.75998	0.301	0.324	0.312
-9.75198	0.301	0.324	0.312
-9.74397	0.301	0.324	0.313
-9.73597	0.301	0.324	0.313
-9.72797	0.301	0.324	0.313
-9.71997	0.301	0.324	0.314
-9.71197	0.301	0.324	0.314
-9.70397	0.301	0.324	0.314
-9.69597	0.301	0.324	0.315
-9.68797	0.301	0.324	0.315
-9.67997	0.302	0.324	0.315
-9.67197	0.302	0.324	0.316
-9.66397	0.302	0.324	0.316
-9.65597	0.302	0.324	0.316
-9.64796	0.302	0.324	0.317
-9.63996	0.302	0.324	0.317
-9.63196	0.302	0.324	0.317
-9.62396	0.302	0.324	0.317
-9.61596	0.302	0.324	0.318
-9.60796	0.302	0.324	0.318
-9.59996	0.302	0.324	0.318
-9.59196	0.302	0.324	0.319
-9.58396	0.302	0.324	0.319
-9.57596	0.302	0.324	0.319
-9.56796	0.302	0.324	0.319
-9.55996	0.302	0.324	0.32
-9.55196	0.302	0.324	0.32
-9.54395	0.302	0.324	0.32
-9.53595	0.302	0.324	0.32
-9.52795	0.302	0.324	0.321
-9.51995	0.302	0.324	0.321
-9.51195	0.302	0.324	0.321
-9.50395	0.302	0.324	0.321
-9.49595	0.302	0.324	0.322
-9.48795	0.302	0.324	0.322
-9.47995	0.302	0.324	0.322
-9.47195	0.302	0.324	0.322
-9.46395	0.302	0.324	0.323
-9.45595	0.303	0.324	0.323
-9.44794	0.303	0.324	0.323
-9.43994	0.303	0.324	0.323
-9.43194	0.303	0.324	0.323
-9.42394	0.303	0.324	0.324
-9.41594	0.303	0.324	0.324
-9.40794	0.303	0.324	0.324
-9.39994	0.303	0.324	0.324
-9.39194	0.303	0.324	0.324
-9.38394	0.303	0.324	0.325
-9.37594	0.303	0.324	0.325
-9.36794	0.303	0.324	0.325
-9.35994	0.303	0.324	0.325
-9.35194	0.303	0.324	0.325
-9.34393	0.303	0.324	0.325
-9.33593	0.303	0.324	0.326
-9.32793	0.303	0.324	0.326
-9.31993	0.303	0.324	0.326
-9.31193	0.303	0.324	0.326
-9.30393	0.303	0.325	0.326
-9.29593	0.303	0.325	0.326
-9.28793	0.303	0.325	0.327
-9.27993	0.303	0.325	0.327
-9.27193	0.303	0.325	0.327
-9.26393	0.303	0.325	0.327
-9.25593	0.304	0.325	0.327
-9.24792	0.304	0.325	0.327
-9.23992	0.304	0.325	0.327
-9.23192	0.304	0.325	0.328
-9.22392	0.304	0.325	0.328
-9.21592	0.304	0.325	0.328
-9.20792	0.304	0.325	0.328
-9.19992	0.304	0.325	0.328
-9.19192	0.304	0.325	0.328
-9.18392	0.304	0.325	0.328
-9.17592	0.304	0.325	0.328
-9.16792	0.304	0.325	0.329
-9.15992	0.304	0.325	0.329
-9.15192	0.304	0.325	0.329
-9.14391	0.304	0.325	0.329
-9.13591	0.304	0.325	0.329
-9.12791	0.304	0.325	0.329
-9.11991	0.304	0.325	0.329
-9.11191	0.304	0.325	0.329
-9.10391	0.304	0.325	0.33
-9.09591	0.304	0.325	0.33
-9.08791	0.304	0.325	0.33
-9.07991	0.305	0.325	0.33
-9.07191	0.305	0.325	0.33
-9.06391	0.305	0.325	0.33
-9.05591	0.305	0.325	0.33
-9.0479	0.305	0.325	0.33
-9.0399	0.305	0.325	0.33
-9.0319	0.305	0.325	0.331
-9.0239	0.305	0.325	0.331
-9.0159	0.305	0.325	0.331
-9.0079	0.305	0.325	0.331
-8.9999	0.305	0.325	0.331
-8.9919	0.305	0.325	0.331
-8.9839	0.305	0.325	0.331
-8.9759	0.305	0.325	0.331
-8.9679	0.305	0.325	0.331
-8.9599	0.305	0.325	0.331
-8.9519	0.305	0.325	0.331
-8.94389	0.305	0.325	0.332
-8.93589	0.305	0.325	0.332
-8.92789	0.305	0.325	0.332
-8.91989	0.305	0.325	0.332
-8.91189	0.306	0.325	0.332
-8.90389	0.306	0.325	0.332
-8.89589	0.306	0.325	0.332
-8.88789	0.306	0.325	0.332
-8.87989	0.306	0.325	0.332
-8.87189	0.306	0.325	0.332
-8.86389	0.306	0.325	0.332
-8.85589	0.306	0.325	0.332
-8.84788	0.306	0.326	0.333
-8.83988	0.306	0.326	0.333
-8.83188	0.306	0.326	0.333
-8.82388	0.306	0.326	0.333
-8.81588	0.306	0.326	0.333
-8.80788	0.306	0.326	0.333
-8.79988	0.306	0.326	0.333
-8.79188	0.306	0.326	0.333
-8.78388	0.306	0.326	0.333
-8.77588	0.306	0.326	0.333
-8.76788	0.307	0.326	0.333
-8.75988	0.307	0.326	0.333
-8.75188	0.307	0.326	0.333
-8.74387	0.307	0.326	0.333
-8.73587	0.307	0.326	0.334
-8.72787	0.307	0.326	0.334
-8.71987	0.307	0.326	0.334
-8.71187	0.307	0.326	0.334
-8.70387	0.307	0.326	0.334
-8.69587	0.433	0.326	0.334
-8.68787	0.433	0.326	0.334
-8.67987	0.433	0.326	0.334
-8.67187	0.433	0.326	0.334
-8.66387	0.433	0.326	0.334
-8.65587	0.433	0.326	0.334
-8.64786	0.434	0.326	0.334
-8.63986	0.434	0.326	0.334
-8.63186	0.434	0.326	0.334
-8.62386	0.434	0.326	0.334
-8.61586	0.434	0.326	0.335
-8.60786	0.434	0.326	0.335
-8.59986	0.434	0.326	0.335
-8.59186	0.434	0.326	0.335
-8.58386	0.434	0.326	0.335
-8.57586	0.435	0.326	0.335
-8.56786	0.435	0.326	0.335
-8.55986	0.435	0.326	0.335
-8.55186	0.435	0.326	0.335
-8.54385	0.435	0.326	0.335
-8.53585	0.435	0.326	0.335
-8.52785	0.435	0.326	0.335
-8.51985	0.435	0.326	0.335
-8.51185	0.435	0.326	0.335
-8.50385	0.435	0.326	0.335
-8.49585	0.435	0.326	0.335
-8.48785	0.436	0.326	0.335
-8.47985	0.436	0.326	0.335
-8.47185	0.436	0.326	0.335
-8.46385	0.436	0.326	0.336
-8.45585	0.436	0.326	0.336
-8.44784	0.436	0.326	0.336
-8.43984	0.436	0.326	0.336
-8.43184	0.436	0.326	0.336
-8.42384	0.436	0.327	0.336
-8.41584	0.436	0.327	0.336
-8.40784	0.436	0.327	0.336
-8.39984	0.436	0.327	0.336
-8.39184	0.436	0.327	0.336
-8.38384	0.437	0.327	0.336
-8.37584	0.437	0.327	0.336
-8.36784	0.437	0.327	0.336
-8.35984	0.437	0.327	0.336
-8.35184	0.437	0.327	0.336
-8.34383	0.437	0.327	0.336
-8.33583	0.437	0.327	0.336
-8.32783	0.437	0.327	0.336
-8.31983	0.437	0.327	0.336
-8.31183	0.437	0.327	0.336
-8.30383	0.437	0.327	0.336
-8.29583	0.437	0.327	0.337
-8.28783	0.437	0.327	0.337
-8.27983	0.437	0.327	0.337
-8.27183	0.437	0.327	0.337
-8.26383	0.437	0.327	0.337
-8.25583	0.438	0.327	0.337
-8.24782	0.438	0.327	0.337
-8.23982	0.438	0.327	0.337
-8.23182	0.438	0.327	0.337
-8.22382	0.438	0.327	0.337
-8.21582	0.438	0.327	0.337
-8.20782	0.438	0.327	0.337
-8.19982	0.438	0.327	0.337
-8.19182	0.438	0.327	0.337
-8.18382	0.438	0.327	0.337
-8.17582	0.438	0.327	0.337
-8.16782	0.438	0.327	0.337
-8.15982	0.438	0.327	0.337
-8.15182	0.438	0.327	0.337
-8.14381	0.438	0.327	0.337
-8.13581	0.438	0.327	0.337
-8.12781	0.438	0.327	0.337
-8.11981	0.438	0.327	0.337
-8.11181	0.438	0.327	0.337
-8.10381	0.439	0.327	0.337
-8.09581	0.439	0.327	0.338
-8.08781	0.439	0.327	0.338
-8.07981	0.439	0.327	0.338
-8.07181	0.439	0.327	0.338
-8.06381	0.439	0.327	0.338
-8.05581	0.439	0.327	0.338
-8.0478	0.439	0.327	0.338
-8.0398	0.439	0.327	0.338
-8.0318	0.439	0.327	0.338
-8.0238	0.439	0.327	0.338
-8.0158	0.439	0.328	0.338
-8.0078	0.439	0.328	0.338
-7.9998	0.439	0.328	0.338
-7.9918	0.439	0.328	0.338
-7.9838	0.439	0.328	0.338
-7.9758	0.439	0.328	0.338
-7.9678	0.439	0.328	0.338
-7.9598	0.439	0.328	0.338
-7.9518	0.439	0.328	0.338
-7.94379	0.439	0.328	0.338
-7.93579	0.439	0.328	0.338
-7.92779	0.439	0.328	0.338
-7.91979	0.439	0.328	0.338
-7.91179	0.44	0.328	0.338
-7.90379	0.44	0.328	0.338
-7.89579	0.44	0.328	0.338
-7.88779	0.44	0.328	0.338
-7.87979	0.44	0.328	0.338
-7.87179	0.44	0.328	0.338
-7.86379	0.44	0.328	0.339
-7.85579	0.44	0.328	0.339
-7.84778	0.44	0.328	0.339
-7.83978	0.44	0.328	0.339
-7.83178	0.44	0.328	0.339
-7.82378	0.44	0.328	0.339
-7.81578	0.44	0.328	0.339
-7.80778	0.44	0.328	0.339
-7.79978	0.44	0.328	0.339
-7.79178	0.44	0.328	0.339
-7.78378	0.44	0.328	0.339
-7.77578	0.44	0.328	0.339
-7.76778	0.44	0.328	0.339
-7.75978	0.44	0.328	0.339
-7.75178	0.44	0.328	0.339
-7.74377	0.44	0.328	0.339
-7.73577	0.44	0.328	0.339
-7.72777	0.44	0.328	0.339
-7.71977	0.44	0.328	0.339
-7.71177	0.44	0.328	0.339
-7.70377	0.44	0.328	0.339
-7.69577	0.44	0.328	0.339
-7.68777	0.441	0.328	0.339
-7.67977	0.441	0.328	0.339
-7.67177	0.441	0.328	0.339
-7.66377	0.441	0.328	0.339
-7.65577	0.441	0.328	0.339
-7.64776	0.441	0.328	0.339
-7.63976	0.441	0.328	0.339
-7.63176	0.441	0.328	0.339
-7.62376	0.441	0.329	0.339
-7.61576	0.441	0.329	0.339
-7.60776	0.441	0.329	0.339
-7.59976	0.441	0.329	0.339
-7.59176	0.441	0.329	0.34
-7.58376	0.441	0.329	0.34
-7.57576	0.441	0.329	0.34
-7.56776	0.441	0.329	0.34
-7.55976	0.441	0.329	0.34
-7.55176	0.441	0.329	0.34
-7.54375	0.441	0.329	0.34
-7.53575	0.441	0.329	0.34
-7.52775	0.441	0.329	0.34
-7.51975	0.441	0.329	0.34
-7.51175	0.441	0.329	0.34
-7.50375	0.441	0.329	0.34
-7.49575	0.441	0.329	0.34
-7.48775	0.441	0.329	0.34
-7.47975	0.441	0.329	0.34
-7.47175	0.441	0.329	0.34
-7.46375	0.441	0.329	0.34
-7.45575	0.441	0.329	0.34
-7.44774	0.441	0.329	0.34
-7.43974	0.441	0.329	0.34
-7.43174	0.441	0.329	0.34
-7.42374	0.441	0.329	0.34
-7.41574	0.441	0.329	0.34
-7.40774	0.441	0.329	0.34
-7.39974	0.442	0.329	0.34
-7.39174	0.442	0.329	0.34
-7.38374	0.442	0.329	0.34
-7.37574	0.442	0.329	0.34
-7.36774	0.442	0.329	0.34
-7.35974	0.442	0.329	0.34
-7.35174	0.442	0.329	0.34
-7.34373	0.442	0.329	0.34
-7.33573	0.442	0.329	0.34
-7.32773	0.442	0.329	0.34
-7.31973	0.442	0.329	0.34
-7.31173	0.442	0.329	0.34
-7.30373	0.442	0.329	0.34
-7.29573	0.442	0.329	0.34
-7.28773	0.442	0.329	0.34
-7.27973	0.442	0.329	0.341
-7.27173	0.442	0.329	0.341
-7.26373	0.442	0.329	0.341
-7.25573	0.442	0.329	0.341
-7.24772	0.442	0.329	0.341
-7.23972	0.442	0.33	0.341
-7.23172	0.442	0.33	0.341
-7.22372	0.442	0.33	0.341
-7.21572	0.442	0.33	0.341
-7.20772	0.442	0.33	0.341
-7.19972	0.442	0.33	0.341
-7.19172	0.442	0.33	0.341
-7.18372	0.442	0.33	0.341
-7.17572	0.442	0.33	0.341
-7.16772	0.442	0.33	0.341
-7.15972	0.442	0.33	0.341
-7.15172	0.442	0.33	0.341
-7.14371	0.442	0.33	0.341
-7.13571	0.442	0.33	0.341
-7.12771	0.442	0.33	0.341
-7.11971	0.442	0.33	0.341
-7.11171	0.442	0.33	0.341
-7.10371	0.442	0.33	0.341
-7.09571	0.442	0.33	0.341
-7.08771	0.442	0.33	0.341
-7.07971	0.442	0.33	0.341
-7.07171	0.442	0.33	0.341
-7.06371	0.442	0.33	0.341
-7.05571	0.442	0.33	0.341
-7.0477	0.442	0.33	0.341
-7.0397	0.443	0.33	0.341
-7.0317	0.443	0.33	0.341
-7.0237	0.443	0.33	0.341
-7.0157	0.443	0.33	0.341
-7.0077	0.443	0.33	0.341
-6.9997	0.443	0.33	0.341
-6.9917	0.443	0.33	0.341
-6.9837	0.443	0.33	0.341
-6.9757	0.443	0.33	0.341
-6.9677	0.443	0.33	0.341
-6.9597	0.443	0.33	0.341
-6.9517	0.443	0.33	0.341
-6.94369	0.443	0.33	0.341
-6.93569	0.443	0.33	0.341
-6.92769	0.443	0.33	0.341
-6.91969	0.443	0.33	0.341
-6.91169	0.443	0.33	0.342
-6.90369	0.443	0.33	0.342
-6.89569	0.443	0.33	0.342
-6.88769	0.443	0.33	0.342
-6.87969	0.443	0.33	0.342
-6.87169	0.443	0.331	0.342
-6.86369	0.443	0.331	0.342
-6.85569	0.443	0.331	0.342
-6.84768	0.443	0.331	0.342
-6.83968	0.443	0.331	0.342
-6.83168	0.443	0.331	0.342
-6.82368	0.443	0.331	0.342
-6.81568	0.443	0.331	0.342
-6.80768	0.443	0.331	0.342
-6.79968	0.443	0.331	0.342
-6.79168	0.443	0.331	0.342
-6.78368	0.443	0.331	0.342
-6.77568	0.443	0.331	0.342
-6.76768	0.443	0.331	0.342
-6.75968	0.443	0.331	0.342
-6.75168	0.443	0.331	0.342
-6.74367	0.443	0.331	0.342
-6.73567	0.443	0.331	0.342
-6.72767	0.443	0.331	0.342
-6.71967	0.443	0.331	0.342
-6.71167	0.443	0.331	0.342
-6.70367	0.443	0.331	0.342
-6.69567	0.443	0.331	0.342
-6.68767	0.443	0.331	0.342
-6.67967	0.443	0.331	0.342
-6.67167	0.443	0.331	0.342
-6.66367	0.443	0.331	0.342
-6.65567	0.443	0.331	0.342
-6.64766	0.443	0.331	0.342
-6.63966	0.443	0.331	0.342
-6.63166	0.443	0.331	0.342
-6.62366	0.443	0.331	0.342
-6.61566	0.443	0.331	0.342
-6.60766	0.443	0.331	0.342
-6.59966	0.444	0.331	0.342
-6.59166	0.444	0.331	0.342
-6.58366	0.444	0.331	0.342
-6.57566	0.444	0.331	0.342
-6.56766	0.444	0.331	0.342
-6.55966	0.444	0.331	0.342
-6.55166	0.444	0.331	0.342
-6.54365	0.444	0.331	0.342
-6.53565	0.444	0.331	0.342
-6.52765	0.444	0.331	0.342
-6.51965	0.444	0.332	0.342
-6.51165	0.444	0.332	0.342
-6.50365	0.444	0.332	0.342
-6.49565	0.444	0.332	0.342
-6.48765	0.444	0.332	0.343
-6.47965	0.444	0.332	0.343
-6.47165	0.444	0.332	0.343
-6.46365	0.444	0.332	0.343
-6.45565	0.444	0.332	0.343
-6.44764	0.444	0.332	0.343
-6.43964	0.444	0.332	0.343
-6.43164	0.444	0.332	0.343
-6.42364	0.444	0.332	0.343
-6.41564	0.444	0.332	0.343
-6.40764	0.444	0.332	0.343
-6.39964	0.444	0.332	0.343
-6.39164	0.444	0.332	0.343
-6.38364	0.444	0.332	0.343
-6.37564	0.444	0.332	0.343
-6.36764	0.444	0.332	0.343
-6.35964	0.444	0.332	0.343
-6.35164	0.444	0.332	0.343
-6.34363	0.444	0.332	0.343
-6.33563	0.444	0.332	0.343
-6.32763	0.444	0.332	0.343
-6.31963	0.444	0.332	0.343
-6.31163	0.444	0.332	0.343
-6.30363	0.444	0.332	0.343
-6.29563	0.444	0.332	0.343
-6.28763	0.444	0.332	0.343
-6.27963	0.444	0.332	0.343
-6.27163	0.444	0.332	0.343
-6.26363	0.444	0.332	0.343
-6.25563	0.444	0.332	0.343
-6.24762	0.444	0.332	0.343
-6.23962	0.444	0.332	0.343
-6.23162	0.444	0.332	0.343
-6.22362	0.444	0.332	0.343
-6.21562	0.444	0.332	0.343
-6.20762	0.444	0.332	0.343
-6.19962	0.444	0.332	0.343
-6.19162	0.444	0.332	0.343
-6.18362	0.444	0.332	0.343
-6.17562	0.444	0.333	0.343
-6.16762	0.444	0.333	0.343
-6.15962	0.444	0.333	0.343
-6.15162	0.444	0.333	0.343
-6.14361	0.444	0.333	0.343
-6.13561	0.444	0.333	0.343
-6.12761	0.444	0.333	0.343
-6.11961	0.444	0.333	0.343
-6.11161	0.444	0.333	0.343
-6.10361	0.444	0.333	0.343
-6.09561	0.444	0.333	0.343
-6.08761	0.444	0.333	0.343
-6.07961	0.444	0.333	0.343
-6.07161	0.445	0.333	0.343
-6.06361	0.445	0.333	0.343
-6.05561	0.445	0.333	0.343
-6.0476	0.445	0.333	0.343
-6.0396	0.445	0.333	0.343
-6.0316	0.445	0.333	0.343
-6.0236	0.445	0.333	0.343
-6.0156	0.445	0.333	0.344
-6.0076	0.445	0.333	0.344
-5.9996	0.445	0.333	0.344
-5.9916	0.445	0.333	0.344
-5.9836	0.445	0.333	0.344
-5.9756	0.445	0.333	0.344
-5.9676	0.445	0.333	0.344
-5.9596	0.445	0.333	0.344
-5.9516	0.445	0.333	0.344
-5.94359	0.445	0.333	0.344
-5.93559	0.445	0.333	0.344
-5.92759	0.445	0.333	0.344
-5.91959	0.445	0.333	0.344
-5.91159	0.445	0.333	0.344
-5.90359	0.445	0.333	0.344
-5.89559	0.445	0.333	0.344
-5.88759	0.445	0.333	0.344
-5.87959	0.445	0.333	0.344
-5.87159	0.445	0.333	0.344
-5.86359	0.445	0.333	0.344
-5.85559	0.445	0.333	0.344
-5.84758	0.445	0.333	0.344
-5.83958	0.445	0.333	0.344
-5.83158	0.445	0.334	0.344
-5.82358	0.445	0.334	0.344
-5.81558	0.445	0.334	0.344
-5.80758	0.445	0.334	0.344
-5.79958	0.445	0.334	0.344
-5.79158	0.445	0.334	0.344
-5.78358	0.445	0.334	0.344
-5.77558	0.445	0.334	0.344
-5.76758	0.445	0.334	0.344
-5.75958	0.445	0.334	0.344
-5.75158	0.445	0.334	0.344
-5.74357	0.445	0.334	0.344
-5.73557	0.445	0.334	0.344
-5.72757	0.445	0.334	0.344
-5.71957	0.445	0.334	0.344
-5.71157	0.445	0.334	0.344
-5.70357	0.445	0.334	0.344
-5.69557	0.445	0.334	0.344
-5.68757	0.445	0.334	0.344
-5.67957	0.445	0.334	0.344
-5.67157	0.445	0.334	0.344
-5.66357	0.445	0.334	0.344
-5.65557	0.445	0.334	0.344
-5.64756	0.445	0.334	0.344
-5.63956	0.445	0.334	0.344
-5.63156	0.445	0.334	0.344
-5.62356	0.445	0.334	0.344
-5.61556	0.445	0.334	0.344
-5.60756	0.445	0.334	0.344
-5.59956	0.445	0.334	0.344
-5.59156	0.445	0.334	0.344
-5.58356	0.445	0.334	0.344
-5.57556	0.445	0.334	0.344
-5.56756	0.445	0.334	0.344
-5.55956	0.445	0.334	0.344
-5.55156	0.445	0.334	0.344
-5.54355	0.445	0.334	0.344
-5.53555	0.445	0.334	0.344
-5.52755	0.445	0.334	0.344
-5.51955	0.445	0.334	0.344
-5.51155	0.445	0.334	0.344
-5.50355	0.445	0.335	0.345
-5.49555	0.445	0.335	0.345
-5.48755	0.445	0.335	0.345
-5.47955	0.445	0.335	0.345
-5.47155	0.445	0.335	0.345
-5.46355	0.445	0.335	0.345
-5.45555	0.446	0.335	0.345
-5.44754	0.446	0.335	0.345
-5.43954	0.446	0.335	0.345
-5.43154	0.446	0.335	0.345
-5.42354	0.446	0.335	0.345
-5.41554	0.446	0.335	0.345
-5.40754	0.446	0.335	0.345
-5.39954	0.446	0.335	0.345
-5.39154	0.446	0.335	0.345
-5.38354	0.446	0.335	0.345
-5.37554	0.446	0.335	0.345
-5.36754	0.446	0.335	0.345
-5.35954	0.446	0.335	0.345
-5.35154	0.446	0.335	0.345
-5.34353	0.446	0.335	0.345
-5.33553	0.446	0.335	0.345
-5.32753	0.446	0.335	0.345
-5.31953	0.446	0.335	0.345
-5.31153	0.446	0.335	0.345
-5.30353	0.446	0.335	0.345
-5.29553	0.446	0.335	0.345
-5.28753	0.446	0.335	0.345
-5.27953	0.446	0.335	0.345
-5.27153	0.446	0.335	0.345
-5.26353	0.446	0.335	0.345
-5.25553	0.446	0.335	0.345
-5.24752	0.446	0.335	0.345
-5.23952	0.446	0.335	0.345
-5.23152	0.446	0.335	0.345
-5.22352	0.446	0.335	0.345
-5.21552	0.446	0.335	0.345
-5.20752	0.446	0.335	0.345
-5.19952	0.446	0.335	0.345
-5.19152	0.446	0.335	0.345
-5.18352	0.446	0.336	0.345
-5.17552	0.446	0.336	0.345
-5.16752	0.446	0.336	0.345
-5.15952	0.446	0.336	0.345
-5.15152	0.446	0.336	0.345
-5.14351	0.446	0.336	0.345
-5.13551	0.446	0.336	0.345
-5.12751	0.446	0.336	0.345
-5.11951	0.446	0.336	0.345
-5.11151	0.446	0.336	0.345
-5.10351	0.446	0.336	0.345
-5.09551	0.446	0.336	0.345
-5.08751	0.446	0.336	0.345
-5.07951	0.446	0.336	0.345
-5.07151	0.446	0.336	0.345
-5.06351	0.446	0.336	0.345
-5.05551	0.446	0.336	0.345
-5.0475	0.446	0.336	0.345
-5.0395	0.446	0.336	0.345
-5.0315	0.446	0.336	0.345
-5.0235	0.446	0.336	0.345
-5.0155	0.446	0.336	0.345
-5.0075	0.446	0.336	0.345
-4.9995	0.446	0.336	0.345
-4.9915	0.446	0.336	0.345
-4.9835	0.446	0.336	0.345
-4.9755	0.446	0.336	0.345
-4.9675	0.446	0.336	0.345
-4.9595	0.446	0.336	0.345
-4.9515	0.446	0.336	0.345
-4.94349	0.446	0.336	0.346
-4.93549	0.446	0.336	0.346
-4.92749	0.446	0.336	0.346
-4.91949	0.446	0.336	0.346
-4.91149	0.446	0.336	0.346
-4.90349	0.446	0.336	0.346
-4.89549	0.446	0.336	0.346
-4.88749	0.446	0.336	0.346
-4.87949	0.446	0.336	0.346
-4.87149	0.446	0.336	0.346
-4.86349	0.446	0.337	0.346
-4.85549	0.446	0.337	0.346
-4.84748	0.446	0.337	0.346
-4.83948	0.446	0.337	0.346
-4.83148	0.446	0.337	0.346
-4.82348	0.446	0.337	0.346
-4.81548	0.446	0.337	0.346
-4.80748	0.446	0.337	0.346
-4.79948	0.446	0.337	0.346
-4.79148	0.446	0.337	0.346
-4.78348	0.446	0.337	0.346
-4.77548	0.447	0.337	0.346
-4.76748	0.447	0.337	0.346
-4.75948	0.447	0.337	0.346
-4.75148	0.447	0.337	0.346
-4.74347	0.447	0.337	0.346
-4.73547	0.447	0.337	0.346
-4.72747	0.447	0.337	0.346
-4.71947	0.447	0.337	0.346
-4.71147	0.447	0.337	0.346
-4.70347	0.447	0.337	0.346
-4.69547	0.447	0.337	0.346
-4.68747	0.447	0.337	0.346
-4.67947	0.447	0.337	0.346
-4.67147	0.447	0.337	0.346
-4.66347	0.447	0.337	0.346
-4.65547	0.447	0.337	0.346
-4.64746	0.447	0.337	0.346
-4.63946	0.447	0.337	0.346
-4.63146	0.447	0.337	0.346
-4.62346	0.447	0.337	0.346
-4.61546	0.447	0.337	0.346
-4.60746	0.447	0.337	0.346
-4.59946	0.447	0.337	0.346
-4.59146	0.447	0.337	0.346
-4.58346	0.447	0.337	0.346
-4.57546	0.447	0.337	0.346
-4.56746	0.447	0.337	0.346
-4.55946	0.447	0.337	0.346
-4.55146	0.447	0.338	0.346
-4.54345	0.447	0.338	0.346
-4.53545	0.447	0.338	0.346
-4.52745	0.447	0.338	0.346
-4.51945	0.447	0.338	0.346
-4.51145	0.447	0.338	0.346
-4.50345	0.447	0.338	0.346
-4.49545	0.447	0.338	0.346
-4.48745	0.447	0.338	0.346
-4.47945	0.447	0.338	0.346
-4.47145	0.447	0.338	0.346
-4.46345	0.447	0.338	0.346
-4.45545	0.447	0.338	0.346
-4.44744	0.447	0.338	0.346
-4.43944	0.447	0.338	0.346
-4.43144	0.447	0.338	0.346
-4.42344	0.447	0.338	0.346
-4.41544	0.447	0.338	0.346
-4.40744	0.447	0.338	0.346
-4.39944	0.447	0.338	0.346
-4.39144	0.447	0.338	0.346
-4.38344	0.447	0.338	0.346
-4.37544	0.447	0.338	0.346
-4.36744	0.447	0.338	0.346
-4.35944	0.447	0.338	0.346
-4.35144	0.447	0.338	0.346
-4.34343	0.447	0.338	0.347
-4.33543	0.447	0.338	0.347
-4.32743	0.447	0.338	0.347
-4.31943	0.447	0.338	0.347
-4.31143	0.447	0.338	0.347
-4.30343	0.447	0.338	0.347
-4.29543	0.447	0.338	0.347
-4.28743	0.447	0.338	0.347
-4.27943	0.447	0.338	0.347
-4.27143	0.447	0.338	0.347
-4.26343	0.447	0.338	0.347
-4.25543	0.447	0.338	0.347
-4.24742	0.447	0.339	0.347
-4.23942	0.447	0.339	0.347
-4.23142	0.447	0.339	0.347
-4.22342	0.447	0.339	0.347
-4.21542	0.447	0.339	0.347
-4.20742	0.447	0.339	0.347
-4.19942	0.447	0.339	0.347
-4.19142	0.447	0.339	0.347
-4.18342	0.447	0.339	0.347
-4.17542	0.447	0.339	0.347
-4.16742	0.447	0.339	0.347
-4.15942	0.447	0.339	0.347
-4.15142	0.447	0.339	0.347
-4.14341	0.447	0.339	0.347
-4.13541	0.447	0.339	0.347
-4.12741	0.447	0.339	0.347
-4.11941	0.447	0.339	0.347
-4.11141	0.447	0.339	0.347
-4.10341	0.447	0.339	0.347
-4.09541	0.447	0.339	0.347
-4.08741	0.447	0.339	0.347
-4.07941	0.447	0.339	0.347
-4.07141	0.447	0.339	0.347
-4.06341	0.447	0.339	0.347
-4.05541	0.448	0.339	0.347
-4.0474	0.448	0.339	0.347
-4.0394	0.448	0.339	0.347
-4.0314	0.448	0.339	0.347
-4.0234	0.448	0.339	0.347
-4.0154	0.448	0.339	0.347
-4.0074	0.448	0.339	0.347
-3.9994	0.448	0.339	0.347
-3.9914	0.448	0.339	0.347
-3.9834	0.448	0.339	0.347
-3.9754	0.448	0.339	0.347
-3.9674	0.448	0.339	0.347
-3.9594	0.448	0.339	0.347
-3.9514	0.448	0.34	0.347
-3.94339	0.448	0.34	0.347
-3.93539	0.448	0.34	0.347
-3.92739	0.448	0.34	0.347
-3.91939	0.448	0.34	0.347
-3.91139	0.448	0.34	0.347
-3.90339	0.448	0.34	0.347
-3.89539	0.448	0.34	0.347
-3.88739	0.448	0.34	0.347
-3.87939	0.448	0.34	0.347
-3.87139	0.448	0.34	0.347
-3.86339	0.448	0.34	0.347
-3.85539	0.448	0.34	0.347
-3.84738	0.448	0.34	0.347
-3.83938	0.448	0.34	0.347
-3.83138	0.448	0.34	0.347
-3.82338	0.448	0.34	0.347
-3.81538	0.448	0.34	0.347
-3.80738	0.448	0.34	0.347
-3.79938	0.448	0.34	0.347
-3.79138	0.448	0.34	0.347
-3.78338	0.448	0.34	0.347
-3.77538	0.448	0.34	0.347
-3.76738	0.448	0.34	0.347
-3.75938	0.448	0.34	0.347
-3.75138	0.448	0.34	0.347
-3.74337	0.448	0.34	0.347
-3.73537	0.448	0.34	0.347
-3.72737	0.448	0.34	0.348
-3.71937	0.448	0.34	0.348
-3.71137	0.448	0.34	0.348
-3.70337	0.448	0.34	0.348
-3.69537	0.448	0.34	0.348
-3.68737	0.448	0.34	0.348
-3.67937	0.448	0.34	0.348
-3.67137	0.448	0.34	0.348
-3.66337	0.448	0.34	0.348
-3.65537	0.448	0.341	0.348
-3.64736	0.448	0.341	0.348
-3.63936	0.448	0.341	0.348
-3.63136	0.448	0.341	0.348
-3.62336	0.448	0.341	0.348
-3.61536	0.448	0.341	0.348
-3.60736	0.448	0.341	0.348
-3.59936	0.448	0.341	0.348
-3.59136	0.448	0.341	0.348
-3.58336	0.448	0.341	0.348
-3.57536	0.448	0.341	0.348
-3.56736	0.448	0.341	0.348
-3.55936	0.448	0.341	0.348
-3.55136	0.448	0.341	0.348
-3.54335	0.448	0.341	0.348
-3.53535	0.448	0.341	0.348
-3.52735	0.448	0.341	0.348
-3.51935	0.448	0.341	0.348
-3.51135	0.448	0.341	0.348
-3.50335	0.448	0.341	0.348
-3.49535	0.448	0.341	0.348
-3.48735	0.448	0.341	0.348
-3.47935	0.448	0.341	0.348
-3.47135	0.448	0.341	0.348
-3.46335	0.448	0.341	0.348
-3.45535	0.448	0.341	0.348
-3.44734	0.448	0.341	0.348
-3.43934	0.448	0.341	0.348
-3.43134	0.448	0.341	0.348
-3.42334	0.448	0.341	0.348
-3.41534	0.448	0.341	0.348
-3.40734	0.448	0.341	0.348
-3.39934	0.448	0.341	0.348
-3.39134	0.448	0.341	0.348
-3.38334	0.448	0.341	0.348
-3.37534	0.448	0.341	0.348
-3.36734	0.448	0.342	0.348
-3.35934	0.448	0.342	0.348
-3.35134	0.448	0.342	0.348
-3.34333	0.448	0.342	0.348
-3.33533	0.448	0.342	0.348
-3.32733	0.448	0.342	0.348
-3.31933	0.448	0.342	0.348
-3.31133	0.449	0.342	0.348
-3.30333	0.449	0.342	0.348
-3.29533	0.449	0.342	0.348
-3.28733	0.449	0.342	0.348
-3.27933	0.449	0.342	0.348
-3.27133	0.449	0.342	0.348
-3.26333	0.449	0.342	0.348
-3.25533	0.449	0.342	0.348
-3.24732	0.449	0.342	0.348
-3.23932	0.449	0.342	0.348
-3.23132	0.449	0.342	0.348
-3.22332	0.449	0.342	0.348
-3.21532	0.449	0.342	0.348
-3.20732	0.449	0.342	0.348
-3.19932	0.449	0.342	0.348
-3.19132	0.449	0.342	0.348
-3.18332	0.449	0.342	0.348
-3.17532	0.449	0.342	0.348
-3.16732	0.449	0.342	0.348
-3.15932	0.449	0.342	0.348
-3.15132	0.449	0.342	0.348
-3.14331	0.449	0.342	0.348
-3.13531	0.449	0.342	0.348
-3.12731	0.449	0.342	0.348
-3.11931	0.449	0.342	0.348
-3.11131	0.449	0.342	0.348
-3.10331	0.449	0.342	0.348
-3.09531	0.449	0.342	0.348
-3.08731	0.449	0.342	0.348
-3.07931	0.449	0.343	0.349
-3.07131	0.449	0.343	0.349
-3.06331	0.449	0.343	0.349
-3.05531	0.449	0.343	0.349
-3.0473	0.449	0.343	0.349
-3.0393	0.449	0.343	0.349
-3.0313	0.449	0.343	0.349
-3.0233	0.449	0.343	0.349
-3.0153	0.449	0.343	0.349
-3.0073	0.449	0.343	0.349
-2.9993	0.449	0.343	0.349
-2.9913	0.449	0.343	0.349
-2.9833	0.449	0.343	0.349
-2.9753	0.449	0.343	0.349
-2.9673	0.449	0.343	0.349
-2.9593	0.449	0.343	0.349
-2.9513	0.449	0.343	0.349
-2.94329	0.449	0.343	0.349
-2.93529	0.449	0.343	0.349
-2.92729	0.449	0.343	0.349
-2.91929	0.449	0.343	0.349
-2.91129	0.449	0.343	0.349
-2.90329	0.449	0.343	0.349
-2.89529	0.449	0.343	0.349
-2.88729	0.449	0.343	0.349
-2.87929	0.449	0.343	0.349
-2.87129	0.449	0.343	0.349
-2.86329	0.449	0.343	0.349
-2.85529	0.449	0.343	0.349
-2.84728	0.449	0.343	0.349
-2.83928	0.449	0.343	0.349
-2.83128	0.449	0.343	0.349
-2.82328	0.449	0.343	0.349
-2.81528	0.449	0.343	0.349
-2.80728	0.449	0.343	0.349
-2.79928	0.449	0.344	0.349
-2.79128	0.449	0.344	0.349
-2.78328	0.449	0.344	0.349
-2.77528	0.449	0.344	0.349
-2.76728	0.449	0.344	0.349
-2.75928	0.449	0.344	0.349
-2.75128	0.449	0.344	0.349
-2.74327	0.449	0.344	0.349
-2.73527	0.449	0.344	0.349
-2.72727	0.449	0.344	0.349
-2.71927	0.449	0.344	0.349
-2.71127	0.449	0.344	0.349
-2.70327	0.449	0.344	0.349
-2.69527	0.449	0.344	0.349
-2.68727	0.449	0.344	0.349
-2.67927	0.449	0.344	0.349
-2.67127	0.449	0.344	0.349
-2.66327	0.449	0.344	0.349
-2.65527	0.449	0.344	0.349
-2.64726	0.449	0.344	0.349
-2.63926	0.449	0.344	0.349
-2.63126	0.449	0.344	0.349
-2.62326	0.449	0.344	0.349
-2.61526	0.449	0.344	0.349
-2.60726	0.449	0.344	0.349
-2.59926	0.449	0.344	0.349
-2.59126	0.449	0.344	0.349
-2.58326	0.449	0.344	0.349
-2.57526	0.449	0.344	0.349
-2.56726	0.449	0.344	0.349
-2.55926	0.45	0.344	0.349
-2.55126	0.45	0.344	0.349
-2.54325	0.45	0.344	0.349
-2.53525	0.45	0.344	0.349
-2.52725	0.45	0.345	0.349
-2.51925	0.45	0.345	0.349
-2.51125	0.45	0.345	0.349
-2.50325	0.45	0.345	0.349
-2.49525	0.45	0.345	0.349
-2.48725	0.45	0.345	0.349
-2.47925	0.45	0.345	0.349
-2.47125	0.45	0.345	0.349
-2.46325	0.45	0.345	0.349
-2.45525	0.45	0.345	0.349
-2.44724	0.45	0.345	0.349
-2.43924	0.45	0.345	0.349
-2.43124	0.45	0.345	0.349
-2.42324	0.45	0.345	0.349
-2.41524	0.45	0.345	0.35
-2.40724	0.45	0.345	0.35
-2.39924	0.45	0.345	0.35
-2.39124	0.45	0.345	0.35
-2.38324	0.45	0.345	0.35
-2.37524	0.45	0.345	0.35
-2.36724	0.45	0.345	0.35
-2.35924	0.45	0.345	0.35
-2.35124	0.45	0.345	0.35
-2.34323	0.45	0.345	0.35
-2.33523	0.45	0.345	0.35
-2.32723	0.45	0.345	0.35
-2.31923	0.45	0.345	0.35
-2.31123	0.45	0.345	0.35
-2.30323	0.45	0.345	0.35
-2.29523	0.45	0.345	0.35
-2.28723	0.45	0.345	0.35
-2.27923	0.45	0.345	0.35
-2.27123	0.45	0.345	0.35
-2.26323	0.45	0.345	0.35
-2.25523	0.45	0.345	0.35
-2.24722	0.45	0.346	0.35
-2.23922	0.45	0.346	0.35
-2.23122	0.45	0.346	0.35
-2.22322	0.45	0.346	0.35
-2.21522	0.45	0.346	0.35
-2.20722	0.45	0.346	0.35
-2.19922	0.45	0.346	0.35
-2.19122	0.45	0.346	0.35
-2.18322	0.45	0.346	0.35
-2.17522	0.45	0.346	0.35
-2.16722	0.45	0.346	0.35
-2.15922	0.45	0.346	0.35
-2.15122	0.45	0.346	0.35
-2.14321	0.45	0.346	0.35
-2.13521	0.45	0.346	0.35
-2.12721	0.45	0.346	0.35
-2.11921	0.45	0.346	0.35
-2.11121	0.45	0.346	0.35
-2.10321	0.45	0.346	0.35
-2.09521	0.45	0.346	0.35
-2.08721	0.45	0.346	0.35
-2.07921	0.45	0.346	0.35
-2.07121	0.45	0.346	0.35
-2.06321	0.45	0.346	0.35
-2.05521	0.45	0.346	0.35
-2.0472	0.45	0.346	0.35
-2.0392	0.45	0.346	0.35
-2.0312	0.45	0.346	0.35
-2.0232	0.45	0.346	0.35
-2.0152	0.45	0.346	0.35
-2.0072	0.45	0.346	0.35
-1.9992	0.45	0.346	0.35
-1.9912	0.45	0.346	0.35
-1.9832	0.45	0.346	0.35
-1.9752	0.45	0.347	0.35
-1.9672	0.45	0.347	0.35
-1.9592	0.45	0.347	0.35
-1.9512	0.45	0.347	0.35
-1.94319	0.45	0.347	0.35
-1.93519	0.45	0.347	0.35
-1.92719	0.45	0.347	0.35
-1.91919	0.45	0.347	0.35
-1.91119	0.45	0.347	0.35
-1.90319	0.45	0.347	0.35
-1.89519	0.45	0.347	0.35
-1.88719	0.45	0.347	0.35
-1.87919	0.45	0.347	0.35
-1.87119	0.45	0.347	0.35
-1.86319	0.45	0.347	0.35
-1.85519	0.45	0.347	0.35
-1.84718	0.45	0.347	0.35
-1.83918	0.45	0.347	0.35
-1.83118	0.45	0.347	0.35
-1.82318	0.45	0.347	0.35
-1.81518	0.45	0.347	0.35
-1.80718	0.451	0.347	0.35
-1.79918	0.451	0.347	0.35
-1.79118	0.451	0.347	0.35
-1.78318	0.451	0.347	0.35
-1.77518	0.451	0.347	0.35
-1.76718	0.451	0.347	0.35
-1.75918	0.451	0.347	0.35
-1.75118	0.451	0.347	0.35
-1.74317	0.451	0.347	0.35
-1.73517	0.451	0.347	0.351
-1.72717	0.451	0.347	0.351
-1.71917	0.451	0.347	0.351
-1.71117	0.451	0.348	0.351
-1.70317	0.451	0.348	0.351
-1.69517	0.451	0.348	0.351
-1.68717	0.451	0.348	0.351
-1.67917	0.451	0.348	0.351
-1.67117	0.451	0.348	0.351
-1.66317	0.451	0.348	0.351
-1.65517	0.451	0.348	0.351
-1.64716	0.451	0.348	0.351
-1.63916	0.451	0.348	0.351
-1.63116	0.451	0.348	0.351
-1.62316	0.451	0.348	0.351
-1.61516	0.451	0.348	0.351
-1.60716	0.451	0.348	0.351
-1.59916	0.451	0.348	0.351
-1.59116	0.451	0.348	0.351
-1.58316	0.451	0.348	0.351
-1.57516	0.451	0.348	0.351
-1.56716	0.451	0.348	0.351
-1.55916	0.451	0.348	0.351
-1.55116	0.451	0.348	0.351
-1.54315	0.451	0.348	0.351
-1.53515	0.451	0.348	0.351
-1.52715	0.451	0.348	0.351
-1.51915	0.451	0.348	0.351
-1.51115	0.451	0.348	0.351
-1.50315	0.451	0.348	0.351
-1.49515	0.451	0.348	0.351
-1.48715	0.451	0.348	0.351
-1.47915	0.451	0.348	0.351
-1.47115	0.451	0.348	0.351
-1.46315	0.451	0.348	0.351
-1.45515	0.451	0.348	0.351
-1.44714	0.451	0.349	0.351
-1.43914	0.451	0.349	0.351
-1.43114	0.451	0.349	0.351
-1.42314	0.451	0.349	0.351
-1.41514	0.451	0.349	0.351
-1.40714	0.451	0.349	0.351
-1.39914	0.451	0.349	0.351
-1.39114	0.451	0.349	0.351
-1.38314	0.451	0.349	0.351
-1.37514	0.451	0.349	0.351
-1.36714	0.451	0.349	0.351
-1.35914	0.451	0.349	0.351
-1.35114	0.451	0.349	0.351
-1.34313	0.451	0.349	0.351
-1.33513	0.451	0.349	0.351
-1.32713	0.451	0.349	0.351
-1.31913	0.451	0.349	0.351
-1.31113	0.451	0.349	0.351
-1.30313	0.451	0.349	0.351
-1.29513	0.451	0.349	0.351
-1.28713	0.451	0.349	0.351
-1.27913	0.451	0.349	0.351
-1.27113	0.451	0.349	0.351
-1.26313	0.451	0.349	0.351
-1.25513	0.451	0.349	0.351
-1.24712	0.451	0.349	0.351
-1.23912	0.451	0.349	0.351
-1.23112	0.451	0.349	0.351
-1.22312	0.451	0.349	0.351
-1.21512	0.451	0.349	0.351
-1.20712	0.451	0.349	0.351
-1.19912	0.451	0.349	0.351
-1.19112	0.451	0.349	0.351
-1.18312	0.451	0.35	0.351
-1.17512	0.451	0.35	0.351
-1.16712	0.451	0.35	0.351
-1.15912	0.451	0.35	0.351
-1.15112	0.451	0.35	0.351
-1.14311	0.451	0.35	0.351
-1.13511	0.451	0.35	0.351
-1.12711	0.451	0.35	0.351
-1.11911	0.451	0.35	0.351
-1.11111	0.451	0.35	0.351
-1.10311	0.451	0.35	0.351
-1.09511	0.451	0.35	0.351
-1.08711	0.451	0.35	0.351
-1.07911	0.451	0.35	0.351
-1.07111	0.451	0.35	0.351
-1.06311	0.451	0.35	0.351
-1.05511	0.452	0.35	0.351
-1.0471	0.452	0.35	0.351
-1.0391	0.452	0.35	0.352
-1.0311	0.452	0.35	0.352
-1.0231	0.452	0.35	0.352
-1.0151	0.452	0.35	0.352
-1.0071	0.452	0.35	0.352
-0.9991	0.452	0.35	0.352
-0.991099	0.452	0.35	0.352
-0.983098	0.452	0.35	0.352
-0.975098	0.452	0.35	0.352
-0.967097	0.452	0.35	0.352
-0.959096	0.452	0.35	0.352
-0.951095	0.452	0.35	0.352
-0.943094	0.452	0.35	0.352
-0.935094	0.452	0.35	0.352
-0.927093	0.452	0.351	0.352
-0.919092	0.452	0.351	0.352
-0.911091	0.452	0.351	0.352
-0.90309	0.452	0.351	0.352
-0.89509	0.452	0.351	0.352
-0.887089	0.452	0.351	0.352
-0.879088	0.452	0.351	0.352
-0.871087	0.452	0.351	0.352
-0.863086	0.452	0.351	0.352
-0.855086	0.452	0.351	0.352
-0.847085	0.452	0.351	0.352
-0.839084	0.452	0.351	0.352
-0.831083	0.452	0.351	0.352
-0.823082	0.452	0.351	0.352
-0.815082	0.452	0.351	0.352
-0.807081	0.452	0.351	0.352
-0.79908	0.452	0.351	0.352
-0.791079	0.452	0.351	0.352
-0.783078	0.452	0.351	0.352
-0.775078	0.452	0.351	0.352
-0.767077	0.452	0.351	0.352
-0.759076	0.452	0.351	0.352
-0.751075	0.452	0.351	0.352
-0.743074	0.452	0.351	0.352
-0.735074	0.452	0.351	0.352
-0.727073	0.452	0.351	0.352
-0.719072	0.452	0.351	0.352
-0.711071	0.452	0.351	0.352
-0.70307	0.452	0.351	0.352
-0.69507	0.452	0.351	0.352
-0.687069	0.452	0.351	0.352
-0.679068	0.452	0.351	0.352
-0.671067	0.452	0.352	0.352
-0.663066	0.452	0.352	0.352
-0.655066	0.452	0.352	0.352
-0.647065	0.452	0.352	0.352
-0.639064	0.452	0.352	0.352
-0.631063	0.452	0.352	0.352
-0.623062	0.452	0.352	0.352
-0.615062	0.452	0.352	0.352
-0.607061	0.452	0.352	0.352
-0.59906	0.452	0.352	0.352
-0.591059	0.452	0.352	0.352
-0.583058	0.452	0.352	0.352
-0.575058	0.452	0.352	0.352
-0.567057	0.452	0.352	0.352
-0.559056	0.452	0.352	0.352
-0.551055	0.452	0.352	0.352
-0.543054	0.452	0.352	0.352
-0.535054	0.452	0.352	0.352
-0.527053	0.452	0.352	0.352
-0.519052	0.452	0.352	0.352
-0.511051	0.452	0.352	0.352
-0.50305	0.452	0.352	0.352
-0.49505	0.452	0.352	0.352
-0.487049	0.452	0.352	0.352
-0.479048	0.452	0.352	0.352
-0.471047	0.452	0.352	0.352
-0.463046	0.452	0.352	0.352
-0.455046	0.452	0.352	0.352
-0.447045	0.452	0.352	0.352
-0.439044	0.452	0.352	0.352
-0.431043	0.452	0.352	0.352
-0.423042	0.452	0.352	0.352
-0.415042	0.452	0.353	0.352
-0.407041	0.452	0.353	0.352
-0.39904	0.452	0.353	0.352
-0.391039	0.452	0.353	0.352
-0.383038	0.452	0.353	0.352
-0.375038	0.452	0.353	0.352
-0.367037	0.452	0.353	0.352
-0.359036	0.452	0.353	0.352
-0.351035	0.452	0.353	0.352
-0.343034	0.452	0.353	0.352
-0.335034	0.452	0.353	0.352
-0.327033	0.452	0.353	0.353
-0.319032	0.452	0.353	0.353
-0.311031	0.453	0.353	0.353
-0.30303	0.453	0.353	0.353
-0.29503	0.453	0.353	0.353
-0.287029	0.453	0.353	0.353
-0.279028	0.453	0.353	0.353
-0.271027	0.453	0.353	0.353
-0.263026	0.453	0.353	0.353
-0.255026	0.453	0.353	0.353
-0.247025	0.453	0.353	0.353
-0.239024	0.453	0.353	0.353
-0.231023	0.453	0.353	0.353
-0.223022	0.453	0.353	0.353
-0.215022	0.453	0.353	0.353
-0.207021	0.453	0.353	0.353
-0.19902	0.453	0.353	0.353
-0.191019	0.453	0.353	0.353
-0.183018	0.453	0.353	0.353
-0.175018	0.453	0.353	0.353
-0.167017	0.453	0.353	0.353
-0.159016	0.453	0.354	0.353
-0.151015	0.453	0.354	0.353
-0.143014	0.453	0.354	0.353
-0.135014	0.453	0.354	0.353
-0.127013	0.453	0.354	0.353
-0.119012	0.453	0.354	0.353
-0.111011	0.453	0.354	0.353
-0.10301	0.453	0.354	0.353
-0.0950095	0.453	0.354	0.353
-0.0870087	0.453	0.354	0.353
-0.0790079	0.453	0.354	0.353
-0.0710071	0.453	0.354	0.353
-0.0630063	0.453	0.354	0.353
-0.0550055	0.453	0.354	0.353
-0.0470047	0.453	0.354	0.353
-0.0390039	0.453	0.354	0.353
-0.0310031	0.453	0.354	0.353
-0.0230023	0.453	0.354	0.353
-0.0150015	0.453	0.354	0.353
-0.0070007	0.453	0.354	0.353
0.0010001	0.453	0.354	0.353
0.0090009	0.453	0.354	0.353
0.0170017	0.453	0.354	0.353
0.0250025	0.453	0.354	0.353
0.0330033	0.453	0.354	0.353
0.0410041	0.453	0.354	0.353
0.0490049	0.453	0.354	0.353
0.0570057	0.453	0.354	0.353
0.0650065	0.453	0.354	0.353
0.0730073	0.453	0.354	0.353
0.0810081	0.453	0.354	0.353
0.0890089	0.453	0.355	0.353
0.0970097	0.453	0.355	0.353
0.105011	0.453	0.355	0.353
0.113011	0.453	0.355	0.353
0.121012	0.453	0.355	0.353
0.129013	0.453	0.355	0.353
0.137014	0.453	0.355	0.353
0.145015	0.453	0.355	0.353
0.153015	0.453	0.355	0.353
0.161016	0.453	0.355	0.353
0.169017	0.453	0.355	0.353
0.177018	0.453	0.355	0.353
0.185019	0.453	0.355	0.353
0.193019	0.453	0.355	0.353
0.20102	0.453	0.355	0.353
0.209021	0.453	0.355	0.353
0.217022	0.453	0.355	0.353
0.225023	0.453	0.355	0.353
0.233023	0.453	0.355	0.353
0.241024	0.453	0.355	0.353
0.249025	0.453	0.355	0.353
0.257026	0.453	0.355	0.353
0.265027	0.453	0.355	0.353
0.273027	0.453	0.355	0.353
0.281028	0.453	0.355	0.353
0.289029	0.453	0.355	0.353
0.29703	0.453	0.355	0.353
0.305031	0.453	0.355	0.353
0.313031	0.453	0.355	0.353
0.321032	0.453	0.355	0.353
0.329033	0.453	0.355	0.353
0.337034	0.453	0.356	0.353
0.345035	0.453	0.356	0.353
0.353035	0.453	0.356	0.353
0.361036	0.453	0.356	0.353
0.369037	0.453	0.356	0.353
0.377038	0.453	0.356	0.353
0.385039	0.453	0.356	0.353
0.393039	0.453	0.356	0.354
0.40104	0.453	0.356	0.354
0.409041	0.453	0.356	0.354
0.417042	0.453	0.356	0.354
0.425043	0.453	0.356	0.354
0.433043	0.453	0.356	0.354
0.441044	0.454	0.356	0.354
0.449045	0.454	0.356	0.354
0.457046	0.454	0.356	0.354
0.465047	0.454	0.356	0.354
0.473047	0.454	0.356	0.354
0.481048	0.454	0.356	0.354
0.489049	0.454	0.356	0.354
0.49705	0.454	0.356	0.354
0.505051	0.454	0.356	0.354
0.513051	0.454	0.356	0.354
0.521052	0.454	0.356	0.354
0.529053	0.454	0.356	0.354
0.537054	0.454	0.356	0.354
0.545055	0.454	0.356	0.354
0.553055	0.454	0.356	0.354
0.561056	0.454	0.356	0.354
0.569057	0.454	0.356	0.354
0.577058	0.454	0.356	0.354
0.585059	0.454	0.357	0.354
0.593059	0.454	0.357	0.354
0.60106	0.454	0.357	0.354
0.609061	0.454	0.357	0.354
0.617062	0.454	0.357	0.354
0.625063	0.454	0.357	0.354
0.633063	0.454	0.357	0.354
0.641064	0.454	0.357	0.354
0.649065	0.454	0.357	0.354
0.657066	0.454	0.357	0.354
0.665067	0.454	0.357	0.354
0.673067	0.454	0.357	0.354
0.681068	0.454	0.357	0.354
0.689069	0.454	0.357	0.354
0.69707	0.454	0.357	0.354
0.705071	0.454	0.357	0.354
0.713071	0.454	0.357	0.354
0.721072	0.454	0.357	0.354
0.729073	0.454	0.357	0.354
0.737074	0.454	0.357	0.354
0.745075	0.454	0.357	0.354
0.753075	0.454	0.357	0.354
0.761076	0.454	0.357	0.354
0.769077	0.454	0.357	0.354
0.777078	0.454	0.357	0.354
0.785079	0.454	0.357	0.354
0.793079	0.454	0.357	0.354
0.80108	0.454	0.357	0.354
0.809081	0.454	0.357	0.354
0.817082	0.454	0.357	0.354
0.825083	0.454	0.358	0.354
0.833083	0.454	0.358	0.354
0.841084	0.454	0.358	0.354
0.849085	0.454	0.358	0.354
0.857086	0.454	0.358	0.354
0.865087	0.454	0.358	0.354
0.873087	0.454	0.358	0.354
0.881088	0.454	0.358	0.354
0.889089	0.454	0.358	0.354
0.89709	0.454	0.358	0.354
0.905091	0.454	0.358	0.354
0.913091	0.454	0.358	0.354
0.921092	0.454	0.358	0.354
0.929093	0.454	0.358	0.354
0.937094	0.454	0.358	0.354
0.945095	0.454	0.358	0.354
0.953095	0.454	0.358	0.354
0.961096	0.454	0.358	0.354
0.969097	0.454	0.358	0.354
0.977098	0.454	0.358	0.354
0.985099	0.454	0.358	0.354
0.993099	0.454	0.358	0.354
1.0011	0.454	0.358	0.354
1.0091	0.454	0.358	0.354
1.0171	0.454	0.358	0.354
1.0251	0.454	0.358	0.354
1.0331	0.454	0.358	0.354
1.0411	0.454	0.358	0.354
1.0491	0.454	0.358	0.354
1.05711	0.454	0.358	0.354
1.06511	0.454	0.358	0.354
1.07311	0.454	0.359	0.354
1.08111	0.454	0.359	0.354
1.08911	0.454	0.359	0.354
1.09711	0.454	0.359	0.354
1.10511	0.454	0.359	0.354
1.11311	0.454	0.359	0.354
1.12111	0.454	0.359	0.354
1.12911	0.454	0.359	0.355
1.13711	0.454	0.359	0.355
1.14511	0.454	0.359	0.355
1.15312	0.454	0.359	0.355
1.16112	0.454	0.359	0.355
1.16912	0.454	0.359	0.355
1.17712	0.454	0.359	0.355
1.18512	0.455	0.359	0.355
1.19312	0.455	0.359	0.355
1.20112	0.455	0.359	0.355
1.20912	0.455	0.359	0.355
1.21712	0.455	0.359	0.355
1.22512	0.455	0.359	0.355
1.23312	0.455	0.359	0.355
1.24112	0.455	0.359	0.355
1.24912	0.455	0.359	0.355
1.25713	0.455	0.359	0.355
1.26513	0.455	0.359	0.355
1.27313	0.455	0.359	0.355
1.28113	0.455	0.359	0.355
1.28913	0.455	0.359	0.355
1.29713	0.455	0.359	0.355
1.30513	0.455	0.359	0.355
1.31313	0.455	0.36	0.355
1.32113	0.455	0.36	0.355
1.32913	0.455	0.36	0.355
1.33713	0.455	0.36	0.355
1.34513	0.455	0.36	0.355
1.35314	0.455	0.36	0.355
1.36114	0.455	0.36	0.355
1.36914	0.455	0.36	0.355
1.37714	0.455	0.36	0.355
1.38514	0.455	0.36	0.355
1.39314	0.455	0.36	0.355
1.40114	0.455	0.36	0.355
1.40914	0.455	0.36	0.355
1.41714	0.455	0.36	0.355
1.42514	0.455	0.36	0.355
1.43314	0.455	0.36	0.355
1.44114	0.455	0.36	0.355
1.44914	0.455	0.36	0.355
1.45715	0.455	0.36	0.355
1.46515	0.455	0.36	0.355
1.47315	0.455	0.36	0.355
1.48115	0.455	0.36	0.355
1.48915	0.455	0.36	0.355
1.49715	0.455	0.36	0.355
1.50515	0.455	0.36	0.355
1.51315	0.455	0.36	0.355
1.52115	0.455	0.36	0.355
1.52915	0.455	0.36	0.355
1.53715	0.455	0.36	0.355
1.54515	0.455	0.36	0.355
1.55316	0.455	0.361	0.355
1.56116	0.455	0.361	0.355
1.56916	0.455	0.361	0.355
1.57716	0.455	0.361	0.355
1.58516	0.455	0.361	0.355
1.59316	0.455	0.361	0.355
1.60116	0.455	0.361	0.355
1.60916	0.455	0.361	0.355
1.61716	0.455	0.361	0.355
1.62516	0.455	0.361	0.355
1.63316	0.455	0.361	0.355
1.64116	0.455	0.361	0.355
1.64916	0.455	0.361	0.355
1.65717	0.455	0.361	0.355
1.66517	0.455	0.361	0.355
1.67317	0.455	0.361	0.355
1.68117	0.455	0.361	0.355
1.68917	0.455	0.361	0.355
1.69717	0.455	0.361	0.355
1.70517	0.455	0.361	0.355
1.71317	0.455	0.361	0.355
1.72117	0.455	0.361	0.355
1.72917	0.455	0.361	0.355
1.73717	0.455	0.361	0.355
1.74517	0.455	0.361	0.355
1.75318	0.455	0.361	0.355
1.76118	0.455	0.361	0.355
1.76918	0.455	0.361	0.355
1.77718	0.455	0.361	0.355
1.78518	0.455	0.362	0.355
1.79318	0.455	0.362	0.355
1.80118	0.455	0.362	0.355
1.80918	0.455	0.362	0.355
1.81718	0.455	0.362	0.355
1.82518	0.455	0.362	0.355
1.83318	0.455	0.362	0.355
1.84118	0.455	0.362	0.355
1.84918	0.455	0.362	0.355
1.85719	0.455	0.362	0.355
1.86519	0.455	0.362	0.355
1.87319	0.455	0.362	0.355
1.88119	0.455	0.362	0.356
1.88919	0.455	0.362	0.356
1.89719	0.455	0.362	0.356
1.90519	0.455	0.362	0.356
1.91319	0.455	0.362	0.356
1.92119	0.455	0.362	0.356
1.92919	0.455	0.362	0.356
1.93719	0.456	0.362	0.356
1.94519	0.456	0.362	0.356
1.9532	0.456	0.362	0.356
1.9612	0.456	0.362	0.356
1.9692	0.456	0.362	0.356
1.9772	0.456	0.362	0.356
1.9852	0.456	0.362	0.356
1.9932	0.456	0.362	0.356
2.0012	0.456	0.362	0.356
2.0092	0.456	0.362	0.356
2.0172	0.456	0.362	0.356
2.0252	0.456	0.363	0.356
2.0332	0.456	0.363	0.356
2.0412	0.456	0.363	0.356
2.0492	0.456	0.363	0.356
2.05721	0.456	0.363	0.356
2.06521	0.456	0.363	0.356
2.07321	0.456	0.363	0.356
2.08121	0.456	0.363	0.356
2.08921	0.456	0.363	0.356
2.09721	0.456	0.363	0.356
2.10521	0.456	0.363	0.356
2.11321	0.456	0.363	0.356
2.12121	0.456	0.363	0.356
2.12921	0.456	0.363	0.356
2.13721	0.456	0.363	0.356
2.14521	0.456	0.363	0.356
2.15322	0.456	0.363	0.356
2.16122	0.456	0.363	0.356
2.16922	0.456	0.363	0.356
2.17722	0.456	0.363	0.356
2.18522	0.456	0.363	0.356
2.19322	0.456	0.363	0.356
2.20122	0.456	0.363	0.356
2.20922	0.456	0.363	0.356
2.21722	0.456	0.363	0.356
2.22522	0.456	0.363	0.356
2.23322	0.456	0.363	0.356
2.24122	0.456	0.363	0.356
2.24922	0.456	0.363	0.356
2.25723	0.456	0.364	0.356
2.26523	0.456	0.364	0.356
2.27323	0.456	0.364	0.356
2.28123	0.456	0.364	0.356
2.28923	0.456	0.364	0.356
2.29723	0.456	0.364	0.356
2.30523	0.456	0.364	0.356
2.31323	0.456	0.364	0.356
2.32123	0.456	0.364	0.356
2.32923	0.456	0.364	0.356
2.33723	0.456	0.364	0.356
2.34523	0.456	0.364	0.356
2.35324	0.456	0.364	0.356
2.36124	0.456	0.364	0.356
2.36924	0.456	0.364	0.356
2.37724	0.456	0.364	0.356
2.38524	0.456	0.364	0.356
2.39324	0.456	0.364	0.356
2.40124	0.456	0.364	0.356
2.40924	0.456	0.364	0.356
2.41724	0.456	0.364	0.356
2.42524	0.456	0.364	0.356
2.43324	0.456	0.364	0.356
2.44124	0.456	0.364	0.356
2.44924	0.456	0.364	0.356
2.45725	0.456	0.364	0.356
2.46525	0.456	0.364	0.356
2.47325	0.456	0.364	0.356
2.48125	0.456	0.364	0.356
2.48925	0.456	0.365	0.356
2.49725	0.456	0.365	0.356
2.50525	0.456	0.365	0.356
2.51325	0.456	0.365	0.356
2.52125	0.456	0.365	0.356
2.52925	0.456	0.365	0.356
2.53725	0.456	0.365	0.356
2.54525	0.456	0.365	0.356
2.55326	0.456	0.365	0.356
2.56126	0.456	0.365	0.356
2.56926	0.456	0.365	0.356
2.57726	0.456	0.365	0.356
2.58526	0.456	0.365	0.356
2.59326	0.456	0.365	0.356
2.60126	0.456	0.365	0.356
2.60926	0.456	0.365	0.356
2.61726	0.456	0.365	0.356
2.62526	0.456	0.365	0.356
2.63326	0.456	0.365	0.356
2.64126	0.456	0.365	0.356
2.64926	0.456	0.365	0.357
2.65727	0.456	0.365	0.357
2.66527	0.456	0.365	0.357
2.67327	0.456	0.365	0.357
2.68127	0.456	0.365	0.357
2.68927	0.457	0.365	0.357
2.69727	0.457	0.365	0.357
2.70527	0.457	0.365	0.357
2.71327	0.457	0.365	0.357
2.72127	0.457	0.366	0.357
2.72927	0.457	0.366	0.357
2.73727	0.457	0.366	0.357
2.74527	0.457	0.366	0.357
2.75328	0.457	0.366	0.357
2.76128	0.457	0.366	0.357
2.76928	0.457	0.366	0.357
2.77728	0.457	0.366	0.357
2.78528	0.457	0.366	0.357
2.79328	0.457	0.366	0.357
2.80128	0.457	0.366	0.357
2.80928	0.457	0.366	0.357
2.81728	0.457	0.366	0.357
2.82528	0.457	0.366	0.357
2.83328	0.457	0.366	0.357
2.84128	0.457	0.366	0.357
2.84928	0.457	0.366	0.357
2.85729	0.457	0.366	0.357
2.86529	0.457	0.366	0.357
2.87329	0.457	0.366	0.357
2.88129	0.457	0.366	0.357
2.88929	0.457	0.366	0.357
2.89729	0.457	0.366	0.357
2.90529	0.457	0.366	0.357
2.91329	0.457	0.366	0.357
2.92129	0.457	0.366	0.357
2.92929	0.457	0.366	0.357
2.93729	0.457	0.366	0.357
2.94529	0.457	0.366	0.357
2.9533	0.457	0.367	0.357
2.9613	0.457	0.367	0.357
2.9693	0.457	0.367	0.357
2.9773	0.457	0.367	0.357
2.9853	0.457	0.367	0.357
2.9933	0.457	0.367	0.357
3.0013	0.457	0.367	0.357
3.0093	0.457	0.367	0.357
3.0173	0.457	0.367	0.357
3.0253	0.457	0.367	0.357
3.0333	0.457	0.367	0.357
3.0413	0.457	0.367	0.357
3.0493	0.457	0.367	0.357
3.05731	0.457	0.367	0.357
3.06531	0.457	0.367	0.357
3.07331	0.457	0.367	0.357
3.08131	0.457	0.367	0.357
3.08931	0.457	0.367	0.357
3.09731	0.457	0.367	0.357
3.10531	0.457	0.367	0.357
3.11331	0.457	0.367	0.357
3.12131	0.457	0.367	0.357
3.12931	0.457	0.367	0.357
3.13731	0.457	0.367	0.357
3.14531	0.457	0.367	0.357
3.15332	0.457	0.367	0.357
3.16132	0.457	0.367	0.357
3.16932	0.457	0.367	0.357
3.17732	0.457	0.367	0.357
3.18532	0.457	0.368	0.357
3.19332	0.457	0.368	0.357
3.20132	0.457	0.368	0.357
3.20932	0.457	0.368	0.357
3.21732	0.457	0.368	0.357
3.22532	0.457	0.368	0.357
3.23332	0.457	0.368	0.357
3.24132	0.457	0.368	0.357
3.24932	0.457	0.368	0.357
3.25733	0.457	0.368	0.357
3.26533	0.457	0.368	0.357
3.27333	0.457	0.368	0.357
3.28133	0.457	0.368	0.357
3.28933	0.457	0.368	0.357
3.29733	0.457	0.368	0.357
3.30533	0.457	0.368	0.357
3.31333	0.457	0.368	0.357
3.32133	0.457	0.368	0.357
3.32933	0.457	0.368	0.357
3.33733	0.457	0.368	0.357
3.34533	0.457	0.368	0.357
3.35334	0.457	0.368	0.357
3.36134	0.457	0.368	0.357
3.36934	0.457	0.368	0.357
3.37734	0.457	0.368	0.357
3.38534	0.457	0.368	0.357
3.39334	0.457	0.368	0.357
3.40134	0.457	0.368	0.357
3.40934	0.457	0.368	0.357
3.41734	0.457	0.369	0.357
3.42534	0.457	0.369	0.358
3.43334	0.457	0.369	0.358
3.44134	0.458	0.369	0.358
3.44934	0.458	0.369	0.358
3.45735	0.458	0.369	0.358
3.46535	0.458	0.369	0.358
3.47335	0.458	0.369	0.358
3.48135	0.458	0.369	0.358
3.48935	0.458	0.369	0.358
3.49735	0.458	0.369	0.358
3.50535	0.458	0.369	0.358
3.51335	0.458	0.369	0.358
3.52135	0.458	0.369	0.358
3.52935	0.458	0.369	0.358
3.53735	0.458	0.369	0.358
3.54535	0.458	0.369	0.358
3.55336	0.458	0.369	0.358
3.56136	0.458	0.369	0.358
3.56936	0.458	0.369	0.358
3.57736	0.458	0.369	0.358
3.58536	0.458	0.369	0.358
3.59336	0.458	0.369	0.358
3.60136	0.458	0.369	0.358
3.60936	0.458	0.369	0.358
3.61736	0.458	0.369	0.358
3.62536	0.458	0.369	0.358
3.63336	0.458	0.369	0.358
3.64136	0.458	0.37	0.358
3.64936	0.458	0.37	0.358
3.65737	0.458	0.37	0.358
3.66537	0.458	0.37	0.358
3.67337	0.458	0.37	0.358
3.68137	0.458	0.37	0.358
3.68937	0.458	0.37	0.358
3.69737	0.458	0.37	0.358
3.70537	0.458	0.37	0.358
3.71337	0.458	0.37	0.358
3.72137	0.458	0.37	0.358
3.72937	0.458	0.37	0.358
3.73737	0.458	0.37	0.358
3.74537	0.458	0.37	0.358
3.75338	0.458	0.37	0.358
3.76138	0.458	0.37	0.358
3.76938	0.458	0.37	0.358
3.77738	0.458	0.37	0.358
3.78538	0.458	0.37	0.358
3.79338	0.458	0.37	0.358
3.80138	0.458	0.37	0.358
3.80938	0.458	0.37	0.358
3.81738	0.458	0.37	0.358
3.82538	0.458	0.37	0.358
3.83338	0.458	0.37	0.358
3.84138	0.458	0.37	0.358
3.84938	0.458	0.37	0.358
3.85739	0.458	0.37	0.358
3.86539	0.458	0.371	0.358
3.87339	0.458	0.371	0.358
3.88139	0.458	0.371	0.358
3.88939	0.458	0.371	0.358
3.89739	0.458	0.371	0.358
3.90539	0.458	0.371	0.358
3.91339	0.458	0.371	0.358
3.92139	0.458	0.371	0.358
3.92939	0.458	0.371	0.358
3.93739	0.458	0.371	0.358
3.94539	0.458	0.371	0.358
3.9534	0.458	0.371	0.358
3.9614	0.458	0.371	0.358
3.9694	0.458	0.371	0.358
3.9774	0.458	0.371	0.358
3.9854	0.458	0.371	0.358
3.9934	0.458	0.371	0.358
4.0014	0.458	0.371	0.358
4.0094	0.458	0.371	0.358
4.0174	0.458	0.371	0.358
4.0254	0.458	0.371	0.358
4.0334	0.458	0.371	0.358
4.0414	0.458	0.371	0.358
4.0494	0.458	0.371	0.358
4.05741	0.458	0.371	0.358
4.06541	0.458	0.371	0.358
4.07341	0.458	0.371	0.358
4.08141	0.458	0.371	0.358
4.08941	0.458	0.371	0.358
4.09741	0.458	0.372	0.358
4.10541	0.458	0.372	0.358
4.11341	0.458	0.372	0.358
4.12141	0.458	0.372	0.358
4.12941	0.458	0.372	0.358
4.13741	0.458	0.372	0.358
4.14541	0.458	0.372	0.358
4.15342	0.458	0.372	0.358
4.16142	0.458	0.372	0.358
4.16942	0.458	0.372	0.358
4.17742	0.458	0.372	0.358
4.18542	0.458	0.372	0.358
4.19342	0.458	0.372	0.358
4.20142	0.458	0.372	0.358
4.20942	0.459	0.372	0.358
4.21742	0.459	0.372	0.358
4.22542	0.459	0.372	0.359
4.23342	0.459	0.372	0.359
4.24142	0.459	0.372	0.359
4.24942	0.459	0.372	0.359
4.25743	0.459	0.372	0.359
4.26543	0.459	0.372	0.359
4.27343	0.459	0.372	0.359
4.28143	0.459	0.372	0.359
4.28943	0.459	0.372	0.359
4.29743	0.459	0.372	0.359
4.30543	0.459	0.372	0.359
4.31343	0.459	0.372	0.359
4.32143	0.459	0.373	0.359
4.32943	0.459	0.373	0.359
4.33743	0.459	0.373	0.359
4.34543	0.459	0.373	0.359
4.35344	0.459	0.373	0.359
4.36144	0.459	0.373	0.359
4.36944	0.459	0.373	0.359
4.37744	0.459	0.373	0.359
4.38544	0.459	0.373	0.359
4.39344	0.459	0.373	0.359
4.40144	0.459	0.373	0.359
4.40944	0.459	0.373	0.359
4.41744	0.459	0.373	0.359
4.42544	0.459	0.373	0.359
4.43344	0.459	0.373	0.359
4.44144	0.459	0.373	0.359
4.44944	0.459	0.373	0.359
4.45745	0.459	0.373	0.359
4.46545	0.459	0.373	0.359
4.47345	0.459	0.373	0.359
4.48145	0.459	0.373	0.359
4.48945	0.459	0.373	0.359
4.49745	0.459	0.373	0.359
4.50545	0.459	0.373	0.359
4.51345	0.459	0.373	0.359
4.52145	0.459	0.373	0.359
4.52945	0.459	0.373	0.359
4.53745	0.459	0.373	0.359
4.54545	0.459	0.374	0.359
4.55346	0.459	0.374	0.359
4.56146	0.459	0.374	0.359
4.56946	0.459	0.374	0.359
4.57746	0.459	0.374	0.359
4.58546	0.459	0.374	0.359
4.59346	0.459	0.374	0.359
4.60146	0.459	0.374	0.359
4.60946	0.459	0.374	0.359
4.61746	0.459	0.374	0.359
4.62546	0.459	0.374	0.359
4.63346	0.459	0.374	0.359
4.64146	0.459	0.374	0.359
4.64946	0.459	0.374	0.359
4.65747	0.459	0.374	0.359
4.66547	0.459	0.374	0.359
4.67347	0.459	0.374	0.359
4.68147	0.459	0.374	0.359
4.68947	0.459	0.374	0.359
4.69747	0.459	0.374	0.359
4.70547	0.459	0.374	0.359
4.71347	0.459	0.374	0.359
4.72147	0.459	0.374	0.359
4.72947	0.459	0.374	0.359
4.73747	0.459	0.374	0.359
4.74547	0.459	0.374	0.359
4.75348	0.459	0.374	0.359
4.76148	0.459	0.374	0.359
4.76948	0.459	0.375	0.359
4.77748	0.459	0.375	0.359
4.78548	0.459	0.375	0.359
4.79348	0.459	0.375	0.359
4.80148	0.459	0.375	0.359
4.80948	0.459	0.375	0.359
4.81748	0.459	0.375	0.359
4.82548	0.459	0.375	0.359
4.83348	0.459	0.375	0.359
4.84148	0.459	0.375	0.359
4.84948	0.459	0.375	0.359
4.85749	0.459	0.375	0.359
4.86549	0.459	0.375	0.359
4.87349	0.459	0.375	0.359
4.88149	0.459	0.375	0.359
4.88949	0.459	0.375	0.359
4.89749	0.459	0.375	0.359
4.90549	0.459	0.375	0.359
4.91349	0.459	0.375	0.359
4.92149	0.459	0.375	0.359
4.92949	0.459	0.375	0.359
4.93749	0.459	0.375	0.359
4.94549	0.459	0.375	0.359
4.9535	0.459	0.375	0.359
4.9615	0.459	0.375	0.359
4.9695	0.459	0.375	0.359
4.9775	0.46	0.375	0.359
4.9855	0.46	0.376	0.359
4.9935	0.46	0.376	0.359
5.0015	0.46	0.376	0.359
5.0095	0.46	0.376	0.359
5.0175	0.46	0.376	0.359
5.0255	0.46	0.376	0.359
5.0335	0.46	0.376	0.36
5.0415	0.46	0.376	0.36
5.0495	0.46	0.376	0.36
5.05751	0.46	0.376	0.36
5.06551	0.46	0.376	0.36
5.07351	0.46	0.376	0.36
5.08151	0.46	0.376	0.36
5.08951	0.46	0.376	0.36
5.09751	0.46	0.376	0.36
5.10551	0.46	0.376	0.36
5.11351	0.46	0.376	0.36
5.12151	0.46	0.376	0.36
5.12951	0.46	0.376	0.36
5.13751	0.46	0.376	0.36
5.14551	0.46	0.376	0.36
5.15352	0.46	0.376	0.36
5.16152	0.46	0.376	0.36
5.16952	0.46	0.376	0.36
5.17752	0.46	0.376	0.36
5.18552	0.46	0.376	0.36
5.19352	0.46	0.376	0.36
5.20152	0.46	0.376	0.36
5.20952	0.46	0.377	0.36
5.21752	0.46	0.377	0.36
5.22552	0.46	0.377	0.36
5.23352	0.46	0.377	0.36
5.24152	0.46	0.377	0.36
5.24952	0.46	0.377	0.36
5.25753	0.46	0.377	0.36
5.26553	0.46	0.377	0.36
5.27353	0.46	0.377	0.36
5.28153	0.46	0.377	0.36
5.28953	0.46	0.377	0.36
5.29753	0.46	0.377	0.36
5.30553	0.46	0.377	0.36
5.31353	0.46	0.377	0.36
5.32153	0.46	0.377	0.36
5.32953	0.46	0.377	0.36
5.33753	0.46	0.377	0.36
5.34553	0.46	0.377	0.36
5.35354	0.46	0.377	0.36
5.36154	0.46	0.377	0.36
5.36954	0.46	0.377	0.36
5.37754	0.46	0.377	0.36
5.38554	0.46	0.377	0.36
5.39354	0.46	0.377	0.36
5.40154	0.46	0.377	0.36
5.40954	0.46	0.377	0.36
5.41754	0.46	0.377	0.36
5.42554	0.46	0.377	0.36
5.43354	0.46	0.378	0.36
5.44154	0.46	0.378	0.36
5.44954	0.46	0.378	0.36
5.45755	0.46	0.378	0.36
5.46555	0.46	0.378	0.36
5.47355	0.46	0.378	0.36
5.48155	0.46	0.378	0.36
5.48955	0.46	0.378	0.36
5.49755	0.46	0.378	0.36
5.50555	0.46	0.378	0.36
5.51355	0.46	0.378	0.36
5.52155	0.46	0.378	0.36
5.52955	0.46	0.378	0.36
5.53755	0.46	0.378	0.36
5.54555	0.46	0.378	0.36
5.55356	0.46	0.378	0.36
5.56156	0.46	0.378	0.36
5.56956	0.46	0.378	0.36
5.57756	0.46	0.378	0.36
5.58556	0.46	0.378	0.36
5.59356	0.46	0.378	0.36
5.60156	0.46	0.378	0.36
5.60956	0.46	0.378	0.36
5.61756	0.46	0.378	0.36
5.62556	0.46	0.378	0.36
5.63356	0.46	0.378	0.36
5.64156	0.46	0.378	0.36
5.64956	0.46	0.379	0.36
5.65757	0.46	0.379	0.36
5.66557	0.46	0.379	0.36
5.67357	0.46	0.379	0.36
5.68157	0.46	0.379	0.36
5.68957	0.46	0.379	0.36
5.69757	0.46	0.379	0.36
5.70557	0.46	0.379	0.36
5.71357	0.46	0.379	0.36
5.72157	0.46	0.379	0.36
5.72957	0.46	0.379	0.36
5.73757	0.46	0.379	0.36
5.74557	0.46	0.379	0.36
5.75358	0.46	0.379	0.36
5.76158	0.461	0.379	0.36
5.76958	0.461	0.379	0.36
5.77758	0.461	0.379	0.36
5.78558	0.461	0.379	0.36
5.79358	0.461	0.379	0.36
5.80158	0.461	0.379	0.36
5.80958	0.461	0.379	0.36
5.81758	0.461	0.379	0.36
5.82558	0.461	0.379	0.36
5.83358	0.461	0.379	0.36
5.84158	0.461	0.379	0.36
5.84958	0.461	0.379	0.36
5.85759	0.461	0.379	0.361
5.86559	0.461	0.379	0.361
5.87359	0.461	0.38	0.361
5.88159	0.461	0.38	0.361
5.88959	0.461	0.38	0.361
5.89759	0.461	0.38	0.361
5.90559	0.461	0.38	0.361
5.91359	0.461	0.38	0.361
5.92159	0.461	0.38	0.361
5.92959	0.461	0.38	0.361
5.93759	0.461	0.38	0.361
5.94559	0.461	0.38	0.361
5.9536	0.461	0.38	0.361
5.9616	0.461	0.38	0.361
5.9696	0.461	0.38	0.361
5.9776	0.461	0.38	0.361
5.9856	0.461	0.38	0.361
[truncated: 8,001 more rows]

## Sheet: exp. boundary dynamics
WT				Stau-				Bcd1.0
time(min)	xhb(EL)	STD(EL)		time(min)	xhb(EL)	STD(EL)		time(min)	xhb(EL)	STD(EL)
2.5	0.4437	0.0118		2.5	0.3756	0.0169		17	0.3742	0.0145
7.5	0.4593	0.0165		7.5	0.399	0.0249		27	0.3732	0.0142
12.5	0.4773	0.0108		12.5	0.4179	0.0127		33.5	0.3811	0.0117
17.5	0.46	0.015		17.5	0.427	0		42	0.3885	0.0125
22.5	0.4829	0.008		22.5	0.4344	0.0073		50	0.3947	0.0101
27.5	0.4667	0.009		27.5	0.4459	0.0107		57	0.3987	0.0176
32.5	0.4728	0.0127		32.5	0.4553	0.0138
37.5	0.471	0.0175		37.5	0.4653	0.0146
42.5	0.4784	0.0043		42.5	0.48	0.0103
47.5	0.4763	0.0102		47.5	0.4719	0.0159
52.5	0.4808	0.0028		52.5	0.4782	0.0147
57.5	0.472	0.0143		57.5	0.4785	0.0085
